# Supplementary material
Source: publisher figshare collection journal article supplement (https://springernature.figshare.com/ndownloader/files/12278864)
Supplement: Supplementary file 1 [file 12278864]

## Sheet: Labels
s_14	1	Mand
s_14	2	Kvinde
s_1	0	0
s_1	5	5
s_1	10	10
s_1	15	15
s_1	20	20
s_1	25	25
s_1	30	30
s_1	35	35
s_1	40	40
s_1	45	45
s_1	50	50
s_1	55	55
s_1	60	over 60
s_35_1	0	Ikke valgt
s_35_1	1	Valgt
s_35_2	0	Ikke valgt
s_35_2	1	Valgt
s_35_3	0	Ikke valgt
s_35_3	1	Valgt
s_35_4	0	Ikke valgt
s_35_4	1	Valgt
s_35_5	0	Ikke valgt
s_35_5	1	Valgt
s_35_6	0	Ikke valgt
s_35_6	1	Valgt
s_18	1	I meget høj grad
s_18	2	I høj grad
s_18	3	I nogen grad
s_18	4	I mindre grad
s_18	5	Slet ikke
s_18	6	Ved ikke
s_21	1	I meget høj grad
s_21	2	I høj grad
s_21	3	I nogen grad
s_21	4	I mindre grad
s_21	5	Slet ikke
s_21	6	Ved ikke
s_22	1	I meget høj grad
s_22	2	I høj grad
s_22	3	I nogen grad
s_22	4	I mindre grad
s_22	5	Slet ikke
s_22	6	Ved ikke
s_23	1	I meget høj grad
s_23	2	I høj grad
s_23	3	I nogen grad
s_23	4	I mindre grad
s_23	5	Slet ikke
s_23	6	Ved ikke
s_24	1	I meget høj grad
s_24	2	I høj grad
s_24	3	I nogen grad
s_24	4	I mindre grad
s_24	5	Slet ikke
s_24	6	Ved ikke
s_45	1	I meget høj grad
s_45	2	I høj grad
s_45	3	I nogen grad
s_45	4	I mindre grad
s_45	5	Slet ikke
s_45	6	Ved ikke
s_32	1	I meget høj grad
s_32	2	I høj grad
s_32	3	I nogen grad
s_32	4	I mindre grad
s_32	5	Slet ikke
s_32	6	Ved ikke
s_33	1	I meget høj grad
s_33	2	I høj grad
s_33	3	I nogen grad
s_33	4	I mindre grad
s_33	5	Slet ikke
s_33	6	Ved ikke
s_42	1	I meget høj grad
s_42	2	I høj grad
s_42	3	I nogen grad
s_42	4	I mindre grad
s_42	5	Slet ikke
s_42	6	Ved ikke
s_47	1	I meget høj grad
s_47	2	I høj grad
s_47	3	I nogen grad
s_47	4	I mindre grad
s_47	5	Slet ikke
s_47	6	Ved ikke
s_48	1	I meget høj grad
s_48	2	I høj grad
s_48	3	I nogen grad
s_48	4	I mindre grad
s_48	5	Slet ikke
s_48	6	Ved ikke
s_49	1	I meget høj grad
s_49	2	I høj grad
s_49	3	I nogen grad
s_49	4	I mindre grad
s_49	5	Slet ikke
s_49	6	Ved ikke
s_50	1	I meget høj grad
s_50	2	I høj grad
s_50	3	I nogen grad
s_50	4	I mindre grad
s_50	5	Slet ikke
s_50	6	Ved ikke
s_52	1	Meget gode
s_52	2	Gode
s_52	3	Middel
s_52	4	Dårlige
s_52	5	Meget dårlige
s_52	6	Ved ikke
s_52_1	1	Meget gode
s_52_1	2	Gode
s_52_1	3	Middel
s_52_1	4	Dårlige
s_52_1	5	Meget dårlige
s_52_1	6	Ved ikke
s_52_2	1	Meget gode
s_52_2	2	Gode
s_52_2	3	Middel
s_52_2	4	Dårlige
s_52_2	5	Meget dårlige
s_52_2	6	Ved ikke
s_52_3	1	Meget gode
s_52_3	2	Gode
s_52_3	3	Middel
s_52_3	4	Dårlige
s_52_3	5	Meget dårlige
s_52_3	6	Ved ikke
s_54	1	Meget gode
s_54	2	Gode
s_54	3	Middel
s_54	4	Dårlige
s_54	5	Meget dårlige
s_54	6	Ved ikke
s_53	1	Ja
s_53	2	Nej
s_53	3	Måske
s_53	4	Ved ikke
s_40	1	Træner hårdt og dyrker konkurrenceidræt regelmæssigt og flere gange om ugen
s_40	2	Dyrker motionsidræt, løber eller lignende mindst 4 timer om ugen
s_40	3	Spadserer, cykler eller har anden lettere motion mindst 4 timer om ugen (medregn også cykling/gang til skole)
s_40	4	Læser, ser fjernsyn eller har anden stillesiddende beskæftigelse
s_38	1	Virkelig god
s_38	2	God
s_38	3	Nogenlunde
s_38	4	Mindre god
s_38	5	Dårlig
s_39	1	Ja
s_39	2	Nej
s_39	3	Ved ikke
s_17	1	Jeg klarer mig meget godt
s_17	2	Jeg klarer mig godt
s_17	3	Jeg klarer mig middelt
s_17	4	Jeg klarer mig ikke så godt
s_17	5	Jeg klarer mig slet ikke godt
s_17	6	Ved ikke
s_26	1	I meget høj grad
s_26	2	I høj grad
s_26	3	I nogen grad
s_26	4	I mindre grad
s_26	5	Slet ikke
s_26	6	Ved ikke
s_25	1	Nej
s_25	2	Ja en gang imellem til fester
s_25	3	ja, 1-5 cigaretter om dagen
s_25	4	ja, 6-10 cigaretter om dagen
s_25	5	Ja, mere en 11 cigaretter om dagen
s_43	2	Ja - Omsorg, sundhed og pædagogik
s_43	3	Ja - Kontor, handel og forretningsservice
s_43	4	Ja - Fødevarer, jordbrug og oplevelser
s_43	5	Ja - Teknologi, byggeri og transport.
s_43	6	Nej - jeg ved ikke hvilket hovedområde, jeg er tilknyttet (skriv gerne hvad din uddannelse hedder)
stato_1	0	Ikke valgt
stato_1	1	Valgt
stato_2	0	Ikke valgt
stato_2	1	Valgt
stato_3	0	Ikke valgt
stato_3	1	Valgt
stato_4	0	Ikke valgt
stato_4	1	Valgt
stato_5	0	Ikke valgt
stato_5	1	Valgt
c_1	1
c_2	1
c_3	1
c_4	1	0-10 minutter
c_4	2	15-25 minutter
c_4	3	30-40 minutter
c_4	4	45 - over 60 min
c_5	1	14
c_5	2	15
c_5	3	16
c_5	4	17
c_5	5	18
c_5	6	19

## Sheet: Variables
variableName	variableDescription
s_14	Hvilket køn er du?
s_15	Hvor gammel er du?
s_1	Hvor mange minutters motion og bevægelse vurderer du, at der har været i gennemsnit om dagen på dit grundforløb 1?
s_35_1	Hvornår har du oplevet bevægelse og motion på grundforløb 1? - Til sociale arrangementer
s_35_2	Hvornår har du oplevet bevægelse og motion på grundforløb 1? - I den boglige undervisning
s_35_3	Hvornår har du oplevet bevægelse og motion på grundforløb 1? - Vi har haft motion/idræt på skemaet
s_35_4	Hvornår har du oplevet bevægelse og motion på grundforløb 1? - I pauserne
s_35_5	Hvornår har du oplevet bevægelse og motion på grundforløb 1? - Inden eller efter skoletid
s_35_6	Hvornår har du oplevet bevægelse og motion på grundforløb 1? - Andet
s_2	Hvornår har du oplevet bevægelse og motion på grundforløb 1? - Andet
s_18	Hvad synes du om motion og bevægelse i skolen? - Det er godt for det sociale i klassen
s_21	Hvad synes du om motion og bevægelse i skolen? - Det hjælper til, at jeg bedre kan koncentrere mig
s_22	Hvad synes du om motion og bevægelse i skolen? - Det gør, at det er sjovere at gå i skole
s_23	Hvad synes du om motion og bevægelse i skolen? - Det er et dejligt afbræk i den boglige undervisng
s_24	Hvad synes du om motion og bevægelse i skolen? - Det gør, at jeg har lært mere om min sundhed
s_45	Hvad synes du om motion og bevægelse i skolen? - Det gør mig sundere
s_32	Hvad synes du om motion og bevægelse i skolen? - Det er forstyrende for min undervisning
s_33	Hvad synes du om motion og bevægelse i skolen? - Det giver ikke mening at bruge tid på i løbet af skoledagen
s_42	Hvad synes du om motion og bevægelse i skolen? - Det er en god idé
s_47	Har følgende betydning for, om du deltager i motion og bevægelse på grundforløb 1? - at min lærer sætter aktiviteten igang
s_48	Har følgende betydning for, om du deltager i motion og bevægelse på grundforløb 1? - at mine klassekammerater også bevæger sig
s_49	Har følgende betydning for, om du deltager i motion og bevægelse på grundforløb 1? - at det er sjove aktiviteter vi laver
s_50	Har følgende betydning for, om du deltager i motion og bevægelse på grundforløb 1? - at jeg forstår, hvorfor vi skal bevæge os
s_52	Hvad synes du, om jeres faciliteter til bevægelse på skolen? - Skolens undervisningslokaler
s_52_1	Hvad synes du, om jeres faciliteter til bevægelse på skolen? - Uderum (græsplæne, skov mv.)
s_52_2	Hvad synes du, om jeres faciliteter til bevægelse på skolen? - Fællesarealer (gang, aula, trapper mv.)
s_52_3	Hvad synes du, om jeres faciliteter til bevægelse på skolen? - Idrætshal
s_54	Hvad synes du, om jeres faciliteter til bevægelse på skolen? - Adgang til bad
s_53	Kan du finde på at vælge motion og bevægelse fra på grundforløb 1 fordi, at du ikke vil svede?
s_40	Hvad passer bedst som beskrivelse af din bevægelse og motion i fritiden?
s_38	Hvordan vurderer du din fysiske form?
s_39	Vil du gerne lave mere bevægelse og motion?
s_17	Hvor godt vurderer du, at du generelt klarer dig i skolen?
s_26	I hvor høj grad er du glad for at gå på grundforløb 1?
s_25	Ryger du?
s_43	Ved du hvilket hovedområde du går på?
s_55	Ved du hvilket hovedområde du går på? - Nej - jeg ved ikke hvilket hovedområde, jeg er tilknyttet (skriv gerne hvad din uddannelse hedder)
s_44	Hvilken skole går du på? (fx Aalborg Tech, SOSU Aarhus...)
stato_1	Samlet status - Ny
stato_2	Samlet status - Distribueret
stato_3	Samlet status - Nogen svar
stato_4	Samlet status - Gennemført
stato_5	Samlet status - Frafaldet
c_1
c_2
c_3
c_4	antal minutters motion
c_5	Kategori - Alder

## Sheet: Dataset
s_14	s_15	s_1	s_35_1	s_35_2	s_35_3	s_35_4	s_35_5	s_35_6	s_2	s_18	s_21	s_22	s_23	s_24	s_45	s_32	s_33	s_42	s_47	s_48	s_49	s_50	s_52	s_52_1	s_52_2	s_52_3	s_54	s_53	s_40	s_38	s_39	s_17	s_26	s_25	s_43	s_55	s_44	stato_1	stato_2	stato_3	stato_4	stato_5	c_1	c_2	c_3	c_4	c_5
2	17	15	0	0	1	0	0	1	Nogle gange i timerne	6	5	5	3	5	6	3	1	5	4	6	6	4	3	6	5	6	6	4	3	3	3	3	4	1	2		Aalborg tech	0	0	0	1	0				2	4
1	17	20	0	0	1	1	1	0		2	2	3	2	5	2	5	2	1	5	2	3	3	1	4	1	2	2	2	2	2	2	2	2	1	5		Skive Tekniske Skole	0	0	0	1	0				2	4
			0	0	0	0	0	0																														0	1	0	0	0
1	17	20	0	0	1	1	0	0		1	1	3	2	2	3	3	2	1	2	2	2	2	2	3	2	2	1	1	2	2	1	3	3	1	2		sosu vejle	0	0	0	1	0				2	4
2	17	15	0	1	0	0	0	0		3	2	4	2	5	2	3	4	3	4	2	3	2	2	2	3	5	5	1	2	2	2	1	2	1	2		Aalborg tech	0	0	0	1	0				2	4
1	17	35	0	1	0	1	1	0		2	1	1	1	5	3	5	5	1	1	1	1	1	6	1	1	1	6	2	3	4	1	3	1	1	5		euc nord	0	0	0	1	0				3	4
2	17	40	0	1	0	1	1	0		3	3	3	3	3	3	3	3	3	3	3	3	3	2	2	2	2	2	2	2	2	1	2	2	5	2		EUC Nord	0	0	0	1	0				3	4
1	16	30	0	0	1	0	0	0		1	1	1	1	6	1	5	4	1	4	1	1	1	1	2	1	6	1	4	4	4	1	2	1	1	5		Skive teknisk skole	0	0	0	1	0				3	3
			0	0	0	0	0	0																														0	1	0	0	0
2	16	10	0	1	1	0	0	0		3	4	5	2	4	3	2	5	3	1	1	3	2	3	4	4	5	5	2	4	5	2	1	3	2	2		Aalborg tech	0	0	0	1	0				1	3
			0	0	0	0	0	0																														0	1	0	0	0
1	16	45	0	1	0	1	0	0		3	3	3	3	3	3	3	3	3	3	3	3	3	2	2	2	2	2	1	2	2	1	1	2	5	2		Eucnord	0	0	0	1	0				4	3
1	17	15	0	0	1	0	0	0		5	5	5	4	5	5	2	5	4	5	5	5	5	2	4	4	4	4	2	2	2	2	1	3	1	2		Aalborg tech	0	0	0	1	0				2	4
1	18	35	0	0	1	0	0	0		4	3	2	2	5	4	5	5	1	1	4	2	4	2	3	2	4	3	2	3	3	1	2	3	1	5		Skive teknisk skole	0	0	0	1	0				3	5
1	18	15	0	0	0	0	1	0		3	1	2	2	3	2	3	4	2	2	3	3	2	3	3	6	4	5	2	1	1	2	3	4	1	5		EUC HOLBÆK	0	0	0	1	0				2	5
1	17	5	1	0	0	0	0	0		5	4	5	3	4	5	5	3	3	2	2	1	2	2	3	3	6	3	2	1	2	2	3	3	1	5		EUC nordvestsjælland	0	0	0	1	0				1	4
2	18	20	1	1	0	0	0	0		1	1	3	1	3	2	5	4	1	2	1	2	2	1	1	1	3	1	1	3									0	0	1	0	0				2	5
2	17	10	0	0	1	0	0	0		4	4	4	4	4	4	3	4	4	4	2	2	2	5	4	5	5	4	1	3	4	1	2	4	3	2		Aalborg tech College	0	0	0	1	0				1	4
2	17	20	0	0	1	1	0	0		5	4	5	3	4	3	5	3	3	4	2	1	3	2	5	2	2	3	1	3	3	2	1	3	1	2		SOSU - Vejle	0	0	0	1	0				2	4
2	17	20	0	0	1	1	0	0		5	4	4	3	4	3	5	3	3	4	2	1	3	2	5	2	2	3	1	3									0	0	1	0	0				2	4
2	17	10	0	1	0	0	0	1	idrætsdage	2	2	3	2	4	4	4	3	3	2	1	1	2	2	3	2	6	6	3	3	3	1	2	2	1	6	mediegrafiker	Aarhus Tech dollerupvej	0	0	0	1	0				1	4
2	17	30	0	0	1	1	1	0		3	6	2	2	6	6	5	4	2	1	1	1	1	2	3	2	2	6	2	3	3	1	2	2	2	2		SOSU Vejle	0	0	0	1	0				3	4
1	17	60	0	0	1	0	0	0		3	3	3	2	3	1	4	4	1	3	3	3	3	2	1	2	2	1	2	3	3	1	1	2	1	5		Skive teknisk skole	0	0	0	1	0				4	4
2	18	10	0	0	1	0	0	0		2	3	6	6	5	6	4	6	1	6	6	6	6	6	6	6	6	6	3	2	2	1	2	6	3	2		Aalborg tech	0	0	0	1	0				1	5
			0	0	0	0	0	0																														0	1	0	0	0
1	17	15	0	0	1	1	1	0		2	1	3	2	3	2	3	5	1	2	4	4	2	4	2	5	2	5	2	3	4	3	3	3	1	5		Skive Tekniske Skole	0	0	0	1	0				2	4
1	19	35	1	1	1	0	0	0		4	3	6	6	3	3	4	1	6	2	3	3	3	2	3	3	3	1	4	4	3	3	3	2	5	4		Aalborg Tech	0	0	0	1	0				3	6
2	17	15	0	0	1	0	0	0		3	5	4	4	3	1	4	1	3	4	3	1	4	3	3	3	3	3	3	3	3	1	1	1	1	2		SOSU Vejle	0	0	0	1	0				2	4
1	18	5	0	0	0	0	0	1	Idrætsdag	6	6	6	1	6	6	6	6	3	2	2	2	2	6	6	6	6	6	4										0	0	1	0	0				1	5
1	18	30	0	0	1	1	0	0		2	2	2	2	3	2	5	3	2	2	2	2	2	2	2	2	6	6	2	1	2	1	3	1	2	5		Skive teknisk skole	0	0	0	1	0				3	5
1	17	60	1	0	1	0	0	1	Idrætsdage	1	1	1	1	1	1	4	5	2	3	3	3	5	6	6	6	6	6	2	1	1	3	3	3	2	5		Aarhus tech	0	0	0	1	0				4	4
1	17	20	0	0	1	0	0	0		3	3	4	2	5	4	5	4	2	3	5	2	2	1	4	2	6	3	2	1	2	2	3	2	1	5		Skive	0	0	0	1	0				2	4
2	18	15	0	0	1	0	0	0		3	2	3	2	3	2	5	3	3	3	3	3	4	2	3	2	2	3	2	3	3	1	2	1	1	2		SOSU Vejle	0	0	0	1	0				2	5
1	16	60	0	1	1	0	0	0		3	6	3	2	5	3	4	6	3	6	6	3	6	3	4	4	2	3	2	3	3	3	3	2	1	5		Skive tekniske skole	0	0	0	1	0				4	3
1	17	5	0	1	0	0	0	0		5	5	5	1	5	5	5	5	1	5	5	1	1	4	4	3	6	5	2	3	2	2	1	1	1	5		EUC Nord Frederikshavn	0	0	0	1	0				1	4
2	57	60	1	1	1	1	1	0		3	5	4	4	1	4																							0	0	1	0	0				4
2	17	15	0	0	1	0	0	0		2	6	4	1	2	3	6	3	2	2	4	4	2	2	2	2	2	2	2	3	4	1	4	2	1	2		SOSU Vejle	0	0	0	1	0				2	4
1	17	5	0	0	0	1	0	0		2	6	5	6	4	3	6	6	3	6	6	3	3	6	2	2	2	2	2	4	3	1	2	3	1	6	indrustriteknikker	AARHUS TECH	0	0	0	1	0				1	4
1	16	15	0	0	1	1	0	0		3	3	3	1	5	3	4	4	2	3	3	5	5	3	2	3	6	6	2	4	4	2	2	1	1	5		Skive Tekniske Skole	0	0	0	1	0				2	3
1	17	50	1	0	1	1	0	0		2	3	2	2	2	2	5	5	2	2	2	2	2	2	2	2	2	3	2	3	3	3	2	2	2	2		SOSU Horsens	0	0	0	1	0				4	4
1	18	40	0	0	1	0	0	0		2	2	1	1	3	2	5	5	2	2	3	1	2	1	3	2	1	3	2	2	2	1	2	2	1	2		Sosu vejle	0	0	0	1	0				3	5
2	18	20	0	0	1	0	0	0		4	1	5	1	5	4	5	5	1	2	1	1	4	2	6	6	6	6	1	3	5	3	2	1	4	2		Revy college	0	0	0	1	0				2	5
2	17	15	1	1	1	1	0	0		2	2	3	1	2	1	4	5	2	2	1	1	2	2	6	3	6	6	3	3	4	1	2	1	1	2		Aarhus Tech	0	0	0	1	0				2	4
1	18	15	0	1	1	0	0	0		2	1	1	2	5	5	5	2	1	3	2	2	2	1	1	2	5	3	3	3	4	1	2	4	3	4		Agri College	0	0	0	1	0				2	5
1	18	40	0	1	0	0	0	0		2	3	2	2	4	2	5	5	1	2	2	2	2	2	2	2	5	3	2	3	2	1	3	2	1	4		Agri College Aalborg	0	0	0	1	0				3	5
			0	0	0	0	0	0																														0	1	0	0	0
2	18	55	1	0	1	0	0	0		6	3	3	2	5	6	6	4	3	3	2	2	3	6	4	4	6	4	3	3	3	3	3	4	1	4		Tech College, Aalborg - FOOD	0	0	0	1	0				4	5
1	18	20	0	1	0	1	0	0		2	1	1	1	1	3	5	4	1	2	1	1	1	3	1	1	4	1	2	2	2	1	2	1	1	4		aalborg tech	0	0	0	1	0				2	5
2	17	20	0	1	0	1	1	0		3	4	3	3	3	3	4	3	3	3	3	3	3	2	2	2	6	6	2	4	4	3	3	2	5	2		Aalborg Tech	0	0	0	1	0				2	4
			0	0	0	0	0	0																														0	1	0	0	0
1	18	50	1	1	1	1	0	0		1	2	1	2	3	2	6	4	1	6	2	1	6	3	3	3	6	6	3	3	4	1	3	3	2	5		Euc Nordvestsjælland	0	0	0	1	0				4	5
1	18	25	0	1	0	0	0	0		2	4	4	4	3	3	5	3	3	4	4	3	3	4	4	4	6	6	4	4	4	2	2	3	2	4		celf nykøbing f	0	0	0	1	0				2	5
2	16	40	0	0	1	0	0	0		4	3	4	4	4	4	3	4	4	3	5	4	5	3	3	3	3	5	2	2	3	2	2	2	3	2		Aalborg tech college	0	0	0	1	0				3	3
2	17	30	0	0	1	0	0	0		2	2	2	2	4	3	5	5	2	3	3	3	3	4	3	3	4	3	2	4	3	2	2	2					0	0	1	0	0				3	4
1	17	30	0	0	0	1	0	0		2	2	2	2	2	2	5	5	2	2	2	2	5	3	2	3	3	5	3	2	2	1	2	3	2	4		Nyk.f	0	0	0	1	0				3	4
2	17	20	0	0	0	0	0	1	Hjj	6	6	6	6	6	6	6	6	6	6	6	6	6	6	6	6	6	6	4	1	2	3	2	6	1	2		Hk	0	0	0	1	0				2	4
			0	0	0	0	0	0																														0	1	0	0	0
1	17	5	1	0	0	0	0	0		3	5	5	3	5	3	3	2	3	4	2	2	2	3	3	3	4	6	1	4	5	3	2	4	1	5		Aarhus Tech	0	0	0	1	0				1	4
			0	0	0	0	0	0																														0	1	0	0	0
1	17	5	1	0	0	0	0	0		3	4	3	3	4	2	5	4	3	5	5	4	3	2	3	3	5	5	2	2	4	2	3	2	1	5		EUC NVS	0	0	0	1	0				1	4
2	19	5	0	0	1	0	0	1	5 min midt i timen	5	4	4	3	5	4	3	2	4	4	4	4	4	2	3	2	5	5	3	3	3	3	3	3	1	2		Aalborg Tech	0	0	0	1	0				1	6
			0	0	0	0	0	0																														0	1	0	0	0
1	18	15	0	0	1	0	0	0		2	2	2	2	2	2	5	5	2	2	2	2	3	2	2	2	2	2	2	2	3	1	3	2	1	5		Skive teknisk skolen	0	0	0	1	0				2	5
1	17	10	1	0	0	1	0	0		5	4	3	5	5	5	4	3	1	3	6	3	4	3	3	3	4	6	3	4	1	2	3	2	1	5		Den her	0	0	0	1	0				1	4
			0	0	0	0	0	0																														0	1	0	0	0
			0	0	0	0	0	0																														0	1	0	0	0
			0	0	0	0	0	0																														0	1	0	0	0
			0	0	0	0	0	0																														0	1	0	0	0
1	16	5	0	1	0	0	0	0		3	2	2	2	4	3	3	2	3	2	2	2	2	3	4	2	5	3	1	4	4	3	2	2	1	5		CELF Nykøbing F.	0	0	0	1	0				1	3
1	16	60	0	0	1	0	0	0		1	6	3	3	4	3	4	2	3	5	2	4	1	2	1	4	5	5	2	3	3	2	3	1	1	5		Århus tech	0	0	0	1	0				4	3
			0	0	0	0	0	0																														0	1	0	0	0
1	18	30	1	0	1	0	0	0		3	3	3	3	3	3	5	5	3	1	1	1	1	1	1	1	4	4	2	3	3	1	2	1	3	4		Tech college	0	0	0	1	0				3	5
1	18	10	0	1	0	0	0	0		2	1	1	1	3	2	5	5	1	3	2	1	3	4	4	4	4	5	2	3	3	1	2	4	1	4		Celf Nykøbing F	0	0	0	1	0				1	5
1	17	10	0	1	0	0	0	0		6	5	5	1	6	3	6	3	1	1	1	4	2	3	2	3	6	6	2	4	4	3	2	2	3	5		Celf Nykøbing f	0	0	0	1	0				1	4
1	18	35	0	1	0	0	0	0		2	2	2	2	3	2	5	2	4	2	2	1	3	2	6	1	6	1	2	1	2	1	2	1	3	4			0	0	0	1	0				3	5
1	17	15	1	1	0	0	0	0		5	5	5	5	5	5	5	5	5	5	5	5	5	5	5	5	5	5	1	4	5	2	5	5	5	4		Aarhus tech	0	0	0	1	0				2	4
1	17	10	0	1	0	0	0	0		2	2	3	2	3	3	5	5	1	3	4	2	2	6	2	6	6	6	2	3	3	1	1	3	3	5		EUC syd Sønderborg	0	0	0	1	0				1	4
			0	0	0	0	0	0																														0	1	0	0	0
1	16	25	1	1	0	1	0	0		2	3	2	2	3	3	5	5	3	3	3	2	3	2	3	2	6	6	2	1	3	1	1	2	3	5		EUC syd sønderborg	0	0	0	1	0				2	3
1	17	0	0	0	0	0	1	0																														0	0	1	0	0				1	4
1	17	5	0	0	1	1	0	0		2	1	1	1	4	3	5	5	1	2	2	2	1	2	1	1	1	2	2	3	3	1	3	1	2	5		Skive teknisk skole	0	0	0	1	0				1	4
1	17	40	0	0	0	0	0	1	Lavede noget i timerne	3	2	2	2	3	1	4	3	2	4	3	2	6	2	3	3	4	4	2	3	4	1	4	4	3	5		Aarhustech	0	0	0	1	0				3	4
1	17	30	1	1	0	1	1	0		3	3	6	3	4	3	5	3	3	3	6	5	3	3	3	2	2	6	3	4	3	1	3	6	1	5		EUC Nordvestsjælland	0	0	0	1	0				3	4
1	16	5	0	0	1	0	0	0		4	3	4	3	3	4	2	2	3	3	3	3	3	2	2	2	3	3	2	3	2	1	1	1	2	5		Skive Tekniske skole	0	0	0	1	0				1	3
1	16	15	0	0	1	0	0	0		3	2	2	1	4	2	4	4	1	5	2	2	2	2	3	2	6	6	2	4	2	1	3	3	2	5		Skive Tekniske Skole	0	0	0	1	0				2	3
1	16	30	0	0	1	0	1	0		1	1	1	1	3	1	5	5	1	5	5	1	1	3	4	3	4	3	2	2									0	0	1	0	0				3	3
1	18	5	0	1	0	1	0	0		3	6	3	3	6	4	5	3	3	3	2	2	2	2	3	1	3	3	1	1	3	2	2	2	1	2		Sosu Esbjerg	0	0	0	1	0				1	5
1	17	45	0	0	1	0	0	0		2	3	3	2	2	2	2	4	2	4	2	2	2	3	3	4	2	2	2	3	3	3	3	4	2	5		SkiveTS	0	0	0	1	0				4	4
1	18	20	0	0	1	0	0	0		3	3	3	3	3	3	3	3	3	1	3	1	6	5	1	1	1	6	2	4	3	1	3	5	5	5		bornholms erversskole	0	0	0	1	0				2	5
1	18	30	0	0	1	0	0	0		5	3	5	4	5	4	3	2	4	3	2	2	3	2	2	3	5	4	1	3	4	2	2	2	2	5		Skive Teknisk Gymnasium	0	0	0	1	0				3	5
1	17	60	0	0	1	1	1	0		3	3	4	3	5	3	4	3	3	3	3	3	4	3	2	2	3	2	1	3	3	1	2	1	1	5		Skive ts	0	0	0	1	0				4	4
			0	0	0	0	0	0																														0	1	0	0	0
1	17	5	1	0	0	0	0	0		3	4	5	4	5	5	3	3	5	4	5	5	5	6	6	6	6	6	4	1	3	2	2	2	2	5		Aarhus tech	0	0	0	1	0				1	4
1	17	20	0	1	0	1	0	0		2	2	3	3	4	3	3	1	2	1	1	1	2	1	2	2	5	4	2	3	2	2	2	2	4	5		CELF Nykøbing Falster	0	0	0	1	0				2	4
1	17	60	0	0	1	1	1	0		1	1	1	1	3	1	4	2	1																				0	0	1	0	0				4	4
1	17	15	0	0	1	0	0	0		2	6	2	2	4	2	5	5	2	1	1	1	2	2	3	2	3	5	2	3	3	1	2	2	1	5		Frederikshavn EUC Nord	0	0	0	1	0				2	4
1	17	20	0	1	0	0	0	0		2	3	2	3	3	2	5	4	2	2	3	2	2	3	3	3	4	3	2	1	3	1	3	2	1	5		CELF Nykøbing falster	0	0	0	1	0				2	4
1	18	30	0	0	1	0	0	0		3	6	1	6	6	1	5	6	1	1	1	1	1	6	6	6	6	6	2	1	2	1	1	3	1	5		euc nordvestsjælland	0	0	0	1	0				3	5
1	17	5	0	0	0	1	1	1	en gang om ugen hvor vi gik 30 min som det eneste	1	2	1	1	2	1	5	1	1	5	5	5	5	4	2	3	5	5	2	3	3	1	2	3	2	6	Biler, teknologi og industreiel design	Mercantec viborg	0	0	0	1	0				1	4
			0	0	0	0	0	0																														0	1	0	0	0
2	16	30	0	0	1	1	1	0		2	3	2	2	3	2	4	4	2	2	2	2	2	1	1	3	4	1	1	3	2	1	1	2	1	4		Agri College TECHCOLLEGE	0	0	0	1	0				3	3
1	17	60	0	1	0	0	0	0		2	3	4	3	4	1	3	3	3	4	1	3	4	3	3	3	5	6	3	1	1	1	2	3	1	5		celf nykøbing	0	0	0	1	0				4	4
1	16	15	0	1	0	0	0	0		3	3	3	1	5	4	5	5	1	1	5	5	5	2	2	2	5	2	2	4	3	3	2	2	1	5		CELF Kringelborg allé, Nykøbing F	0	0	0	1	0				2	3
1	18	60	0	0	0	0	1	0		2	4	3	3	5	2	5	4	3	3	2	4	2	5	4	5	1	1	3	1	1	2	2	4	1	5		Århus tech	0	0	0	1	0				4	5
			0	0	0	0	0	0																														0	1	0	0	0
1	17	20	0	1	1	0	0	0		2	2	2	2	5	5	5	2	2	4	2	2	2	3	3	5	5	4	2	4	3	1	2	1	1	6	Lastvogns mekaniker	CELF	0	0	0	1	0				2	4
1	16	10	0	1	0	1	0	0		2	3	3	3	3	2	4	4	2	3	3	2	3	2	2	2	2	6	2	1	2	1	3	3	2	5		CELF nyk.F	0	0	0	1	0				1	3
1	16		0	0	0	0	0	0																														0	0	1	0	0					3
1	16	20	0	1	0	0	0	0																														0	0	1	0	0				2	3
2	16	40	1	0	0	0	1	0		2	4	3	3	3	3	3	3	3	3	3	2	3	3	3	2	6	6	2										0	0	1	0	0				3	3
1	16	20	0	1	0	0	0	0		1	2	3	2	5	2	5	4	3	2	3	2	2	2	2	2	6	2	3	3	4	3	2	3	4	5		celf	0	0	0	1	0				2	3
2	16	30	0	0	1	0	0	0		3	6	5	3	6	3	4	4	2	4	2	2	4	2	4	2	6	2	2	4	4	1	3	4	1	5		Syddansk Erhvervsskole Vejle	0	0	0	1	0				3	3
2	17	15	1	0	0	1	0	0		1	3	2	1	3	1	5	5	1	2	2	1	3	1	3	2	3	3	2	3	3	1	2	2	1	2		Sosufyn	0	0	0	1	0				2	4
1	16	45	0	0	1	0	0	0		4	4	4	4	4	4	4	4	4	3	3	3	3	3	3	3	3	3	1	3	2	3	6	6	3	5		Skive	0	0	0	1	0				4	3
			0	0	0	0	0	0																														0	1	0	0	0
			0	0	0	0	0	0																														0	1	0	0	0
2	18	45	0	1	1	0	0	0		1	1	3	1	5	3	5	5	1	3	2	2	2	3	1	3	1	1	1	3	2	1	3	2	5	2		Sosu	0	0	0	1	0				4	5
1	17	15	0	1	0	0	0	0		5	5	5	3	5	5	4	2	3	3	3	3	3	3	4	3	4	4	2	4	5	3	3	4	5	5		celf kringelborg	0	0	0	1	0				2	4
			0	0	0	0	0	0																														0	1	0	0	0
			0	0	0	0	0	0																														0	1	0	0	0
			0	0	0	0	0	0																														0	1	0	0	0
			0	0	0	0	0	0																														0	1	0	0	0
1	17	20	0	1	0	1	0	0		2	1	2	1	4	3	5	5	1	4	2	1	3	2	1	2	6	6	2	2	2	1	2	2	1	4		CELF Nyk.F	0	0	0	1	0				2	4
1	16	5	0	0	0	0	0	1	Vi har spillet fodbold i timen hvis der ik har være noget at lave	1	1	1	1	4	1	5	1	1	3	3	2	5	1	3	2	6	5	2	3	4	1	2	2	4	4		Aarhus tech	0	0	0	1	0				1	3
			0	0	0	0	0	0																														0	1	0	0	0
2	17	60	0	0	0	0	0	1	Når vi havde sundhedsfremme	1	1	1	1	2	1	5	5	1	3	4	2	1	3	1	1	2	2	2	3	5	1	3	1	2	2		SOSU Fyn	0	0	0	1	0				4	4
			0	0	0	0	0	0																														0	1	0	0	0
2	16	15	0	1	0	0	0	0		1	3	2	1	2	2	4	5	1	2	1	1	2	5	2	5	1	4	2	1	1	1	2	2	1	4		Aarhus tech	0	0	0	1	0				2	3
1	17	15	0	1	0	0	0	0		1	3	3	3	4	3	5	3	3	3	3	3	3	3	3	3	3	3	3	3	4	3	1	1	1	4		Agri College Aalborg	0	0	0	1	0				2	4
2	16	15	0	0	0	0	0	1	engang i mellem når læreren syntes	1	2	2	1	4	3	2	3	2	1	1	1	1	4	1	2	3	3	1	3	3	1	3	2	1	2		sosu fyn dalum	0	0	0	1	0				2	3
2	16	20	1	0	0	0	0	0		3	2	2	1	4	3	4	5	2	4	3	3	3	2	1	2	3	3	2	3	4	1	3	1	1	4		Aarhus Tech	0	0	0	1	0				2	3
1	16	60	1	1	1	1	1	0		2	2	1	1	4	2	5	5	2	2	3	2	3	3	1	3	5	2	1	3	3	1	6	6	1	4		Aalborg tech	0	0	0	1	0				4	3
1	17	15	0	1	0	0	0	0		3	2	4	2	5	4	5	4	3	5	4	4	3	2	3	2	6	6	2	2	4	1	1	2	2	5		celf	0	0	0	1	0				2	4
2	17	50	0	0	0	0	1	0		6	3	5	4	4	5	2	1	5	4	4	3	3	5	5	3	3	6	3	4	3	2	1	1	5	2		Sosu Odense	0	0	0	1	0				4	4
2	17	35	0	1	0	0	0	0		1	1	1	1	3	2	5	2	1	4	3	4	3	1	2	2	1	4	2	4	4	3	3	2	1	2		Sosu Esbjerg	0	0	0	1	0				3	4
1	18	45	0	0	1	0	0	0		1	4	6	6	4	4	3	3	3	3	3	3	6	1	2	1	2	2	2	2	2	2	2	1	1	5		Skive tekniske skole	0	0	0	1	0				4	5
2	18	30	0	1	1	0	0	0		1	1	1	1	3	1	5	5	1	3	6	2	1	1	1	1	1	5	2	3	3	1	2	2	1	2		SOSU-skole	0	0	0	1	0				3	5
			0	0	0	0	0	0																														0	1	0	0	0
1	18	5	0	0	0	0	0	1	I timerne																													0	0	1	0	0				1	5
1	16	30	0	0	0	0	1	0		1	3	5	3	3	3	5	5	2	3	4	2	3	2	2	2	6	6	2	3	3	1	2	2	1	5		Euc	0	0	0	1	0				3	3
			0	0	0	0	0	0																														0	1	0	0	0
			0	0	0	0	0	0																														0	1	0	0	0
2	18	10	0	1	1	0	0	0		1	2	2	1	2	3	5	5	1	2	2	2	2	3	2	3	3	6	2	3	2	1	2	3	1	2		Sosu Odense	0	0	0	1	0				1	5
1	17	20	0	1	0	0	0	0		2	4	3	1	5	4	5	5	1	5	5	2	2	2	3	4	5	5	2	1	4	1	1	1	1	4		Aarhus tech	0	0	0	1	0				2	4
2	17	20	0	0	0	0	1	0		4	4	4	3	4	3	4	3	5	3	4	3	4	2	4	2	4	2	1	3	4	2	2	2	5	2		SOSU vejle	0	0	0	1	0				2	4
1	18	15	0	1	0	1	1	0		1	1	1	1	3	1	5	5	1	2	2	2	2	3	2	4	4	3	2	4	4	1	2	2	2	4		Aarhus tech	0	0	0	1	0				2	5
1	17	10	1	0	0	1	1	0		1	1	3	2	1	4	6	4	2	3	2	4	3	3	4	3	3	2	4	4	3	3	1	3	1	5		Euc	0	0	0	1	0				1	4
			0	0	0	0	0	0																														0	1	0	0	0
			0	0	0	0	0	0																														0	1	0	0	0
2	17	20	0	0	0	1	0	0		3	3	3	1	5	3	5	6	2	3	5	3	4	4	1	3	4	6	2	3	3	3	2	4	1	2		Social- og Sundhedsskolen Fyn	0	0	0	1	0				2	4
1	17	15	0	1	0	0	0	0		2	2	3	2	4	2	5	5	2	3	2	2	2	4	3	3	6	6	2	3	3	1	2	1	2	4		Aarhus tech	0	0	0	1	0				2	4
1	16	20	0	1	0	0	0	0		2	2	3	2	4	3	5	5	2	3	4	3	2	3	4	2	3	2	2	4	3	1	2	2	1	4		Aarhus tech	0	0	0	1	0				2	3
2	17	20	1	1	0	0	0	0		2	6	3	2	6	6	5	5	2	2	3	4	2	3	2	6	6	6	3	3	3	1	6	2	1	2		Sosufyn	0	0	0	1	0				2	4
1	16	20	0	0	0	0	0	1	Nogle gang i teroi	1	1	1	1	4	1	5	5	1	1	1	1	2	1	5	1	5	1	1	2	2	1	1	1	1	4		Aarhus tec	0	0	0	1	0				2	3
1	17	10	1	1	0	0	0	0		3	3	3	1	6	1	5	3	3	3	3	3	3	1	2	6	6	2	2	1	3	3	1	2	1	4		Århusb Tech	0	0	0	1	0				1	4
1	18	60	0	0	0	0	1	0		1	5	1	1	2	1	5	5	1	3	3	5	3	3	3	3	3	4	3	1	2	3	3	5	1	5		Euc	0	0	0	1	0				4	5
1	16	20	0	0	1	0	0	0		3	3	3	2	5	2	5	5	2	3	4	3	3	2	3	2	3	4	2	1	1	1	2	2	1	5		Skive teknisk skole	0	0	0	1	0				2	3
			0	0	0	0	0	0																														0	1	0	0	0
2	17	10	0	1	0	0	0	0		1	1	1	1	1	1	5	1	1	3	2	2	5	3	2	3	4	6	2	3	4	1	1	2	3	2		Sosu Esbjerg	0	0	0	1	0				1	4
			0	0	0	0	0	0																														0	1	0	0	0
2	17	5	0	0	1	0	0	0		6	6	6	6	6	6	6	6	6	1	6	1	6	6	6	6	6	6	2	3	3	3	2	2	1	2		SOSO Vejle	0	0	0	1	0				1	4
2	18	60	0	0	0	0	1	0		5	4	5	4	5	2	4	4	5	5	2	1	3	1	1	1	4	2	2	3	4	1	1	2	5	2		Sosu vejle	0	0	0	1	0				4	5
2	19	30	0	0	0	0	1	0		1	1	2	2	1	1	5	5	1	2	2	2	2	3	2	6	6	6	4	1	2	1	2	2	1	2		SOSU Esbjerg	0	0	0	1	0				3	6
2	15	5	0	0	1	0	0	0		2	2	3	2	4	4	5	5	2	6	6	6	6	6	6	6	6	6	2	2	4	1	3	6	1	2		SOSU Vejle	0	0	0	1	0				1	2
1	18	40	0	0	1	0	0	0		4	3	2	3	3	1	1	2	2	3	2	2	3	1	1	1	1	1	4	2	3	1	2	2	5	2		EUC NVS	0	0	0	1	0				3	5
2	17	10	0	0	1	1	0	1	Til tider i undervisningen.	2	4	3	3	4	5	3	3	1	2	3	1	3	3	3	3	3	3	2	2	2	3	1	2	1	2		Vejle	0	0	0	1	0				1	4
			0	0	0	0	0	0																														0	1	0	0	0
1	17	15	0	0	0	0	0	1	idræts dagende vi har haft	4	5	5	5	5	4	4	4	3	4	2	2	3	3	2	2	2	3	1	4	4	3	2	3	1	5		aarhus tech	0	0	0	1	0				2	4
			0	0	0	0	0	0																														0	1	0	0	0
1	17	45	0	1	0	1	0	0		2	1	1	1	1	1	6	6	1	3	3	3	3	2	2	6	6	2	4	4									0	0	1	0	0				4	4
			0	0	0	0	0	0																														0	1	0	0	0
1	17	45	0	0	0	0	0	1	ca heletiden	3	2	2	1	1	1	6	6	2	2	3	2	1	2	3	2	2	5	4	3	2	1	1	1	3	5		eucnvs	0	0	0	1	0				4	4
2	17	15	0	1	0	0	0	0		1	2	1	1	4	3	5	5	1	2	3	1	3	1	1	1	1	6	3	4	5	3	3	2	2	2		Odense	0	0	0	1	0				2	4
			0	0	0	0	0	0																														0	1	0	0	0
1	16	20	1	0	1	1	0	0		3	3	3	3	3	3	3	3	3	3	2	1	5	1	1	1	6	6	2	4	3	2	2	2	1	5		Skivetekniskeskole	0	0	0	1	0				2	3
1	16	30	1	0	0	0	0	0		2	2	2	2	3	2	3	3	2	3	3	3	3	4	3	4	3	4	3	2	2								0	0	1	0	0				3	3
2	17	20	1	1	1	0	0	0		2	2	2	2	2	3	4	3	2	3	2	2	2	2	2	3	2	2	3	4	4	1	2	1	1	2		Tech College	0	0	0	1	0				2	4
1	17	60	0	0	0	1	0	0		3	2	3	2	4	3	5	4	2	5	5	3	3	3	3	3	6	6	2	3	3	1	2	2	2	5		Aarhus tech	0	0	0	1	0				4	4
1	16	10	0	0	0	1	0	0		6	5	5	6	6	5	6	6	6	6	6	6	6	3	3	3	3	5	3	1	2	3	2	2	1	5		Euc syd	0	0	0	1	0				1	3
1	19	10	0	0	0	0	1	0		1	1	1	1	1	1	1	1	1	1	1	1	1	1	1	1	1	1	2	1	2	2	1	1	3	5		euc nord	0	0	0	1	0				1	6
1	16	0	0	0	0	0	1	0																														0	0	1	0	0				1	3
1	17	0	1	0	0	0	0	0		3	3	3	3	3	3	5	5	3	3	3	3	3	2	6	2	6	6	2	3	4	1	3	2	1	5		Sønderborg	0	0	0	1	0				1	4
2	17	0	0	0	1	1	1	0																														0	0	1	0	0				1	4
1	16	10	0	1	0	0	0	0		5	2	2	5	5	5	5	5	2	6	6	5	6	6	2	6	5	5	4	4	5	3	6	2	1	4		celf nyk.f	0	0	0	1	0				1	3
1	17	5	0	0	0	1	0	0		4	5	5	6	5	3	6	4	4	4	3	2	4	4	2	3	5	5	1	3	4	1	2	2	5	5		EUC Nordvestsjælland	0	0	0	1	0				1	4
1	16	10	1	0	0	0	0	0		6	5	5	5	5	4	5	4	3	4	6	5	3	1	5	3	6	5	2	3	2	2	3	3	1	5		EUC Syd Sønderborg	0	0	0	1	0				1	3
2	17	15	0	1	0	0	0	0		3	4	3	3	5	3	3	1	3	2	2	1	2	2	2	2	3	3	1	3	4	2	3	3	2	4		Aarhus Tech	0	0	0	1	0				2	4
			0	0	0	0	0	0																														0	1	0	0	0
2	17	0	0	1	0	0	0	0		6	6	6	6	6	6	6	6	6	6	6	6	6	6	6	6	6	6	4	4	3	3	2	2	1	2		Tech college	0	0	0	1	0				1	4
			0	0	0	0	0	0																														0	1	0	0	0
1	17	10	0	1	0	1	0	0		3	3	4	3	5	6	4	3	3	3	3	4	3	3	2	2	5	5	2	4	4	3	2	3	1	4		CELF Nykøbing F	0	0	0	1	0				1	4
2	18	0	1	0	0	1	0	0		3	3	3	5	2	2	3	3	4	4	3	1	2	4	4	4	4	4	1	3	2	1	1	1	5	2		århus tech	0	0	0	1	0				1	5
			0	0	0	0	0	0																														0	1	0	0	0
2	16	60	1	1	1	0	0	0		2	2	2	2	3	2	2	2	2	2	2	2	2	1	1	1	2	2	2	2	2	1	2	3	2	2		EUC	0	0	0	1	0				4	3
1	18	40	0	1	0	0	0	0		6	6	6	6	6	6	6	6	6	1	1	1	1	1	1	1	1	6	3	2	3	3	3	1	2	5		Euc	0	0	0	1	0				3	5
			0	0	0	0	0	0																														0	1	0	0	0
2	17	45	1	1	1	1	1	1	Bevægelse inden pause i 15 min	2	2	2	1	2	2	3	2	2	3	3	3	2	2	2	3	6	5	3	3	3	1	2	1	5	2		Tech College	0	0	0	1	0				4	4
2	16	15	0	0	1	0	1	0		1	2	2	1	3	2	5	5	1	3	2	3	2	2	2	1	1	2	2	3	3	1	2	2	2	2		SOSU Fredericia- Vejle- Horsens	0	0	0	1	0				2	3
			0	0	0	0	0	0																														0	1	0	0	0
1	19	30	1	0	0	0	0	0		5	5	5	5	5	5	1	1	5	1	1	3	3	3	4	3	4	5	1	2	4	1	4	3	2	5		Aarhus tech	0	0	0	1	0				3	6
1	17	30	1	1	0	0	0	0		2	4	3	3	3	2	2	3	4	3	2	2	2	1	2	2	6	6	3	4	3	1	2	2	4	5		EUC Sønderborg	0	0	0	1	0				3	4
1	17	5	0	0	1	0	0	0		1	1	1	2	5	3	5	2	1	3	3	3	3	4	3	5	4	5	3	1	1	1	1	2	1	5		EUC Nord	0	0	0	1	0				1	4
2	18	20	0	1	0	1	0	0		3	5	4	3	4	5	4	4	3	2	2	2	2	4	4	4	4	4	1	3	3	1	3	3	3	6	Aalborg Tech	Aalborg Tech	0	0	0	1	0				2	5
1	17	15	1	0	0	0	0	0		3	4	4	3	5	6	6	4	4	2	2	2	2	5	3	3	5	3	3	3	3	1	3	2	1	5		EUC Sønderborg	0	0	0	1	0				2	4
2	18	15	0	1	0	0	0	1	Ung i Danmark	1	1	3	1	2	2	5	5	1	2	2	1	1	3	2	2	6	2	2	3	3	1	1	1	1	4		Nykøbing F	0	0	0	1	0				2	5
2	17	10	0	1	0	0	0	0		4	3	2	2	2	3	4	2	3	3	3	3	3	1	4	4	6	6	2	2	2	1	2	1	2	6	Alborg tech	Alborg tech	0	0	0	1	0				1	4
2	12	0	0	0	0	0	0	1	Aldrig kun når jeg bliver misbrugt på toilettet	6	6	6	6	6	6	6	6	6	6	6	6	6	6	6	6	6	6	4	4	1	3	6	6	5	6	ved det ikke	EUC	0	0	0	1	0				1
1	17	10	1	0	0	1	1	0		5	2	3	1	5	5	3	3	4	5	5	5	5	5	4	4	5	4	3	3	3	2	2	2	3	5		frede	0	0	0	1	0				1	4
2	17	20	0	0	1	1	1	0		2	4	4	3	3	3	5	4	4	3	3	3	3	2	3	3	3	3	2	1	2	1	2	2	1	2		Sosu Vejle	0	0	0	1	0				2	4
1	16	10	0	1	0	0	1	0		2	5	5	5	5	5	1	1	4	2	2	5	5	5	1	1	5	5	2	1	5	2	1	3	1	5		Mercantec Viborg	0	0	0	1	0				1	3
2	19	25	0	0	1	1	0	0		1	1	3	1	1	1	4	6	3	1	1	1	3	3	1	1	1	1	1	3	2	3	1	1	1	2		SOSU vejle	0	0	0	1	0				2	6
1	16	5	0	0	0	0	1	0		3	2	4	3	5	3	4	3	2	2	1	1	2	2	5	5	5	3	2	4	4	1	3	2	1	5		Aarhus tech	0	0	0	1	0				1	3
			0	0	0	0	0	0																														0	1	0	0	0
1	17	30	0	0	0	0	1	0		2	2	3	2	5	2	5	3	3	3	3	3	3	5	5	5	5	5	3	1	2	1	2	5	1	5		frederikshavn	0	0	0	1	0				3	4
1	18	5	0	0	0	1	0	0		6	6	3	3	6	4	6	5	6	6	5	3	6	3	6	6	6	6	4	4	3	3	3	2	4	5		EUC	0	0	0	1	0				1	5
1	18	0	0	0	0	1	0	0		6	6	6	6	6	2	6	6	4	6	6	6	6	6	6	6	6	6	4	3	3	3	3	1	1	5		Aarhus Tech	0	0	0	1	0				1	5
1	18	5	1	0	0	0	0	1	Idrætsdag	3	6	6	3	6	2	6	6	3	6	5	3	5	2	2	3	6	6	3	2	2	3	3	3	2	5		Aarhus tech	0	0	0	1	0				1	5
2	17	60	0	0	1	0	0	0		3	5	6	6	5	3	4	1	4	2	2	2	1	3	6	6	6	3	2	4	3	2	1	2	4	4		Tech college	0	0	0	1	0				4	4
1	18	30	0	1	0	0	0	0		2	2	2	2	2	2	2	4	2	4	2	2	2	4	4	4	4	4	2	1	2	1	1	1	1	2		1	0	0	0	1	0				3	5
2	17	5	0	1	0	0	0	1	Men sjældent	1	2	2	1	3	3	3	1	1	4	1	5	2	1	2	2	3	3	2	4	4	1	2	2	1	2		Sosu Esbjerg	0	0	0	1	0				1	4
2	19	45	0	0	1	0	0	0		4	5	6	3	5	1	4	1	5	2	1	1	1	2	2	2	3	6	1	1	1	3	2	1	1	2		Tech	0	0	0	1	0				4	6
1	16	10	0	1	0	0	0	0		2	2	3	1	5	3	5	6	3	3	3	2	4	4	2	3	4	6	4	3	4	3	2	3	5	5		EUC NORD frederikshavn	0	0	0	1	0				1	3
2	17	35	0	1	0	1	0	0		3	3	4	2	3	2	4	4	3	2	3	1	3	2	2	2	6	6	2	3	3	1	1	1	1	2		Aarhus Tech, trends og medie	0	0	0	1	0				3	4
2	17	5	0	0	1	0	0	0		4	4	6	6	4	2	6	6	3	6	6	6	6	6	6	6	6	6	2	3	5	1	3						0	0	1	0	0				1	4
1	17	5	0	0	1	0	0	0		3	2	2	1	3	1	5	5	1	4	3	2	4	3	1	2	5	2	2	3	2	1	1	2	1	2		Horsens	0	0	0	1	0				1	4
2	17	5	1	1	1	0	1	0		4	4	4	3	3	3	3	3	4	3	2	2	2	4	3	3	4	6	3	1	2	3	2	3	1	2		Social og sundhedskolen Fyn	0	0	0	1	0				1	4
			0	0	0	0	0	0																														0	1	0	0	0
2	17	20	1	0	1	1	1	0		3	2	3	2	4	3	5	2	2	2	2	2	3	3	3	2	2	6	2	3	3	1	2	3	1	2		SOSU fredericia - vejle - horsens	0	0	0	1	0				2	4
1	17	0	0	0	0	0	0	1	Gå tur	3	4	4	3	4	5	2	3	1	3	3	3	4	5	5	5	4	1	2	3	3	2	3	3	1	5		Frederikshavn	0	0	0	1	0				1	4
2	18	60	0	0	1	1	1	0		3	4	5	3	4	4	3	4	5	3	3	2	2	3	3	2	3	3	2	3	3	2	3	4	5	2		Vejle	0	0	0	1	0				4	5
2	17	15	0	1	1	1	0	0		2	2	3	1	2	2	4	5	1	2	1	2	2	2	2	2	5	2	2	3	3	1	1	1	1	4		Aalborg Tech	0	0	0	1	0				2	4
1	17	15	0	0	1	0	0	0		3	4	4	3	4	2	4	3	2	2	2	2	3	3	3	2	3	2	2	3	3	3	1	3	3	5		Aarhus Tech	0	0	0	1	0				2	4
1	18	5	0	0	0	1	0	0		1							5	5																				0	0	1	0	0				1	5
2	18	10	1	0	0	0	0	0		6	3	2	6	3	2	5	6	3	3	3	3	2	3	1	3	6	6	2	4	3	1	2	3	1	2		Social og sundhed fyn	0	0	0	1	0				1	5
2	17	10	1	1	0	1	1	0		2	2	2	1	4	2	4	5	1	3	1	1	3	2	2	2	2	3	1	3	5	1	3	1	1	2		SOSU	0	0	0	1	0				1	4
			0	0	0	0	0	0																														0	1	0	0	0
1	17	35	1	0	1	0	0	0		1	3	1	1	1	5	5	5	1	2	2	2	1	2	4	3	2	4	2	1	3	1	2	2	1	2		Vejle	0	0	0	1	0				3	4
2	17	10	1	0	0	0	0	0		3	2	3	1	3	3	3	3	3	2	3	1	3	2	2	2	2	2	3	3	3	2	1	3	2	2		Social og sundhedsskolen Syd	0	0	0	1	0				1	4
			0	0	0	0	0	0																														0	1	0	0	0
			0	0	0	0	0	0																														0	1	0	0	0
2	16	5	0	0	1	0	0	0		6	6	6	6	6	6	6	6	6	6	6	6	6	6	6	6	6	6	4	2	1	3	6	6	1	2		Vejle	0	0	0	1	0				1	3
1	18	45	0	0	1	0	0	0		2	1	1	1	1	3	2	2	1	3	1	3	1	2	5	4	3	4	2	3	2	1	3	1	1	5		EUC FR.Havn	0	0	0	1	0				4	5
2	17	5	0	0	1	0	0	0		2	4	4	3	5	3	4	3	2	3	1	1	5	2	3	3	2	2	2	3	3	2	2	1	1	2		SOSU Vejle	0	0	0	1	0				1	4
1	16	20	0	0	0	0	0	1	gå tur	3	3	3	3	5	4	3	3	3	3	3	3	2	3	3	3	3	3	4	3	2	3	2	2	1	6	skibsmontør	EUC nord	0	0	0	1	0				2	3
2	17	0	0	1	0	0	0	0		3	3	2	2	3	2	3	3	2	2	2	2	2	1	2	2	3	2	2	3	3	3	2	2	1	2		Esbjerg	0	0	0	1	0				1	4
2	17	5	0	0	1	0	0	0		3	3	6	2	6	3	6	3	3	5	2	3	3	1	4	1	3	3	2	2	3	1	3	2	2	2		SOSU EUX vejle	0	0	0	1	0				1	4
1	17	60	0	0	1	0	1	0																														0	0	1	0	0				4	4
1	17	25	0	1	0	0	0	0		1	1	1	1	1	1	5	5	1	5	5	5	5	3	1	1	1	1	2	1	2	2	2	1	1	2		Sosu Esbjerg	0	0	0	1	0				2	4
2	17	5	0	0	0	0	0	1	Ikke rigtig noget																													0	0	1	0	0				1	4
			0	0	0	0	0	0																														0	1	0	0	0
			0	0	0	0	0	0																														0	1	0	0	0
2	17	0	0	0	1	0	0	0		6	5	5	3	5	1	5	3	2	4	5	1	5	3	4	3	3	4	2	4	3	1	1	2	1	4		Aalborg food college	0	0	0	1	0				1	4
1	17	60	0	1	0	0	0	0		2	2	1	2	4	2	5	3	1	4	1	2	1	3	2	3	5	5	3	1	1	2	1	1	2	5		Eucnvs	0	0	0	1	0				4	4
2	19	45	0	1	0	0	0	0		2	3	4	1	5	5	3	6	4	3	2	3	2	4	1	4	2	4	1	2	3	2	3	3	1	2		Sosu esbjerg	0	0	0	1	0				4	6
1	16	45	0	1	1	1	0	0		2	3	2	2	3	3	5	5	2	2	3	1	3	3	2	2	6	3	3										0	0	1	0	0				4	3
2	27	60	0	0	0	0	1	0		1	1	1	1	1	1	1	1	1	1	1	1	1	1	1	1	1	1	2	1	1	1	1	1	5	2		Ammo	0	0	0	1	0				4
			0	0	0	0	0	0																														0	1	0	0	0
			0	0	0	0	0	0																														0	1	0	0	0
1	17	10	0	0	0	1	0	0		3	4	2	4	3	2	3	4	1	3	3	3	3	2	2	2	2	3	1	3	4	3	3	5	3	4		CELF VINK	0	0	0	1	0				1	4
2	17	20	0	1	1	0	0	0		1	2	2	1	1	1	5	5	2	2	2	2	2																0	0	1	0	0				2	4
1	16	60	0	1	0	0	0	0		1	1	1	1	1	1	1	1	1	6	5	2	2	1	5	1	5	6	2	1	1	2	1	1	1	5		Holbæk euc	0	0	0	1	0				4	3
1	17	5	0	0	1	0	0	0		1	1	1	1	3	5	5	4	1	2	1	4	1	2	1	1	6	3	2	2	2	1	2	2	1	5		EUC Holbæk	0	0	0	1	0				1	4
2	19	25	1	1	1	0	0	0		2	2	2	2	2	2	4	4	2	1	5	1	1	2	2	2	1	3	2	2	3	1	2	2	4	2		Sosu Aarhus	0	0	0	1	0				2	6
			0	0	0	0	0	0																														0	1	0	0	0
1	17	5	0	0	1	0	0	0																														0	0	1	0	0				1	4
1	16	35	1	0	0	0	1	0		3	2	3	2	4	2	5	2	1	1	3	2	2	2	3	2	6	3	2	3	2	3	3	2	3	5		Mercantec viborg	0	0	0	1	0				3	3
2	16	45	0	0	1	0	0	0		6	3	4	3	5	5	5	6	3	6	3	3	6	6	2	3	3	6	2	4	4	1	2	3	1	5		Aarhus Tech	0	0	0	1	0				4	3
			0	0	0	0	0	0																														0	1	0	0	0
1	18	20	0	1	1	0	0	0		2	1	3	1	3	1	5	4	2	3	2	3	2	2	2	2	4	2	2	3	3	1	3	2	4	4		Aarhus tech, kokkenlingen	0	0	0	1	0				2	5
1	17	30	0	0	1	0	0	0		2	3	1	1	3	2	5	5	1	2	3	3	2	3	3	3	3	2	2	3	3	1	3	2	1	5		Skive Teknisk Skole	0	0	0	1	0				3	4
1	17	0	0	0	0	0	0	1	intet	6	6	6	6	6	6	6	6	6	6	6	6	6	6	6	6	6	6	1	1	1	3	1	2	1	5		CELF Nykøbing F.	0	0	0	1	0				1	4
1	18	60	0	0	0	1	1	0		4	4	4	2	3	3	4	4	2	2	2	3	3	5	5	5	5	5	2	1	2	3	3	2	1	5		Århus tech	0	0	0	1	0				4	5
1	18	25	0	1	0	0	0	0		3	2	3	3	3	3	5	5	3	2	2	2	2	3	4	3	3	5	2	1	2	1	1	1	1	5		euc nord	0	0	0	1	0				2	5
			0	0	0	0	0	0																														0	1	0	0	0
1	17	5	1	0	0	0	0	0		2	2	2	2	2	2	5	4	2																				0	0	1	0	0				1	4
1	16	50	0	1	0	0	0	0		4	4	5	4	5	4	5	4	3	4	3	3	5	3	3	6	6	6	2	2	2	2	1	1	1	5		aarhus tech	0	0	0	1	0				4	3
2	17	25	1	0	1	0	0	0		3	1	1	1	1	1	4	4	1	1	1	1	1	2	1	3	2	2	2	3	2	1	2	2	1	2		SOSU Esbjerg	0	0	0	1	0				2	4
			0	0	0	0	0	0																														0	1	0	0	0
2	17	15	1	1	0	0	0	0		1	1	1	1	4	3	5	5	1	3	2	1	1	1	2	1	1	3	2	1	2	3	1	2	1	2		SOSU Esbjerg	0	0	0	1	0				2	4
2	16	20	0	1	0	0	0	0		3	2	3	1	2	3	5	2	1	3	3	2	3	3	2	2	1	1	2	3	3	1	1	2	4	2		SOSU Esbjerg	0	0	0	1	0				2	3
1	16	15	0	1	0	0	0	0		3	3	3	3	5	5	4	4	1	4	1	1	2	2	3	3	3	5	1	4	3	3	3	2	1	5		Aarhus Tech	0	0	0	1	0				2	3
1	17	5	0	0	0	0	0	1	walk and talk	6	3	6	6	5	5	5	4	1	2	3	2	5	2	4	3	5	6	2	1	1	3							0	0	1	0	0				1	4
			0	0	0	0	0	0																														0	1	0	0	0
2	16	45	1	1	1	0	0	1	Morgen/ eftermiddags aktivitet	3	3	3	3	4	4	4	4	2	3	2	3	4	2	2	2	1	1	2	3	3	3	2	4	1	2		SOSU Aarhus	0	0	0	1	0				4	3
1	17	5	0	1	0	1	0	0		2	4	3	3	5	1	5	3	3	1	5	4	1	2	2	1	6	6	2	1	3	1	2	5	1	5		EUC Syd, Sønderborg	0	0	0	1	0				1	4
2	17	10	0	0	1	0	0	0		3	5	4	3	3	3	3	3	3	3	3	3	3	2	2	2	6	2	3	4	4	2	3	2	4	5		Holbæk EUC	0	0	0	1	0				1	4
1	17	30	0	0	1	0	0	0		6	6	6	6	6	6	6	6	6	6	6	6	6	6	6	6	6	6	4	3	3	3	6	6	1	5		Eucnord	0	0	0	1	0				3	4
1	18	10	0	1	0	0	0	0		1	1	3	1	1	1	3	4	1	1	1	4	1	3	2	2	5	5	4	3	2	1	2	2	1	5		EUC	0	0	0	1	0				1	5
1	17	35	0	0	1	0	0	0		2	2	1	1	3	1	5	5	1	3	4	1	4	1	1	1	2	3	2	2	3	3	2	2	1	5		Skive tekniske skole	0	0	0	1	0				3	4
1	17	10	0	0	1	0	0	0		2	1	2	2	2	3	1	2	2	2	2	1	2	2	2	2	2	2	1	1	2	1	1	3	2	2		horsens sosu	0	0	0	1	0				1	4
1	17	20	0	0	0	0	1	0		1	2	2	2	3	1	6	5	1	2	2	1	3	2	3	2	3	3	1	4	5	1	2	2	1	5		EUC Nordvestsjælland	0	0	0	1	0				2	4
2	17	25	1	1	1	0	0	0		5	5	5	4	3	2	3	5	4	4	2	2	3	3	3	2	3	5	2	2	2	2	6	6	5	2		EUC Nordvestsjælland	0	0	0	1	0				2	4
1	16	30	0	0	1	0	0	1	Walk and talk	3	3	6	2	5	5	3	3	1	2	2	2	3	2	2	2	2	5	2	4	4	1	2	4	2	5		Aarhus Tech	0	0	0	1	0				3	3
1	17	60	0	0	0	0	1	0		4	4	5	2	5	3	1	5	4	4	1	3	6	2	2	6	6	6	3	3	3	2	2	3	1	5		Aarhus Tech	0	0	0	1	0				4	4
2	17	55	0	1	1	0	0	0		1	1	2	1	2	1	5	5	1	2	1	1	1	2	2	3	3	2	2	2									0	0	1	0	0				4	4
2	18	10	0	0	1	0	0	0		3	3	3	3	3	3	3	3	3	3	3	3	3	3	3	3	3	3	2	4	3	3	3	3	5	5		Euc nodvestsjælland	0	0	0	1	0				1	5
1	17	15	1	1	0	0	0	0		3	4	3	3	5	1	5	2	1	1	2	3	3	3	2	3	2	2	2	2	2	2	2	1	5	4		Aarhus tech	0	0	0	1	0				2	4
			0	0	0	0	0	0																														0	1	0	0	0
			0	0	0	0	0	0																														0	1	0	0	0
2	17	10	0	1	0	0	0	0		2	1	1	1	3	3	2	2	2	2	3	3	2	2	4	2	1	2	3	3	3	1	3	2	2	2		Sosu Esbjerg	0	0	0	1	0				1	4
			0	0	0	0	0	0																														0	1	0	0	0
2	17	20	1	1	0	0	0	0		3	3	3	3	4	3	4	3	3	3	3	3	3	3	2	3	3	3	3	3	3	1	3	3	1	2		Odense Syd	0	0	0	1	0				2	4
2	18		0	0	0	0	0	0																														0	0	1	0	0					5
1	16	0	0	0	1	0	0	0		5	5	5	5	5	5	2	1	5	5	5	5	5	5	5	5	5	3	1	4	1	2	2	4	5	5		BORNHOLM	0	0	0	1	0				1	3
1	19	60	1	0	0	0	1	0		1	3	1	1	5	1	5	3	1	2	3	1	1	3	2	3	6	6	2	4	2	1	1	1	2	5		EUC nvs	0	0	0	1	0				4	6
1	17	45	0	1	0	1	0	1	Walk and Talk	2	3	3	3	3	2	4	4	1	4	3	3	4	2	1	2	3	6	3	3	2	2	2	2	1	5		Aarhus Tech	0	0	0	1	0				4	4
1	16	60	0	0	0	1	0	0		3	2	1	4	2	3	6	2	5	4	6	4	1	4	5	2	1	3	1	2	4	3	2	3	4	4		Jd	0	0	0	1	0				4	3
1	17	5	0	0	1	0	0	0		4	4	3	5	3	3	5	4	2	2	1	4	3	3	4	3	3	5	3	2	3	1	2	3	1	5		Campus Bornholm	0	0	0	1	0				1	4
1	16	15	0	0	0	0	0	1	Hente / Aflevere ting	4	3	3	2	3	2	5	5	2	3	2	3	3	3	3	2	2	3	2	3	3	1	2	2	1	5		EUC Nordvestsjælland	0	0	0	1	0				2	3
2	17	30	0	0	0	0	0	1	Om morgenen og om eftermiddagen	5	4	3	3	4	5	3	2	3	1	5	4	3	2	3	2	1	1	2	4	5	2	3	2	5	2		SOSU Aarhus	0	0	0	1	0				3	4
1	17	15	0	0	1	0	0	0		5	5	4	4	5	5	5	4	4	4	5	5	6	3	3	3	6	3	4	4	4	2	3	2	5	5		EUC Nord frederikshavn	0	0	0	1	0				2	4
1	16	15	0	0	0	0	0	1	Vi får nogle gange lidt tid til at gå rundt	3	3	3	2	3	3	4	4	2	2	3	2	2	4	6	3	6	6	2	3	3	1	2	4	1	5		Aarhus Tech	0	0	0	1	0				2	3
1	18	20	0	0	1	1	0	0		3	4	5	1	2	5	2	2	5	3	3	2	3	4	3	3	3	5	2	4	5	2	2	5	2	5		campus bornholm	0	0	0	1	0				2	5
2	17	15	0	0	1	1	1	0		3	3	2	2	3	2	4	5	2	2	2	4	2	1	2	1	2	1	2	3	2	1	2	1	1	2		Sosu Fredericia-Vejle-Horsens	0	0	0	1	0				2	4
1	17	60	0	1	1	0	0	0																														0	0	1	0	0				4	4
1	17	60	0	0	1	0	0	1	når vi har været på værksted	3	2	3	3	5	5	5	3	3	2	3	3	3	3	3	3	6	6	2	2	1	3	2	3	1	5		Aarhus tech	0	0	0	1	0				4	4
			0	0	0	0	0	0																														0	1	0	0	0
			0	0	0	0	0	0																														0	1	0	0	0
1	16	15	0	1	0	0	0	0		2	3	2	3	5	4	5	5	2	3	2	3	4	1	4	4	4	5	3	4	3	1	3	3	1	5		Aarhus Tech	0	0	0	1	0				2	3
1	17	60	0	0	0	0	0	1	sidst på dagen	3	4	4	4	4	2	2	2	4	5	2	3	2	3	3	3	5	3	4	1	3	2	1	3	2	5		tech	0	0	0	1	0				4	4
1	19	0	1	0	0	0	0	0		3	1	5	3	1	1	1	1	5	5	1	1	1	3	3	3	3	3	1	4	5	1	2	5	1	6	DATA.	EUC Syd	0	0	0	1	0				1	6
2	18	45	1	1	1	0	0	0		2	1	3	1	3	3	5	5	2	3	3	1	2	2	1	2	1	2	2	3	5	1	2	1	5	2		Sosu aarhus	0	0	0	1	0				4	5
1	16	35	0	0	0	0	1	0		3	4	3	4	4	2	5	4	3	2	3	2	2	2	2	2	5	2	2	4	2	3	2	3	1	5		aarhus tech	0	0	0	1	0				3	3
1	17	15	0	0	1	0	0	0		3	2	2	1	5	2	5	4	1	2	3	3	2	3	2	2	1	1	2	1	2	1	2	3	1	5		campus Bornmholm	0	0	0	1	0				2	4
			0	0	0	0	0	0																														0	1	0	0	0
2	18	30	1	1	0	0	1	0		1	1	1	1	1	2	5	5	1	1	1	1	1	1	1	2	1	1	2	2	1	1	1	1	3	4		Aarhus Tech	0	0	0	1	0				3	5
			0	0	0	0	0	0																														0	1	0	0	0
1	18	30	0	0	1	0	0	0		1	1	1	3	1	1	6	5	1	4	2	2	1	1	1	2	1	2	2	2	3	1	3	2	1	5		SkiveTS	0	0	0	1	0				3	5
			0	0	0	0	0	0																														0	1	0	0	0
			0	0	0	0	0	0																														0	1	0	0	0
			0	0	0	0	0	0																														0	1	0	0	0
			0	0	0	0	0	0																														0	1	0	0	0
			0	0	0	0	0	0																														0	1	0	0	0
2	16	5	1	0	1	0	0	0		3	5	6	5	5	4	3	3	4	3	3	1	4	3	2	4	3	4	2	4	2	1	2	2	3	2		SOSU Horsens	0	0	0	1	0				1	3
			0	0	0	0	0	0																														0	1	0	0	0
1	18	10	0	0	1	0	0	0		2	3	2	2	4	4	4	6	2	2	1	2	3	1	1	2	1	2	4	1	3	3	2	2	2	2		Sosu	0	0	0	1	0				1	5
			0	0	0	0	0	0																														0	1	0	0	0
1	17	50	0	0	1	0	0	0		3	4	4	4	4	3	3	2	3	3	3	2	4	3	3	4	3	4	1	3	3	2	1	3	1	5		CAMPUS BORNHOLM	0	0	0	1	0				4	4
2	17	30	0	1	0	0	0	0		1	4	1	1	3	1	4	1	1	1	2	1	3	3	2	3	1	1	2	4	3	1	2	1	1	2		SOSU Esbjerg	0	0	0	1	0				3	4
2	17	40	0	1	1	1	0	0		3	1	1	1	2	3	5	5	2	2	2	4	2	1	2	2	1	3	3	4	2	1	4	1	4	2		Social - og sundhedsskolen Århus	0	0	0	1	0				3	4
1	17	30	0	0	1	0	0	0		1	2	2	2	1	2	5	5	1	2	2	3	2	1	1	1	2	1	2	2	2	1	2	1	4	2		Sosu Århus	0	0	0	1	0				3	4
2	17	10	0	0	0	1	0	0		2	2	2	1	2	2	5	5	1																				0	0	1	0	0				1	4
			0	0	0	0	0	0																														0	1	0	0	0
2	16	5	0	0	1	0	0	0		2	3	3	1	3	2	4	3	2	3	1	4	2	2	2	2	3	5	1	3	3	3	2	3	1	2		Horsens Social og Sundheds skolen	0	0	0	1	0				1	3
1	19	25	0	0	1	0	1	0		3	3	4	3	3	3	5	5	1	3	1	3	2	3	6	3	3	6	2	3	4	1	3	3	1	5		campus bornholm	0	0	0	1	0				2	6
2	16	45	1	0	1	0	0	1	Morgen og eftermiddags aktivitet	3	2	3	3	3	3	4	4	2	3	2	3	3	2	2	2	1	1	2	3									0	0	1	0	0				4	3
1	17	60	0	1	1	1	1	0		5	2	3	3	3	3	5	5	3	2	4	2	3	2	2	2	2	2	2	1	2	1	2	3	1	2		Sosu vejle	0	0	0	1	0				4	4
2	17	35	0	1	1	0	0	0		3	3	3	3	3	3	3	3	3	2	5	3	4	5	6	6	6	6	2	3	2	2	1	4	2	6	SKskk	LAlala	0	0	0	1	0				3	4
			0	0	0	0	0	0																														0	1	0	0	0
2	17	20	1	1	0	1	0	0		3	4	4	5	5	3	3	5	4	4	4	2	3	3	3	3	6	6	4	1	2	3	1	2	1	2		SOSU Fyn Syd	0	0	0	1	0				2	4
1	17	15	0	0	1	0	0	0		2	2	2	2	2	2	2	2	2	3	3	3	2	3	3	3	3	3	1	4	1	3	1	1	5	5		rønne	0	0	0	1	0				2	4
2	17	45	0	0	1	0	0	0		1	6	6	6	6	3	5	6	1	6	6	3	1	5	2	3	3	2	2	4	3	3	3	3	1	5		Campus Bornholm	0	0	0	1	0				4	4
1	16	0	1	0	0	0	0	0		3	3	3	3	3	2	4	5	3	3	3	1	2	4	2	3	5	5	3	3	4	1	1	2	2	5		EUC NVS	0	0	0	1	0				1	3
			0	0	0	0	0	0																														0	1	0	0	0
2	18	20	0	0	0	0	1	0		6	4	3	4	4	3	2	4	6	4	4	4	3	3	6	3	6	6	1	2	1	1	1	4	1	4		Aarhus Tech	0	0	0	1	0				2	5
2	17	20	0	1	0	0	0	0		3	3	3	3	2	3	4	4	1	2	3	3	2	2	1	2	1	2	4	2	3	1	2	3	1	2		Sosu Aarhus	0	0	0	1	0				2	4
2	17	20	1	1	1	0	0	0		3	3	3	2	3	2	5	4	1	1	1	2	2	3	4	3	3	3	2	1	2	1	2	2	2	2		sosu horsens	0	0	0	1	0				2	4
1	18	45	0	0	1	0	0	1	når vi er på værkstedet	3	3	2	3	2	2	2	3	3	3	2	2	4	2	3	3	2	3	2	2	3	1	2	2	3	5		EUC nordvestsjælland	0	0	0	1	0				4	5
1	17	5	1	1	1	0	0	0		6	6	6	3	6	6	6	6	3	3	3	3	3	3	3	3	6	3	2	4	4	1	2	5	5	5		holbæk euc	0	0	0	1	0				1	4
1	18	5	0	0	1	0	0	0		3	4	4	4	4	3	4	4	3	3	3	3	4	6	3	3	4	6	2	4	2	3	1	2	1	5		Aarhus tech	0	0	0	1	0				1	5
			0	0	0	0	0	0																														0	1	0	0	0
			0	0	0	0	0	0																														0	1	0	0	0
1	17	55	0	0	1	0	0	0		1	2	1	4	1	1	5	5	1	1	2	1	1	1	1	1	1	1	2	2	2	1	2	1	1	2		Sosu	0	0	0	1	0				4	4
			0	0	0	0	0	0																														0	1	0	0	0
2	16	35	1	1	1	1	0	0		2	3	3	1	1	1	5	5	1	2	2	2	1	2	1	1	1	1	2	3	2	1	2	1	4	2		Aarhus sosu	0	0	0	1	0				3	3
			0	0	0	0	0	0																														0	1	0	0	0
1	17	5	0	0	0	1	0	0		2	3	4	3	3	2	5	6	3	3	4	3	3	3	3	4	6	3	3	1	3	1	2	2	4	5		celf nykøbing f	0	0	0	1	0				1	4
1	17	0	1	0	0	0	0	0		6	2	3	1	3	2	5	6	2	6	6	6	6	6	4	6	6	6	2	2	2	1	2	2	1	5		Aarhus tech	0	0	0	1	0				1	4
2	17	30	0	1	1	0	1	0		3	3	3	2	4	3	4	4	2	3	2	2	3	2	3	3	3	3	2	3	3	1	3	3	1	2		Social og sundhedsskolen, EUX Randers	0	0	0	1	0				3	4
2	16	45	0	1	1	0	0	0		2	1	2	2	2	2	4	4	1	2	1	1	2	2	1	2	2	1	2	3	3	1	2	3	4	2		Sosu Aarhus / Ioos	0	0	0	1	0				4	3
			0	0	0	0	0	0																														0	1	0	0	0
2	17	45	0	0	1	0	1	0		3	3	3	3	2	3	4	4	3	2	3	2	3	2	2	2	2	1	2	3	4	2	2	2	4	2		Sosu århus	0	0	0	1	0				4	4
1	17	20	0	0	0	1	0	0		3	3	3	1	4	1	5	3	3	2	2	2	2	3	3	2	6	6	2	1	2	1	2	2	1	5		EUC Nordvestsjælland	0	0	0	1	0				2	4
2	18	20	0	0	1	1	0	0		3	3	5	4	3	3	1	5	4	2	3	3	3	2	5	3	5	5	3	3	4	2	2	1	1	2		Aarhus tech	0	0	0	1	0				2	5
2	16	30	0	0	1	0	0	1	Morgen og eftermiddags aktivitet	2	2	2	2	3	2	5	4	1	3	2	3	4	2	3	2	2	3	2	3	3	1	3						0	0	1	0	0				3	3
2	17	15	0	1	1	0	0	0		3	3	3	2	4	2	5	5	2	3	3	2	3	2	2	2	3	2	4	3	2	1	2	1	1	2		Social og Sundhedsskolen Aarhus	0	0	0	1	0				2	4
2	17	20	0	0	1	0	0	0		3	2	4	3	3	2	3	2	3	3	3	5	3	3	3	3	6	6	2	2	2	2	2	3	2	5		Aarhus tech	0	0	0	1	0				2	4
2	17	20	0	1	0	0	0	0																														0	0	1	0	0				2	4
1	19	45	0	0	1	1	0	0		1	1	1	1	1	1	5	5	1	1	1	2	1	1	1	1	1	1	2	1	1	1	1	1	1	2		SOSU Aarhus	0	0	0	1	0				4	6
1	17	20	1	1	1	1	0	0		3	3	2	2	3	2	5	5	2	3	3	3	3	3	2	2	2	3	2	4	4	3	3	2	5	5		EUC Nordvest sjælland Holbæk	0	0	0	1	0				2	4
1	17	60	0	0	1	0	0	0		3	5	5	3	6	2	5	3	3	2	4	2	1	3	2	4	5	4	2	3	2	2	3	3	1	4		Aalborg food college	0	0	0	1	0				4	4
1	17	45	1	1	0	0	1	0		2	2	3	2	3	3	5	4	3	3	3	2	3	3	3	3	3	3	2	2	1	1							0	0	1	0	0				4	4
1	16	40	1	0	0	1	0	0		3	2	3	2	3	1	5	3	2	3	2	2	2	2	2	2	3	3	3	3	2	3	1	2	1	5		Euc Nordvestsjælland	0	0	0	1	0				3	3
1	17	40	0	0	0	1	0	1	at gå rundt i værkstedet	6	6	5	5	5	4	3	2	6	6	6	6	3	6	6	6	6	6	2	1	4	2	2	3	4	5		EUC Syd Sønderborg	0	0	0	1	0				3	4
2	16	40	0	0	1	1	0	1	Et breake	3	2	2	2	3	2	5	5	2	2	2	2	2	2	3	2	2	3	2	3	2	1	2	2	4	2		Sosu Herning	0	0	0	1	0				3	3
2	17	45	0	0	1	0	0	1	Til morgen og eftermiddags aktivitet	2	2	2	2	4	3	5	5	3	3	1	1	3	3	2	3	1	3	2	3	4	1	4	2	3	2		SOSU Aarhus	0	0	0	1	0				4	4
2	17	10	0	0	0	0	0	1	Vi har haft få idrætsdage og de første 3-4 uger lavede vi nogle små breaks.	3	1	3	1	3	1	5	2	1	1	3	2	3	1	3	2	6	6	2	2	2	1	1	1	1	6	Tror det er Omsorg, sundhed og pædagogik, Mediegrafiker.	Aarhus Tech Dollerupvej	0	0	0	1	0				1	4
1	18	25	1	0	1	0	0	0		2	3	3	3	4	2	5	2	2	4	4	1	1	1	1	1	1	1	2	1	1	1	2	2	1	2		SOSU AARHUS	0	0	0	1	0				2	5
2	17	30	1	0	1	0	0	1	Hvis lærende synes vi ikke kan mere	2	2	2	2	5	2	4	4	2	3	2	2	4	1	3	3	2	2	4	4	4	1	4	1	2	2		Sosu Aarhus	0	0	0	1	0				3	4
			0	0	0	0	0	0																														0	1	0	0	0
1	17	5	0	1	0	0	0	0		1	2	3	1	4	3	5	4	1	2	2	2	2	3	3	2	4	2	2	1	2	1	2	3	1	4		Aarhus tech	0	0	0	1	0				1	4
2	16	45	0	0	1	0	0	0		1	1	2	1	4	4	4	5	1	1	2	2	2	2	2	2	2	2	3	4	5	3	3	2	3	2		Aarhus	0	0	0	1	0				4	3
2	17	45	0	1	0	0	0	0		2	2	3	1	6	4	3	5	1	2	2	3	3	3	2	2	6	6	2	3	3	1	2	2	1	4		Aarhus tech	0	0	0	1	0				4	4
2	18	20	1	1	0	0	0	0		1	3	3	1	3	1	5	6	1	6	2	2	2	2	6	2	6	6	2	1	2	1	1	1	1	2		Aarhus tech	0	0	0	1	0				2	5
2	17	10	0	0	0	0	1	0		3	3	3	1	4	5	4	4	2	3	3	3	4	4	2	3	6	3	4	3									0	0	1	0	0				1	4
1	17	40	0	0	0	0	1	0		2	2	2	3	5	1	5	5	1	1	1	1	5	5	4	1	5	1	2	4	2	1	2	1	1	4		Aarhustech	0	0	0	1	0				3	4
1	13	5	0	0	0	1	0	0		1	1	1	1	1	1	5	6	1	2	2	2	2	3	3	3	3	3	1	4	2	1	3	5	5	2		SOSU aarhus	0	0	0	1	0				1
1	18	20	1	0	0	1	1	0		2	3	3	3	3	1	4	4	3	3	2	4	2	3	2	3	3	4	3	3	3	2	3	2	4	5		Campus Bornholm	0	0	0	1	0				2	5
			0	0	0	0	0	0																														0	1	0	0	0
			0	0	0	0	0	0																														0	1	0	0	0
1	19	15	0	1	1	1	0	0		1	1	1	2	2	1	6	6	1	1	1	1	1	2	1	1	1	1	2	2	1	1	2	3	1	2		Sosu Aarhus	0	0	0	1	0				2	6
2	17	25	1	1	1	0	0	0		1	1	1	1	3	2	5	5	1	3	1	2	2	1	1	1	1	2	2	3	3	1	3	2	2	2		SOSU Århus	0	0	0	1	0				2	4
1	16	60	0	0	0	0	0	1	SLET IKKE DUDE	1	1	3	1	5	1	5	3	2	4	5	1	5	5	5	1	1	3	2	3	1	2	1	2	1	5		EUCNVS	0	0	0	1	0				4	3
1	18	10	0	1	0	0	0	0		2	3	5	5	4	2	3	5	4	3	2	5	4	3	2	5	3	5	3	3	3	3	3	2	5	6	personvognsmekaniker	Aarhus tech	0	0	0	1	0				1	5
2	16	20	1	1	0	0	0	0		2	4	4	2	4	4	4	6	1	3	4	2	4	3	2	3	3	2	2	2	2	3	3	2	1	4		Aarhus tech	0	0	0	1	0				2	3
2	17	30	0	1	1	0	0	0		1	3	2	1	2	1	5	3	1	3	2	2	2	1	2	1	1	1	2	2	2	1	2	3	2	2		Sosu	0	0	0	1	0				3	4
			0	0	0	0	0	0																														0	1	0	0	0
			0	0	0	0	0	0																														0	1	0	0	0
2	16	35	0	0	1	0	1	0		2	2	2	2	4	2	5	6	1	2	2	2	1	2	2	2	2	2	2	3	3	1	3	3	3	2		Sosu Aarhus	0	0	0	1	0				3	3
			0	0	0	0	0	0																														0	1	0	0	0
			0	0	0	0	0	0																														0	1	0	0	0
			0	0	0	0	0	0																														0	1	0	0	0
2	18	45	0	1	1	0	0	0		1	2	2	2	2	2	5	5	2	2	2	2	3	2	2	2	2	2	1	4	3	1	2	2	2	2		Sosu Aarhus	0	0	0	1	0				4	5
1	17	0	0	0	1	0	0	0		5	5	5	4	5	5	1	2	5	5	4	5	5	3	4	3	4	4	1	4	1	2	3	4	5	6	lastvognsmekaniker	capusbornholm	0	0	0	1	0				1	4
2	17	30	0	1	1	0	0	0		2	1	1	1	3	2	5	3	1	2	2	2	3	3	2	3	2	2	2	3	3	1	2	3	2	2		Sosu Århus	0	0	0	1	0				3	4
2	16	25	0	1	1	0	1	0		5	3	2	4	4	2	2	4	4	3	4	3	2	2	3	4	4	5	3	2	4	3	3	4	1	2		Sosu Aarhus	0	0	0	1	0				2	3
2	17	40	0	1	1	0	0	0		2	1	2	2	4	5	5	4	2	3	2	2	3	2	2	2	1	6	2	2	2	1	1	2	1	2		SOSU Aarhus	0	0	0	1	0				3	4
2	17	45	0	0	1	0	0	1	morgen- og eftermiddags aktivitet	2	2	4	2	3	1	6	4	2	3	3	4	1	2	1	1	1	1	3	3	2	2	3	4	1	2		SOSU Aarhus	0	0	0	1	0				4	4
1	16	0	0	0	1	0	1	0		4	3	4	3	5	3	3	2	4	2	1	1	1	3	3	3	5	5	2	3	2	2	2	3	1	5		Aarhus Tech	0	0	0	1	0				1	3
1	17	5	0	0	1	0	0	0		3	5	3	3	4	4	3	4	3	3	3	4	4	2	2	2	2	1	2	4	5	2	3	1	3	6	Social og sundheds assistent	Sosu Horsens	0	0	0	1	0				1	4
2	17	45	0	0	0	0	0	1	30 før undervisning og 30 efter undervisningen	3	2	2	1	4	4	5	5	2	3	3	1	6	1	2	1	1	1	2	3	2	3	2	2	1	2		SOSU Aarhus	0	0	0	1	0				4	4
2	18	40	1	1	1	0	0	0		1	6	3	1	2	1	5	5	1	1	1	1	2	2	1	1	1	3	1	4	5	2	2	1	4	2		SOSU århus	0	0	0	1	0				3	5
2	17	40	0	1	1	0	0	0		3	2	3	1	2	2	4	4	2	2	1	1	3	2	1	2	2	3	2	4	5	1	2	2	3	2		Sosu Aarhus	0	0	0	1	0				3	4
1	17	0	0	0	0	1	1	0		2	1	3	1	2	1	3	5	3	1	1	1	1	1	1	1	6	6	2	3	3	1	2	1	1	5		EUCSyd	0	0	0	1	0				1	4
			0	0	0	0	0	0																														0	1	0	0	0
2	18	50	0	0	0	0	0	1	Det har mest været en halv time inden vi sluttede og en 20 minutter når vi lige var startet	2	4	3	3	5	5	3	1	4	2	2	2	2	1	1	1	1	1	2	3	2	1	1	3	1	2		Sosu aarhus	0	0	0	1	0				4	5
2	18	40	0	1	1	0	0	0		2	2	2	1	3	1	5	5	1	3	3	1	1	1	2	1	2	1	2	3	3	1	3	2	1	2		Sosu Aarhus	0	0	0	1	0				3	5
2	16	10	0	0	0	1	1	1	Idrætsdagene	3	3	3	3	3	3	3	3	3	3	3	3	3	3	3	3	3	3	3	2	2	2	2	3	1	2		AARHUS TECH	0	0	0	1	0				1	3
			0	0	0	0	0	0																														0	1	0	0	0
1	17	15	0	0	1	0	0	0		3	3	3	3	3	3	3	3	3	2	2	2	2	2	3	2	6	1	2	3	3	2	2	3	2	5		skive tekniske skole	0	0	0	1	0				2	4
			0	0	0	0	0	0																														0	1	0	0	0
2	16	60	1	0	1	1	0	1	I erhversfagene	1	2	2	1	3	3	5	5	1	1	2	1	1	3	1	1	6	6	2	4	4	1	1	1	1	5		Aarhus Tech	0	0	0	1	0				4	3
2	17	15	0	0	1	0	1	0		1	2	2	1	1	2	5	5	3	1	2	3	3	3	5	3	3	5	2	3	4	1	3	2	1	2		SOSU Horsens	0	0	0	1	0				2	4
1	16	10	0	1	1	0	0	0		3	3	2	1	5	4	2	3	3	3	2	1	3	1	3	1	5	5	3	4	2	1	3	1	3	6	Trends og Medie	Aarhus Tech	0	0	0	1	0				1	3
2	17	40	0	0	1	0	1	1	Hver morgen	2	3	3	2	3	3	5	6	2	2	2	3	3	3	1	1	2	2	1	2	3	1	3	3	1	2		Sosu Århus	0	0	0	1	0				3	4
2	18	5	0	0	0	0	1	0																														0	0	1	0	0				1	5
2	17	25	0	0	1	0	0	0		3	3	3	2	3	3	4	4	2	1	2	2	3	3	2	2	6	5	3	3	3	1	2	2	2	2		Aarhus Tech	0	0	0	1	0				2	4
1	17	25	0	1	1	0	0	0		2	2	2	2	2	2	3	4	3	2	3	2	2	2	3	3	3	2	1	3	3	1	3	2	1	4		aarhus tech	0	0	0	1	0				2	4
2	17	15	0	1	1	0	0	0		6	6	2	4	4	4	4	3	6	4	3	5	3	2	3	6	3	6	3	4	3	1	3	3	1	2		Sosu Aarhus	0	0	0	1	0				2	4
			0	0	0	0	0	0																														0	1	0	0	0
1	17	10	0	0	1	0	1	0		2	2	4	3	3	1	5	3	3	2	2	2	2	3	3	3	6	6	2	3	5	2	2	2	5	6	euc	EUC holbæk	0	0	0	1	0				1	4
2	17	20	0	1	0	0	0	0		2	2	2	2	4	2	5	5	2	2	2	2	2	3	2	3	3	3	2	2	2	2	2	2	1	2		Sosu Esbjerg	0	0	0	1	0				2	4
			0	0	0	0	0	0																														0	1	0	0	0
1	17	30	1	0	1	0	0	0		3	3	2	1	3	2	5	4	2	3	2	1	2	6	6	6	6	6	2	3	3	1	1	2	1	5		Euc Nordvestsjælland Holbæk	0	0	0	1	0				3	4
2	17	10	0	0	1	0	0	0		2	2	5	3	6	6	6	6	3	3	3	2	3	3	3	2	6	6	2	2	2	2	3	2	1	2		Aarhus tech	0	0	0	1	0				1	4
			0	0	0	0	0	0																														0	1	0	0	0
2	16	35	0	0	0	0	0	1	Når vi er i køkkenet	2	3	3	3	3	3	3	4	3	2	2	3	2	3	2	3	6	4	4	3	3	3	3	2	1	4		Aalborg tech College food	0	0	0	1	0				3	3
2	16	15	1	0	0	0	1	0		3	3	3	3	3	3	3	3	3	2	2	1	2	3	3	3	4	4	3	1	3	2	2	3	5	2		Aarhus tech	0	0	0	1	0				2	3
1	19	15	1	0	0	0	0	0		2	2	2	3	3	3	4	3	2	2	2	2	2	2	2	3	5	2	1	3	3	1	3	2	1	5		EUC Syd Sønderborg	0	0	0	1	0				2	6
2	18	25	0	0	1	1	1	0		2	2	1	2	2	1	2	3	2	2	2	2	2	1	2	3	3	2	2	1	3	2	2	5	1	2		euc holbæk	0	0	0	1	0				2	5
2	17	20	1	0	1	1	1	0		1	2	2	2	2	2	5	6	2	2	2	2	3	3	3	3	2	3	3	4	4	1	2	2	1	2		SOSU Horsens	0	0	0	1	0				2	4
2	18	55	0	0	0	0	1	0		2	2	1	1	2	2	4	4	1	2	1	2	2	3	3	3	3	3	2	1	3	1	2	2	1	2		Sosu Horsens	0	0	0	1	0				4	5
			0	0	0	0	0	0																														0	1	0	0	0
1	17	30	0	1	1	0	1	0		2	1	1	1	3	2	5	5	2	3	3	1	2	2	2	3	1	1	2	3	2	1	2	1	1	2		sosu Aarhus	0	0	0	1	0				3	4
2	16	20	0	0	1	1	0	0		6	6	4	4	5	3	2	1	3	2	2	2	2	1	3	3	5	3	2	2	3	3	1	1	4	4		Aalborg tech	0	0	0	1	0				2	3
2	17	10	0	0	0	1	0	0		1	2	1	1	4	2	5	6	1	1	2	1	5	4	4	2	6	2	2	1	2	1	3	3	2	4		Aarhus tech	0	0	0	1	0				1	4
1	17	0	1	0	0	0	0	0		2	3	2	2	5	3	5	5	2	5	5	5	5	3	3	3	2	5	2	1	2	1	2	2	1	5		Eucnvs	0	0	0	1	0				1	4
2	17	0	0	0	1	0	0	0		3	3	3	3	3	3	3	3	3	3	3	3	3	4	4	4	4	4	1	3	1	3	6	6	5	6	Trend og medie	Aarhus tech	0	0	0	1	0				1	4
1	17	15	0	1	0	0	0	0		3	4	4	2	5	3	4	5	2	2	2	2	2	2	3	2	5	2	2	3	3	1	2	1	3	4		Aarhus tech	0	0	0	1	0				2	4
			0	0	0	0	0	0																														0	1	0	0	0
1	18	20	0	1	0	0	0	0		2	5	3	3	5	5	2	3	3	2	2	2	2	2	2	2	6	6	2	4	2	1	2	2	1	5		Aarhus tech	0	0	0	1	0				2	5
2	17	45	1	0	0	0	0	0		2	6	2	5	2	2	5	5	2	2	2	2	2	2	6	2	1	1	2	1	2	1	2	6	2	2		Randers social- sundhedsskolen	0	0	0	1	0				4	4
2	16	30	0	1	0	0	0	0		1	2	2	2	2	3	5	5	1	2	1	1	4	2	3	2	2	3	2	3	2	1	1	2	1	2		SOSU	0	0	0	1	0				3	3
			0	0	0	0	0	0																														0	1	0	0	0
1	18	40	0	0	0	1	0	0		6	5	5	3	4	2	3	1	4	4	1	1	1	5	3	3	1	6	1	4	5	2	2	2	1	5		holbæk euc	0	0	0	1	0				3	5
2	17	20	1	0	0	1	1	0		1	4	3	3	5	4	1	3	2	1	1	4	1	1		1	6	6											0	0	1	0	0				2	4
			0	0	0	0	0	0																														0	1	0	0	0
2	16	15	1	0	1	0	1	0		1	6	6	6	6	6	5	1	1																				0	0	1	0	0				2	3
			0	0	0	0	0	0																														0	1	0	0	0
2	17	20	0	1	0	0	0	0		2	3	3	2	3	3	5	3	3	2	2	2	2	2	3	3	2	3	3										0	0	1	0	0				2	4
1	16	20	0	1	0	1	0	0		6	6	6	6	6	6	6	6	6	6	6	6	6	6	6	6	5	6	1	4	3	1	5	2	5	2		Den her	0	0	0	1	0				2	3
1	17	30	1	1	1	1	1	0		2	2	3	2	3	3	3	3	3	3	3	3	3	1	2	2	1	4	3	4	2	1	3	2	4	5		EUC NORDVESTSJÆLLNAD	0	0	0	1	0				3	4
1	17	40	0	0	1	0	0	0		3	1	1	1	3	2	5	5	1	4	3	2	3	2	6	1	6	3	2	2	2	1	2	2	1	5		Teknisk skole Skive	0	0	0	1	0				3	4
2	18	30	0	0	0	0	0	1																														0	0	1	0	0				3	5
			0	0	0	0	0	0																														0	1	0	0	0
2	17	15	0	0	1	0	0	0		2	2	3	2	2	2	5	5	2	2	2	2	2	2	2	2	2	6	2	4	4	1	2	2	1	6	Grundforløb 1	Sosu Aahus	0	0	0	1	0				2	4
1	17	30	1	0	1	1	0	0		3	2	3	2	3	2	5	3	1	1	2	2	2	1	2	2	6	6	2	3	2	3	2	3	1	4		Tech college	0	0	0	1	0				3	4
			0	0	0	0	0	0																														0	1	0	0	0
1	17	0	0	0	1	1	0	1	Nogle gange hvis vi ik havde noget at lave	2	3	3	1	3	3	4	3	2	3	2	2	1	4	3	3	3	4	1	1	3	3	2	6	2	6	Mekaniker	Aarhus tech	0	0	0	1	0				1	4
1	17	30	0	0	1	0	1	0		4	3	3	3	2	4	4	5	2	2	3	3	3																0	0	1	0	0				3	4
1	18	30	0	0	1	0	0	0		2	2	2	2	4	2	4	4	2	3	2	3	2	3	2	3	2	2	2	2	3	1	3	3	3	5		Campus Bornholm	0	0	0	1	0				3	5
1	17	30	1	0	1	1	0	0		2	2	2	3	3	2	5	5	2	2	3	2	4	3	3	3	3	4	2	1	2	1	3	2	1	5		Celf	0	0	0	1	0				3	4
1	18	45	0	0	1	0	0	0		4	4	5	3	4	3	4	4	2	4	4	3	2	5	1	2	3	2	2	4	3	2	3	3	1	5		Campus Bornholm	0	0	0	1	0				4	5
2	17	5	1	0	0	0	0	0		3	2	1	1	4	2	5	5	1	2	3	3	4	3	4	1	5	3	2	2	2	1	1	1	2	2		Aarhus Tech	0	0	0	1	0				1	4
1	17	15	0	0	1	1	0	0		6	6	6	6	6	6	6	6	6	6	6	6	3	6	6	6	6	6	2	3	3	2	1	3	1	5		Skive tekniske skole	0	0	0	1	0				2	4
2	17	20	0	0	0	0	1	0		1	1	4	4	4	4	4	2	1	2	2	3	1	3	3	3	5	5	3	2	2	2	3	2	1	2		århus tech	0	0	0	1	0				2	4
2	17	10	0	1	1	1	0	0		2	3	4	3	4	3	4	5	2	2	2	2	2	3	4	1	4	4	2	2	3	3	1	2	1	6	Mediegrafiker	Aarhus tech	0	0	0	1	0				1	4
2	16	40	1	0	0	1	0	0		3	4	3	3	3	3	2	3	3	3	3	2	3	3	3	2	6	6	2	3	3	1	1						0	0	1	0	0				3	3
1	18	10	1	0	0	1	0	0		2	4	4	4	5	4	6	5	4	4	4	4	4	6	6	6	6	3	4	4	3	2	2	2	1	5		Aarhus tech	0	0	0	1	0				1	5
2	17		0	0	0	0	0	0																														0	0	1	0	0					4
2	17	10	0	0	1	0	0	1	Kbh tur	4	3	4	3	5	5	4	3	3	5	5	5	5	4	3	4	4	3	1	3	5	2	3	3	4	5		Skive Teknisk Skole	0	0	0	1	0				1	4
1	19	0	0	1	1	1	0	0		6	4	5	5	3	6	2	1	5	5	6	4	5	2	4	5	5	4	1	3	2	2	1	3	1	6	Web-integrator GF1	AARHUS TECH	0	0	0	1	0				1	6
2	17	55	0	0	1	0	0	0		2	2	1	2	3	1	5	2	1	2	2	1	1	1	1	1	1	1	2	1	2	1	2	1	3	2		Sosu Aarhus	0	0	0	1	0				4	4
1	17	60	0	1	0	0	1	0		1	1	1	1	1	1	1	1	1	1	1	1	1	1	1	1	1	1	4	4	2	1	2	2	1	5		Aarhus tech	0	0	0	1	0				4	4
1	17	15	0	0	0	1	0	1	walk and talk	3	1	1	2	2	1	5	4	1	1	1	1	5	3	3	3	3	4	2	2	2	1	1	2	1	5		AAHUS TECH	0	0	0	1	0				2	4
1	16	20	0	1	1	1	0	0		3	2	3	6	4	2	4	4	6	2	2	2	3	5	5	1	5	3	2	4	3	1	2	2	1	5		Skive Tekniske Skole	0	0	0	1	0				2	3
2	16	10	1	0	0	0	0	0		3	1	3	2	3	2	5	1	3	2	2	2	3	4	6	3	6	6	1	4	5	3	3	2	2	5		Aarhus	0	0	0	1	0				1	3
2	17	30	0	0	1	0	0	0		3	3	3	3	4	3	5	5	2	2	3	3	2	2	2	2	2	6	2	3	4	1	3	2	1	2		SoSU Aarhus	0	0	0	1	0				3	4
			0	0	0	0	0	0																														0	1	0	0	0
2	17	20	0	0	1	0	0	0		1	1	1	1	1	1	5	5	1	1	1	1	1	1	3	1	5	5	2	1	2	1	3	2	1	2		Kolding Sosu	0	0	0	1	0				2	4
1	17	5	0	0	1	0	1	0		5	3	5	5	5	5	4	3	2	3	5	4	5	1	1	2	6	6	1	4	3	2	2	2	1	2		Aarhus	0	0	0	1	0				1	4
2	17	30	0	1	1	0	0	0		2	2	2	2	2	2	5	5	2	2	1	2	1	1	1	1	1	1	2	3	4	1	4	1	1	2		sosu hosens	0	0	0	1	0				3	4
2	16	30	0	1	0	0	0	1	idrætsdage	3	3	3	2	4	3	3	4	3	3	3	2	3	2	3	2	5	5	2	3	3	1	2	2	1	5		Aarhus tech	0	0	0	1	0				3	3
2	17	60	0	0	1	0	1	0		3	6	3	3	4	3	5	5	2	2	2	2	6	2	2	3	6	3	3	3	3	1	3	3	2	5		Skive teknisk skole	0	0	0	1	0				4	4
1	16	35	0	0	1	0	0	0		5	5	4	3	5	4	4	2	4	5	5	2	1	2	1	2	2	6	2	3	4	1	2	1	1	5		Skive Teknisk Skole	0	0	0	1	0				3	3
1	16	5	0	0	0	0	1	1	"Walk and talk" = Tur op til bussen	1	1	1	1	5	1	5	4	1	1	1	2	4	2	5	3	5	5	2	4	3	1	2	3	1	5		Aarhus Tech	0	0	0	1	0				1	3
2	16	10	0	1	1	0	0	0		4	1	2	1	4	1	4	4	1	1	2	3	2	3	2	2	3	3	3	3	4	3	3	3	1	5		Skive Tekniske skole	0	0	0	1	0				1	3
1	17	0	0	0	0	0	0	1	i starten	4	4	4	6	4	5	3	5	1	5	6	5	1	5	5	3	5	5	3	1	2	1	3	4	1	5		Aarhus Tech	0	0	0	1	0				1	4
2	19	25	0	1	1	0	0	0		3	1	3	2	2	3	4	5	1	2	4	2	2	2	2	2	2	3	2	2									0	0	1	0	0				2	6
1	16	10	0	0	0	0	1	0		3	6	3	6	5	2	5	5	2	5	5	2	5	6	6	6	6	6	3	3	2	1	2	2	1	5		EUC NVS EUX teknisk	0	0	0	1	0				1	3
1	18	15	0	0	0	0	0	1	Motionsdage	6	3	3	2	4	2	5	5	2	2	2	1	4	1	4	3	3	4	2	1	3	1	2	2	1	2		Aarhus Tech	0	0	0	1	0				2	5
2	17	10	0	0	1	0	0	0																														0	0	1	0	0				1	4
1	18	15	0	0	0	1	1	0		1	3	3	3	3	2	4	4	3	3	2	2	2	3	3	3	5	6	3	3	5	3	2	2	2	5		Aarhus tech Dollerupvej	0	0	0	1	0				2	5
2	16	15	1	0	1	1	0	0		3	3	4	2	4	1	4	3	3	2	1	3	1	1	2	2	6	6	3	3	3	1	2	2	1	6	Mediegrafiker	Aarhus tech	0	0	0	1	0				2	3
1	18	10	0	0	1	0	0	0		2	4	3	2	2	3	3	4	3	2	2	2	3	1	3	1	4	1	2	4	4	1	2	1	2	2		SOSU Horsens	0	0	0	1	0				1	5
1	18	15	0	1	0	0	0	0		6	6	6	6	6	6	6	6	6	4	4	4	4	6	6	6	6	6	2	4	3	3	1	1	4	5		EUCnord	0	0	0	1	0				2	5
1	16	10	0	0	1	0	0	0		2	2	2	1	4	1	5	5	2	3	1	1	1	6	3	6	1	4	2	3	3	1	3	3	4	5		Campus Bornholm	0	0	0	1	0				1	3
1	17	60	0	1	0	0	0	0		2	2	2	4	2	3	3	2	2																				0	0	1	0	0				4	4
			0	0	0	0	0	0																														0	1	0	0	0
2	16	30	0	0	0	1	0	0		1	2	3	3	2	2	5	5	2	2	2	2	2	2	4	2	2	3	2	2	3	3	4	4	1	2		SOSU Herning	0	0	0	1	0				3	3
2	17	30	0	1	1	0	0	0		5	5	5	5	5	5	4	4	3	4	3	3	3	4	4	2	2	3	2	2	3	1	2	4	1	2		sosu Herning	0	0	0	1	0				3	4
2	17	15	0	1	1	1	0	0		3	1	2	3	4	3	5	5	1	3	3	3	3	2	3	3	3	4	1	4	4	3	3	2	4	2		SOSU Herning	0	0	0	1	0				2	4
			0	0	0	0	0	0																														0	1	0	0	0
2	18	15	0	0	1	0	0	0		3	3	3	2	3	3	4	4	3	3	3	1	3	2	2	2	2	2	4	4	3	3	3	6	2	2		herning	0	0	0	1	0				2	5
1	16	10	0	1	0	1	0	0		4	3	4	2	5	4	5	4	2	2	2	3	3	2	3	2	6	6	2	1	2	1	3	2	1	5		Mercantec viborg	0	0	0	1	0				1	3
2	17		0	0	0	0	0	0																														0	0	1	0	0					4
2	16	5	0	0	1	0	0	0		2	2	3	2	4	3	4	3	2	3	2	3	2	2	3	2	2	2	2	1	2	3	2	3	2	2		Sosu Herning	0	0	0	1	0				1	3
			0	0	0	0	0	0																														0	1	0	0	0
2	17	20	1	1	1	1	1	0		3	1	2	3	3	4	5	5	2	3	1	2	3	2	2	2	2	3	2	3	2	1	2	1	1	2		Sosu Aarhus	0	0	0	1	0				2	4
2	16	15	1	1	1	1	0	0		3	2	1	2	3	1	3	3	1	2	3	4	2	2	3	3	2	3	2	3	2	1	1	1	5	2		sosu Herning	0	0	0	1	0				2	3
2	17	5	0	0	1	0	0	0		4	3	4	3	2	3	4	3	3	2	2	3	3	2	3	2	3	3	4	4	3	2	3	3	1	2		sosu	0	0	0	1	0				1	4
2	16	25	0	0	1	0	1	0		2	1	1	1	1	2	4	5	1	1	1	1	1	1	1	1	1	3	2	4	2	1	3	2	1	2		Sosu Aarhus	0	0	0	1	0				2	3
2	17	5	0	0	1	0	0	0		3	4	4	2	4	2	4	4	3	3	1	2	2	2	3	2	2	6	3	3	4	1	2	3	4	2		Sosu	0	0	0	1	0				1	4
2	17	30	1	1	1	0	0	0		1	1	1	1	1	2	5	5	1	3	3	3	3	2	1	1	1	1	3	3	3	1	1	1	2	2		Sosu fyn	0	0	0	1	0				3	4
1	16	20	0	0	1	1	0	0		3	6	6	2	6	3	5	3	3	2	2	1	2	2	3	2	6	6	4	2	2	3	3	3	1	5		Holbæk	0	0	0	1	0				2	3
1	18	40	1	0	1	0	0	0		3	4	6	3	5	3	4	4	2	3	3	2	4	3	2	3	2	4	2	1	2	3	1	3	1	5		Campus bornholm	0	0	0	1	0				3	5
			0	0	0	0	0	0																														0	1	0	0	0
2	16	10	0	0	1	0	0	0		5	2	2	3	3	6	2	5	2	4	2	3	2	3	2	2	1	4	1	2	3	2	2	2	1	2		SOSU Vejle	0	0	0	1	0				1	3
1	16	10	0	0	1	0	0	0		1	3	3	1	1	2	4	3	2	1	1	1	1	1	1	1	6	6	2	1	1	3	2	3	5	5		EUC holbæk	0	0	0	1	0				1	3
2	17	20	0	0	1	0	0	0		2	3	3	2	4	3	5	5	2	2	2	2	3	3	2	2	2	2	2	3	5	1	3	2	1	2		Sosu Horsens	0	0	0	1	0				2	4
1	17	30	0	0	0	0	1	0		1	1	1	1	1	1	1	1	1	1	1	1	1	1	1	1	1	1	2	1	1	1	4	1	5	2		Sosu	0	0	0	1	0				3	4
			0	0	0	0	0	0																														0	1	0	0	0
2	17	20	1	1	1	0	0	0		2	2	2	2	2	3	4	4	2	2	2	2	2	1	2	2	1	6	3	3	3	2	2	2	1	2		SOSU Aarhus	0	0	0	1	0				2	4
2	17	20	0	1	1	0	0	0		1	1	1	1	1	1	5	5	1	2	3	2	3	4	3	2	3	3	2	3	3	1	1	1	1	2		sosu Horsens	0	0	0	1	0				2	4
1	17	60	0	0	0	0	0	1	Motionsdag og bevægelse på arbejdsplads	3	2	3	2	4	2	4	4	2	2	2	2	4	2	4	2	5	5	2	3	3	1	1	2	2	5		Aarhus tech	0	0	0	1	0				4	4
1	18	60	0	0	0	0	0	0																														0	0	1	0	0				4	5
2	17	35	0	1	1	0	1	0		2	2	4	2	2	3	5	3	1	3	3	3	2	3	4	2	2	3	2	2	1	1	2	2	1	2		SOSU Herning	0	0	0	1	0				3	4
1	17	20	0	0	0	0	1	0		6	3	2	3	5	4	4	5	1	6	4	1	5	3	3	3	3	3	3	3	3	2	1	1	5	2		randers sosu	0	0	0	1	0				2	4
2	17	30	0	0	1	0	1	0		3	5	4	6	4	3	4	4	4	1	3	1	2	1	1	2	4	2	4	3	4	1	2	2	1	2		sosu vejle	0	0	0	1	0				3	4
1	17	30	0	0	1	0	0	0		3	2	4	3	4	3	5	5	1	3	3	1	2	4	2	4	1	2	2	4	4	1	2	2	2	5		Campus bornholm	0	0	0	1	0				3	4
1	16	30	0	0	1	0	0	0		3	3	3	3	5	3	4	3	3	2	3	3	1	4	5	4	4	5	2	3	3	1	2	4	1	5		Campus Bornholm	0	0	0	1	0				3	3
1	16	10	0	0	1	0	0	0		4	4	4	4	4	3	4	4	4	2	2	2	2	3	3	3	3	3	2	3	1	2	3	4	5	5		RØNNE	0	0	0	1	0				1	3
1	16	30	1	0	0	0	0	0		5	3	3	2	4	1	5	1	5	5	5	3	5	5	3	5	5	5	1	3	3	1							0	0	1	0	0				3	3
2	16	0	0	1	0	0	0	0																														0	0	1	0	0				1	3
1	17	35	0	0	1	0	0	0		3	3	3	1	2	1	5	3	3	1	1	2	1	3	2	6	3	6	1	1	4	2	3	2	1	5		EUC	0	0	0	1	0				3	4
2	18	20	1	1	0	1	0	0		4	4	4	3	3	1	2	2	3	3	3	3	3	4	4	3	3	2	1	4	3	1	2	2	3	2		Social- og sundhedskolen Esbjerg	0	0	0	1	0				2	5
2	16	15	1	0	1	1	1	0		2	2	2	2	5	4	4	4	2	2	1	1	3	3	4	2	2	3	2	3	3	3	6	2	3	2		Horsens	0	0	0	1	0				2	3
1	18	20	0	0	1	0	0	0		2	3	1	3	5	4	4	5	2	2	2	1	2	4	5	5	5	2	2	3	4	1	2	3	1	4		Tech	0	0	0	1	0				2	5
2	17	20	1	1	1	0	0	0		1	5	2	1	3	3	4	5	1	4	4	1	2	2	2	3	1	1	1	4	3	1	1	2	2	2		Randers social- og sundhedsskole	0	0	0	1	0				2	4
2	16	15	1	0	1	0	1	0		2	2	3	2	2	2	4	4	2	1	3	3	2	2	3	2	1	3	2	1	2	3	2	2	1	2		SOSU Horsens	0	0	0	1	0				2	3
2	17	10	0	1	0	0	0	0		2	4	3	2	6	6	6	5	2	2	2	4	3	6	6	6	2	6	2	2	5	1	5	3	1	2		sosu herning	0	0	0	1	0				1	4
1	17	0	0	1	0	0	0	0		3	5	3	3	5	3	5	4	3	3	3	3	3	2	2	4	4	3	1	2	3	1	2	4	4	5		Euc nordvestsjælland Holbæk	0	0	0	1	0				1	4
1	16	30	0	1	0	0	0	0		2	1	1	1	3	1	5	5	1	3	3	4	5	2	1	3	3	3	2	4	3	1	3	1	3	2		SOSU Esbjerg	0	0	0	1	0				3	3
2	16	35	0	1	0	1	1	0		2	3	3	3	5	1	2	3	3	3	3	3	3	3	3	2	2	3	1	3	3	2	2	3	4	2		SOSU Herning	0	0	0	1	0				3	3
2	18	10	0	0	1	1	0	0		3	2	2	3	2	2	4	4	3	2	3	2	3	3	6	6	6	6	2	4	3	1	2	2	1	5		Aarhus tech	0	0	0	1	0				1	5
2	18	30	1	1	1	1	0	0		2	1	2	1	6	2	5	6	1	2	2	3	5	1	1	1	1	1	4	1	2	1	3	3	1	2		sosu herning	0	0	0	1	0				3	5
2	17	10	0	1	1	1	0	0		1	1	1	1	4	3	5	6	1	1	1	4	1	3	3	1	2	4	2	1	2	3	2	1	1	2		Social- og sundhedsskolen Herning	0	0	0	1	0				1	4
1	100	50	1	0	0	0	0	0		4	5	4	4	5	3	5	3	4	4	3	3	4	3	3	3	3	3	1	2	3	2	3	2	5	5		Aarhus tech	0	0	0	1	0				4
1	17	60	0	0	1	1	1	0		1	2	3	1	6	3	5	6	1	6	6	6	6	4	3	3	4	4	2	4	3	1	1	4	1	5		euc nvs holbæk	0	0	0	1	0				4	4
2	17	30	0	1	0	0	0	0		1	1	1	3	1	1	4	5	1	2	1	1	1	1	2	1	2	1	2	3	2	1	3	2	1	2		sosu randers	0	0	0	1	0				3	4
2	18	15	0	0	1	1	0	0		2	1	6	3	3	3	4	6	2	2	3	2	2	2	6	2	2	2	4	3	3	3	3	3	1	2		Sosu Herning	0	0	0	1	0				2	5
			0	0	0	0	0	0																														0	1	0	0	0
2	17	30	1	0	0	0	0	0		3	3	3	3	4	4	3	5	3	3	4	3	2	2	2	2	2	3	3	3	4	3	2	2	1	2		Odense social- og sundhedskole	0	0	0	1	0				3	4
2	93	0	0	0	0	0	0	1	ALDRIG	5	5	5	5	5	5	5	5	5	5	5	5	5	5	5	5	5	5	2	4	1	2	5	5	5	6	STRIPPER	AALBORG TECH	0	0	0	1	0				1
1	18	5	1	0	1	0	0	0		5	2	5	5	3	5	2	2	5	5	5	5	5	3	2	3	4	4	2	2	2	1	1	3	1	5		EUCNVS	0	0	0	1	0				1	5
2	16	5	1	0	0	0	0	0		2	2	2	2	2	2	5	5	2	1	1	1	1	2	2	2	2	2	2										0	0	1	0	0				1	3
1	17	0	0	1	1	0	0	0		1	1	1	1	5	6	5	1	1	3	1	1	6	1	1	1	1	1	2	1	2	1	3	1	1	2		Social og sundhedsskolen Horsens	0	0	0	1	0				1	4
2	17	5	0	0	1	0	0	0		4	4	4	3	3	2	4	4	2	3	3	3	3	6	6	6	6	6	2	3									0	0	1	0	0				1	4
			0	0	0	0	0	0																														0	1	0	0	0
1	17	5	1	0	0	1	0	0		4	5	5	3	5	3	1	3	1	4	5	5	1	2	5	5	4	5	3	3	3	3	2	2	1	5		Aarhus tech	0	0	0	1	0				1	4
			0	0	0	0	0	0																														0	1	0	0	0
			0	0	0	0	0	0																														0	1	0	0	0
			0	0	0	0	0	0																														0	1	0	0	0
1	17	5	0	0	0	1	0	0		3	3	3	3	3	3	3	3	3	5	5	5	5	1	1	1	1	1	2	4	1	2	1	1	2	5		celf	0	0	0	1	0				1	4
2	16	30	0	0	1	0	0	0		1	2	5	3	5	5	3	6	3																				0	0	1	0	0				3	3
2	17	25	0	1	1	0	0	0		1	1	2	1	3	3	5	5	1	3	3	2	2	2	2	2	1	2	4	2	3	1	2	2	1	2		SOSU Randers	0	0	0	1	0				2	4
2	20	30	0	0	0	0	0	0																														0	0	1	0	0				3
			0	0	0	0	0	0																														0	1	0	0	0
1	16	5	0	0	1	0	0	0		1	1	1	1	1	1	5	5	1	2	1	1	1	3	3	3	3	3	3	1	1	1	1	2	1	5		euc	0	0	0	1	0				1	3
2	17	10	0	0	1	1	0	0		2	3	3	2	2	2	4	6	2	3	2	2	2	3	2	2	2	3	2	1	3	1	3	3	1	2		Sosu Horsens	0	0	0	1	0				1	4
2	16	15	0	0	1	0	0	1	Morgen-/eftermiddags motion	6	2	3	1	3	2	5	5	2	2	3	3	2	2	2	2	2	6	2	2	3	1	2	6	1	2		Sosu Aarhus	0	0	0	1	0				2	3
2	16	5	1	0	0	0	0	0		5	1	1	5	1	1	5	5	1	1	1	1	1	2	2	2	2	2	2	3	3	1	2	2	1	4		Aarhustrch	0	0	0	1	0				1	3
1	16	0	1	0	0	0	1	0		1	1	1	1	1	1	1	1	1																				0	0	1	0	0				1	3
2	16	25	0	1	1	0	0	0		3	2	3	1	4	3	3	5	1	3	2	1	2	1	1	1	1	1	1	3	4	3	2	3	1	2		Sosu Randers	0	0	0	1	0				2	3
1	16	30	1	0	1	0	0	0		1	3	3	2	4	3	4	3	2	2	3	2	3	4	3	4	1	6	2	2	3	1	1	2	1	5		euc	0	0	0	1	0				3	3
			0	0	0	0	0	0																														0	1	0	0	0
2	17	25	0	1	0	0	0	0		6	3	4	3	6	3	4	6	4	3	2	2	1	3	4	3	2	3	2	3	4	3	3	3	3	2		Sosu Herning	0	0	0	1	0				2	4
2	17	10	0	1	1	0	0	0		3	3	3	3	4	1	1	3	1																				0	0	1	0	0				1	4
2	16	30	0	0	1	0	1	0		2	2	3	2	4	3	5	4	2	3	2	1	3	2	6	2	2	2	2	3	3	3	3	3	1	2		SOSU	0	0	0	1	0				3	3
2	18	5	0	1	0	0	0	0		2	3	3	3	4	4	3	4	3	3	3	3	2	2	3	4	2	2	3	1	3	1	1	4	5	6	Sosu	Sosu fyn	0	0	0	1	0				1	5
2	16	10	0	0	1	0	0	1	Morgenaktivitet og eftermiddagsaktivitet	1	3	3	1	3	1	2	5	1	1	1	1	1	2	1	2	1	3	3	4	5	1	2	1	1	2		Sosu Aarhus	0	0	0	1	0				1	3
1	17	5	0	0	0	1	1	0		1	1	1	1	2	1	5	5	1	2	3	2	5	5	2	2	2	5	2	2	2	1	2	2	2				0	0	1	0	0				1	4
2	18	30	0	0	1	0	1	0		2	2	2	1	3	2	5	1	2	2	2	1	2	3	2	3	2	3	2	3	2	1	2	2	1	2		SOSU Aarhus	0	0	0	1	0				3	5
2	18	20	1	0	0	1	0	0																														0	0	1	0	0				2	5
1	16	5	0	0	1	0	0	0		1	3	3	1	3	2	4	4	2	3	1	1	2	1	2	2	3	3	2	2	3	1	2	2	2	5		Aarhus	0	0	0	1	0				1	3
1	17	0	0	0	0	0	0	1	Første del af gf1	1	1	1	1	6	1	1	5	1	2	3	6	3	5	5	1	5	5	1	3	4	1	1	4	1	5		Euc	0	0	0	1	0				1	4
1	17	10	1	1	1	0	1	0		4	3	2	2	2	2	3	2	2	4	5	3	2	3	5	3	6	3	4	2	2	3	2	3	2	2		aalborg tech	0	0	0	1	0				1	4
2	17	15	0	1	1	0	0	1	Morgenaktivitet	3	2	3	2	3	2	4	6	2	3	2	1	2	2	2	1	1	3	2	3	3	1	3						0	0	1	0	0				2	4
2	18	15	0	0	1	0	0	0		3	4	3	3	5	4	4	4	3	3	3	3	1	3	3	3	5	3	1	3	3	1	2	4	1	4		Aalborg tech food	0	0	0	1	0				2	5
1	17	60	1	0	0	1	1	0		3	1	1	1	4	1	5	5	1	3	1	1	1	3	3	2	6	6	2	2	2	1	3	1	1	5		EUC	0	0	0	1	0				4	4
			0	0	0	0	0	0																														0	1	0	0	0
1	17	20	0	0	0	0	1	0		3	4	5	3	5	2	4	5	2	2	2	2	2	1	3	2	4	4	1	4	3	3	2	4	1	5		Århus tech	0	0	0	1	0				2	4
1	17	40	0	0	1	0	0	0		2	3	3	1	4	3	4	3	2	2	3	3	2	3	3	2	3	5	2	2	2	2	2	2	1	5		EUC NORD frederikshavn	0	0	0	1	0				3	4
1	16	0	0	0	0	0	0	1	Ingen	2	1	2	1	2	2	5	1	1	4	1	4	3	1	2	1	2	5	2	4	5	2	5	2	1	5		Aarhus trch	0	0	0	1	0				1	3
2	18	25	1	1	1	0	1	0		5	2	5	2	2	5	5	5	1	3	1	2	1	3	3	2	3	2	2	2	3	1	3	2	1	2		Horsens Sosu	0	0	0	1	0				2	5
1	15	40	0	0	0	0	1	0		2	2	5	3	5	4	4	4	2	4	2	3	2	3	3	4	3	3	2	2	3	1	1	2	2	5		Aarhus Tech	0	0	0	1	0				3	2
			0	0	0	0	0	0																														0	1	0	0	0
2	17	10	0	0	1	0	1	0		4	3	5	1	4	3	4	4	1	1	1	1	4	1	5	1	5	5	2	4	3	1	2	2	1	2		SOSU skolen Horsens	0	0	0	1	0				1	4
2	17	5	0	0	1	0	0	0																														0	0	1	0	0				1	4
2	17	30	1	1	1	0	0	0		1	1	2	1	2	1	5	5	1	2	1	1	2	2	1	1	2	3	2	2	2	3	2	1	1	2		SoSu Horsens	0	0	0	1	0				3	4
1	16	15	0	0	1	0	1	0		1	1	1	2	1	1	5	6	1	1	1	1	2	1	2	2	1	1	1	2	3	1	3	2	2	2		SOSU Aarhus	0	0	0	1	0				2	3
2	17	15	0	1	0	0	1	0		1	2	2	1	3	3	3	5	1	2	2	1	3	2	1	1	2	2	2	3	3	1	2	3	1	6	Tandklinikassistent	Rybners teknisk skole	0	0	0	1	0				2	4
2	16	5	1	0	0	1	1	0		1	1	1	1	1	1	5	3	1	1	1	1	1	2	1	1	1	1	2	1	1	1							0	0	1	0	0				1	3
1	17	15	0	0	1	0	0	0		6	6	6	3	5	3	4	3	3	4	6	4	3	3	2	1	6	3	4	4	4	3	1	1	1	5		aarhus tech	0	0	0	1	0				2	4
2	17	15	0	0	1	1	0	1	Vi har nogle gange gået ture i skolen, når vi havde undervisning.	6	6	6	2	6	1	5	4	1	1	1	1	2	3	3	3	3	3	4	4	5	1	2	2	1	2		Horsens, SOSU	0	0	0	1	0				2	4
2	16	40	1	0	1	0	0	0		5	1	2	3	3	2	5	5	2	1	2	2	2	3	2	3	3	3	2	2	2	1	2	3	1	2		Social og Sunhedskolen	0	0	0	1	0				3	3
1	18	0	0	0	0	1	0	0		2	4	3	3	5	5	6	5	2	3	5	2	2	6	6	6	6	6	2	4	2	1	2	3	2	5		EUC nord	0	0	0	1	0				1	5
2	12	0	0	1	0	0	0	0		1	1	1	1	1	1	1	1	1	1	1	1	1	1	1	1	1	1	2	3	3	3	4	2	1	3		isral	0	0	0	1	0				1
1	17	20	0	0	0	1	0	0		6	2	3	3	6	3	5	4	3	3	6	2	4	2	2	2	6	6	3	3	2	3	2	2	5	5		Aarhus Tech	0	0	0	1	0				2	4
1	16	60	0	1	1	0	1	0		2	1	1	1	5	2	5	5	1	2	2	4	5	2	5	4	5	5	2	1	1	1	1	2	1	5		Aarhus Tech	0	0	0	1	0				4	3
2	17	10	1	0	0	1	1	0		2	3	3	2	2	2	4	4	2	2	2	1	3	4	3	4	4	5	3	3	3	1	1	4	1	5		Aarhus tech	0	0	0	1	0				1	4
2	16	20	0	0	1	0	0	0		3	5	5	3	5	1	4	5	5	1	1	1	1	1	4	2	5	3	1	4	5	1	1	1	5	4		Århus tech	0	0	0	1	0				2	3
1	18	0	0	0	0	0	0	1	Idræts dag	2	3	3	3	4	4	4	5	3	3	3	3	3	2	2	2	6	6	2	3	2	3	2	3	1	5		Aarhus tech	0	0	0	1	0				1	5
1	16	60	0	0	0	1	0	0		3	3	3	2	3	2	3	3	2	3	3	3	3	3	3	3	3	3	2	4	3	3	2	2	1	5		Aarhus tech	0	0	0	1	0				4	3
1	18	30	0	0	1	0	0	0		5	5	3	5	5	3	5	5	5	4	5	5	5	3	5	3	3	3	2	3	3	2	3	3	2	5		campus bornholm	0	0	0	1	0				3	5
1	16	15	0	0	0	1	1	0		3	3	2	3	3	2	4	4	3	2	3	1	3	3	3	2	1	3											0	0	1	0	0				2	3
1	16	30	0	0	1	0	0	0		2	3	2	2	3	3	5	5	2	3	2	2	3	3	3	3	2	3	2	1	2	1	2	3	2	5		Cambus Bornholm	0	0	0	1	0				3	3
1	16	30	1	0	0	0	1	0		1	1	1	1	1	1	5	5	1	1	1	1	1	3	3	3	3	3	2	3	3	1	2	1	1	5		Aarhus Tech	0	0	0	1	0				3	3
2	18	15	0	0	1	0	0	0		4	4	5	3	5	3	4	5	3	3	3	4	1	3	3	3	5	3	2	3									0	0	1	0	0				2	5
2	17	20	0	1	0	0	0	0		1	1	1	1	2	3	5	1	1	4	1	1	2	1	1	1	1	6	2	3	2	1	2	1	4	2		sosu esbjerg	0	0	0	1	0				2	4
1	16	60	0	0	0	0	0	1	gå mellem depot og projekter	5	6	5	6	6	1	5	4	6	5	5	3	2	1	3	2	5	6	2	3	3	3	1	2	1	5		århus tech	0	0	0	1	0				4	3
2	17	20	0	0	1	0	0	0		5	5	4	2	4	4	2	3	5	2	1	2	5	3	4	4	4	4	2	4	3	2	1	4	1	2		kolding	0	0	0	1	0				2	4
1	17	30	0	0	0	1	1	0		3	4	4	6	5	2	5	4	2	4	4	4	4	2	2	2	6	2	3	3	3	1	4	3	3	5		EUC	0	0	0	1	0				3	4
1	17	30	1	0	0	1	0	0		1	1	3	1	1	1	6	6	1	1	1	1	1	1	1	1	1	6	1	3	2	3	4	1	1	5		Aarhus tech	0	0	0	1	0				3	4
1	17	45	0	0	1	0	1	0		2	4	3	3	3	1	4	4	3	3	2	1	3	3	4	3	5	6	4	2	2	1	1	2	1	5		Tech	0	0	0	1	0				4	4
1	17	5	0	0	1	0	0	0		3	3	4	2	4	2	4	4	3	4	2	4	3	3	5	4	5	4	2	2	4	1	3	2	1	5		Aarhus tech hasselager alle	0	0	0	1	0				1	4
2	17	5	0	0	1	0	0	0		2	3	3	2	5	4	5	2	2	3	2	1	4	3	2	3	3	5	3	3	3	1	3	3	1	2		SOSU Horsens	0	0	0	1	0				1	4
1	17	30	0	0	1	0	0	0		2	4	4	3	5	4	3	3	4	3	1	1	5	2	2	3	2	2	2	4	3	1	2	3	1	5		campus bornholm	0	0	0	1	0				3	4
1	18	20	0	0	0	0	1	0		1	1	1	1	1	1	5	5	1																				0	0	1	0	0				2	5
1	18	60	0	0	0	0	1	1	Det fysiske arbejde	1	2	1	1	5	4	4	2	1																				0	0	1	0	0				4	5
			0	0	0	0	0	0																														0	1	0	0	0
2	17	10	0	0	1	0	0	0		2	1	1	2	2	3	5	5	1	3	2	2	3	2	3	2	2	3	2	2	3	1	1	2	1	2		SOSU Horsens	0	0	0	1	0				1	4
2	18	55	0	0	1	0	0	0																														0	0	1	0	0				4	5
2	18	30	0	0	1	1	0	0		2	2	3	3	3	1	5	5	2	2	1	1	4	3	2	3	4	5	3	2	3	1	3	3	1	2		Horsens	0	0	0	1	0				3	5
2	18	10	0	0	1	0	1	0		1	1	1	1	3	1	5	5	1	2	2	1	3	4	1	3	1	3	2	2	3	1	3	3	2	2		sosu horsnes	0	0	0	1	0				1	5
			0	0	0	0	0	0																														0	1	0	0	0
1	18	60	0	0	0	0	0	1	Værksted	6	3	5	6	5	6	6	6	5	5	5	5	5	6	6	2	6	6	4	4	5	2	3	2	1	5		CELF Nykøbing f	0	0	0	1	0				4	5
1	17	25	0	0	0	1	0	0		4	6	4	2	5	5	3	2	3	4	3	2	2	2	1	2	6	3	4	4	3	2	2	2	3	5		CELF	0	0	0	1	0				2	4
1	17	40	1	0	1	0	0	0		3	3	3	1	4	3	4	6	1	2	1	2	3	1	2	2	6	4	2	4	5	1	2	1	1	4		Aalborg tech	0	0	0	1	0				3	4
			0	0	0	0	0	0																														0	1	0	0	0
1	18	25	0	0	1	0	0	0		1	1	1	1	6	1	5	5	1	1	1	1	1	6	1	1	1	6	2	3	5	1	3	6	1	5		Bornholms erhvervskole rønne.	0	0	0	1	0				2	5
2	17	30	0	0	0	0	0	0																														0	0	1	0	0				3	4
2	17	5	0	1	0	1	0	0		3	3	4	3	5	4	4	4	3	3	3	3	2	3	2	2	6	1	3	3	3	1	2	2	1	5		celf nykøbing f.	0	0	0	1	0				1	4
1	16	0	0	1	0	0	0	0		3	2	2	4	2	2	3	3	2	3	1	2	4	3	3	2	6	1	4	2	2	3	2	3	1	5		Nykøbing	0	0	0	1	0				1	3
1	18	60	0	0	0	0	0	1	værksted	4	5	3	3	5	4	4	3	5	2	2	2	2	3	2	2	5	3	1	4	3	1	3	1	1	5		celf nykøbing f	0	0	0	1	0				4	5
			0	0	0	0	0	0																														0	1	0	0	0
2	17	30	0	0	0	0	0	1	Gårdbutik temaet	5	5	5	3	4	4	4	4	3	4	3	3	4	6	6	6	6	6	4	3	3	2	3	5	1	4		CELF Nykøbing Falster	0	0	0	1	0				3	4
			0	0	0	0	0	0																														0	1	0	0	0
1	16	10	0	1	0	1	1	0		2	3	3	2	5	5	3	3	3	5	4	6	4	6	6	6	6	6	3	1	3	3	2	2	5	5		Celf nykøbing f.	0	0	0	1	0				1	3
1	17	5	0	0	1	1	0	0		1	2	1	1	1	1	6	6	1	1	1	1	6	3	3	1	3	1	2	2	2	1	2	3	2	2		Sosu horsens	0	0	0	1	0				1	4
1	18	30	0	0	1	0	0	0		1	3	2	2	2	2	5	3	3	2	2	1	3	3	4	4	3	2	2	3	3	1	3	4	1	5		Campus Bornholm	0	0	0	1	0				3	5
1	17	0	0	1	0	0	0	0		3	6	6	6	6	6	1	6	1	6	6	1	6	1	2	6	6	3	1	1	2	1	3	2	1	5		Celf	0	0	0	1	0				1	4
1	17	10	0	0	0	1	0	0		2	3	3	2	3	4	4	3	3	4	3	4	4	3	3	2	3	3	3	2	2	2	3	3	5	5		EUC-NORD frederikshavn	0	0	0	1	0				1	4
2	18	30	0	1	0	0	1	0		3	3	3	5	5	4	2	1	4																				0	0	1	0	0				3	5
			0	0	0	0	0	0																														0	1	0	0	0
2	16	25	0	1	1	0	0	0		1	1	1	1	1	1	4	4	1	2	2	2	3	2	4	2	2	3	2	2	3	1	2	2	1	2		SOSU Kolding	0	0	0	1	0				2	3
1	17	0	1	0	1	1	1	0		1	2	1	1	5	1	5	5	1	1	1	1	3	3	1	6	2	6	2	4	5	1	3	2	2	5		campus bornholm	0	0	0	1	0				1	4
1	17	5	0	0	0	1	0	0		2	2	3	3	3	3	3	3	3	2	2	2	3	2	2	2	6	6	3	1	3	2	2	2	2	5		EUC nord frederikshavn	0	0	0	1	0				1	4
1	16	25	1	0	1	1	1	0		3	3	3	3	3	3	2	3	3	3	3	3	3	3	3	3	3	3	3	2	3	3	6	6	1	5		eucnv	0	0	0	1	0				2	3
1	16	10	0	0	1	0	0	0		2	2	1	1	3	2	5	5	1	1	1	2	2	2	1	2	3	3	2	1	2	1	2	2	5	5		Campus Bornholm EUD	0	0	0	1	0				1	3
2	18	10	0	0	1	0	0	0		5	5	5	5	5	3	2	6	6	6	6	3	6	2	6	6	6	6	1	3	3	2	2	3	1	2		Sosu Fyn, afdeling syd	0	0	0	1	0				1	5
1	16	40	0	0	0	0	1	0		1	1	1	2	2	1	5	5	2	1	1	1	2	5	5	4	5	5	2	2	1	1	3	3					0	0	1	0	0				3	3
1	17	5	0	0	0	1	0	0		2	2	2	3	3	3	2	3	3	3	3	3	3	2	2	2	2	2	1	1	2	2	2	3	2	5		Euc Nord Frederikshavn	0	0	0	1	0				1	4
2	17	50	1	0	0	1	1	0		2	3	2	2	3	3	5	4	2	4	3	3	3	3	2	2	3	6	2	1	2	1	3	3	3	5		EUC SYD sønderborg	0	0	0	1	0				4	4
1	17	60	0	0	0	0	0	1	Motionsdag og bevægelse på arbejdsdag	2	1	2	1	3	1	5	6	1	5	2	1	3	2	4	4	5	5	3	2	2	2	2	1	1	5		Århus tech	0	0	0	1	0				4	4
2	16	15	0	1	0	0	1	0		1	1	3	1	1	1	4	3	3	2	3	2	2	2	2	3	2	3	2	3	3	1	2	2	2	2		Social & sundhedsskolen Fyn	0	0	0	1	0				2	3
1	17	30	0	0	0	1	1	0		3	4	4	4	2	1	2	3	3	4	3	3	4	3	6	3	6	6	1	4	4	3	3	2	1	5		Celf nyk f	0	0	0	1	0				3	4
1	17	60	0	0	0	1	0	1	Værksted	3	2	4	3	3	4	3	2	3	3	2	3	5	2	3	3	5	5	3	4	3	2	2	2	4	5		Celf Nykøbing	0	0	0	1	0				4	4
1	18	15	0	0	0	1	0	0		1	6	1	1	6	1	1	1	6	1	1	1	1	1	1	1	1	1	1	2	1	2	1	1	5	5		Celf Nykøbing F	0	0	0	1	0				2	5
			0	0	0	0	0	0																														0	1	0	0	0
2	18	30	0	1	0	0	0	0																														0	0	1	0	0				3	5
			0	0	0	0	0	0																														0	1	0	0	0
1	18	20	0	0	1	0	0	0		3	3	3	3	6	3	6	6	3	6	3	3	6	3	6	3	6	6	4	3	2	1	2	3	1	5		Campus Bornholm	0	0	0	1	0				2	5
2	16	40	1	0	1	0	1	0		2	4	6	3	4	4	5	2	3	1	1	1	1	1	2	4	2	1	2	3	3	2	2	1	3	2		Sosu Horsens	0	0	0	1	0				3	3
2	17	15	0	0	1	0	0	0		3	3	3	3	3	3	3	3	3	3	2	3	2	3	3	3	3	4	2	3	3	1	3	3	1	2		Vejle	0	0	0	1	0				2	4
			0	0	0	0	0	0																														0	1	0	0	0
2	18	15	1	1	1	0	1	0		1	1	2	1	1	1	5	5	1	2	2	1	2	1	1	3	1	2	2	1	1	1	2	1	1	2		SOSU Horsens	0	0	0	1	0				2	5
1	18	60	0	0	1	0	0	0		2	1	1	2	1	1	5	1	1	2	3	2	1	2	2	2	1	2	2	2	2	1	2	2	1	2		Sosu Horsens	0	0	0	1	0				4	5
2	18	30	1	1	1	0	0	0																														0	0	1	0	0				3	5
			0	0	0	0	0	0																														0	1	0	0	0
1	18	25	0	0	1	0	0	0		2	6	6	6	6	2	6	5	2	1	1	1	1	4	4	4	4	4	4	3	3	3	3	3	1	5		Campus bornholm	0	0	0	1	0				2	5
			0	0	0	0	0	0																														0	1	0	0	0
1	16	45	1	1	1	0	1	0										1																				0	0	1	0	0				4	3
2	18	15	0	0	1	1	0	0		1	3	3	4	3	3	5	5	1	1	2	3	2	2	2	2	2	6	3	3	3	3	2	3	1	6	ssa	kolding	0	0	0	1	0				2	5
2	16	20	0	0	1	1	0	0																														0	0	1	0	0				2	3
2	17	25	0	1	1	1	0	0		2	2	2	2	4	2	5	2	2	2	2	2	3	1	1	1	1	2	2	3	3	3	2	1	1	2		SOSO Aarhus	0	0	0	1	0				2	4
1	17	25	1	0	1	0	1	0		6	5	3	3	5	2	4	4	6	3	3	1	1	5	1	4	2	6	2	3	3	2	2	2	1	5		Cambus Bornholm EUD	0	0	0	1	0				2	4
2	17	5	0	1	1	1	0	0		1	1	1	1	1	1	5	5	1	1	1	1	1	1	1	1	1	2	2	4	3	1	1	1	5	2		Sosu	0	0	0	1	0				1	4
1	17	10	0	0	1	1	0	0		2	3	2	1	5	3	4	4	1	1	3	2	3	2	5	4	5	5	2	3	3	1	2	2	2	5		Aarhus Tech	0	0	0	1	0				1	4
2	18	5	0	0	1	0	0	0		1	1	2	1	5	4	5	2	2	3	1	1	4	3	2	3	3	5	2	3	2	1	4	3	1	2		SOSU Horsens	0	0	0	1	0				1	5
1	17	10	0	0	1	1	0	0		5	5	5	4	5	3	1	1	3	3	3	2	2	4	2	3	3	4	3	4	5	2	2	4	5	5		Bornholms erhvervskole	0	0	0	1	0				1	4
1	16	10	1	0	0	0	0	0		1	2	3	2	1	1	5	4	1	2	2	2	2	3	3	3	4	4	3	3	3	1							0	0	1	0	0				1	3
2	17	15	1	0	1	0	0	1	morgen- og eftermiddagsaktivitet	1	2	1	1	2	2	4	5	1	1	1	1	3	1	1	1	3	2	3	2	3	1	3	1	2	2		SOSU Aarhus	0	0	0	1	0				2	4
1	17	25	0	0	1	0	0	0		2	2	1	2	2	2	4	4	1	1	1	1	1	3	2	2	1	2											0	0	1	0	0				2	4
1	19	45	0	0	1	0	0	0		1	3	2	6	6	2	5	5	2	2	2	1	3	3	2	3	1	6	2	4	4	1	2	3	1	5		Campus Bornholm	0	0	0	1	0				4	6
1	16	15	0	0	1	0	0	0		3	4	6	2	4	3	4	4	3	3	3	2	4	3	6	3	3	6	4	4	3	2	2	3	1	5		Campus Bornholm	0	0	0	1	0				2	3
2	18	20	0	0	1	0	0	0		6	3	5	1	5	4	4	5	3	1	1	2	2	2	1	2	2	2	3	3	3	2	2	2	1	2		Sosu aarhu	0	0	0	1	0				2	5
1	18	0	0	0	0	0	0	1	i timerne	3	3	3	2	3	2	2	3	4	3	3	3	2	3	3	2	6	3	4	3	4	1	1	2	2	5		EUC NORD Frederikshavn	0	0	0	1	0				1	5
1	12	0	0	0	0	0	1	0		3	2	1	1	5	3	4	3	1	2	3	4	4	2	2	2	2	3	1	3	3	2	6	5	1	6	Nix	Nix	0	0	0	1	0				1
1	16	0	1	0	1	0	1	0		1	4	3	3	4	2	4	4	2	3	3	3	3	3	3	3	2	2	2	3	1	3	3	2	5	5		Campus Bornholm Erhversskole	0	0	0	1	0				1	3
			0	0	0	0	0	0																														0	1	0	0	0
2	17	20	1	0	1	0	0	0		3	3	2	1	4	3	4	5	1	1	1	1	3	2	2	2	2	2	4	3	3	1	6	2	1	2		SOSU Aarhus	0	0	0	1	0				2	4
			0	0	0	0	0	0																														0	1	0	0	0
			0	0	0	0	0	0																														0	1	0	0	0
2	17	25	1	0	1	0	0	0		2	3	2	2	3	2	5	4	2	3	3	3	3	6	3	3	3	3	2	3	3	1	4	3	1	2		SOSU Kolding	0	0	0	1	0				2	4
1	18	10	0	0	0	0	1	0		5	5	6	6	6	6	5	5	6	4	4	4	4	4	4	4	4	4	3	3	2	2	3	1	1	5		EUC NORD	0	0	0	1	0				1	5
2	17	25	0	0	1	1	0	0		1	1	1	3	3	3	5	5	1	2	3	1	4	3	4	3	2	3	1	3	2	1	2	4	2	2		Eux Holbæk	0	0	0	1	0				2	4
2	16	30	0	1	1	0	0	0		1	1	1	2	2	1	5	5	3	1	1	1	2	4	3	3	1	1	2	3	2	2	2	2	1	2		SOSU Aarhus	0	0	0	1	0				3	3
2	17	25	0	1	0	0	0	0		3	3	2	2	3	2	3	5	1	3	3	2	3	2	3	2	2	3	2	3	2	1	2	2	1	2		SOSU Esbjerg	0	0	0	1	0				2	4
1	16	45	0	1	1	0	0	0		1	3	3	1	3	3	3	3	1	3	3	3	3	2	2	2	6	3	3	4	2	3	3	2	1	5		Aarhus Tech	0	0	0	1	0				4	3
2	17	15	1	0	1	0	0	1	morgen aktivitet	1	1	1	1	2	1	6	6	1	1	1	1	1	1	3	2	1	2	3	3	3	1	3	3					0	0	1	0	0				2	4
1	17	25	0	0	1	0	0	0		2	3	2	1	4	3	6	2	1	2	1	1	1	2	1	1	1	1	2	2	3	1	2	1	1	5		holbæk	0	0	0	1	0				2	4
1	18	30	1	0	1	0	1	0		1	1	1	1	2	1	5	5	1	1	1	1	1	1	1	1	1	1	2	3	2	1	2	1	1	2		SOSU skolen i horsens	0	0	0	1	0				3	5
1	17	20	1	0	1	0	1	0		3	2	3	2	3	4	5	4	2	2	4	1	4	3	1	3	4	6	4	2	2	1	2	4	1	5		EUC Nordvestsjælland	0	0	0	1	0				2	4
			0	0	0	0	0	0																														0	1	0	0	0
1	18	15	0	1	1	0	0	0		1	1	1	1	1	1	1	1	1	1	1	1	1	1	1	1	1	1	2	3	2	1	1	2	5	5		sosu	0	0	0	1	0				2	5
2	18	10	0	1	1	0	0	0		1	1	1	2	1	1	5	5	1	1	3	1	2	3	5	3	3	5	2	2	3	1	1	3	1	2		SOSU Horsens	0	0	0	1	0				1	5
			0	0	0	0	0	0																														0	1	0	0	0
1	16	5	1	1	0	0	0	0		2	3	3	2	5	3	4	5	2	4	2	4	4	2	3	3	3	2	1	3	4	1	2	2	4	2		Sosu fyn	0	0	0	1	0				1	3
			0	0	0	0	0	0																														0	1	0	0	0
2	17	5	0	1	0	0	0	0		1	1	1	1	2	1	6	5	2	4	2	3	1	5	3	5	2	5	1	3	3	1	2	3	5	2		Sosu	0	0	0	1	0				1	4
			0	0	0	0	0	0																														0	1	0	0	0
1	16	20	1	0	0	0	0	0		2	2	2	2	2	3	4	5	2	2	2	2	2	3	3	3	4	3	2	3	3	1	3	2	1	5		Euc nord	0	0	0	1	0				2	3
2	16	10	1	0	0	1	0	0		3	2	2	2	3	1	4	5	1	2	2	2	2	3	2	2	3	2	3	3	3	1	1	2	3	2		Sosu	0	0	0	1	0				1	3
			0	0	0	0	0	0																														0	1	0	0	0
2	18	45	0	0	1	0	1	0		2	2	2	1	2	1	5	5	1	2	2	2	2	2	1	1	3	3	2	2	2	1	2	2	1	2		sosu Frederica-Vejle-Horsens	0	0	0	1	0				4	5
			0	0	0	0	0	0																														0	1	0	0	0
2	17	20	0	1	1	0	0	0		2	2	2	1	3	3	5	6	2	2	1	2	3	2	2	3	2	6	1	4	4	3	2	1	5	2		Randers social- og sundhedsskole	0	0	0	1	0				2	4
1	16	35	0	0	1	0	0	0		3	2	3	3	6	2	3	5	3	1	1	1	2	2	3	1	4	3	4	4	3	3	2	3	1	5		EUC syd Sønderborg	0	0	0	1	0				3	3
			0	0	0	0	0	0																														0	1	0	0	0
1	17	60	0	0	1	0	1	0		1	1	1	1	1	1	1	1	1	5	5	5	5	6	1	6	1	1	2	1	1	1	3	2	1	5		skive teknisk skole	0	0	0	1	0				4	4
2	16	10	0	1	1	0	0	0		2	4	3	2	5	4	6	3	3	3	2	2	3	2	2	2	2	2	2	4	3	3	2	1	1	2		SOSU	0	0	0	1	0				1	3
2	17	40	0	0	1	0	0	0		3	3	6	6	6	2	6	6	2	6	2	6	2	2	3	3	6	6	2	4	4	1	3	2	1	6	Food College	Tech College	0	0	0	1	0				3	4
1	17	20	0	0	1	1	0	0		3	5	4	4	5	5	4	1	5	3	4	3	5	3	3	5	1	5	1	3	5	2	2	5	5	5		campus bornholm	0	0	0	1	0				2	4
1	17	45	0	1	0	1	0	0		1	2	3	1	1	1	6	6	1	3	1	1	1	3	1	2	2	1	1	1	3	1	2	2	1	4		Tech	0	0	0	1	0				4	4
2	17	20	1	0	0	0	0	0		2	3	3	1	4	3	5	5	1	3	2	3	3	2	1	1	2	1	2	3	3	1	2	1	4	2		Sosu fyn	0	0	0	1	0				2	4
1	16	60	1	1	1	1	1	0		2	3	4	2	3	3	4	4	3	3	3	2	3	3	2	2	2	4	2	3	2	1	1	2	1	5		EUC Nord Frederikshavn	0	0	0	1	0				4	3
			0	0	0	0	0	0																														0	1	0	0	0
2	18	20	0	1	0	0	0	0		2	3	4	3	5	5	5	6	2	4	3	4	4	3	3	2	6	2	3	1	1	1	3	3	1	2		Sosu Fyn	0	0	0	1	0				2	5
1	17	10	0	1	1	0	0	1	i timerne	3	3	4	3	4	4	4	4	4																				0	0	1	0	0				1	4
			0	0	0	0	0	0																														0	1	0	0	0
1	17	20	0	1	0	1	0	0		1	3	3	3	5	1	5	3	1	4	2	2	2	2	3	6	3	2	1	3	2	1	3	3	1	2		Sosu Fyn	0	0	0	1	0				2	4
1	17	60	0	0	0	0	1	0		2	3	3	2	6	6	3	6	2	3	3	2	6	3	2	3	6	6	2	4	3	1	3	2	1	5		Aarhus tech	0	0	0	1	0				4	4
			0	0	0	0	0	0																														0	1	0	0	0
1	17	60	0	0	0	0	1	0		5	4	5	5	3	6	1	4	5	3	4	4	4	2	2	2	3	2	2	2	1	2	3	3	5	5	Smed	euc Holbæk	0	0	1	0	0				4	4
1	16	10	0	0	0	0	1	0		1	2	1	1	5	4	5	1	1	1	1	1	1	2	3	1	3	3	2	3	3	1	1	1	1	5		EUC Sønderborg	0	0	0	1	0				1	3
1	16	20	0	0	1	0	0	0		3	5	4	4	4	3	6	3	4	2	1	2	4	3	3	2	3	5	3	3	2	3	2	3	2	2		sosu	0	0	0	1	0				2	3
1	16	15	0	1	0	1	1	0																														0	0	1	0	0				2	3
2	17	25	0	1	0	1	0	0		2	2	2	2	4	2	4	4	2	2	2	2	3	2	2	2	1	1	2	3	3	1	2	2	1	2		SOSU Randers	0	0	0	1	0				2	4
1	17	5	1	0	0	0	0	0		1	2	2	2	2	2	5	5	2	2	5	1	2	2	1	2	6	6	2	3	2	1	2	2	1	5		Mercantec	0	0	0	1	0				1	4
2	18	10	0	0	1	0	1	0		2	3	3	1	4	3	5	5	1	2	5	1	3	4	3	2	4	5	2	3	3	1	2	2	1	2		SOSU Kolding	0	0	0	1	0				1	5
2	18	35	0	1	1	0	0	0		1	1	1	1	1	1	5	1	1	2	2	2	2	3	2	2	2	1	1	4	4	1	2	2	1	2		SOSU RANDERS	0	0	0	1	0				3	5
1	16	5	0	0	1	0	0	0		4	3	4	4	4	3	4	3	3	3	3	3	2	2	3	3	4	4	4	3	2	2	2	4	1	5		aarhus tech	0	0	0	1	0				1	3
2	17	30	1	0	0	1	1	0		2	3	3	3	2	3	5	4	3	3	2	3	2	3	1	3	6	6	4	4	4	3	3	2	1	4		Agri College	0	0	0	1	0				3	4
			0	0	0	0	0	0																														0	1	0	0	0
1	16	30	0	0	1	0	0	0		2	5	3	1	5	2	4	3	3	3	5	3	3	2	3	1	4	2	2	3	3	1	2	3	1	5		Skive Tekniske Skole	0	0	0	1	0				3	3
2	16	10	1	0	0	1	0	0		2	2	3	3	4	3	5	4	2	1	2	2	3	3	2	2	2	2	2	3	2	1	2	2	1	2		Social og sundhedsskolen fyn	0	0	0	1	0				1	3
2	18	60	0	0	1	1	0	0		1	1	1	1	1	3	5	5	1	1	1	1	5	1	4	4	2	5	2	2	2	1	1	1	2	2		SOSU	0	0	0	1	0				4	5
2	18	10	0	1	1	0	0	0		3	3	2	2	3	3	5	5	3	2	2	2	1	2	1	2	1	2	4	4	3	3	2	2	1	2		SOS- horsens	0	0	0	1	0				1	5
2	17	35	0	0	1	0	0	0		2	2	2	2	2	3	2	2	2	3	3	3	3	3	3	3	4	3	2	4	3	2	2	2	1	5		Holbæk EUC	0	0	0	1	0				3	4
2	16	45	0	0	1	0	0	0		3	3	6	4	5	5	3	6	3	3	1	1	1	3	3	3	5	3	1	1	2								0	0	1	0	0				4	3
1	17	20	0	0	1	0	0	0		2	3	3	2	5	2	5	5	2	3	3	3	2	1	2	2	1	2	2	4	3	1	2	2	1	5		Skive Tekniske skole	0	0	0	1	0				2	4
			0	0	0	0	0	0																														0	1	0	0	0
1	16	10	0	0	0	0	0	1	en gang imelem i timerne	2	3	3	2	5	4	3	4	2	2	2	2	3	2	2	2	4	2	3	2	2	2	2	2	1	5		celf	0	0	0	1	0				1	3
1	17	20	0	0	1	0	0	0		2	2	2	2	3	3	5	6	2	2	2	2	2	2	2	2	2	2	2	3	2	1	2	2	1	5		Skive teknisk	0	0	0	1	0				2	4
			0	0	0	0	0	0																														0	1	0	0	0
2	17	30	0	1	0	0	0	0		1	1	3	1	3	2	5	5	1	6	1	1	3	6	4	6	5	1	2	2	2	1	2	3	1	4		Aalborg Tech Agri College	0	0	0	1	0				3	4
1	17	20	0	0	0	0	1	0		3	4	4	4	3	2	3	4	3	2	3	2	2	3	2	2	2	5	3	3	3	3	2	3	2	5		Sønderborg	0	0	0	1	0				2	4
1	18	25	0	0	1	0	0	0		2	3	2	3	3	3	5	6	2	3	3	3	3	3	3	2	2	6	2	4	3	3	2	2	1	5		EUC Nord, Frederikshavn	0	0	0	1	0				2	5
2	17	15	0	1	1	1	0	0		2	2	2	2	1	1	2	1	2	1	1	1	1	1	2	3	1	1	1	2	2	1	2	1	1	2		sosu randers	0	0	0	1	0				2	4
			0	0	0	0	0	0																														0	1	0	0	0
1	16	40	0	1	0	0	0	0		2	3	6	3	6	3	3	4	3	3	3	3	3	3	3	3	3	3	1	3	4	2	3	3	1	5		EUC nord	0	0	0	1	0				3	3
1	16	30	0	0	0	0	1	0		3	3	3	3	3	3	3	3	3	3	3	3	3	3	3	3	3	3	1	3	3	2	3	3	1	5		Århus	0	0	0	1	0				3	3
2	17	15	1	0	0	0	0	0		2	2	2	1	3	3	5	5	1	3	2	1	2	2	2	2	2	3	2	3	2	1	1	2	1	2		Sosu Esbjerg	0	0	0	1	0				2	4
1	17	55	0	0	1	0	0	0		3	2	1	1	3	1	5	5	1	3	1	1	2	3	3	3	6	3	2	1	2	2	2	2	2	5		Skive tekniske skole	0	0	0	1	0				4	4
			0	0	0	0	0	0																														0	1	0	0	0
1	53	45	0	0	1	0	0	0		1	2	1	2	1	2	5	5	1	2	2	2	2	3	2	3	3	3	2	3	3	1	3	2	1	5		euc nord	0	0	0	1	0				4
2	18	60	0	0	1	0	0	0		5	6	6	2	6	3	6	6	3	4	4	4	4	2	1	1	6	2	2	4	4	1	3	3	3	4		Tech College	0	0	0	1	0				4	5
1	17	0	0	0	0	0	0	1	gåtur	2	5	3	2	5	3	5	4	3	5	2	3	5	2	3	2	6	6	2	3	3	2	2	2	2	5		Euc nord Frederikshavn	0	0	0	1	0				1	4
2	17	5	0	0	1	0	1	0		2	3	3	4	3	2	5	4	2	3	5	3	3	2	2	2	2	4	2	4	3	1	3	3	1	2		horsens	0	0	0	1	0				1	4
2	17	20	0	0	1	1	0	0		4	5	4	3	3	4	5	3	3	4	3	1	5	2	5	2	2	3	1	3	4	2	1	3	1	2		SOSU Vejle	0	0	0	1	0				2	4
			0	0	0	0	0	0																														0	1	0	0	0
			0	0	0	0	0	0																														0	1	0	0	0
2	17	60	0	0	1	0	1	0		1	3	1	1	4	1	5	1	1	1	1	1	3	5	4	3	1	2	2	2	3	1	3	4	5	2		Sosu vejle	0	0	0	1	0				4	4
2	17	5	0	0	0	0	0	0																														0	0	1	0	0				1	4
1	17	30	0	0	0	0	0	1	En gang i mellem	2	2	2	2	5	2	6	6	2	3	3	1	4	2	3	2	6	6	2	3	3	1	3	2	4	5		Euc syd	0	0	0	1	0				3	4
1	17	10	0	0	0	0	0	1	Vi går ud og spiller et eller anden en gang imellem	2	1	2	1	4	1	5	5	1	1	2	1	2																0	0	1	0	0				1	4
2	18	15	0	1	1	1	0	0		1	1	2	2	3	3	6	6	2	2	2	2	2	6	2	6	6	2	2	3	4	1	4	1	1	2		sosu	0	0	0	1	0				2	5
1	17	20	1	0	1	0	0	0		3	1	2	3	4	3	5	5	3	4	3	2	3	2	2	2	5	5	2	2	2	1	2	3	5	5		euc nordvestsjælland	0	0	0	1	0				2	4
1	16	30	1	0	1	0	0	0		3	5	4	3	4	2	4	3	2	3	3	1	3	3	3	3	4	2	2	3	4	1	1	2	1	5		euc nord frederikshavn	0	0	0	1	0				3	3
			0	0	0	0	0	0																														0	1	0	0	0
			0	0	0	0	0	0																														0	1	0	0	0
			0	0	0	0	0	0																														0	1	0	0	0
			0	0	0	0	0	0																														0	1	0	0	0
2	17	10	1	1	1	0	0	0		5	3	3	2	4	4	4	3	3	2	2	1	4	3	2	2	1	2	1	4	5	3	3	4	1	2		SOSU Randers	0	0	0	1	0				1	4
1	16	25	1	0	0	0	0	0		2	3	3	4	2	3	5	3	3	3	2	2	3	2	3	4	4	5	2	3	3	1	2	3	1	5		EUC syd Sønderborg	0	0	0	1	0				2	3
2	17	10	0	1	1	0	0	0		3	1	3	3	3	1	5	4	2	2	1	1	3	2	2	2	2	3	1	4	3	1	2	2	2	2		SOSU horsens	0	0	0	1	0				1	4
2	16	15	0	1	0	0	0	0		4	3	3	1	3	1	5	4	2	3	3	2	2	1	1	2	1	1	2	1	1	1	1	1	2	2		Sosu Odense	0	0	0	1	0				2	3
			0	0	0	0	0	0																														0	1	0	0	0
1	18	30	1	0	1	1	1	0		4	3	3	2	5	3	2	3	2	3	3	3	3	4	4	4	3	4	1	3	3	2	2	2	3	5		Cabh	0	0	0	1	0				3	5
			0	0	0	0	0	0																														0	1	0	0	0
			0	0	0	0	0	0																														0	1	0	0	0
2	18	10	0	1	1	1	1	0		3	3	3	2	5	4	5	4	3	3	4	2	2	3	1	1	2	2	1	3	3	2	2	2	2	2		SOSU Horsens	0	0	0	1	0				1	5
1	17	15	0	0	1	0	0	0		4	5	5	3	5	4	4	2	5	2	3	2	3	3	2	3	6	6	1	4	4	3	3	3	1	5		Skive Tekniske Skole	0	0	0	1	0				2	4
2	17	5	0	0	1	0	0	0		3	3	4	3	3	3	3	2	4	3	3	4	3	3	3	3	6	6	4	4	3								0	0	1	0	0				1	4
2	18	35	1	0	1	1	1	0		3	1	1	1	1	1	4	3	2	3	4	2	2	2	1	3	6	5	3	1	3	1	3	1	5	6	Byg et hus	Eucnvs	0	0	0	1	0				3	5
2	17	20	0	0	1	0	0	0		3	3	3	3	3	2	3	4	3	3	3	3	3	3	3	3	2	3	4	1	3	3	3	2	4	2		Sosu vejle	0	0	0	1	0				2	4
1	17	30	0	0	1	0	0	0		1	1	1	1	1	1	5	5	1	5	4	4	4	2	2	2	6	2	2	1	1	1	3	2	1	5		Skive tekniske skole	0	0	0	1	0				3	4
2	16	5	1	0	1	1	1	0		2	2	2	2	2	1	2	2	2	2	2	2	2	1	1	1	1	1	2	1	1	2	1	2	1	2		Sosu Vejle	0	0	0	1	0				1	3
1	17	30	0	0	1	0	0	0		1	1	1	1	1	1	5	5	1	1	1	1	1	1	1	1	1	1	2	2	3	1	1	1	1	5		Skive tekniske skole	0	0	0	1	0				3	4
			0	0	0	0	0	0																														0	1	0	0	0
1	17	5	1	1	1	1	0	0		2	2	2	2	3	2	5	5	2	3	3	3	3	3	3	3	2	1	2	1	3	1	2	2	2	2		sosu horsens	0	0	0	1	0				1	4
2	18	20	1	0	0	0	0	0		2	3	3	2	3	3	5	4	3	3	2	2	3	3	3	3	2	3	3	4	3	1	3	2	3	2		SOSU	0	0	0	1	0				2	5
2	17	15	0	0	1	1	0	0		3	3	4	3	3	3	4	6	3	4	3	2	2	3	4	3	3	3	4	3	3	1	2	3	5	2		Sosu Vejle	0	0	0	1	0				2	4
1	18	60	0	0	0	0	1	0		4	1	3	3	3	3	3	3	3	3	3	3	3	2	2	2	2	3	2	1	1	1	1	1	5	5		Htx	0	0	0	1	0				4	5
1	17	25	0	0	0	1	0	0		3	3	4	3	4	4	5	5	3	3	3	3	3	3	2	2	3	3	2	3	4	3	2	3	1	6	strøm styring og IT og miljørigtig byggeri	EUC Syd sønderborg	0	0	0	1	0				2	4
2	17	5	0	1	0	0	0	0		1	1	2	2	6	3	6	3	2	3	1	1	3	1	6	6	6	6	1	3	4	3	1	3	1	2		Sosu Fyn	0	0	0	1	0				1	4
2	16	10	0	0	0	1	0	1	Motionsdag	6	6	6	6	6	6	6	6	6	6	6	3	6	3	4	2	5	6	3	3	4	1	3	2	3	5		Aarhus Tech	0	0	0	1	0				1	3
1	17	5	0	0	1	0	0	0		1	1	1	1	1	2	5	5	1	4	2	5	2	4	5	5	3	2	2	1	1	1	2	3	1	2		SOSU Horsens	0	0	0	1	0				1	4
1	17	60	0	0	1	0	0	0		2	2	2	2	5	2	5	1	2	3	4	3	3	2	2	2	2	2	2	2	2	1	2	2	1	5		Skive	0	0	0	1	0				4	4
1	17	30	0	0	1	0	0	0		2	2	2	1	4	2	4	6	2	5	2	2	3	3	3	3	3	3	2	3	4	1	2	2	2	5		Skive teknisk skole	0	0	0	1	0				3	4
			0	0	0	0	0	0																														0	1	0	0	0
1	16	0	0	0	0	1	0	0																														0	0	1	0	0				1	3
1	18	0	0	1	0	1	0	0		3	3	4	1	3	2	5	5	3	6	4	6	6	2	6	6	5	6	2	3	4	1	2	3	1	5		celf	0	0	0	1	0				1	5
2	18	45	0	1	1	0	0	0		1	2	1	1	2	1	5	5	1	2	2	1	3	2	2	4	2	2	2	3	3	1	3	1	2	2		SOSU Randers	0	0	0	1	0				4	5
2	19	20	0	0	1	0	0	0		2	3	1	4	2	2	2	4	2	2	2	3	2	3	2	2	2	1	2	2	3	1	2	2	1	3		Odense	0	0	0	1	0				2	6
			0	0	0	0	0	0																														0	1	0	0	0
1	16	0	0	0	0	0	0	1	en gang imellem i matematik	2	3	3	1	5	2	5	5	1	2	2	1	1	3	2	2	6	3	1	3	3	1	2	3	5	5		Celf	0	0	0	1	0				1	3
1	17	0	0	1	0	0	0	0		1	5	5	3	5	5	1	1	3	3	3	5	3	3	3	3	3	3	3	4	3	2	1	5	3	5		CELF - Nykøbing F.	0	0	0	1	0				1	4
1	17	10	0	0	0	0	1	0		1	1	1	1	1	1	1	1	1	1	1	1	1	3	3	3	3	3	2	2	2	2	2	3	1	5		Viborg	0	0	0	1	0				1	4
2	54	0	0	0	0	0	0	0																														0	0	1	0	0				1
1	18	45	0	1	0	0	0	0		1	1	1	1	4	1	5	1	1	2	2	2	3	2	2	2	5	2	2	1	1	1	1	2	1	5		EUC Nord Frederikshavn	0	0	0	1	0				4	5
2	17	30	0	0	1	1	0	0		2	2	3	2	5	4	5	4	2	3	3	3	4	3	2	2	2	1	4	2	2	1	3	3	2	2		Sosu Esbjerg	0	0	0	1	0				3	4
1	18	0	0	1	0	0	0	0		3	1	3	1	4	1	5	6	1	1	1	1	1	3	1	1	6	2	2	1	2	1	1	1	1	5		celf nykøbing falster	0	0	0	1	0				1	5
1	18	10	1	1	0	0	0	0		1	3	2	2	4	3	5	5	1	1	4	2	3	2	1	2	1	6	2	3	2	1	2	5	1	2		SOSU Fyn	0	0	0	1	0				1	5
1	17	25	0	1	1	0	0	0		4	3	4	3	4	4	5	2	3	3	3	4	3	5	4	5	5	5	2	4	2	3	1	3	2	5		EUC Nord Frederiksahvn	0	0	0	1	0				2	4
1	17	15	0	0	1	0	0	0		1	1	1	1	1	1	1	1	1	1	1	1	1	1	1	1	1	1	1	2	3	2	1	3	2	4		Gf 1 bh	0	0	0	1	0				2	4
			0	0	0	0	0	0																														0	1	0	0	0
1	18	15	0	0	1	0	0	0		2	3	3	3	2	2	3	3	3	3	4	3	3	3	3	3	1	1	1	2	2	3	3	3	1	5		Skive tekniske skole	0	0	0	1	0				2	5
2	16	25	0	0	0	0	0	1	Sundhedsfremme	2	3	6	2	5	4	3	6	2	3	2	3	2	2	2	2	2	6	2	4	3	1	3	2	1	2		Odense	0	0	0	1	0				2	3
1	17	40	0	1	0	0	0	1	til projekter	1	2	2	1	2	1	4	5	1	1	1	1	1	1	3	1	5	5	3	3	3	1	3	3	1	3		Aarhus Tech	0	0	0	1	0				3	4
2	17	45	1	1	0	0	0	0		4	5	5	4	4	4	3	4	4																				0	0	1	0	0				4	4
2	16	10	0	0	0	0	0	1	Når vi har haft sundhedsfremme	3	3	3	2	4	3	5	5	2	3	2	2	3	2	6	2	6	6	2	3	3	3	1	2	1	2		SOSU Fyn	0	0	0	1	0				1	3
1	16	30	1	0	0	0	1	0		3	2	3	2	3	1	4	2	2	2	1	1	1	2	2	2	6	6	2	3	3	1	1	1	1	5		Aarhus tech ??	0	0	0	1	0				3	3
2	18	60	0	0	1	0	0	0		2	6	6	3	6	3	5	6	3	6	6	3	3	3	6	6	6	6	4	4	3	3	2	1	1	2		SOSU Fyn	0	0	0	1	0				4	5
1	17	60	0	0	0	0	0	1	I fritiden	1	5	5	5	5	3	5	5	5	5	5	5	5	3	3	3	5	4	2	1	2	1	3	5	1	5		Sønderborg	0	0	0	1	0				4	4
2	17	10	0	1	0	0	0	0		2	2	2	1	4	5	5	5	2	3	2	2	4	3	3	3	2	2	2	3	3	1	2	2	1	2		SOSU Fyn	0	0	0	1	0				1	4
2	17	10	0	1	0	1	0	0		1	1	1	1	1	1	6	6	1	1	1	1	2	2	1	2	1	3	2	3	4	1	2	2	1	2		SOSU Fyn	0	0	0	1	0				1	4
2	17	15	0	0	1	0	0	0		2	6	2	3	5	5	4	6	6	6	3	3	5	2	3	3	1	1	4	3	2	1	2	3	1	2		Sosu Odense sv	0	0	0	1	0				2	4
2	17	20	0	0	0	0	1	0		3	6	2	1	6	4	4	4	2	4	3	2	4	2	2	2	6	3	2	4	2	2	3	3	5	2		Dalum	0	0	0	1	0				2	4
1	17	10	0	0	0	0	0	1	Sundhedsfremme	1	2	2	1	5	3	5	6	2	4	5	1	6	3	1	2	3	6	2	3	3	1	2	1	3	2		Odense	0	0	0	1	0				1	4
2	18	20	0	1	0	0	0	0		1	1	1	1	1	1	5	5	1	1	1	1	1	6	6	6	6	6	1	4	2	1	3	1	1	6	SSA	Sosu fyn	0	0	0	1	0				2	5
2	19	20	1	1	0	0	0	0		1	1	1	1	1	1	5	5	1	4	1	1	1	3	1	1	6	1	2	3	4	1	1	1	4	2		SOSU Fyn Syd	0	0	0	1	0				2	6
1	18	0	0	1	0	0	0	0		1	1	1	1	1	1	5	5	1	4	1	1	1	3	3	2	5	3	2	1	2	1	3	1	1	4		Aarhus tech	0	0	0	1	0				1	5
			0	0	0	0	0	0																														0	1	0	0	0
2	17	5	0	1	0	0	0	0		3	3	5	3	4	5	3	5	3	3	3	3	2	3	2	2	2	6	2	2	2	1	2	2	1	2		Sosu Fyn	0	0	0	1	0				1	4
2	16	10	0	1	0	1	0	0		3	3	4	4	4	4	2	1	3	2	3	3	2	3	2	3	4	2	2	3	3	3	1	4	1	2		SOSU Fyn	0	0	0	1	0				1	3
2	17	15	0	1	0	0	0	0		3	2	3	3	3	3	5	5	2	3	2	2	2	3	2	1	1	2	2	3	3	3	3	2	4	2		SOSU Fyn	0	0	0	1	0				2	4
2	19	20	0	1	0	0	0	0		2	2	3	2	2	2	4	4	2	3	3	2	3	2	2	2	3	6	3	4	5	3	1	2	5	2		Odense	0	0	0	1	0				2	6
2	17	15	0	1	0	0	0	0		4	3	3	2	5	4	5	5	3	3	2	1	1	3	2	4	2	6	1	2	3	1	2	3	1	2		Sosu fyn	0	0	0	1	0				2	4
2	16	10	1	0	0	1	0	0		1	1	1	1	3	1	5	5	4	1	1	1	3	3	2	3	3	2	2	3	3	1	3	3	2	2		Sosu odense	0	0	0	1	0				1	3
2	16	30	0	0	1	0	0	1	I praktisk fag	2	3	2	2	6	2	4	4	2	4	2	1	6	3	3	3	2	2	2	3	3	1	3	3	2	2		SOSU Randers	0	0	0	1	0				3	3
			0	0	0	0	0	0																														0	1	0	0	0
1	18	5	0	0	0	0	0	1	En gang imellem når de har sendt os på en gå tru	2	1	1	1	4	3	5	5	2	3	4	1	4	2	2	3	2	6	2	3	2	1	1	2	1	5		EUC syd	0	0	0	1	0				1	5
1	17	45	0	0	1	0	0	0		3	4	3	4	5	2	5	2	4	5	4	1	5	1	2	1	2	3	4	3	4	3	2	2	2	5		Skive Tekniske Skole	0	0	0	1	0				4	4
1	17	5	0	0	0	0	0	1	i et par timer en gang imellem	3	3	3	2	5	3	4	3	3	2	3	2	2	3	3	3	3	3	3	3	5	1	1	4	1	5		EUC syd Sønderborg	0	0	0	1	0				1	4
2	17	15	0	1	1	1	0	0		2	4	2	2	2	1	4	5	2	2	2	1	2	2	1	1	1	1	3	3	5	1	2	1	2	2		SOSU Horsens	0	0	0	1	0				2	4
2	17	25	0	1	0	0	0	0		2	2	2	3	3	3	2	4	2	2	3	3	3	3	3	3	3	3	3	3	3	1	3	3	1	2		Odense	0	0	0	1	0				2	4
1	18	30	0	0	1	0	0	0		2	4	2	2	4	1	5	5	2	2	3	2	2	3	3	3	3	2	2	3	3	1	3	3	1	2		sosu horsens	0	0	0	1	0				3	5
2	17	10	0	1	1	0	0	0		1	3	2	2	3	1	2	3	2	3	2	1	1	2	2	3	2	4	1	3	3	3	2	2	2	2		SOSU HORSENS	0	0	0	1	0				1	4
			0	0	0	0	0	0																														0	1	0	0	0
1	16	60	1	0	0	0	0	0		2	2	2	2	2	2	2	2	2	2	2	2	2	2	2	2	2	2	1	1	3	1	1	3	1	5		Euc Nordvestsjælland	0	0	0	1	0				4	3
1	18	20	1	1	1	0	0	0		2	2	2	1	2	2	5	5	1	2	2	2	2	2	2	2	2	2	2	2	2	1	1	1	1	5		Eucnvs	0	0	0	1	0				2	5
2	16	10	1	0	0	0	0	0		3	4	3	3	5	5	5	1	2	3	2	1	4	3	2	2	3	6	2	3	5	1	2	2	1	2		SOSU FYN	0	0	0	1	0				1	3
2	19	60	1	0	0	1	0	0		2	3	3	3	6	1	5	4	4																				0	0	1	0	0				4	6
			0	0	0	0	0	0																														0	1	0	0	0
1	17	40	1	0	1	1	1	0		1	2	3	2	3	1	4	5	1	2	2	2	1	2	1	1	4	3	2	1	2	2	2	2	1	5		holbæk, EUC nordvestsjælland	0	0	0	1	0				3	4
			0	0	0	0	0	0																														0	1	0	0	0
			0	0	0	0	0	0																														0	1	0	0	0
2	18	40	1	1	0	1	0	0		2	3	3	3	3	2	3	3	2	3	3	2	2	2	2	2	2	3	2	2	3	1	3	3	1	2		SOSU Esbjerg	0	0	0	1	0				3	5
1	17	35	1	0	1	0	0	0		1	1	1	1	6	6	6	6	1	1	3	1	1	2	1	1	1	5	2	2	2	2	2	2	1	5		euc nord	0	0	0	1	0				3	4
1	18	45	0	0	0	0	0	1	idrætsdag	2	5	5	5	3	3	4	4	4	5	4	4	5	3	2	2	6	6	3	4	5	3	6	2	2	5		Aarhus tech	0	0	0	1	0				4	5
2	17	45	0	1	0	0	0	0		2	2	2	2	2	2	4	4	2	2	2	2	2	2	2	2	2	2	3	1	1	1	2	2	5	2		Sosu syd	0	0	0	1	0				4	4
1	17	5	0	0	0	0	1	0		6	3	3	2	3	2	5	6	3	3	2	1	3	3	3	3	5	5	4	3	1	1	2	2	1	5		den her	0	0	0	1	0				1	4
1	52	45	0	0	1	0	0	0		3	3	3	3	5	4	3	3	2	4	3	4	3	4	4	5	5	2	3	3	4	2	1	2	1	5		Aarhus Tech	0	0	0	1	0				4
1	18	15	0	0	1	0	0	0		2	3	4	2	5	3	5	5	2	3	2	3	3	2	2	2	6	6	2	3	2	3	3	2	1	5		Mercantec	0	0	0	1	0				2	5
1	16	20	0	0	1	0	0	0		4	4	4	4	4	4	4	4	4	4	4	4	4																0	0	1	0	0				2	3
1	17	15	0	1	0	1	0	0		6	4	4	3	4	3	2	2	3	6	6	6	3	3	2	2	6	6	1	4	4	2	2	6	1	5		Mercantec viborg	0	0	0	1	0				2	4
1	18	5	1	0	1	0	0	0		3	3	3	1	5	4	5	4	2	5	2	4	2	3	6	6	6	5	2	3	3	1	2	3	1	5		Eucnvs	0	0	0	1	0				1	5
2	17	15	0	0	1	0	0	0		3	2	3	3	5	2	3	3	2	3	3	2	4	2	2	2	3	1	3	1	2	1	2	1	1	2		Sosu Odense	0	0	0	1	0				2	4
			0	0	0	0	0	0																														0	1	0	0	0
			0	0	0	0	0	0																														0	1	0	0	0
1	16	10	0	0	0	0	0	0																														0	0	1	0	0				1	3
1	17	45	0	1	0	0	0	0		2	5	1	1	5	3	5	5	2	2	4	4	5	3	2	3	3	4	2	2	3	2	1	2	2	5		EUC nord Hjørring	0	0	0	1	0				4	4
1	18	30	0	1	0	0	0	0		6	5	3	3	5	6	5	5	4	3	3	5	1	5	3	2	5	5	1	4	4	3	2	2	1	5		Aarhus tech	0	0	0	1	0				3	5
1	17	0	0	0	0	0	0	1	idræts dag	6	6	6	6	6	6	6	6	6																				0	0	1	0	0				1	4
1	19	20	1	0	0	0	1	0		2	1	3	2	4	2	5	4	2	3	3	3	3	4	2	3	2	3	2	3	2	3	3	3	1	5		EUC nord Frederikshavn	0	0	0	1	0				2	6
2	16	30	0	0	1	0	0	0		3	3	6	1	5	4	5	6	1	2	1	3	6	3	3	3	6	6	2	1	2	1	3	4	1	4		Aalborg Tech	0	0	0	1	0				3	3
1	17	45	0	0	1	0	0	0		1	2	3	1	3	1	6	5	1	1	1	1	1	1	1	1	1	1	2	3	2	1	2	2	2	5		Teknisk	0	0	0	1	0				4	4
			0	0	0	0	0	0																														0	1	0	0	0
2	17	20	0	0	1	0	0	0		1	1	1	1	1	1	5	5	1	1	1	1	1	1	3	1	4	5	2	1	2	1	2	2	1	2		SOSU Kolding	0	0	0	1	0				2	4
1	17	20	0	0	0	1	0	0		2	2	2	2	2	2	2	2	2	2	2	2	2	3	3	3	3	3	2	3	2	2	2	2	2	5		celf	0	0	0	1	0				2	4
			0	0	0	0	0	0																														0	1	0	0	0
2	17	15	0	0	0	1	1	0		2	1	1	1	1	1	5	2	1	3	4	1	1	4	4	3	5	5	3	3	2	1	3	3	3				0	0	1	0	0				2	4
2	17	20	0	1	0	0	0	0		3	4	5	4	5	5	3	5	4	3	5	5	4	4	2	3	6	6	1	2	2	2	1	2	1	2		SOSU Fyn Syd	0	0	0	1	0				2	4
2	17	35	0	0	1	0	1	0		1	1	1	2	1	1	5	5	1	3	3	3	2	1	1	1	1	1	2	2	3	1	2						0	0	1	0	0				3	4
1	18	50	0	1	1	0	1	0		2	2	2	1	2	1	5	5	1	2	2	2	3	3	3	2	2	6	2	3	2	1	2	2	4	2		Sosu Aarhus	0	0	0	1	0				4	5
1	17	25	0	0	1	0	0	0		3	4	3	1	4	2	1	1	5	2	5	3	5	5	5	5	5	5	2	4	4	1	2	5	1	5		EUC Frederikshavn	0	0	0	1	0				2	4
1	16	30	0	0	1	0	0	0		2	3	5	2	5	3	5	5	2	3	3	4	5	2	2	2	6	6	1	2	3	2	2	1	1	5		Mercantec Viborg	0	0	0	1	0				3	3
			0	0	0	0	0	0																														0	1	0	0	0
			0	0	0	0	0	0																														0	1	0	0	0
1	17	60	1	0	0	0	0	0																														0	0	1	0	0				4	4
1	16	30	1	0	0	0	0	0		2	3	2	6	5	5	5	4	3	2	3	4	6	2	3	6	5	6	2	4									0	0	1	0	0				3	3
1	18	15	0	1	1	0	0	1	Vi har været meget i stalden og har haft	1	1	6	1	2	3	4	1	3	1	3	3	1	1	1	1	6	1	3	3	3	2	2	1	1	4		Agri collage aalborg	0	0	0	1	0				2	5
2	17	20	0	1	0	0	0	0		2	1	3	1	3	6	5	6	1	2	1	2	2	1	1	1	1	1	2	4	5	3	6	1	4	2		sosu	0	0	0	1	0				2	4
2	16	25	1	1	1	0	0	0		2	1	2	2	2	2	6	6	2	1	1	1	1	2	1	1	1	2	2	2	2	1	3	3	2	2		Sosu Fyn	0	0	0	1	0				2	3
1	18	15	1	0	0	0	0	0		4	5	4	2	4	3	2	3	3	3	3	5	4	6	5	4	4	3	4	4	3	2	6	6	1	5		Aarhus tech	0	0	0	1	0				2	5
2	17	45	0	0	1	1	0	0		6	6	6	6	6	6	6	6	6	6	6	6	6	6	6	6	6	6	4	1	1	1	6	5	4	2		Odense	0	0	0	1	0				4	4
1	16	20	0	0	1	0	0	0		1	3	3	2	5	4	5	4	2	2	2	1	3	2	3	4	5	5	2	2	1	2	1	1	1	4		Aalborg foodprocessor college	0	0	0	1	0				2	3
1	16	30	1	0	0	0	0	0																														0	0	1	0	0				3	3
1	19	20	0	0	1	0	0	0		1	3	5	3	1	1	6	5	1	3	1	1	1	1	4	1	6	6	3	2	2	1	1	3	1	5		Aarhus tech	0	0	0	1	0				2	6
			0	0	0	0	0	0																														0	1	0	0	0
			0	0	0	0	0	0																														0	1	0	0	0
1	16	10	0	0	1	1	0	0		6	3	3	2	5	4	5	4	2																				0	0	1	0	0				1	3
			0	0	0	0	0	0																														0	1	0	0	0
			0	0	0	0	0	0																														0	1	0	0	0
			0	0	0	0	0	0																														0	1	0	0	0
			0	0	0	0	0	0																														0	1	0	0	0
1	16	15	0	0	0	1	0	0		1	1	1	1	1	1	1	1	1	2	2	2	2	5	5	5	5	5	1	4	2	1	3	3	5				0	0	1	0	0				2	3
			0	0	0	0	0	0																														0	1	0	0	0
1	18	20	0	0	1	1	1	0		2	2	1	1	2	4	5	3	1	6	3	1	3	4	3	3	2	3	2	2	2	1	3	2	1	2		Sosu Odense	0	0	0	1	0				2	5
2	17	60	0	0	1	0	0	0		2	2	3	3	3	2	6	3	2	2	2	1	3	1	1	2	2	1	2	4	3	1	3	2	1	2		Sosu fyn	0	0	0	1	0				4	4
2	18	15	1	1	0	0	0	0		2	3	4	2	5	3	4	5	1	4	4	3	2	3	3	4	5	3	3	4	4	1	3	3	2	2		SOSU Fyn syd	0	0	0	1	0				2	5
1	18	60	0	0	1	0	0	0		2	5	3	3	5	3	5	4	3	3	3	3	3	3	3	3	3	2	2	4	5	2	3	2	5	4		Aalborg tech	0	0	0	1	0				4	5
2	18	20	0	0	1	0	0	0		4	3	4	3	3	3	3	4	4	2	3	3	2	2	3	3	1	1	1	4	2	3	2	2	1	2		Odense	0	0	0	1	0				2	5

## Sheet: Complete
Hvilket køn er du?	Hvor gammel er du?	Hvor mange minutters motion og bevægelse vurderer du, at der har været i gennemsnit om dagen på dit grundforløb 1?	Hvornår har du oplevet bevægelse og motion på grundforløb 1? - Til sociale arrangementer	Hvornår har du oplevet bevægelse og motion på grundforløb 1? - I den boglige undervisning	Hvornår har du oplevet bevægelse og motion på grundforløb 1? - Vi har haft motion/idræt på skemaet	Hvornår har du oplevet bevægelse og motion på grundforløb 1? - I pauserne	Hvornår har du oplevet bevægelse og motion på grundforløb 1? - Inden eller efter skoletid	Hvornår har du oplevet bevægelse og motion på grundforløb 1? - Andet	Hvornår har du oplevet bevægelse og motion på grundforløb 1? - Andet	Hvad synes du om motion og bevægelse i skolen? - Det er godt for det sociale i klassen	Hvad synes du om motion og bevægelse i skolen? - Det hjælper til, at jeg bedre kan koncentrere mig	Hvad synes du om motion og bevægelse i skolen? - Det gør, at det er sjovere at gå i skole	Hvad synes du om motion og bevægelse i skolen? - Det er et dejligt afbræk i den boglige undervisng	Hvad synes du om motion og bevægelse i skolen? - Det gør, at jeg har lært mere om min sundhed	Hvad synes du om motion og bevægelse i skolen? - Det gør mig sundere	Hvad synes du om motion og bevægelse i skolen? - Det er forstyrende for min undervisning	Hvad synes du om motion og bevægelse i skolen? - Det giver ikke mening at bruge tid på i løbet af skoledagen	Hvad synes du om motion og bevægelse i skolen? - Det er en god idé	Har følgende betydning for, om du deltager i motion og bevægelse på grundforløb 1? - at min lærer sætter aktiviteten igang	Har følgende betydning for, om du deltager i motion og bevægelse på grundforløb 1? - at mine klassekammerater også bevæger sig	Har følgende betydning for, om du deltager i motion og bevægelse på grundforløb 1? - at det er sjove aktiviteter vi laver	Har følgende betydning for, om du deltager i motion og bevægelse på grundforløb 1? - at jeg forstår, hvorfor vi skal bevæge os	Hvad synes du, om jeres faciliteter til bevægelse på skolen? - Skolens undervisningslokaler	Hvad synes du, om jeres faciliteter til bevægelse på skolen? - Uderum (græsplæne, skov mv.)	Hvad synes du, om jeres faciliteter til bevægelse på skolen? - Fællesarealer (gang, aula, trapper mv.)	Hvad synes du, om jeres faciliteter til bevægelse på skolen? - Idrætshal	Hvad synes du, om jeres faciliteter til bevægelse på skolen? - Adgang til bad	Kan du finde på at vælge motion og bevægelse fra på grundforløb 1 fordi, at du ikke vil svede?	Hvad passer bedst som beskrivelse af din bevægelse og motion i fritiden?	Hvordan vurderer du din fysiske form?	Vil du gerne lave mere bevægelse og motion?	Hvor godt vurderer du, at du generelt klarer dig i skolen?	I hvor høj grad er du glad for at gå på grundforløb 1?	Ryger du?	Ved du hvilket hovedområde du går på?	Ved du hvilket hovedområde du går på? - Nej - jeg ved ikke hvilket hovedområde, jeg er tilknyttet (skriv gerne hvad din uddannelse hedder)	Hvilken skole går du på? (fx Aalborg Tech, SOSU Aarhus...)	Samlet status - Ny	Samlet status - Distribueret	Samlet status - Nogen svar	Samlet status - Gennemført	Samlet status - Frafaldet				antal minutters motion	Kategori - Alder
Kvinde	17	15	0	0	1	0	0	1	Nogle gange i timerne	Ved ikke	Slet ikke	Slet ikke	I nogen grad	Slet ikke	Ved ikke	I nogen grad	I meget høj grad	Slet ikke	I mindre grad	Ved ikke	Ved ikke	I mindre grad	Middel	Ved ikke	Meget dårlige	Ved ikke	Ved ikke	Ved ikke	Spadserer, cykler eller har anden lettere motion mindst 4 timer om ugen (medregn også cykling/gang til skole)	Nogenlunde	Ved ikke	Jeg klarer mig middelt	I mindre grad	Nej	Ja - Omsorg, sundhed og pædagogik		Aalborg tech	0	0	0	1	0				15-25 minutter	17
Mand	17	20	0	0	1	1	1	0		I høj grad	I høj grad	I nogen grad	I høj grad	Slet ikke	I høj grad	Slet ikke	I høj grad	I meget høj grad	Slet ikke	I høj grad	I nogen grad	I nogen grad	Meget gode	Dårlige	Meget gode	Gode	Gode	Nej	Dyrker motionsidræt, løber eller lignende mindst 4 timer om ugen	God	Nej	Jeg klarer mig godt	I høj grad	Nej	Ja - Teknologi, byggeri og transport.		Skive Tekniske Skole	0	0	0	1	0				15-25 minutter	17
			0	0	0	0	0	0																														0	1	0	0	0
Mand	17	20	0	0	1	1	0	0		I meget høj grad	I meget høj grad	I nogen grad	I høj grad	I høj grad	I nogen grad	I nogen grad	I høj grad	I meget høj grad	I høj grad	I høj grad	I høj grad	I høj grad	Gode	Middel	Gode	Gode	Meget gode	Ja	Dyrker motionsidræt, løber eller lignende mindst 4 timer om ugen	God	Ja	Jeg klarer mig middelt	I nogen grad	Nej	Ja - Omsorg, sundhed og pædagogik		sosu vejle	0	0	0	1	0				15-25 minutter	17
Kvinde	17	15	0	1	0	0	0	0		I nogen grad	I høj grad	I mindre grad	I høj grad	Slet ikke	I høj grad	I nogen grad	I mindre grad	I nogen grad	I mindre grad	I høj grad	I nogen grad	I høj grad	Gode	Gode	Middel	Meget dårlige	Meget dårlige	Ja	Dyrker motionsidræt, løber eller lignende mindst 4 timer om ugen	God	Nej	Jeg klarer mig meget godt	I høj grad	Nej	Ja - Omsorg, sundhed og pædagogik		Aalborg tech	0	0	0	1	0				15-25 minutter	17
Mand	17	35	0	1	0	1	1	0		I høj grad	I meget høj grad	I meget høj grad	I meget høj grad	Slet ikke	I nogen grad	Slet ikke	Slet ikke	I meget høj grad	I meget høj grad	I meget høj grad	I meget høj grad	I meget høj grad	Ved ikke	Meget gode	Meget gode	Meget gode	Ved ikke	Nej	Spadserer, cykler eller har anden lettere motion mindst 4 timer om ugen (medregn også cykling/gang til skole)	Mindre god	Ja	Jeg klarer mig middelt	I meget høj grad	Nej	Ja - Teknologi, byggeri og transport.		euc nord	0	0	0	1	0				30-40 minutter	17
Kvinde	17	40	0	1	0	1	1	0		I nogen grad	I nogen grad	I nogen grad	I nogen grad	I nogen grad	I nogen grad	I nogen grad	I nogen grad	I nogen grad	I nogen grad	I nogen grad	I nogen grad	I nogen grad	Gode	Gode	Gode	Gode	Gode	Nej	Dyrker motionsidræt, løber eller lignende mindst 4 timer om ugen	God	Ja	Jeg klarer mig godt	I høj grad	Ja, mere en 11 cigaretter om dagen	Ja - Omsorg, sundhed og pædagogik		EUC Nord	0	0	0	1	0				30-40 minutter	17
Mand	16	30	0	0	1	0	0	0		I meget høj grad	I meget høj grad	I meget høj grad	I meget høj grad	Ved ikke	I meget høj grad	Slet ikke	I mindre grad	I meget høj grad	I mindre grad	I meget høj grad	I meget høj grad	I meget høj grad	Meget gode	Gode	Meget gode	Ved ikke	Meget gode	Ved ikke	Læser, ser fjernsyn eller har anden stillesiddende beskæftigelse	Mindre god	Ja	Jeg klarer mig godt	I meget høj grad	Nej	Ja - Teknologi, byggeri og transport.		Skive teknisk skole	0	0	0	1	0				30-40 minutter	16
			0	0	0	0	0	0																														0	1	0	0	0
Kvinde	16	10	0	1	1	0	0	0		I nogen grad	I mindre grad	Slet ikke	I høj grad	I mindre grad	I nogen grad	I høj grad	Slet ikke	I nogen grad	I meget høj grad	I meget høj grad	I nogen grad	I høj grad	Middel	Dårlige	Dårlige	Meget dårlige	Meget dårlige	Nej	Læser, ser fjernsyn eller har anden stillesiddende beskæftigelse	Dårlig	Nej	Jeg klarer mig meget godt	I nogen grad	Ja en gang imellem til fester	Ja - Omsorg, sundhed og pædagogik		Aalborg tech	0	0	0	1	0				0-10 minutter	16
			0	0	0	0	0	0																														0	1	0	0	0
Mand	16	45	0	1	0	1	0	0		I nogen grad	I nogen grad	I nogen grad	I nogen grad	I nogen grad	I nogen grad	I nogen grad	I nogen grad	I nogen grad	I nogen grad	I nogen grad	I nogen grad	I nogen grad	Gode	Gode	Gode	Gode	Gode	Ja	Dyrker motionsidræt, løber eller lignende mindst 4 timer om ugen	God	Ja	Jeg klarer mig meget godt	I høj grad	Ja, mere en 11 cigaretter om dagen	Ja - Omsorg, sundhed og pædagogik		Eucnord	0	0	0	1	0				45 - over 60 min	16
Mand	17	15	0	0	1	0	0	0		Slet ikke	Slet ikke	Slet ikke	I mindre grad	Slet ikke	Slet ikke	I høj grad	Slet ikke	I mindre grad	Slet ikke	Slet ikke	Slet ikke	Slet ikke	Gode	Dårlige	Dårlige	Dårlige	Dårlige	Nej	Dyrker motionsidræt, løber eller lignende mindst 4 timer om ugen	God	Nej	Jeg klarer mig meget godt	I nogen grad	Nej	Ja - Omsorg, sundhed og pædagogik		Aalborg tech	0	0	0	1	0				15-25 minutter	17
Mand	18	35	0	0	1	0	0	0		I mindre grad	I nogen grad	I høj grad	I høj grad	Slet ikke	I mindre grad	Slet ikke	Slet ikke	I meget høj grad	I meget høj grad	I mindre grad	I høj grad	I mindre grad	Gode	Middel	Gode	Dårlige	Middel	Nej	Spadserer, cykler eller har anden lettere motion mindst 4 timer om ugen (medregn også cykling/gang til skole)	Nogenlunde	Ja	Jeg klarer mig godt	I nogen grad	Nej	Ja - Teknologi, byggeri og transport.		Skive teknisk skole	0	0	0	1	0				30-40 minutter	18
Mand	18	15	0	0	0	0	1	0		I nogen grad	I meget høj grad	I høj grad	I høj grad	I nogen grad	I høj grad	I nogen grad	I mindre grad	I høj grad	I høj grad	I nogen grad	I nogen grad	I høj grad	Middel	Middel	Ved ikke	Dårlige	Meget dårlige	Nej	Træner hårdt og dyrker konkurrenceidræt regelmæssigt og flere gange om ugen	Virkelig god	Nej	Jeg klarer mig middelt	I mindre grad	Nej	Ja - Teknologi, byggeri og transport.		EUC HOLBÆK	0	0	0	1	0				15-25 minutter	18
Mand	17	5	1	0	0	0	0	0		Slet ikke	I mindre grad	Slet ikke	I nogen grad	I mindre grad	Slet ikke	Slet ikke	I nogen grad	I nogen grad	I høj grad	I høj grad	I meget høj grad	I høj grad	Gode	Middel	Middel	Ved ikke	Middel	Nej	Træner hårdt og dyrker konkurrenceidræt regelmæssigt og flere gange om ugen	God	Nej	Jeg klarer mig middelt	I nogen grad	Nej	Ja - Teknologi, byggeri og transport.		EUC nordvestsjælland	0	0	0	1	0				0-10 minutter	17
Kvinde	18	20	1	1	0	0	0	0		I meget høj grad	I meget høj grad	I nogen grad	I meget høj grad	I nogen grad	I høj grad	Slet ikke	I mindre grad	I meget høj grad	I høj grad	I meget høj grad	I høj grad	I høj grad	Meget gode	Meget gode	Meget gode	Middel	Meget gode	Ja	Spadserer, cykler eller har anden lettere motion mindst 4 timer om ugen (medregn også cykling/gang til skole)									0	0	1	0	0				15-25 minutter	18
Kvinde	17	10	0	0	1	0	0	0		I mindre grad	I mindre grad	I mindre grad	I mindre grad	I mindre grad	I mindre grad	I nogen grad	I mindre grad	I mindre grad	I mindre grad	I høj grad	I høj grad	I høj grad	Meget dårlige	Dårlige	Meget dårlige	Meget dårlige	Dårlige	Ja	Spadserer, cykler eller har anden lettere motion mindst 4 timer om ugen (medregn også cykling/gang til skole)	Mindre god	Ja	Jeg klarer mig godt	I mindre grad	ja, 1-5 cigaretter om dagen	Ja - Omsorg, sundhed og pædagogik		Aalborg tech College	0	0	0	1	0				0-10 minutter	17
Kvinde	17	20	0	0	1	1	0	0		Slet ikke	I mindre grad	Slet ikke	I nogen grad	I mindre grad	I nogen grad	Slet ikke	I nogen grad	I nogen grad	I mindre grad	I høj grad	I meget høj grad	I nogen grad	Gode	Meget dårlige	Gode	Gode	Middel	Ja	Spadserer, cykler eller har anden lettere motion mindst 4 timer om ugen (medregn også cykling/gang til skole)	Nogenlunde	Nej	Jeg klarer mig meget godt	I nogen grad	Nej	Ja - Omsorg, sundhed og pædagogik		SOSU - Vejle	0	0	0	1	0				15-25 minutter	17
Kvinde	17	20	0	0	1	1	0	0		Slet ikke	I mindre grad	I mindre grad	I nogen grad	I mindre grad	I nogen grad	Slet ikke	I nogen grad	I nogen grad	I mindre grad	I høj grad	I meget høj grad	I nogen grad	Gode	Meget dårlige	Gode	Gode	Middel	Ja	Spadserer, cykler eller har anden lettere motion mindst 4 timer om ugen (medregn også cykling/gang til skole)									0	0	1	0	0				15-25 minutter	17
Kvinde	17	10	0	1	0	0	0	1	idrætsdage	I høj grad	I høj grad	I nogen grad	I høj grad	I mindre grad	I mindre grad	I mindre grad	I nogen grad	I nogen grad	I høj grad	I meget høj grad	I meget høj grad	I høj grad	Gode	Middel	Gode	Ved ikke	Ved ikke	Måske	Spadserer, cykler eller har anden lettere motion mindst 4 timer om ugen (medregn også cykling/gang til skole)	Nogenlunde	Ja	Jeg klarer mig godt	I høj grad	Nej	Nej - jeg ved ikke hvilket hovedområde, jeg er tilknyttet (skriv gerne hvad din uddannelse hedder)	mediegrafiker	Aarhus Tech dollerupvej	0	0	0	1	0				0-10 minutter	17
Kvinde	17	30	0	0	1	1	1	0		I nogen grad	Ved ikke	I høj grad	I høj grad	Ved ikke	Ved ikke	Slet ikke	I mindre grad	I høj grad	I meget høj grad	I meget høj grad	I meget høj grad	I meget høj grad	Gode	Middel	Gode	Gode	Ved ikke	Nej	Spadserer, cykler eller har anden lettere motion mindst 4 timer om ugen (medregn også cykling/gang til skole)	Nogenlunde	Ja	Jeg klarer mig godt	I høj grad	Ja en gang imellem til fester	Ja - Omsorg, sundhed og pædagogik		SOSU Vejle	0	0	0	1	0				30-40 minutter	17
Mand	17	over 60	0	0	1	0	0	0		I nogen grad	I nogen grad	I nogen grad	I høj grad	I nogen grad	I meget høj grad	I mindre grad	I mindre grad	I meget høj grad	I nogen grad	I nogen grad	I nogen grad	I nogen grad	Gode	Meget gode	Gode	Gode	Meget gode	Nej	Spadserer, cykler eller har anden lettere motion mindst 4 timer om ugen (medregn også cykling/gang til skole)	Nogenlunde	Ja	Jeg klarer mig meget godt	I høj grad	Nej	Ja - Teknologi, byggeri og transport.		Skive teknisk skole	0	0	0	1	0				45 - over 60 min	17
Kvinde	18	10	0	0	1	0	0	0		I høj grad	I nogen grad	Ved ikke	Ved ikke	Slet ikke	Ved ikke	I mindre grad	Ved ikke	I meget høj grad	Ved ikke	Ved ikke	Ved ikke	Ved ikke	Ved ikke	Ved ikke	Ved ikke	Ved ikke	Ved ikke	Måske	Dyrker motionsidræt, løber eller lignende mindst 4 timer om ugen	God	Ja	Jeg klarer mig godt	Ved ikke	ja, 1-5 cigaretter om dagen	Ja - Omsorg, sundhed og pædagogik		Aalborg tech	0	0	0	1	0				0-10 minutter	18
			0	0	0	0	0	0																														0	1	0	0	0
Mand	17	15	0	0	1	1	1	0		I høj grad	I meget høj grad	I nogen grad	I høj grad	I nogen grad	I høj grad	I nogen grad	Slet ikke	I meget høj grad	I høj grad	I mindre grad	I mindre grad	I høj grad	Dårlige	Gode	Meget dårlige	Gode	Meget dårlige	Nej	Spadserer, cykler eller har anden lettere motion mindst 4 timer om ugen (medregn også cykling/gang til skole)	Mindre god	Ved ikke	Jeg klarer mig middelt	I nogen grad	Nej	Ja - Teknologi, byggeri og transport.		Skive Tekniske Skole	0	0	0	1	0				15-25 minutter	17
Mand	19	35	1	1	1	0	0	0		I mindre grad	I nogen grad	Ved ikke	Ved ikke	I nogen grad	I nogen grad	I mindre grad	I meget høj grad	Ved ikke	I høj grad	I nogen grad	I nogen grad	I nogen grad	Gode	Middel	Middel	Middel	Meget gode	Ved ikke	Læser, ser fjernsyn eller har anden stillesiddende beskæftigelse	Nogenlunde	Ved ikke	Jeg klarer mig middelt	I høj grad	Ja, mere en 11 cigaretter om dagen	Ja - Fødevarer, jordbrug og oplevelser		Aalborg Tech	0	0	0	1	0				30-40 minutter	19
Kvinde	17	15	0	0	1	0	0	0		I nogen grad	Slet ikke	I mindre grad	I mindre grad	I nogen grad	I meget høj grad	I mindre grad	I meget høj grad	I nogen grad	I mindre grad	I nogen grad	I meget høj grad	I mindre grad	Middel	Middel	Middel	Middel	Middel	Måske	Spadserer, cykler eller har anden lettere motion mindst 4 timer om ugen (medregn også cykling/gang til skole)	Nogenlunde	Ja	Jeg klarer mig meget godt	I meget høj grad	Nej	Ja - Omsorg, sundhed og pædagogik		SOSU Vejle	0	0	0	1	0				15-25 minutter	17
Mand	18	5	0	0	0	0	0	1	Idrætsdag	Ved ikke	Ved ikke	Ved ikke	I meget høj grad	Ved ikke	Ved ikke	Ved ikke	Ved ikke	I nogen grad	I høj grad	I høj grad	I høj grad	I høj grad	Ved ikke	Ved ikke	Ved ikke	Ved ikke	Ved ikke	Ved ikke										0	0	1	0	0				0-10 minutter	18
Mand	18	30	0	0	1	1	0	0		I høj grad	I høj grad	I høj grad	I høj grad	I nogen grad	I høj grad	Slet ikke	I nogen grad	I høj grad	I høj grad	I høj grad	I høj grad	I høj grad	Gode	Gode	Gode	Ved ikke	Ved ikke	Nej	Træner hårdt og dyrker konkurrenceidræt regelmæssigt og flere gange om ugen	God	Ja	Jeg klarer mig middelt	I meget høj grad	Ja en gang imellem til fester	Ja - Teknologi, byggeri og transport.		Skive teknisk skole	0	0	0	1	0				30-40 minutter	18
Mand	17	over 60	1	0	1	0	0	1	Idrætsdage	I meget høj grad	I meget høj grad	I meget høj grad	I meget høj grad	I meget høj grad	I meget høj grad	I mindre grad	Slet ikke	I høj grad	I nogen grad	I nogen grad	I nogen grad	Slet ikke	Ved ikke	Ved ikke	Ved ikke	Ved ikke	Ved ikke	Nej	Træner hårdt og dyrker konkurrenceidræt regelmæssigt og flere gange om ugen	Virkelig god	Ved ikke	Jeg klarer mig middelt	I nogen grad	Ja en gang imellem til fester	Ja - Teknologi, byggeri og transport.		Aarhus tech	0	0	0	1	0				45 - over 60 min	17
Mand	17	20	0	0	1	0	0	0		I nogen grad	I nogen grad	I mindre grad	I høj grad	Slet ikke	I mindre grad	Slet ikke	I mindre grad	I høj grad	I nogen grad	Slet ikke	I høj grad	I høj grad	Meget gode	Dårlige	Gode	Ved ikke	Middel	Nej	Træner hårdt og dyrker konkurrenceidræt regelmæssigt og flere gange om ugen	God	Nej	Jeg klarer mig middelt	I høj grad	Nej	Ja - Teknologi, byggeri og transport.		Skive	0	0	0	1	0				15-25 minutter	17
Kvinde	18	15	0	0	1	0	0	0		I nogen grad	I høj grad	I nogen grad	I høj grad	I nogen grad	I høj grad	Slet ikke	I nogen grad	I nogen grad	I nogen grad	I nogen grad	I nogen grad	I mindre grad	Gode	Middel	Gode	Gode	Middel	Nej	Spadserer, cykler eller har anden lettere motion mindst 4 timer om ugen (medregn også cykling/gang til skole)	Nogenlunde	Ja	Jeg klarer mig godt	I meget høj grad	Nej	Ja - Omsorg, sundhed og pædagogik		SOSU Vejle	0	0	0	1	0				15-25 minutter	18
Mand	16	over 60	0	1	1	0	0	0		I nogen grad	Ved ikke	I nogen grad	I høj grad	Slet ikke	I nogen grad	I mindre grad	Ved ikke	I nogen grad	Ved ikke	Ved ikke	I nogen grad	Ved ikke	Middel	Dårlige	Dårlige	Gode	Middel	Nej	Spadserer, cykler eller har anden lettere motion mindst 4 timer om ugen (medregn også cykling/gang til skole)	Nogenlunde	Ved ikke	Jeg klarer mig middelt	I høj grad	Nej	Ja - Teknologi, byggeri og transport.		Skive tekniske skole	0	0	0	1	0				45 - over 60 min	16
Mand	17	5	0	1	0	0	0	0		Slet ikke	Slet ikke	Slet ikke	I meget høj grad	Slet ikke	Slet ikke	Slet ikke	Slet ikke	I meget høj grad	Slet ikke	Slet ikke	I meget høj grad	I meget høj grad	Dårlige	Dårlige	Middel	Ved ikke	Meget dårlige	Nej	Spadserer, cykler eller har anden lettere motion mindst 4 timer om ugen (medregn også cykling/gang til skole)	God	Nej	Jeg klarer mig meget godt	I meget høj grad	Nej	Ja - Teknologi, byggeri og transport.		EUC Nord Frederikshavn	0	0	0	1	0				0-10 minutter	17
Kvinde	57	over 60	1	1	1	1	1	0		I nogen grad	Slet ikke	I mindre grad	I mindre grad	I meget høj grad	I mindre grad																							0	0	1	0	0				45 - over 60 min
Kvinde	17	15	0	0	1	0	0	0		I høj grad	Ved ikke	I mindre grad	I meget høj grad	I høj grad	I nogen grad	Ved ikke	I nogen grad	I høj grad	I høj grad	I mindre grad	I mindre grad	I høj grad	Gode	Gode	Gode	Gode	Gode	Nej	Spadserer, cykler eller har anden lettere motion mindst 4 timer om ugen (medregn også cykling/gang til skole)	Mindre god	Ja	Jeg klarer mig ikke så godt	I høj grad	Nej	Ja - Omsorg, sundhed og pædagogik		SOSU Vejle	0	0	0	1	0				15-25 minutter	17
Mand	17	5	0	0	0	1	0	0		I høj grad	Ved ikke	Slet ikke	Ved ikke	I mindre grad	I nogen grad	Ved ikke	Ved ikke	I nogen grad	Ved ikke	Ved ikke	I nogen grad	I nogen grad	Ved ikke	Gode	Gode	Gode	Gode	Nej	Læser, ser fjernsyn eller har anden stillesiddende beskæftigelse	Nogenlunde	Ja	Jeg klarer mig godt	I nogen grad	Nej	Nej - jeg ved ikke hvilket hovedområde, jeg er tilknyttet (skriv gerne hvad din uddannelse hedder)	indrustriteknikker	AARHUS TECH	0	0	0	1	0				0-10 minutter	17
Mand	16	15	0	0	1	1	0	0		I nogen grad	I nogen grad	I nogen grad	I meget høj grad	Slet ikke	I nogen grad	I mindre grad	I mindre grad	I høj grad	I nogen grad	I nogen grad	Slet ikke	Slet ikke	Middel	Gode	Middel	Ved ikke	Ved ikke	Nej	Læser, ser fjernsyn eller har anden stillesiddende beskæftigelse	Mindre god	Nej	Jeg klarer mig godt	I meget høj grad	Nej	Ja - Teknologi, byggeri og transport.		Skive Tekniske Skole	0	0	0	1	0				15-25 minutter	16
Mand	17	50	1	0	1	1	0	0		I høj grad	I nogen grad	I høj grad	I høj grad	I høj grad	I høj grad	Slet ikke	Slet ikke	I høj grad	I høj grad	I høj grad	I høj grad	I høj grad	Gode	Gode	Gode	Gode	Middel	Nej	Spadserer, cykler eller har anden lettere motion mindst 4 timer om ugen (medregn også cykling/gang til skole)	Nogenlunde	Ved ikke	Jeg klarer mig godt	I høj grad	Ja en gang imellem til fester	Ja - Omsorg, sundhed og pædagogik		SOSU Horsens	0	0	0	1	0				45 - over 60 min	17
Mand	18	40	0	0	1	0	0	0		I høj grad	I høj grad	I meget høj grad	I meget høj grad	I nogen grad	I høj grad	Slet ikke	Slet ikke	I høj grad	I høj grad	I nogen grad	I meget høj grad	I høj grad	Meget gode	Middel	Gode	Meget gode	Middel	Nej	Dyrker motionsidræt, løber eller lignende mindst 4 timer om ugen	God	Ja	Jeg klarer mig godt	I høj grad	Nej	Ja - Omsorg, sundhed og pædagogik		Sosu vejle	0	0	0	1	0				30-40 minutter	18
Kvinde	18	20	0	0	1	0	0	0		I mindre grad	I meget høj grad	Slet ikke	I meget høj grad	Slet ikke	I mindre grad	Slet ikke	Slet ikke	I meget høj grad	I høj grad	I meget høj grad	I meget høj grad	I mindre grad	Gode	Ved ikke	Ved ikke	Ved ikke	Ved ikke	Ja	Spadserer, cykler eller har anden lettere motion mindst 4 timer om ugen (medregn også cykling/gang til skole)	Dårlig	Ved ikke	Jeg klarer mig godt	I meget høj grad	ja, 6-10 cigaretter om dagen	Ja - Omsorg, sundhed og pædagogik		Revy college	0	0	0	1	0				15-25 minutter	18
Kvinde	17	15	1	1	1	1	0	0		I høj grad	I høj grad	I nogen grad	I meget høj grad	I høj grad	I meget høj grad	I mindre grad	Slet ikke	I høj grad	I høj grad	I meget høj grad	I meget høj grad	I høj grad	Gode	Ved ikke	Middel	Ved ikke	Ved ikke	Måske	Spadserer, cykler eller har anden lettere motion mindst 4 timer om ugen (medregn også cykling/gang til skole)	Mindre god	Ja	Jeg klarer mig godt	I meget høj grad	Nej	Ja - Omsorg, sundhed og pædagogik		Aarhus Tech	0	0	0	1	0				15-25 minutter	17
Mand	18	15	0	1	1	0	0	0		I høj grad	I meget høj grad	I meget høj grad	I høj grad	Slet ikke	Slet ikke	Slet ikke	I høj grad	I meget høj grad	I nogen grad	I høj grad	I høj grad	I høj grad	Meget gode	Meget gode	Gode	Meget dårlige	Middel	Måske	Spadserer, cykler eller har anden lettere motion mindst 4 timer om ugen (medregn også cykling/gang til skole)	Mindre god	Ja	Jeg klarer mig godt	I mindre grad	ja, 1-5 cigaretter om dagen	Ja - Fødevarer, jordbrug og oplevelser		Agri College	0	0	0	1	0				15-25 minutter	18
Mand	18	40	0	1	0	0	0	0		I høj grad	I nogen grad	I høj grad	I høj grad	I mindre grad	I høj grad	Slet ikke	Slet ikke	I meget høj grad	I høj grad	I høj grad	I høj grad	I høj grad	Gode	Gode	Gode	Meget dårlige	Middel	Nej	Spadserer, cykler eller har anden lettere motion mindst 4 timer om ugen (medregn også cykling/gang til skole)	God	Ja	Jeg klarer mig middelt	I høj grad	Nej	Ja - Fødevarer, jordbrug og oplevelser		Agri College Aalborg	0	0	0	1	0				30-40 minutter	18
			0	0	0	0	0	0																														0	1	0	0	0
Kvinde	18	55	1	0	1	0	0	0		Ved ikke	I nogen grad	I nogen grad	I høj grad	Slet ikke	Ved ikke	Ved ikke	I mindre grad	I nogen grad	I nogen grad	I høj grad	I høj grad	I nogen grad	Ved ikke	Dårlige	Dårlige	Ved ikke	Dårlige	Måske	Spadserer, cykler eller har anden lettere motion mindst 4 timer om ugen (medregn også cykling/gang til skole)	Nogenlunde	Ved ikke	Jeg klarer mig middelt	I mindre grad	Nej	Ja - Fødevarer, jordbrug og oplevelser		Tech College, Aalborg - FOOD	0	0	0	1	0				45 - over 60 min	18
Mand	18	20	0	1	0	1	0	0		I høj grad	I meget høj grad	I meget høj grad	I meget høj grad	I meget høj grad	I nogen grad	Slet ikke	I mindre grad	I meget høj grad	I høj grad	I meget høj grad	I meget høj grad	I meget høj grad	Middel	Meget gode	Meget gode	Dårlige	Meget gode	Nej	Dyrker motionsidræt, løber eller lignende mindst 4 timer om ugen	God	Ja	Jeg klarer mig godt	I meget høj grad	Nej	Ja - Fødevarer, jordbrug og oplevelser		aalborg tech	0	0	0	1	0				15-25 minutter	18
Kvinde	17	20	0	1	0	1	1	0		I nogen grad	I mindre grad	I nogen grad	I nogen grad	I nogen grad	I nogen grad	I mindre grad	I nogen grad	I nogen grad	I nogen grad	I nogen grad	I nogen grad	I nogen grad	Gode	Gode	Gode	Ved ikke	Ved ikke	Nej	Læser, ser fjernsyn eller har anden stillesiddende beskæftigelse	Mindre god	Ved ikke	Jeg klarer mig middelt	I høj grad	Ja, mere en 11 cigaretter om dagen	Ja - Omsorg, sundhed og pædagogik		Aalborg Tech	0	0	0	1	0				15-25 minutter	17
			0	0	0	0	0	0																														0	1	0	0	0
Mand	18	50	1	1	1	1	0	0		I meget høj grad	I høj grad	I meget høj grad	I høj grad	I nogen grad	I høj grad	Ved ikke	I mindre grad	I meget høj grad	Ved ikke	I høj grad	I meget høj grad	Ved ikke	Middel	Middel	Middel	Ved ikke	Ved ikke	Måske	Spadserer, cykler eller har anden lettere motion mindst 4 timer om ugen (medregn også cykling/gang til skole)	Mindre god	Ja	Jeg klarer mig middelt	I nogen grad	Ja en gang imellem til fester	Ja - Teknologi, byggeri og transport.		Euc Nordvestsjælland	0	0	0	1	0				45 - over 60 min	18
Mand	18	25	0	1	0	0	0	0		I høj grad	I mindre grad	I mindre grad	I mindre grad	I nogen grad	I nogen grad	Slet ikke	I nogen grad	I nogen grad	I mindre grad	I mindre grad	I nogen grad	I nogen grad	Dårlige	Dårlige	Dårlige	Ved ikke	Ved ikke	Ved ikke	Læser, ser fjernsyn eller har anden stillesiddende beskæftigelse	Mindre god	Nej	Jeg klarer mig godt	I nogen grad	Ja en gang imellem til fester	Ja - Fødevarer, jordbrug og oplevelser		celf nykøbing f	0	0	0	1	0				15-25 minutter	18
Kvinde	16	40	0	0	1	0	0	0		I mindre grad	I nogen grad	I mindre grad	I mindre grad	I mindre grad	I mindre grad	I nogen grad	I mindre grad	I mindre grad	I nogen grad	Slet ikke	I mindre grad	Slet ikke	Middel	Middel	Middel	Middel	Meget dårlige	Nej	Dyrker motionsidræt, løber eller lignende mindst 4 timer om ugen	Nogenlunde	Nej	Jeg klarer mig godt	I høj grad	ja, 1-5 cigaretter om dagen	Ja - Omsorg, sundhed og pædagogik		Aalborg tech college	0	0	0	1	0				30-40 minutter	16
Kvinde	17	30	0	0	1	0	0	0		I høj grad	I høj grad	I høj grad	I høj grad	I mindre grad	I nogen grad	Slet ikke	Slet ikke	I høj grad	I nogen grad	I nogen grad	I nogen grad	I nogen grad	Dårlige	Middel	Middel	Dårlige	Middel	Nej	Læser, ser fjernsyn eller har anden stillesiddende beskæftigelse	Nogenlunde	Nej	Jeg klarer mig godt	I høj grad					0	0	1	0	0				30-40 minutter	17
Mand	17	30	0	0	0	1	0	0		I høj grad	I høj grad	I høj grad	I høj grad	I høj grad	I høj grad	Slet ikke	Slet ikke	I høj grad	I høj grad	I høj grad	I høj grad	Slet ikke	Middel	Gode	Middel	Middel	Meget dårlige	Måske	Dyrker motionsidræt, løber eller lignende mindst 4 timer om ugen	God	Ja	Jeg klarer mig godt	I nogen grad	Ja en gang imellem til fester	Ja - Fødevarer, jordbrug og oplevelser		Nyk.f	0	0	0	1	0				30-40 minutter	17
Kvinde	17	20	0	0	0	0	0	1	Hjj	Ved ikke	Ved ikke	Ved ikke	Ved ikke	Ved ikke	Ved ikke	Ved ikke	Ved ikke	Ved ikke	Ved ikke	Ved ikke	Ved ikke	Ved ikke	Ved ikke	Ved ikke	Ved ikke	Ved ikke	Ved ikke	Ved ikke	Træner hårdt og dyrker konkurrenceidræt regelmæssigt og flere gange om ugen	God	Ved ikke	Jeg klarer mig godt	Ved ikke	Nej	Ja - Omsorg, sundhed og pædagogik		Hk	0	0	0	1	0				15-25 minutter	17
			0	0	0	0	0	0																														0	1	0	0	0
Mand	17	5	1	0	0	0	0	0		I nogen grad	Slet ikke	Slet ikke	I nogen grad	Slet ikke	I nogen grad	I nogen grad	I høj grad	I nogen grad	I mindre grad	I høj grad	I høj grad	I høj grad	Middel	Middel	Middel	Dårlige	Ved ikke	Ja	Læser, ser fjernsyn eller har anden stillesiddende beskæftigelse	Dårlig	Ved ikke	Jeg klarer mig godt	I mindre grad	Nej	Ja - Teknologi, byggeri og transport.		Aarhus Tech	0	0	0	1	0				0-10 minutter	17
			0	0	0	0	0	0																														0	1	0	0	0
Mand	17	5	1	0	0	0	0	0		I nogen grad	I mindre grad	I nogen grad	I nogen grad	I mindre grad	I høj grad	Slet ikke	I mindre grad	I nogen grad	Slet ikke	Slet ikke	I mindre grad	I nogen grad	Gode	Middel	Middel	Meget dårlige	Meget dårlige	Nej	Dyrker motionsidræt, løber eller lignende mindst 4 timer om ugen	Mindre god	Nej	Jeg klarer mig middelt	I høj grad	Nej	Ja - Teknologi, byggeri og transport.		EUC NVS	0	0	0	1	0				0-10 minutter	17
Kvinde	19	5	0	0	1	0	0	1	5 min midt i timen	Slet ikke	I mindre grad	I mindre grad	I nogen grad	Slet ikke	I mindre grad	I nogen grad	I høj grad	I mindre grad	I mindre grad	I mindre grad	I mindre grad	I mindre grad	Gode	Middel	Gode	Meget dårlige	Meget dårlige	Måske	Spadserer, cykler eller har anden lettere motion mindst 4 timer om ugen (medregn også cykling/gang til skole)	Nogenlunde	Ved ikke	Jeg klarer mig middelt	I nogen grad	Nej	Ja - Omsorg, sundhed og pædagogik		Aalborg Tech	0	0	0	1	0				0-10 minutter	19
			0	0	0	0	0	0																														0	1	0	0	0
Mand	18	15	0	0	1	0	0	0		I høj grad	I høj grad	I høj grad	I høj grad	I høj grad	I høj grad	Slet ikke	Slet ikke	I høj grad	I høj grad	I høj grad	I høj grad	I nogen grad	Gode	Gode	Gode	Gode	Gode	Nej	Dyrker motionsidræt, løber eller lignende mindst 4 timer om ugen	Nogenlunde	Ja	Jeg klarer mig middelt	I høj grad	Nej	Ja - Teknologi, byggeri og transport.		Skive teknisk skolen	0	0	0	1	0				15-25 minutter	18
Mand	17	10	1	0	0	1	0	0		Slet ikke	I mindre grad	I nogen grad	Slet ikke	Slet ikke	Slet ikke	I mindre grad	I nogen grad	I meget høj grad	I nogen grad	Ved ikke	I nogen grad	I mindre grad	Middel	Middel	Middel	Dårlige	Ved ikke	Måske	Læser, ser fjernsyn eller har anden stillesiddende beskæftigelse	Virkelig god	Nej	Jeg klarer mig middelt	I høj grad	Nej	Ja - Teknologi, byggeri og transport.		Den her	0	0	0	1	0				0-10 minutter	17
			0	0	0	0	0	0																														0	1	0	0	0
			0	0	0	0	0	0																														0	1	0	0	0
			0	0	0	0	0	0																														0	1	0	0	0
			0	0	0	0	0	0																														0	1	0	0	0
Mand	16	5	0	1	0	0	0	0		I nogen grad	I høj grad	I høj grad	I høj grad	I mindre grad	I nogen grad	I nogen grad	I høj grad	I nogen grad	I høj grad	I høj grad	I høj grad	I høj grad	Middel	Dårlige	Gode	Meget dårlige	Middel	Ja	Læser, ser fjernsyn eller har anden stillesiddende beskæftigelse	Mindre god	Ved ikke	Jeg klarer mig godt	I høj grad	Nej	Ja - Teknologi, byggeri og transport.		CELF Nykøbing F.	0	0	0	1	0				0-10 minutter	16
Mand	16	over 60	0	0	1	0	0	0		I meget høj grad	Ved ikke	I nogen grad	I nogen grad	I mindre grad	I nogen grad	I mindre grad	I høj grad	I nogen grad	Slet ikke	I høj grad	I mindre grad	I meget høj grad	Gode	Meget gode	Dårlige	Meget dårlige	Meget dårlige	Nej	Spadserer, cykler eller har anden lettere motion mindst 4 timer om ugen (medregn også cykling/gang til skole)	Nogenlunde	Nej	Jeg klarer mig middelt	I meget høj grad	Nej	Ja - Teknologi, byggeri og transport.		Århus tech	0	0	0	1	0				45 - over 60 min	16
			0	0	0	0	0	0																														0	1	0	0	0
Mand	18	30	1	0	1	0	0	0		I nogen grad	I nogen grad	I nogen grad	I nogen grad	I nogen grad	I nogen grad	Slet ikke	Slet ikke	I nogen grad	I meget høj grad	I meget høj grad	I meget høj grad	I meget høj grad	Meget gode	Meget gode	Meget gode	Dårlige	Dårlige	Nej	Spadserer, cykler eller har anden lettere motion mindst 4 timer om ugen (medregn også cykling/gang til skole)	Nogenlunde	Ja	Jeg klarer mig godt	I meget høj grad	ja, 1-5 cigaretter om dagen	Ja - Fødevarer, jordbrug og oplevelser		Tech college	0	0	0	1	0				30-40 minutter	18
Mand	18	10	0	1	0	0	0	0		I høj grad	I meget høj grad	I meget høj grad	I meget høj grad	I nogen grad	I høj grad	Slet ikke	Slet ikke	I meget høj grad	I nogen grad	I høj grad	I meget høj grad	I nogen grad	Dårlige	Dårlige	Dårlige	Dårlige	Meget dårlige	Nej	Spadserer, cykler eller har anden lettere motion mindst 4 timer om ugen (medregn også cykling/gang til skole)	Nogenlunde	Ja	Jeg klarer mig godt	I mindre grad	Nej	Ja - Fødevarer, jordbrug og oplevelser		Celf Nykøbing F	0	0	0	1	0				0-10 minutter	18
Mand	17	10	0	1	0	0	0	0		Ved ikke	Slet ikke	Slet ikke	I meget høj grad	Ved ikke	I nogen grad	Ved ikke	I nogen grad	I meget høj grad	I meget høj grad	I meget høj grad	I mindre grad	I høj grad	Middel	Gode	Middel	Ved ikke	Ved ikke	Nej	Læser, ser fjernsyn eller har anden stillesiddende beskæftigelse	Mindre god	Ved ikke	Jeg klarer mig godt	I høj grad	ja, 1-5 cigaretter om dagen	Ja - Teknologi, byggeri og transport.		Celf Nykøbing f	0	0	0	1	0				0-10 minutter	17
Mand	18	35	0	1	0	0	0	0		I høj grad	I høj grad	I høj grad	I høj grad	I nogen grad	I høj grad	Slet ikke	I høj grad	I mindre grad	I høj grad	I høj grad	I meget høj grad	I nogen grad	Gode	Ved ikke	Meget gode	Ved ikke	Meget gode	Nej	Træner hårdt og dyrker konkurrenceidræt regelmæssigt og flere gange om ugen	God	Ja	Jeg klarer mig godt	I meget høj grad	ja, 1-5 cigaretter om dagen	Ja - Fødevarer, jordbrug og oplevelser			0	0	0	1	0				30-40 minutter	18
Mand	17	15	1	1	0	0	0	0		Slet ikke	Slet ikke	Slet ikke	Slet ikke	Slet ikke	Slet ikke	Slet ikke	Slet ikke	Slet ikke	Slet ikke	Slet ikke	Slet ikke	Slet ikke	Meget dårlige	Meget dårlige	Meget dårlige	Meget dårlige	Meget dårlige	Ja	Læser, ser fjernsyn eller har anden stillesiddende beskæftigelse	Dårlig	Nej	Jeg klarer mig slet ikke godt	Slet ikke	Ja, mere en 11 cigaretter om dagen	Ja - Fødevarer, jordbrug og oplevelser		Aarhus tech	0	0	0	1	0				15-25 minutter	17
Mand	17	10	0	1	0	0	0	0		I høj grad	I høj grad	I nogen grad	I høj grad	I nogen grad	I nogen grad	Slet ikke	Slet ikke	I meget høj grad	I nogen grad	I mindre grad	I høj grad	I høj grad	Ved ikke	Gode	Ved ikke	Ved ikke	Ved ikke	Nej	Spadserer, cykler eller har anden lettere motion mindst 4 timer om ugen (medregn også cykling/gang til skole)	Nogenlunde	Ja	Jeg klarer mig meget godt	I nogen grad	ja, 1-5 cigaretter om dagen	Ja - Teknologi, byggeri og transport.		EUC syd Sønderborg	0	0	0	1	0				0-10 minutter	17
			0	0	0	0	0	0																														0	1	0	0	0
Mand	16	25	1	1	0	1	0	0		I høj grad	I nogen grad	I høj grad	I høj grad	I nogen grad	I nogen grad	Slet ikke	Slet ikke	I nogen grad	I nogen grad	I nogen grad	I høj grad	I nogen grad	Gode	Middel	Gode	Ved ikke	Ved ikke	Nej	Træner hårdt og dyrker konkurrenceidræt regelmæssigt og flere gange om ugen	Nogenlunde	Ja	Jeg klarer mig meget godt	I høj grad	ja, 1-5 cigaretter om dagen	Ja - Teknologi, byggeri og transport.		EUC syd sønderborg	0	0	0	1	0				15-25 minutter	16
Mand	17	0	0	0	0	0	1	0																														0	0	1	0	0				0-10 minutter	17
Mand	17	5	0	0	1	1	0	0		I høj grad	I meget høj grad	I meget høj grad	I meget høj grad	I mindre grad	I nogen grad	Slet ikke	Slet ikke	I meget høj grad	I høj grad	I høj grad	I høj grad	I meget høj grad	Gode	Meget gode	Meget gode	Meget gode	Gode	Nej	Spadserer, cykler eller har anden lettere motion mindst 4 timer om ugen (medregn også cykling/gang til skole)	Nogenlunde	Ja	Jeg klarer mig middelt	I meget høj grad	Ja en gang imellem til fester	Ja - Teknologi, byggeri og transport.		Skive teknisk skole	0	0	0	1	0				0-10 minutter	17
Mand	17	40	0	0	0	0	0	1	Lavede noget i timerne	I nogen grad	I høj grad	I høj grad	I høj grad	I nogen grad	I meget høj grad	I mindre grad	I nogen grad	I høj grad	I mindre grad	I nogen grad	I høj grad	Ved ikke	Gode	Middel	Middel	Dårlige	Dårlige	Nej	Spadserer, cykler eller har anden lettere motion mindst 4 timer om ugen (medregn også cykling/gang til skole)	Mindre god	Ja	Jeg klarer mig ikke så godt	I mindre grad	ja, 1-5 cigaretter om dagen	Ja - Teknologi, byggeri og transport.		Aarhustech	0	0	0	1	0				30-40 minutter	17
Mand	17	30	1	1	0	1	1	0		I nogen grad	I nogen grad	Ved ikke	I nogen grad	I mindre grad	I nogen grad	Slet ikke	I nogen grad	I nogen grad	I nogen grad	Ved ikke	Slet ikke	I nogen grad	Middel	Middel	Gode	Gode	Ved ikke	Måske	Læser, ser fjernsyn eller har anden stillesiddende beskæftigelse	Nogenlunde	Ja	Jeg klarer mig middelt	Ved ikke	Nej	Ja - Teknologi, byggeri og transport.		EUC Nordvestsjælland	0	0	0	1	0				30-40 minutter	17
Mand	16	5	0	0	1	0	0	0		I mindre grad	I nogen grad	I mindre grad	I nogen grad	I nogen grad	I mindre grad	I høj grad	I høj grad	I nogen grad	I nogen grad	I nogen grad	I nogen grad	I nogen grad	Gode	Gode	Gode	Middel	Middel	Nej	Spadserer, cykler eller har anden lettere motion mindst 4 timer om ugen (medregn også cykling/gang til skole)	God	Ja	Jeg klarer mig meget godt	I meget høj grad	Ja en gang imellem til fester	Ja - Teknologi, byggeri og transport.		Skive Tekniske skole	0	0	0	1	0				0-10 minutter	16
Mand	16	15	0	0	1	0	0	0		I nogen grad	I høj grad	I høj grad	I meget høj grad	I mindre grad	I høj grad	I mindre grad	I mindre grad	I meget høj grad	Slet ikke	I høj grad	I høj grad	I høj grad	Gode	Middel	Gode	Ved ikke	Ved ikke	Nej	Læser, ser fjernsyn eller har anden stillesiddende beskæftigelse	God	Ja	Jeg klarer mig middelt	I nogen grad	Ja en gang imellem til fester	Ja - Teknologi, byggeri og transport.		Skive Tekniske Skole	0	0	0	1	0				15-25 minutter	16
Mand	16	30	0	0	1	0	1	0		I meget høj grad	I meget høj grad	I meget høj grad	I meget høj grad	I nogen grad	I meget høj grad	Slet ikke	Slet ikke	I meget høj grad	Slet ikke	Slet ikke	I meget høj grad	I meget høj grad	Middel	Dårlige	Middel	Dårlige	Middel	Nej	Dyrker motionsidræt, løber eller lignende mindst 4 timer om ugen									0	0	1	0	0				30-40 minutter	16
Mand	18	5	0	1	0	1	0	0		I nogen grad	Ved ikke	I nogen grad	I nogen grad	Ved ikke	I mindre grad	Slet ikke	I nogen grad	I nogen grad	I nogen grad	I høj grad	I høj grad	I høj grad	Gode	Middel	Meget gode	Middel	Middel	Ja	Træner hårdt og dyrker konkurrenceidræt regelmæssigt og flere gange om ugen	Nogenlunde	Nej	Jeg klarer mig godt	I høj grad	Nej	Ja - Omsorg, sundhed og pædagogik		Sosu Esbjerg	0	0	0	1	0				0-10 minutter	18
Mand	17	45	0	0	1	0	0	0		I høj grad	I nogen grad	I nogen grad	I høj grad	I høj grad	I høj grad	I høj grad	I mindre grad	I høj grad	I mindre grad	I høj grad	I høj grad	I høj grad	Middel	Middel	Dårlige	Gode	Gode	Nej	Spadserer, cykler eller har anden lettere motion mindst 4 timer om ugen (medregn også cykling/gang til skole)	Nogenlunde	Ved ikke	Jeg klarer mig middelt	I mindre grad	Ja en gang imellem til fester	Ja - Teknologi, byggeri og transport.		SkiveTS	0	0	0	1	0				45 - over 60 min	17
Mand	18	20	0	0	1	0	0	0		I nogen grad	I nogen grad	I nogen grad	I nogen grad	I nogen grad	I nogen grad	I nogen grad	I nogen grad	I nogen grad	I meget høj grad	I nogen grad	I meget høj grad	Ved ikke	Meget dårlige	Meget gode	Meget gode	Meget gode	Ved ikke	Nej	Læser, ser fjernsyn eller har anden stillesiddende beskæftigelse	Nogenlunde	Ja	Jeg klarer mig middelt	Slet ikke	Ja, mere en 11 cigaretter om dagen	Ja - Teknologi, byggeri og transport.		bornholms erversskole	0	0	0	1	0				15-25 minutter	18
Mand	18	30	0	0	1	0	0	0		Slet ikke	I nogen grad	Slet ikke	I mindre grad	Slet ikke	I mindre grad	I nogen grad	I høj grad	I mindre grad	I nogen grad	I høj grad	I høj grad	I nogen grad	Gode	Gode	Middel	Meget dårlige	Dårlige	Ja	Spadserer, cykler eller har anden lettere motion mindst 4 timer om ugen (medregn også cykling/gang til skole)	Mindre god	Nej	Jeg klarer mig godt	I høj grad	Ja en gang imellem til fester	Ja - Teknologi, byggeri og transport.		Skive Teknisk Gymnasium	0	0	0	1	0				30-40 minutter	18
Mand	17	over 60	0	0	1	1	1	0		I nogen grad	I nogen grad	I mindre grad	I nogen grad	Slet ikke	I nogen grad	I mindre grad	I nogen grad	I nogen grad	I nogen grad	I nogen grad	I nogen grad	I mindre grad	Middel	Gode	Gode	Middel	Gode	Ja	Spadserer, cykler eller har anden lettere motion mindst 4 timer om ugen (medregn også cykling/gang til skole)	Nogenlunde	Ja	Jeg klarer mig godt	I meget høj grad	Nej	Ja - Teknologi, byggeri og transport.		Skive ts	0	0	0	1	0				45 - over 60 min	17
			0	0	0	0	0	0																														0	1	0	0	0
Mand	17	5	1	0	0	0	0	0		I nogen grad	I mindre grad	Slet ikke	I mindre grad	Slet ikke	Slet ikke	I nogen grad	I nogen grad	Slet ikke	I mindre grad	Slet ikke	Slet ikke	Slet ikke	Ved ikke	Ved ikke	Ved ikke	Ved ikke	Ved ikke	Ved ikke	Træner hårdt og dyrker konkurrenceidræt regelmæssigt og flere gange om ugen	Nogenlunde	Nej	Jeg klarer mig godt	I høj grad	Ja en gang imellem til fester	Ja - Teknologi, byggeri og transport.		Aarhus tech	0	0	0	1	0				0-10 minutter	17
Mand	17	20	0	1	0	1	0	0		I høj grad	I høj grad	I nogen grad	I nogen grad	I mindre grad	I nogen grad	I nogen grad	I meget høj grad	I høj grad	I meget høj grad	I meget høj grad	I meget høj grad	I høj grad	Meget gode	Gode	Gode	Meget dårlige	Dårlige	Nej	Spadserer, cykler eller har anden lettere motion mindst 4 timer om ugen (medregn også cykling/gang til skole)	God	Nej	Jeg klarer mig godt	I høj grad	ja, 6-10 cigaretter om dagen	Ja - Teknologi, byggeri og transport.		CELF Nykøbing Falster	0	0	0	1	0				15-25 minutter	17
Mand	17	over 60	0	0	1	1	1	0		I meget høj grad	I meget høj grad	I meget høj grad	I meget høj grad	I nogen grad	I meget høj grad	I mindre grad	I høj grad	I meget høj grad																				0	0	1	0	0				45 - over 60 min	17
Mand	17	15	0	0	1	0	0	0		I høj grad	Ved ikke	I høj grad	I høj grad	I mindre grad	I høj grad	Slet ikke	Slet ikke	I høj grad	I meget høj grad	I meget høj grad	I meget høj grad	I høj grad	Gode	Middel	Gode	Middel	Meget dårlige	Nej	Spadserer, cykler eller har anden lettere motion mindst 4 timer om ugen (medregn også cykling/gang til skole)	Nogenlunde	Ja	Jeg klarer mig godt	I høj grad	Nej	Ja - Teknologi, byggeri og transport.		Frederikshavn EUC Nord	0	0	0	1	0				15-25 minutter	17
Mand	17	20	0	1	0	0	0	0		I høj grad	I nogen grad	I høj grad	I nogen grad	I nogen grad	I høj grad	Slet ikke	I mindre grad	I høj grad	I høj grad	I nogen grad	I høj grad	I høj grad	Middel	Middel	Middel	Dårlige	Middel	Nej	Træner hårdt og dyrker konkurrenceidræt regelmæssigt og flere gange om ugen	Nogenlunde	Ja	Jeg klarer mig middelt	I høj grad	Nej	Ja - Teknologi, byggeri og transport.		CELF Nykøbing falster	0	0	0	1	0				15-25 minutter	17
Mand	18	30	0	0	1	0	0	0		I nogen grad	Ved ikke	I meget høj grad	Ved ikke	Ved ikke	I meget høj grad	Slet ikke	Ved ikke	I meget høj grad	I meget høj grad	I meget høj grad	I meget høj grad	I meget høj grad	Ved ikke	Ved ikke	Ved ikke	Ved ikke	Ved ikke	Nej	Træner hårdt og dyrker konkurrenceidræt regelmæssigt og flere gange om ugen	God	Ja	Jeg klarer mig meget godt	I nogen grad	Nej	Ja - Teknologi, byggeri og transport.		euc nordvestsjælland	0	0	0	1	0				30-40 minutter	18
Mand	17	5	0	0	0	1	1	1	en gang om ugen hvor vi gik 30 min som det eneste	I meget høj grad	I høj grad	I meget høj grad	I meget høj grad	I høj grad	I meget høj grad	Slet ikke	I meget høj grad	I meget høj grad	Slet ikke	Slet ikke	Slet ikke	Slet ikke	Dårlige	Gode	Middel	Meget dårlige	Meget dårlige	Nej	Spadserer, cykler eller har anden lettere motion mindst 4 timer om ugen (medregn også cykling/gang til skole)	Nogenlunde	Ja	Jeg klarer mig godt	I nogen grad	Ja en gang imellem til fester	Nej - jeg ved ikke hvilket hovedområde, jeg er tilknyttet (skriv gerne hvad din uddannelse hedder)	Biler, teknologi og industreiel design	Mercantec viborg	0	0	0	1	0				0-10 minutter	17
			0	0	0	0	0	0																														0	1	0	0	0
Kvinde	16	30	0	0	1	1	1	0		I høj grad	I nogen grad	I høj grad	I høj grad	I nogen grad	I høj grad	I mindre grad	I mindre grad	I høj grad	I høj grad	I høj grad	I høj grad	I høj grad	Meget gode	Meget gode	Middel	Dårlige	Meget gode	Ja	Spadserer, cykler eller har anden lettere motion mindst 4 timer om ugen (medregn også cykling/gang til skole)	God	Ja	Jeg klarer mig meget godt	I høj grad	Nej	Ja - Fødevarer, jordbrug og oplevelser		Agri College TECHCOLLEGE	0	0	0	1	0				30-40 minutter	16
Mand	17	over 60	0	1	0	0	0	0		I høj grad	I nogen grad	I mindre grad	I nogen grad	I mindre grad	I meget høj grad	I nogen grad	I nogen grad	I nogen grad	I mindre grad	I meget høj grad	I nogen grad	I mindre grad	Middel	Middel	Middel	Meget dårlige	Ved ikke	Måske	Træner hårdt og dyrker konkurrenceidræt regelmæssigt og flere gange om ugen	Virkelig god	Ja	Jeg klarer mig godt	I nogen grad	Nej	Ja - Teknologi, byggeri og transport.		celf nykøbing	0	0	0	1	0				45 - over 60 min	17
Mand	16	15	0	1	0	0	0	0		I nogen grad	I nogen grad	I nogen grad	I meget høj grad	Slet ikke	I mindre grad	Slet ikke	Slet ikke	I meget høj grad	I meget høj grad	Slet ikke	Slet ikke	Slet ikke	Gode	Gode	Gode	Meget dårlige	Gode	Nej	Læser, ser fjernsyn eller har anden stillesiddende beskæftigelse	Nogenlunde	Ved ikke	Jeg klarer mig godt	I høj grad	Nej	Ja - Teknologi, byggeri og transport.		CELF Kringelborg allé, Nykøbing F	0	0	0	1	0				15-25 minutter	16
Mand	18	over 60	0	0	0	0	1	0		I høj grad	I mindre grad	I nogen grad	I nogen grad	Slet ikke	I høj grad	Slet ikke	I mindre grad	I nogen grad	I nogen grad	I høj grad	I mindre grad	I høj grad	Meget dårlige	Dårlige	Meget dårlige	Meget gode	Meget gode	Måske	Træner hårdt og dyrker konkurrenceidræt regelmæssigt og flere gange om ugen	Virkelig god	Nej	Jeg klarer mig godt	I mindre grad	Nej	Ja - Teknologi, byggeri og transport.		Århus tech	0	0	0	1	0				45 - over 60 min	18
			0	0	0	0	0	0																														0	1	0	0	0
Mand	17	20	0	1	1	0	0	0		I høj grad	I høj grad	I høj grad	I høj grad	Slet ikke	Slet ikke	Slet ikke	I høj grad	I høj grad	I mindre grad	I høj grad	I høj grad	I høj grad	Middel	Middel	Meget dårlige	Meget dårlige	Dårlige	Nej	Læser, ser fjernsyn eller har anden stillesiddende beskæftigelse	Nogenlunde	Ja	Jeg klarer mig godt	I meget høj grad	Nej	Nej - jeg ved ikke hvilket hovedområde, jeg er tilknyttet (skriv gerne hvad din uddannelse hedder)	Lastvogns mekaniker	CELF	0	0	0	1	0				15-25 minutter	17
Mand	16	10	0	1	0	1	0	0		I høj grad	I nogen grad	I nogen grad	I nogen grad	I nogen grad	I høj grad	I mindre grad	I mindre grad	I høj grad	I nogen grad	I nogen grad	I høj grad	I nogen grad	Gode	Gode	Gode	Gode	Ved ikke	Nej	Træner hårdt og dyrker konkurrenceidræt regelmæssigt og flere gange om ugen	God	Ja	Jeg klarer mig middelt	I nogen grad	Ja en gang imellem til fester	Ja - Teknologi, byggeri og transport.		CELF nyk.F	0	0	0	1	0				0-10 minutter	16
Mand	16		0	0	0	0	0	0																														0	0	1	0	0					16
Mand	16	20	0	1	0	0	0	0																														0	0	1	0	0				15-25 minutter	16
Kvinde	16	40	1	0	0	0	1	0		I høj grad	I mindre grad	I nogen grad	I nogen grad	I nogen grad	I nogen grad	I nogen grad	I nogen grad	I nogen grad	I nogen grad	I nogen grad	I høj grad	I nogen grad	Middel	Middel	Gode	Ved ikke	Ved ikke	Nej										0	0	1	0	0				30-40 minutter	16
Mand	16	20	0	1	0	0	0	0		I meget høj grad	I høj grad	I nogen grad	I høj grad	Slet ikke	I høj grad	Slet ikke	I mindre grad	I nogen grad	I høj grad	I nogen grad	I høj grad	I høj grad	Gode	Gode	Gode	Ved ikke	Gode	Måske	Spadserer, cykler eller har anden lettere motion mindst 4 timer om ugen (medregn også cykling/gang til skole)	Mindre god	Ved ikke	Jeg klarer mig godt	I nogen grad	ja, 6-10 cigaretter om dagen	Ja - Teknologi, byggeri og transport.		celf	0	0	0	1	0				15-25 minutter	16
Kvinde	16	30	0	0	1	0	0	0		I nogen grad	Ved ikke	Slet ikke	I nogen grad	Ved ikke	I nogen grad	I mindre grad	I mindre grad	I høj grad	I mindre grad	I høj grad	I høj grad	I mindre grad	Gode	Dårlige	Gode	Ved ikke	Gode	Nej	Læser, ser fjernsyn eller har anden stillesiddende beskæftigelse	Mindre god	Ja	Jeg klarer mig middelt	I mindre grad	Nej	Ja - Teknologi, byggeri og transport.		Syddansk Erhvervsskole Vejle	0	0	0	1	0				30-40 minutter	16
Kvinde	17	15	1	0	0	1	0	0		I meget høj grad	I nogen grad	I høj grad	I meget høj grad	I nogen grad	I meget høj grad	Slet ikke	Slet ikke	I meget høj grad	I høj grad	I høj grad	I meget høj grad	I nogen grad	Meget gode	Middel	Gode	Middel	Middel	Nej	Spadserer, cykler eller har anden lettere motion mindst 4 timer om ugen (medregn også cykling/gang til skole)	Nogenlunde	Ja	Jeg klarer mig godt	I høj grad	Nej	Ja - Omsorg, sundhed og pædagogik		Sosufyn	0	0	0	1	0				15-25 minutter	17
Mand	16	45	0	0	1	0	0	0		I mindre grad	I mindre grad	I mindre grad	I mindre grad	I mindre grad	I mindre grad	I mindre grad	I mindre grad	I mindre grad	I nogen grad	I nogen grad	I nogen grad	I nogen grad	Middel	Middel	Middel	Middel	Middel	Ja	Spadserer, cykler eller har anden lettere motion mindst 4 timer om ugen (medregn også cykling/gang til skole)	God	Ved ikke	Ved ikke	Ved ikke	ja, 1-5 cigaretter om dagen	Ja - Teknologi, byggeri og transport.		Skive	0	0	0	1	0				45 - over 60 min	16
			0	0	0	0	0	0																														0	1	0	0	0
			0	0	0	0	0	0																														0	1	0	0	0
Kvinde	18	45	0	1	1	0	0	0		I meget høj grad	I meget høj grad	I nogen grad	I meget høj grad	Slet ikke	I nogen grad	Slet ikke	Slet ikke	I meget høj grad	I nogen grad	I høj grad	I høj grad	I høj grad	Middel	Meget gode	Middel	Meget gode	Meget gode	Ja	Spadserer, cykler eller har anden lettere motion mindst 4 timer om ugen (medregn også cykling/gang til skole)	God	Ja	Jeg klarer mig middelt	I høj grad	Ja, mere en 11 cigaretter om dagen	Ja - Omsorg, sundhed og pædagogik		Sosu	0	0	0	1	0				45 - over 60 min	18
Mand	17	15	0	1	0	0	0	0		Slet ikke	Slet ikke	Slet ikke	I nogen grad	Slet ikke	Slet ikke	I mindre grad	I høj grad	I nogen grad	I nogen grad	I nogen grad	I nogen grad	I nogen grad	Middel	Dårlige	Middel	Dårlige	Dårlige	Nej	Læser, ser fjernsyn eller har anden stillesiddende beskæftigelse	Dårlig	Ved ikke	Jeg klarer mig middelt	I mindre grad	Ja, mere en 11 cigaretter om dagen	Ja - Teknologi, byggeri og transport.		celf kringelborg	0	0	0	1	0				15-25 minutter	17
			0	0	0	0	0	0																														0	1	0	0	0
			0	0	0	0	0	0																														0	1	0	0	0
			0	0	0	0	0	0																														0	1	0	0	0
			0	0	0	0	0	0																														0	1	0	0	0
Mand	17	20	0	1	0	1	0	0		I høj grad	I meget høj grad	I høj grad	I meget høj grad	I mindre grad	I nogen grad	Slet ikke	Slet ikke	I meget høj grad	I mindre grad	I høj grad	I meget høj grad	I nogen grad	Gode	Meget gode	Gode	Ved ikke	Ved ikke	Nej	Dyrker motionsidræt, løber eller lignende mindst 4 timer om ugen	God	Ja	Jeg klarer mig godt	I høj grad	Nej	Ja - Fødevarer, jordbrug og oplevelser		CELF Nyk.F	0	0	0	1	0				15-25 minutter	17
Mand	16	5	0	0	0	0	0	1	Vi har spillet fodbold i timen hvis der ik har være noget at lave	I meget høj grad	I meget høj grad	I meget høj grad	I meget høj grad	I mindre grad	I meget høj grad	Slet ikke	I meget høj grad	I meget høj grad	I nogen grad	I nogen grad	I høj grad	Slet ikke	Meget gode	Middel	Gode	Ved ikke	Meget dårlige	Nej	Spadserer, cykler eller har anden lettere motion mindst 4 timer om ugen (medregn også cykling/gang til skole)	Mindre god	Ja	Jeg klarer mig godt	I høj grad	ja, 6-10 cigaretter om dagen	Ja - Fødevarer, jordbrug og oplevelser		Aarhus tech	0	0	0	1	0				0-10 minutter	16
			0	0	0	0	0	0																														0	1	0	0	0
Kvinde	17	over 60	0	0	0	0	0	1	Når vi havde sundhedsfremme	I meget høj grad	I meget høj grad	I meget høj grad	I meget høj grad	I høj grad	I meget høj grad	Slet ikke	Slet ikke	I meget høj grad	I nogen grad	I mindre grad	I høj grad	I meget høj grad	Middel	Meget gode	Meget gode	Gode	Gode	Nej	Spadserer, cykler eller har anden lettere motion mindst 4 timer om ugen (medregn også cykling/gang til skole)	Dårlig	Ja	Jeg klarer mig middelt	I meget høj grad	Ja en gang imellem til fester	Ja - Omsorg, sundhed og pædagogik		SOSU Fyn	0	0	0	1	0				45 - over 60 min	17
			0	0	0	0	0	0																														0	1	0	0	0
Kvinde	16	15	0	1	0	0	0	0		I meget høj grad	I nogen grad	I høj grad	I meget høj grad	I høj grad	I høj grad	I mindre grad	Slet ikke	I meget høj grad	I høj grad	I meget høj grad	I meget høj grad	I høj grad	Meget dårlige	Gode	Meget dårlige	Meget gode	Dårlige	Nej	Træner hårdt og dyrker konkurrenceidræt regelmæssigt og flere gange om ugen	Virkelig god	Ja	Jeg klarer mig godt	I høj grad	Nej	Ja - Fødevarer, jordbrug og oplevelser		Aarhus tech	0	0	0	1	0				15-25 minutter	16
Mand	17	15	0	1	0	0	0	0		I meget høj grad	I nogen grad	I nogen grad	I nogen grad	I mindre grad	I nogen grad	Slet ikke	I nogen grad	I nogen grad	I nogen grad	I nogen grad	I nogen grad	I nogen grad	Middel	Middel	Middel	Middel	Middel	Måske	Spadserer, cykler eller har anden lettere motion mindst 4 timer om ugen (medregn også cykling/gang til skole)	Mindre god	Ved ikke	Jeg klarer mig meget godt	I meget høj grad	Nej	Ja - Fødevarer, jordbrug og oplevelser		Agri College Aalborg	0	0	0	1	0				15-25 minutter	17
Kvinde	16	15	0	0	0	0	0	1	engang i mellem når læreren syntes	I meget høj grad	I høj grad	I høj grad	I meget høj grad	I mindre grad	I nogen grad	I høj grad	I nogen grad	I høj grad	I meget høj grad	I meget høj grad	I meget høj grad	I meget høj grad	Dårlige	Meget gode	Gode	Middel	Middel	Ja	Spadserer, cykler eller har anden lettere motion mindst 4 timer om ugen (medregn også cykling/gang til skole)	Nogenlunde	Ja	Jeg klarer mig middelt	I høj grad	Nej	Ja - Omsorg, sundhed og pædagogik		sosu fyn dalum	0	0	0	1	0				15-25 minutter	16
Kvinde	16	20	1	0	0	0	0	0		I nogen grad	I høj grad	I høj grad	I meget høj grad	I mindre grad	I nogen grad	I mindre grad	Slet ikke	I høj grad	I mindre grad	I nogen grad	I nogen grad	I nogen grad	Gode	Meget gode	Gode	Middel	Middel	Nej	Spadserer, cykler eller har anden lettere motion mindst 4 timer om ugen (medregn også cykling/gang til skole)	Mindre god	Ja	Jeg klarer mig middelt	I meget høj grad	Nej	Ja - Fødevarer, jordbrug og oplevelser		Aarhus Tech	0	0	0	1	0				15-25 minutter	16
Mand	16	over 60	1	1	1	1	1	0		I høj grad	I høj grad	I meget høj grad	I meget høj grad	I mindre grad	I høj grad	Slet ikke	Slet ikke	I høj grad	I høj grad	I nogen grad	I høj grad	I nogen grad	Middel	Meget gode	Middel	Meget dårlige	Gode	Ja	Spadserer, cykler eller har anden lettere motion mindst 4 timer om ugen (medregn også cykling/gang til skole)	Nogenlunde	Ja	Ved ikke	Ved ikke	Nej	Ja - Fødevarer, jordbrug og oplevelser		Aalborg tech	0	0	0	1	0				45 - over 60 min	16
Mand	17	15	0	1	0	0	0	0		I nogen grad	I høj grad	I mindre grad	I høj grad	Slet ikke	I mindre grad	Slet ikke	I mindre grad	I nogen grad	Slet ikke	I mindre grad	I mindre grad	I nogen grad	Gode	Middel	Gode	Ved ikke	Ved ikke	Nej	Dyrker motionsidræt, løber eller lignende mindst 4 timer om ugen	Mindre god	Ja	Jeg klarer mig meget godt	I høj grad	Ja en gang imellem til fester	Ja - Teknologi, byggeri og transport.		celf	0	0	0	1	0				15-25 minutter	17
Kvinde	17	50	0	0	0	0	1	0		Ved ikke	I nogen grad	Slet ikke	I mindre grad	I mindre grad	Slet ikke	I høj grad	I meget høj grad	Slet ikke	I mindre grad	I mindre grad	I nogen grad	I nogen grad	Meget dårlige	Meget dårlige	Middel	Middel	Ved ikke	Måske	Læser, ser fjernsyn eller har anden stillesiddende beskæftigelse	Nogenlunde	Nej	Jeg klarer mig meget godt	I meget høj grad	Ja, mere en 11 cigaretter om dagen	Ja - Omsorg, sundhed og pædagogik		Sosu Odense	0	0	0	1	0				45 - over 60 min	17
Kvinde	17	35	0	1	0	0	0	0		I meget høj grad	I meget høj grad	I meget høj grad	I meget høj grad	I nogen grad	I høj grad	Slet ikke	I høj grad	I meget høj grad	I mindre grad	I nogen grad	I mindre grad	I nogen grad	Meget gode	Gode	Gode	Meget gode	Dårlige	Nej	Læser, ser fjernsyn eller har anden stillesiddende beskæftigelse	Mindre god	Ved ikke	Jeg klarer mig middelt	I høj grad	Nej	Ja - Omsorg, sundhed og pædagogik		Sosu Esbjerg	0	0	0	1	0				30-40 minutter	17
Mand	18	45	0	0	1	0	0	0		I meget høj grad	I mindre grad	Ved ikke	Ved ikke	I mindre grad	I mindre grad	I nogen grad	I nogen grad	I nogen grad	I nogen grad	I nogen grad	I nogen grad	Ved ikke	Meget gode	Gode	Meget gode	Gode	Gode	Nej	Dyrker motionsidræt, løber eller lignende mindst 4 timer om ugen	God	Nej	Jeg klarer mig godt	I meget høj grad	Nej	Ja - Teknologi, byggeri og transport.		Skive tekniske skole	0	0	0	1	0				45 - over 60 min	18
Kvinde	18	30	0	1	1	0	0	0		I meget høj grad	I meget høj grad	I meget høj grad	I meget høj grad	I nogen grad	I meget høj grad	Slet ikke	Slet ikke	I meget høj grad	I nogen grad	Ved ikke	I høj grad	I meget høj grad	Meget gode	Meget gode	Meget gode	Meget gode	Meget dårlige	Nej	Spadserer, cykler eller har anden lettere motion mindst 4 timer om ugen (medregn også cykling/gang til skole)	Nogenlunde	Ja	Jeg klarer mig godt	I høj grad	Nej	Ja - Omsorg, sundhed og pædagogik		SOSU-skole	0	0	0	1	0				30-40 minutter	18
			0	0	0	0	0	0																														0	1	0	0	0
Mand	18	5	0	0	0	0	0	1	I timerne																													0	0	1	0	0				0-10 minutter	18
Mand	16	30	0	0	0	0	1	0		I meget høj grad	I nogen grad	Slet ikke	I nogen grad	I nogen grad	I nogen grad	Slet ikke	Slet ikke	I høj grad	I nogen grad	I mindre grad	I høj grad	I nogen grad	Gode	Gode	Gode	Ved ikke	Ved ikke	Nej	Spadserer, cykler eller har anden lettere motion mindst 4 timer om ugen (medregn også cykling/gang til skole)	Nogenlunde	Ja	Jeg klarer mig godt	I høj grad	Nej	Ja - Teknologi, byggeri og transport.		Euc	0	0	0	1	0				30-40 minutter	16
			0	0	0	0	0	0																														0	1	0	0	0
			0	0	0	0	0	0																														0	1	0	0	0
Kvinde	18	10	0	1	1	0	0	0		I meget høj grad	I høj grad	I høj grad	I meget høj grad	I høj grad	I nogen grad	Slet ikke	Slet ikke	I meget høj grad	I høj grad	I høj grad	I høj grad	I høj grad	Middel	Gode	Middel	Middel	Ved ikke	Nej	Spadserer, cykler eller har anden lettere motion mindst 4 timer om ugen (medregn også cykling/gang til skole)	God	Ja	Jeg klarer mig godt	I nogen grad	Nej	Ja - Omsorg, sundhed og pædagogik		Sosu Odense	0	0	0	1	0				0-10 minutter	18
Mand	17	20	0	1	0	0	0	0		I høj grad	I mindre grad	I nogen grad	I meget høj grad	Slet ikke	I mindre grad	Slet ikke	Slet ikke	I meget høj grad	Slet ikke	Slet ikke	I høj grad	I høj grad	Gode	Middel	Dårlige	Meget dårlige	Meget dårlige	Nej	Træner hårdt og dyrker konkurrenceidræt regelmæssigt og flere gange om ugen	Mindre god	Ja	Jeg klarer mig meget godt	I meget høj grad	Nej	Ja - Fødevarer, jordbrug og oplevelser		Aarhus tech	0	0	0	1	0				15-25 minutter	17
Kvinde	17	20	0	0	0	0	1	0		I mindre grad	I mindre grad	I mindre grad	I nogen grad	I mindre grad	I nogen grad	I mindre grad	I nogen grad	Slet ikke	I nogen grad	I mindre grad	I nogen grad	I mindre grad	Gode	Dårlige	Gode	Dårlige	Gode	Ja	Spadserer, cykler eller har anden lettere motion mindst 4 timer om ugen (medregn også cykling/gang til skole)	Mindre god	Nej	Jeg klarer mig godt	I høj grad	Ja, mere en 11 cigaretter om dagen	Ja - Omsorg, sundhed og pædagogik		SOSU vejle	0	0	0	1	0				15-25 minutter	17
Mand	18	15	0	1	0	1	1	0		I meget høj grad	I meget høj grad	I meget høj grad	I meget høj grad	I nogen grad	I meget høj grad	Slet ikke	Slet ikke	I meget høj grad	I høj grad	I høj grad	I høj grad	I høj grad	Middel	Gode	Dårlige	Dårlige	Middel	Nej	Læser, ser fjernsyn eller har anden stillesiddende beskæftigelse	Mindre god	Ja	Jeg klarer mig godt	I høj grad	Ja en gang imellem til fester	Ja - Fødevarer, jordbrug og oplevelser		Aarhus tech	0	0	0	1	0				15-25 minutter	18
Mand	17	10	1	0	0	1	1	0		I meget høj grad	I meget høj grad	I nogen grad	I høj grad	I meget høj grad	I mindre grad	Ved ikke	I mindre grad	I høj grad	I nogen grad	I høj grad	I mindre grad	I nogen grad	Middel	Dårlige	Middel	Middel	Gode	Ved ikke	Læser, ser fjernsyn eller har anden stillesiddende beskæftigelse	Nogenlunde	Ved ikke	Jeg klarer mig meget godt	I nogen grad	Nej	Ja - Teknologi, byggeri og transport.		Euc	0	0	0	1	0				0-10 minutter	17
			0	0	0	0	0	0																														0	1	0	0	0
			0	0	0	0	0	0																														0	1	0	0	0
Kvinde	17	20	0	0	0	1	0	0		I nogen grad	I nogen grad	I nogen grad	I meget høj grad	Slet ikke	I nogen grad	Slet ikke	Ved ikke	I høj grad	I nogen grad	Slet ikke	I nogen grad	I mindre grad	Dårlige	Meget gode	Middel	Dårlige	Ved ikke	Nej	Spadserer, cykler eller har anden lettere motion mindst 4 timer om ugen (medregn også cykling/gang til skole)	Nogenlunde	Ved ikke	Jeg klarer mig godt	I mindre grad	Nej	Ja - Omsorg, sundhed og pædagogik		Social- og Sundhedsskolen Fyn	0	0	0	1	0				15-25 minutter	17
Mand	17	15	0	1	0	0	0	0		I høj grad	I høj grad	I nogen grad	I høj grad	I mindre grad	I høj grad	Slet ikke	Slet ikke	I høj grad	I nogen grad	I høj grad	I høj grad	I høj grad	Dårlige	Middel	Middel	Ved ikke	Ved ikke	Nej	Spadserer, cykler eller har anden lettere motion mindst 4 timer om ugen (medregn også cykling/gang til skole)	Nogenlunde	Ja	Jeg klarer mig godt	I meget høj grad	Ja en gang imellem til fester	Ja - Fødevarer, jordbrug og oplevelser		Aarhus tech	0	0	0	1	0				15-25 minutter	17
Mand	16	20	0	1	0	0	0	0		I høj grad	I høj grad	I nogen grad	I høj grad	I mindre grad	I nogen grad	Slet ikke	Slet ikke	I høj grad	I nogen grad	I mindre grad	I nogen grad	I høj grad	Middel	Dårlige	Gode	Middel	Gode	Nej	Læser, ser fjernsyn eller har anden stillesiddende beskæftigelse	Nogenlunde	Ja	Jeg klarer mig godt	I høj grad	Nej	Ja - Fødevarer, jordbrug og oplevelser		Aarhus tech	0	0	0	1	0				15-25 minutter	16
Kvinde	17	20	1	1	0	0	0	0		I høj grad	Ved ikke	I nogen grad	I høj grad	Ved ikke	Ved ikke	Slet ikke	Slet ikke	I høj grad	I høj grad	I nogen grad	I mindre grad	I høj grad	Middel	Gode	Ved ikke	Ved ikke	Ved ikke	Måske	Spadserer, cykler eller har anden lettere motion mindst 4 timer om ugen (medregn også cykling/gang til skole)	Nogenlunde	Ja	Ved ikke	I høj grad	Nej	Ja - Omsorg, sundhed og pædagogik		Sosufyn	0	0	0	1	0				15-25 minutter	17
Mand	16	20	0	0	0	0	0	1	Nogle gang i teroi	I meget høj grad	I meget høj grad	I meget høj grad	I meget høj grad	I mindre grad	I meget høj grad	Slet ikke	Slet ikke	I meget høj grad	I meget høj grad	I meget høj grad	I meget høj grad	I høj grad	Meget gode	Meget dårlige	Meget gode	Meget dårlige	Meget gode	Ja	Dyrker motionsidræt, løber eller lignende mindst 4 timer om ugen	God	Ja	Jeg klarer mig meget godt	I meget høj grad	Nej	Ja - Fødevarer, jordbrug og oplevelser		Aarhus tec	0	0	0	1	0				15-25 minutter	16
Mand	17	10	1	1	0	0	0	0		I nogen grad	I nogen grad	I nogen grad	I meget høj grad	Ved ikke	I meget høj grad	Slet ikke	I nogen grad	I nogen grad	I nogen grad	I nogen grad	I nogen grad	I nogen grad	Meget gode	Gode	Ved ikke	Ved ikke	Gode	Nej	Træner hårdt og dyrker konkurrenceidræt regelmæssigt og flere gange om ugen	Nogenlunde	Ved ikke	Jeg klarer mig meget godt	I høj grad	Nej	Ja - Fødevarer, jordbrug og oplevelser		Århusb Tech	0	0	0	1	0				0-10 minutter	17
Mand	18	over 60	0	0	0	0	1	0		I meget høj grad	Slet ikke	I meget høj grad	I meget høj grad	I høj grad	I meget høj grad	Slet ikke	Slet ikke	I meget høj grad	I nogen grad	I nogen grad	Slet ikke	I nogen grad	Middel	Middel	Middel	Middel	Dårlige	Måske	Træner hårdt og dyrker konkurrenceidræt regelmæssigt og flere gange om ugen	God	Ved ikke	Jeg klarer mig middelt	Slet ikke	Nej	Ja - Teknologi, byggeri og transport.		Euc	0	0	0	1	0				45 - over 60 min	18
Mand	16	20	0	0	1	0	0	0		I nogen grad	I nogen grad	I nogen grad	I høj grad	Slet ikke	I høj grad	Slet ikke	Slet ikke	I høj grad	I nogen grad	I mindre grad	I nogen grad	I nogen grad	Gode	Middel	Gode	Middel	Dårlige	Nej	Træner hårdt og dyrker konkurrenceidræt regelmæssigt og flere gange om ugen	Virkelig god	Ja	Jeg klarer mig godt	I høj grad	Nej	Ja - Teknologi, byggeri og transport.		Skive teknisk skole	0	0	0	1	0				15-25 minutter	16
			0	0	0	0	0	0																														0	1	0	0	0
Kvinde	17	10	0	1	0	0	0	0		I meget høj grad	I meget høj grad	I meget høj grad	I meget høj grad	I meget høj grad	I meget høj grad	Slet ikke	I meget høj grad	I meget høj grad	I nogen grad	I høj grad	I høj grad	Slet ikke	Middel	Gode	Middel	Dårlige	Ved ikke	Nej	Spadserer, cykler eller har anden lettere motion mindst 4 timer om ugen (medregn også cykling/gang til skole)	Mindre god	Ja	Jeg klarer mig meget godt	I høj grad	ja, 1-5 cigaretter om dagen	Ja - Omsorg, sundhed og pædagogik		Sosu Esbjerg	0	0	0	1	0				0-10 minutter	17
			0	0	0	0	0	0																														0	1	0	0	0
Kvinde	17	5	0	0	1	0	0	0		Ved ikke	Ved ikke	Ved ikke	Ved ikke	Ved ikke	Ved ikke	Ved ikke	Ved ikke	Ved ikke	I meget høj grad	Ved ikke	I meget høj grad	Ved ikke	Ved ikke	Ved ikke	Ved ikke	Ved ikke	Ved ikke	Nej	Spadserer, cykler eller har anden lettere motion mindst 4 timer om ugen (medregn også cykling/gang til skole)	Nogenlunde	Ved ikke	Jeg klarer mig godt	I høj grad	Nej	Ja - Omsorg, sundhed og pædagogik		SOSO Vejle	0	0	0	1	0				0-10 minutter	17
Kvinde	18	over 60	0	0	0	0	1	0		Slet ikke	I mindre grad	Slet ikke	I mindre grad	Slet ikke	I høj grad	I mindre grad	I mindre grad	Slet ikke	Slet ikke	I høj grad	I meget høj grad	I nogen grad	Meget gode	Meget gode	Meget gode	Dårlige	Gode	Nej	Spadserer, cykler eller har anden lettere motion mindst 4 timer om ugen (medregn også cykling/gang til skole)	Mindre god	Ja	Jeg klarer mig meget godt	I høj grad	Ja, mere en 11 cigaretter om dagen	Ja - Omsorg, sundhed og pædagogik		Sosu vejle	0	0	0	1	0				45 - over 60 min	18
Kvinde	19	30	0	0	0	0	1	0		I meget høj grad	I meget høj grad	I høj grad	I høj grad	I meget høj grad	I meget høj grad	Slet ikke	Slet ikke	I meget høj grad	I høj grad	I høj grad	I høj grad	I høj grad	Middel	Gode	Ved ikke	Ved ikke	Ved ikke	Ved ikke	Træner hårdt og dyrker konkurrenceidræt regelmæssigt og flere gange om ugen	God	Ja	Jeg klarer mig godt	I høj grad	Nej	Ja - Omsorg, sundhed og pædagogik		SOSU Esbjerg	0	0	0	1	0				30-40 minutter	19
Kvinde	15	5	0	0	1	0	0	0		I høj grad	I høj grad	I nogen grad	I høj grad	I mindre grad	I mindre grad	Slet ikke	Slet ikke	I høj grad	Ved ikke	Ved ikke	Ved ikke	Ved ikke	Ved ikke	Ved ikke	Ved ikke	Ved ikke	Ved ikke	Nej	Dyrker motionsidræt, løber eller lignende mindst 4 timer om ugen	Mindre god	Ja	Jeg klarer mig middelt	Ved ikke	Nej	Ja - Omsorg, sundhed og pædagogik		SOSU Vejle	0	0	0	1	0				0-10 minutter	15
Mand	18	40	0	0	1	0	0	0		I mindre grad	I nogen grad	I høj grad	I nogen grad	I nogen grad	I meget høj grad	I meget høj grad	I høj grad	I høj grad	I nogen grad	I høj grad	I høj grad	I nogen grad	Meget gode	Meget gode	Meget gode	Meget gode	Meget gode	Ved ikke	Dyrker motionsidræt, løber eller lignende mindst 4 timer om ugen	Nogenlunde	Ja	Jeg klarer mig godt	I høj grad	Ja, mere en 11 cigaretter om dagen	Ja - Omsorg, sundhed og pædagogik		EUC NVS	0	0	0	1	0				30-40 minutter	18
Kvinde	17	10	0	0	1	1	0	1	Til tider i undervisningen.	I høj grad	I mindre grad	I nogen grad	I nogen grad	I mindre grad	Slet ikke	I nogen grad	I nogen grad	I meget høj grad	I høj grad	I nogen grad	I meget høj grad	I nogen grad	Middel	Middel	Middel	Middel	Middel	Nej	Dyrker motionsidræt, løber eller lignende mindst 4 timer om ugen	God	Ved ikke	Jeg klarer mig meget godt	I høj grad	Nej	Ja - Omsorg, sundhed og pædagogik		Vejle	0	0	0	1	0				0-10 minutter	17
			0	0	0	0	0	0																														0	1	0	0	0
Mand	17	15	0	0	0	0	0	1	idræts dagende vi har haft	I mindre grad	Slet ikke	Slet ikke	Slet ikke	Slet ikke	I mindre grad	I mindre grad	I mindre grad	I nogen grad	I mindre grad	I høj grad	I høj grad	I nogen grad	Middel	Gode	Gode	Gode	Middel	Ja	Læser, ser fjernsyn eller har anden stillesiddende beskæftigelse	Mindre god	Ved ikke	Jeg klarer mig godt	I nogen grad	Nej	Ja - Teknologi, byggeri og transport.		aarhus tech	0	0	0	1	0				15-25 minutter	17
			0	0	0	0	0	0																														0	1	0	0	0
Mand	17	45	0	1	0	1	0	0		I høj grad	I meget høj grad	I meget høj grad	I meget høj grad	I meget høj grad	I meget høj grad	Ved ikke	Ved ikke	I meget høj grad	I nogen grad	I nogen grad	I nogen grad	I nogen grad	Gode	Gode	Ved ikke	Ved ikke	Gode	Ved ikke	Læser, ser fjernsyn eller har anden stillesiddende beskæftigelse									0	0	1	0	0				45 - over 60 min	17
			0	0	0	0	0	0																														0	1	0	0	0
Mand	17	45	0	0	0	0	0	1	ca heletiden	I nogen grad	I høj grad	I høj grad	I meget høj grad	I meget høj grad	I meget høj grad	Ved ikke	Ved ikke	I høj grad	I høj grad	I nogen grad	I høj grad	I meget høj grad	Gode	Middel	Gode	Gode	Meget dårlige	Ved ikke	Spadserer, cykler eller har anden lettere motion mindst 4 timer om ugen (medregn også cykling/gang til skole)	God	Ja	Jeg klarer mig meget godt	I meget høj grad	ja, 1-5 cigaretter om dagen	Ja - Teknologi, byggeri og transport.		eucnvs	0	0	0	1	0				45 - over 60 min	17
Kvinde	17	15	0	1	0	0	0	0		I meget høj grad	I høj grad	I meget høj grad	I meget høj grad	I mindre grad	I nogen grad	Slet ikke	Slet ikke	I meget høj grad	I høj grad	I nogen grad	I meget høj grad	I nogen grad	Meget gode	Meget gode	Meget gode	Meget gode	Ved ikke	Måske	Læser, ser fjernsyn eller har anden stillesiddende beskæftigelse	Dårlig	Ved ikke	Jeg klarer mig middelt	I høj grad	Ja en gang imellem til fester	Ja - Omsorg, sundhed og pædagogik		Odense	0	0	0	1	0				15-25 minutter	17
			0	0	0	0	0	0																														0	1	0	0	0
Mand	16	20	1	0	1	1	0	0		I nogen grad	I nogen grad	I nogen grad	I nogen grad	I nogen grad	I nogen grad	I nogen grad	I nogen grad	I nogen grad	I nogen grad	I høj grad	I meget høj grad	Slet ikke	Meget gode	Meget gode	Meget gode	Ved ikke	Ved ikke	Nej	Læser, ser fjernsyn eller har anden stillesiddende beskæftigelse	Nogenlunde	Nej	Jeg klarer mig godt	I høj grad	Nej	Ja - Teknologi, byggeri og transport.		Skivetekniskeskole	0	0	0	1	0				15-25 minutter	16
Mand	16	30	1	0	0	0	0	0		I høj grad	I høj grad	I høj grad	I høj grad	I nogen grad	I høj grad	I nogen grad	I nogen grad	I høj grad	I nogen grad	I nogen grad	I nogen grad	I nogen grad	Dårlige	Middel	Dårlige	Middel	Dårlige	Måske	Dyrker motionsidræt, løber eller lignende mindst 4 timer om ugen	God								0	0	1	0	0				30-40 minutter	16
Kvinde	17	20	1	1	1	0	0	0		I høj grad	I høj grad	I høj grad	I høj grad	I høj grad	I nogen grad	I mindre grad	I nogen grad	I høj grad	I nogen grad	I høj grad	I høj grad	I høj grad	Gode	Gode	Middel	Gode	Gode	Måske	Læser, ser fjernsyn eller har anden stillesiddende beskæftigelse	Mindre god	Ja	Jeg klarer mig godt	I meget høj grad	Nej	Ja - Omsorg, sundhed og pædagogik		Tech College	0	0	0	1	0				15-25 minutter	17
Mand	17	over 60	0	0	0	1	0	0		I nogen grad	I høj grad	I nogen grad	I høj grad	I mindre grad	I nogen grad	Slet ikke	I mindre grad	I høj grad	Slet ikke	Slet ikke	I nogen grad	I nogen grad	Middel	Middel	Middel	Ved ikke	Ved ikke	Nej	Spadserer, cykler eller har anden lettere motion mindst 4 timer om ugen (medregn også cykling/gang til skole)	Nogenlunde	Ja	Jeg klarer mig godt	I høj grad	Ja en gang imellem til fester	Ja - Teknologi, byggeri og transport.		Aarhus tech	0	0	0	1	0				45 - over 60 min	17
Mand	16	10	0	0	0	1	0	0		Ved ikke	Slet ikke	Slet ikke	Ved ikke	Ved ikke	Slet ikke	Ved ikke	Ved ikke	Ved ikke	Ved ikke	Ved ikke	Ved ikke	Ved ikke	Middel	Middel	Middel	Middel	Meget dårlige	Måske	Træner hårdt og dyrker konkurrenceidræt regelmæssigt og flere gange om ugen	God	Ved ikke	Jeg klarer mig godt	I høj grad	Nej	Ja - Teknologi, byggeri og transport.		Euc syd	0	0	0	1	0				0-10 minutter	16
Mand	19	10	0	0	0	0	1	0		I meget høj grad	I meget høj grad	I meget høj grad	I meget høj grad	I meget høj grad	I meget høj grad	I meget høj grad	I meget høj grad	I meget høj grad	I meget høj grad	I meget høj grad	I meget høj grad	I meget høj grad	Meget gode	Meget gode	Meget gode	Meget gode	Meget gode	Nej	Træner hårdt og dyrker konkurrenceidræt regelmæssigt og flere gange om ugen	God	Nej	Jeg klarer mig meget godt	I meget høj grad	ja, 1-5 cigaretter om dagen	Ja - Teknologi, byggeri og transport.		euc nord	0	0	0	1	0				0-10 minutter	19
Mand	16	0	0	0	0	0	1	0																														0	0	1	0	0				0-10 minutter	16
Mand	17	0	1	0	0	0	0	0		I nogen grad	I nogen grad	I nogen grad	I nogen grad	I nogen grad	I nogen grad	Slet ikke	Slet ikke	I nogen grad	I nogen grad	I nogen grad	I nogen grad	I nogen grad	Gode	Ved ikke	Gode	Ved ikke	Ved ikke	Nej	Spadserer, cykler eller har anden lettere motion mindst 4 timer om ugen (medregn også cykling/gang til skole)	Mindre god	Ja	Jeg klarer mig middelt	I høj grad	Nej	Ja - Teknologi, byggeri og transport.		Sønderborg	0	0	0	1	0				0-10 minutter	17
Kvinde	17	0	0	0	1	1	1	0																														0	0	1	0	0				0-10 minutter	17
Mand	16	10	0	1	0	0	0	0		Slet ikke	I høj grad	I høj grad	Slet ikke	Slet ikke	Slet ikke	Slet ikke	Slet ikke	I høj grad	Ved ikke	Ved ikke	Slet ikke	Ved ikke	Ved ikke	Gode	Ved ikke	Meget dårlige	Meget dårlige	Ved ikke	Læser, ser fjernsyn eller har anden stillesiddende beskæftigelse	Dårlig	Ved ikke	Ved ikke	I høj grad	Nej	Ja - Fødevarer, jordbrug og oplevelser		celf nyk.f	0	0	0	1	0				0-10 minutter	16
Mand	17	5	0	0	0	1	0	0		I mindre grad	Slet ikke	Slet ikke	Ved ikke	Slet ikke	I nogen grad	Ved ikke	I mindre grad	I mindre grad	I mindre grad	I nogen grad	I høj grad	I mindre grad	Dårlige	Gode	Middel	Meget dårlige	Meget dårlige	Ja	Spadserer, cykler eller har anden lettere motion mindst 4 timer om ugen (medregn også cykling/gang til skole)	Mindre god	Ja	Jeg klarer mig godt	I høj grad	Ja, mere en 11 cigaretter om dagen	Ja - Teknologi, byggeri og transport.		EUC Nordvestsjælland	0	0	0	1	0				0-10 minutter	17
Mand	16	10	1	0	0	0	0	0		Ved ikke	Slet ikke	Slet ikke	Slet ikke	Slet ikke	I mindre grad	Slet ikke	I mindre grad	I nogen grad	I mindre grad	Ved ikke	Slet ikke	I nogen grad	Meget gode	Meget dårlige	Middel	Ved ikke	Meget dårlige	Nej	Spadserer, cykler eller har anden lettere motion mindst 4 timer om ugen (medregn også cykling/gang til skole)	God	Nej	Jeg klarer mig middelt	I nogen grad	Nej	Ja - Teknologi, byggeri og transport.		EUC Syd Sønderborg	0	0	0	1	0				0-10 minutter	16
Kvinde	17	15	0	1	0	0	0	0		I nogen grad	I mindre grad	I nogen grad	I nogen grad	Slet ikke	I nogen grad	I nogen grad	I meget høj grad	I nogen grad	I høj grad	I høj grad	I meget høj grad	I høj grad	Gode	Gode	Gode	Middel	Middel	Ja	Spadserer, cykler eller har anden lettere motion mindst 4 timer om ugen (medregn også cykling/gang til skole)	Mindre god	Nej	Jeg klarer mig middelt	I nogen grad	Ja en gang imellem til fester	Ja - Fødevarer, jordbrug og oplevelser		Aarhus Tech	0	0	0	1	0				15-25 minutter	17
			0	0	0	0	0	0																														0	1	0	0	0
Kvinde	17	0	0	1	0	0	0	0		Ved ikke	Ved ikke	Ved ikke	Ved ikke	Ved ikke	Ved ikke	Ved ikke	Ved ikke	Ved ikke	Ved ikke	Ved ikke	Ved ikke	Ved ikke	Ved ikke	Ved ikke	Ved ikke	Ved ikke	Ved ikke	Ved ikke	Læser, ser fjernsyn eller har anden stillesiddende beskæftigelse	Nogenlunde	Ved ikke	Jeg klarer mig godt	I høj grad	Nej	Ja - Omsorg, sundhed og pædagogik		Tech college	0	0	0	1	0				0-10 minutter	17
			0	0	0	0	0	0																														0	1	0	0	0
Mand	17	10	0	1	0	1	0	0		I nogen grad	I nogen grad	I mindre grad	I nogen grad	Slet ikke	Ved ikke	I mindre grad	I nogen grad	I nogen grad	I nogen grad	I nogen grad	I mindre grad	I nogen grad	Middel	Gode	Gode	Meget dårlige	Meget dårlige	Nej	Læser, ser fjernsyn eller har anden stillesiddende beskæftigelse	Mindre god	Ved ikke	Jeg klarer mig godt	I nogen grad	Nej	Ja - Fødevarer, jordbrug og oplevelser		CELF Nykøbing F	0	0	0	1	0				0-10 minutter	17
Kvinde	18	0	1	0	0	1	0	0		I nogen grad	I nogen grad	I nogen grad	Slet ikke	I høj grad	I høj grad	I nogen grad	I nogen grad	I mindre grad	I mindre grad	I nogen grad	I meget høj grad	I høj grad	Dårlige	Dårlige	Dårlige	Dårlige	Dårlige	Ja	Spadserer, cykler eller har anden lettere motion mindst 4 timer om ugen (medregn også cykling/gang til skole)	God	Ja	Jeg klarer mig meget godt	I meget høj grad	Ja, mere en 11 cigaretter om dagen	Ja - Omsorg, sundhed og pædagogik		århus tech	0	0	0	1	0				0-10 minutter	18
			0	0	0	0	0	0																														0	1	0	0	0
Kvinde	16	over 60	1	1	1	0	0	0		I høj grad	I høj grad	I høj grad	I høj grad	I nogen grad	I høj grad	I høj grad	I høj grad	I høj grad	I høj grad	I høj grad	I høj grad	I høj grad	Meget gode	Meget gode	Meget gode	Gode	Gode	Nej	Dyrker motionsidræt, løber eller lignende mindst 4 timer om ugen	God	Ja	Jeg klarer mig godt	I nogen grad	Ja en gang imellem til fester	Ja - Omsorg, sundhed og pædagogik		EUC	0	0	0	1	0				45 - over 60 min	16
Mand	18	40	0	1	0	0	0	0		Ved ikke	Ved ikke	Ved ikke	Ved ikke	Ved ikke	Ved ikke	Ved ikke	Ved ikke	Ved ikke	I meget høj grad	I meget høj grad	I meget høj grad	I meget høj grad	Meget gode	Meget gode	Meget gode	Meget gode	Ved ikke	Måske	Dyrker motionsidræt, løber eller lignende mindst 4 timer om ugen	Nogenlunde	Ved ikke	Jeg klarer mig middelt	I meget høj grad	Ja en gang imellem til fester	Ja - Teknologi, byggeri og transport.		Euc	0	0	0	1	0				30-40 minutter	18
			0	0	0	0	0	0																														0	1	0	0	0
Kvinde	17	45	1	1	1	1	1	1	Bevægelse inden pause i 15 min	I høj grad	I høj grad	I høj grad	I meget høj grad	I høj grad	I høj grad	I nogen grad	I høj grad	I høj grad	I nogen grad	I nogen grad	I nogen grad	I høj grad	Gode	Gode	Middel	Ved ikke	Meget dårlige	Måske	Spadserer, cykler eller har anden lettere motion mindst 4 timer om ugen (medregn også cykling/gang til skole)	Nogenlunde	Ja	Jeg klarer mig godt	I meget høj grad	Ja, mere en 11 cigaretter om dagen	Ja - Omsorg, sundhed og pædagogik		Tech College	0	0	0	1	0				45 - over 60 min	17
Kvinde	16	15	0	0	1	0	1	0		I meget høj grad	I høj grad	I høj grad	I meget høj grad	I nogen grad	I høj grad	Slet ikke	Slet ikke	I meget høj grad	I nogen grad	I høj grad	I nogen grad	I høj grad	Gode	Gode	Meget gode	Meget gode	Gode	Nej	Spadserer, cykler eller har anden lettere motion mindst 4 timer om ugen (medregn også cykling/gang til skole)	Nogenlunde	Ja	Jeg klarer mig godt	I høj grad	Ja en gang imellem til fester	Ja - Omsorg, sundhed og pædagogik		SOSU Fredericia- Vejle- Horsens	0	0	0	1	0				15-25 minutter	16
			0	0	0	0	0	0																														0	1	0	0	0
Mand	19	30	1	0	0	0	0	0		Slet ikke	Slet ikke	Slet ikke	Slet ikke	Slet ikke	Slet ikke	I meget høj grad	I meget høj grad	Slet ikke	I meget høj grad	I meget høj grad	I nogen grad	I nogen grad	Middel	Dårlige	Middel	Dårlige	Meget dårlige	Ja	Dyrker motionsidræt, løber eller lignende mindst 4 timer om ugen	Mindre god	Ja	Jeg klarer mig ikke så godt	I nogen grad	Ja en gang imellem til fester	Ja - Teknologi, byggeri og transport.		Aarhus tech	0	0	0	1	0				30-40 minutter	19
Mand	17	30	1	1	0	0	0	0		I høj grad	I mindre grad	I nogen grad	I nogen grad	I nogen grad	I høj grad	I høj grad	I nogen grad	I mindre grad	I nogen grad	I høj grad	I høj grad	I høj grad	Meget gode	Gode	Gode	Ved ikke	Ved ikke	Måske	Læser, ser fjernsyn eller har anden stillesiddende beskæftigelse	Nogenlunde	Ja	Jeg klarer mig godt	I høj grad	ja, 6-10 cigaretter om dagen	Ja - Teknologi, byggeri og transport.		EUC Sønderborg	0	0	0	1	0				30-40 minutter	17
Mand	17	5	0	0	1	0	0	0		I meget høj grad	I meget høj grad	I meget høj grad	I høj grad	Slet ikke	I nogen grad	Slet ikke	I høj grad	I meget høj grad	I nogen grad	I nogen grad	I nogen grad	I nogen grad	Dårlige	Middel	Meget dårlige	Dårlige	Meget dårlige	Måske	Træner hårdt og dyrker konkurrenceidræt regelmæssigt og flere gange om ugen	Virkelig god	Ja	Jeg klarer mig meget godt	I høj grad	Nej	Ja - Teknologi, byggeri og transport.		EUC Nord	0	0	0	1	0				0-10 minutter	17
Kvinde	18	20	0	1	0	1	0	0		I nogen grad	Slet ikke	I mindre grad	I nogen grad	I mindre grad	Slet ikke	I mindre grad	I mindre grad	I nogen grad	I høj grad	I høj grad	I høj grad	I høj grad	Dårlige	Dårlige	Dårlige	Dårlige	Dårlige	Ja	Spadserer, cykler eller har anden lettere motion mindst 4 timer om ugen (medregn også cykling/gang til skole)	Nogenlunde	Ja	Jeg klarer mig middelt	I nogen grad	ja, 1-5 cigaretter om dagen	Nej - jeg ved ikke hvilket hovedområde, jeg er tilknyttet (skriv gerne hvad din uddannelse hedder)	Aalborg Tech	Aalborg Tech	0	0	0	1	0				15-25 minutter	18
Mand	17	15	1	0	0	0	0	0		I nogen grad	I mindre grad	I mindre grad	I nogen grad	Slet ikke	Ved ikke	Ved ikke	I mindre grad	I mindre grad	I høj grad	I høj grad	I høj grad	I høj grad	Meget dårlige	Middel	Middel	Meget dårlige	Middel	Måske	Spadserer, cykler eller har anden lettere motion mindst 4 timer om ugen (medregn også cykling/gang til skole)	Nogenlunde	Ja	Jeg klarer mig middelt	I høj grad	Nej	Ja - Teknologi, byggeri og transport.		EUC Sønderborg	0	0	0	1	0				15-25 minutter	17
Kvinde	18	15	0	1	0	0	0	1	Ung i Danmark	I meget høj grad	I meget høj grad	I nogen grad	I meget høj grad	I høj grad	I høj grad	Slet ikke	Slet ikke	I meget høj grad	I høj grad	I høj grad	I meget høj grad	I meget høj grad	Middel	Gode	Gode	Ved ikke	Gode	Nej	Spadserer, cykler eller har anden lettere motion mindst 4 timer om ugen (medregn også cykling/gang til skole)	Nogenlunde	Ja	Jeg klarer mig meget godt	I meget høj grad	Nej	Ja - Fødevarer, jordbrug og oplevelser		Nykøbing F	0	0	0	1	0				15-25 minutter	18
Kvinde	17	10	0	1	0	0	0	0		I mindre grad	I nogen grad	I høj grad	I høj grad	I høj grad	I nogen grad	I mindre grad	I høj grad	I nogen grad	I nogen grad	I nogen grad	I nogen grad	I nogen grad	Meget gode	Dårlige	Dårlige	Ved ikke	Ved ikke	Nej	Dyrker motionsidræt, løber eller lignende mindst 4 timer om ugen	God	Ja	Jeg klarer mig godt	I meget høj grad	Ja en gang imellem til fester	Nej - jeg ved ikke hvilket hovedområde, jeg er tilknyttet (skriv gerne hvad din uddannelse hedder)	Alborg tech	Alborg tech	0	0	0	1	0				0-10 minutter	17
Kvinde	12	0	0	0	0	0	0	1	Aldrig kun når jeg bliver misbrugt på toilettet	Ved ikke	Ved ikke	Ved ikke	Ved ikke	Ved ikke	Ved ikke	Ved ikke	Ved ikke	Ved ikke	Ved ikke	Ved ikke	Ved ikke	Ved ikke	Ved ikke	Ved ikke	Ved ikke	Ved ikke	Ved ikke	Ved ikke	Læser, ser fjernsyn eller har anden stillesiddende beskæftigelse	Virkelig god	Ved ikke	Ved ikke	Ved ikke	Ja, mere en 11 cigaretter om dagen	Nej - jeg ved ikke hvilket hovedområde, jeg er tilknyttet (skriv gerne hvad din uddannelse hedder)	ved det ikke	EUC	0	0	0	1	0				0-10 minutter
Mand	17	10	1	0	0	1	1	0		Slet ikke	I høj grad	I nogen grad	I meget høj grad	Slet ikke	Slet ikke	I nogen grad	I nogen grad	I mindre grad	Slet ikke	Slet ikke	Slet ikke	Slet ikke	Meget dårlige	Dårlige	Dårlige	Meget dårlige	Dårlige	Måske	Spadserer, cykler eller har anden lettere motion mindst 4 timer om ugen (medregn også cykling/gang til skole)	Nogenlunde	Nej	Jeg klarer mig godt	I høj grad	ja, 1-5 cigaretter om dagen	Ja - Teknologi, byggeri og transport.		frede	0	0	0	1	0				0-10 minutter	17
Kvinde	17	20	0	0	1	1	1	0		I høj grad	I mindre grad	I mindre grad	I nogen grad	I nogen grad	I nogen grad	Slet ikke	I mindre grad	I mindre grad	I nogen grad	I nogen grad	I nogen grad	I nogen grad	Gode	Middel	Middel	Middel	Middel	Nej	Træner hårdt og dyrker konkurrenceidræt regelmæssigt og flere gange om ugen	God	Ja	Jeg klarer mig godt	I høj grad	Nej	Ja - Omsorg, sundhed og pædagogik		Sosu Vejle	0	0	0	1	0				15-25 minutter	17
Mand	16	10	0	1	0	0	1	0		I høj grad	Slet ikke	Slet ikke	Slet ikke	Slet ikke	Slet ikke	I meget høj grad	I meget høj grad	I mindre grad	I høj grad	I høj grad	Slet ikke	Slet ikke	Meget dårlige	Meget gode	Meget gode	Meget dårlige	Meget dårlige	Nej	Træner hårdt og dyrker konkurrenceidræt regelmæssigt og flere gange om ugen	Dårlig	Nej	Jeg klarer mig meget godt	I nogen grad	Nej	Ja - Teknologi, byggeri og transport.		Mercantec Viborg	0	0	0	1	0				0-10 minutter	16
Kvinde	19	25	0	0	1	1	0	0		I meget høj grad	I meget høj grad	I nogen grad	I meget høj grad	I meget høj grad	I meget høj grad	I mindre grad	Ved ikke	I nogen grad	I meget høj grad	I meget høj grad	I meget høj grad	I nogen grad	Middel	Meget gode	Meget gode	Meget gode	Meget gode	Ja	Spadserer, cykler eller har anden lettere motion mindst 4 timer om ugen (medregn også cykling/gang til skole)	God	Ved ikke	Jeg klarer mig meget godt	I meget høj grad	Nej	Ja - Omsorg, sundhed og pædagogik		SOSU vejle	0	0	0	1	0				15-25 minutter	19
Mand	16	5	0	0	0	0	1	0		I nogen grad	I høj grad	I mindre grad	I nogen grad	Slet ikke	I nogen grad	I mindre grad	I nogen grad	I høj grad	I høj grad	I meget høj grad	I meget høj grad	I høj grad	Gode	Meget dårlige	Meget dårlige	Meget dårlige	Middel	Nej	Læser, ser fjernsyn eller har anden stillesiddende beskæftigelse	Mindre god	Ja	Jeg klarer mig middelt	I høj grad	Nej	Ja - Teknologi, byggeri og transport.		Aarhus tech	0	0	0	1	0				0-10 minutter	16
			0	0	0	0	0	0																														0	1	0	0	0
Mand	17	30	0	0	0	0	1	0		I høj grad	I høj grad	I nogen grad	I høj grad	Slet ikke	I høj grad	Slet ikke	I nogen grad	I nogen grad	I nogen grad	I nogen grad	I nogen grad	I nogen grad	Meget dårlige	Meget dårlige	Meget dårlige	Meget dårlige	Meget dårlige	Måske	Træner hårdt og dyrker konkurrenceidræt regelmæssigt og flere gange om ugen	God	Ja	Jeg klarer mig godt	Slet ikke	Nej	Ja - Teknologi, byggeri og transport.		frederikshavn	0	0	0	1	0				30-40 minutter	17
Mand	18	5	0	0	0	1	0	0		Ved ikke	Ved ikke	I nogen grad	I nogen grad	Ved ikke	I mindre grad	Ved ikke	Slet ikke	Ved ikke	Ved ikke	Slet ikke	I nogen grad	Ved ikke	Middel	Ved ikke	Ved ikke	Ved ikke	Ved ikke	Ved ikke	Læser, ser fjernsyn eller har anden stillesiddende beskæftigelse	Nogenlunde	Ved ikke	Jeg klarer mig middelt	I høj grad	ja, 6-10 cigaretter om dagen	Ja - Teknologi, byggeri og transport.		EUC	0	0	0	1	0				0-10 minutter	18
Mand	18	0	0	0	0	1	0	0		Ved ikke	Ved ikke	Ved ikke	Ved ikke	Ved ikke	I høj grad	Ved ikke	Ved ikke	I mindre grad	Ved ikke	Ved ikke	Ved ikke	Ved ikke	Ved ikke	Ved ikke	Ved ikke	Ved ikke	Ved ikke	Ved ikke	Spadserer, cykler eller har anden lettere motion mindst 4 timer om ugen (medregn også cykling/gang til skole)	Nogenlunde	Ved ikke	Jeg klarer mig middelt	I meget høj grad	Nej	Ja - Teknologi, byggeri og transport.		Aarhus Tech	0	0	0	1	0				0-10 minutter	18
Mand	18	5	1	0	0	0	0	1	Idrætsdag	I nogen grad	Ved ikke	Ved ikke	I nogen grad	Ved ikke	I høj grad	Ved ikke	Ved ikke	I nogen grad	Ved ikke	Slet ikke	I nogen grad	Slet ikke	Gode	Gode	Middel	Ved ikke	Ved ikke	Måske	Dyrker motionsidræt, løber eller lignende mindst 4 timer om ugen	God	Ved ikke	Jeg klarer mig middelt	I nogen grad	Ja en gang imellem til fester	Ja - Teknologi, byggeri og transport.		Aarhus tech	0	0	0	1	0				0-10 minutter	18
Kvinde	17	over 60	0	0	1	0	0	0		I nogen grad	Slet ikke	Ved ikke	Ved ikke	Slet ikke	I nogen grad	I mindre grad	I meget høj grad	I mindre grad	I høj grad	I høj grad	I høj grad	I meget høj grad	Middel	Ved ikke	Ved ikke	Ved ikke	Middel	Nej	Læser, ser fjernsyn eller har anden stillesiddende beskæftigelse	Nogenlunde	Nej	Jeg klarer mig meget godt	I høj grad	ja, 6-10 cigaretter om dagen	Ja - Fødevarer, jordbrug og oplevelser		Tech college	0	0	0	1	0				45 - over 60 min	17
Mand	18	30	0	1	0	0	0	0		I høj grad	I høj grad	I høj grad	I høj grad	I høj grad	I høj grad	I høj grad	I mindre grad	I høj grad	I mindre grad	I høj grad	I høj grad	I høj grad	Dårlige	Dårlige	Dårlige	Dårlige	Dårlige	Nej	Træner hårdt og dyrker konkurrenceidræt regelmæssigt og flere gange om ugen	God	Ja	Jeg klarer mig meget godt	I meget høj grad	Nej	Ja - Omsorg, sundhed og pædagogik		1	0	0	0	1	0				30-40 minutter	18
Kvinde	17	5	0	1	0	0	0	1	Men sjældent	I meget høj grad	I høj grad	I høj grad	I meget høj grad	I nogen grad	I nogen grad	I nogen grad	I meget høj grad	I meget høj grad	I mindre grad	I meget høj grad	Slet ikke	I høj grad	Meget gode	Gode	Gode	Middel	Middel	Nej	Læser, ser fjernsyn eller har anden stillesiddende beskæftigelse	Mindre god	Ja	Jeg klarer mig godt	I høj grad	Nej	Ja - Omsorg, sundhed og pædagogik		Sosu Esbjerg	0	0	0	1	0				0-10 minutter	17
Kvinde	19	45	0	0	1	0	0	0		I mindre grad	Slet ikke	Ved ikke	I nogen grad	Slet ikke	I meget høj grad	I mindre grad	I meget høj grad	Slet ikke	I høj grad	I meget høj grad	I meget høj grad	I meget høj grad	Gode	Gode	Gode	Middel	Ved ikke	Ja	Træner hårdt og dyrker konkurrenceidræt regelmæssigt og flere gange om ugen	Virkelig god	Ved ikke	Jeg klarer mig godt	I meget høj grad	Nej	Ja - Omsorg, sundhed og pædagogik		Tech	0	0	0	1	0				45 - over 60 min	19
Mand	16	10	0	1	0	0	0	0		I høj grad	I høj grad	I nogen grad	I meget høj grad	Slet ikke	I nogen grad	Slet ikke	Ved ikke	I nogen grad	I nogen grad	I nogen grad	I høj grad	I mindre grad	Dårlige	Gode	Middel	Dårlige	Ved ikke	Ved ikke	Spadserer, cykler eller har anden lettere motion mindst 4 timer om ugen (medregn også cykling/gang til skole)	Mindre god	Ved ikke	Jeg klarer mig godt	I nogen grad	Ja, mere en 11 cigaretter om dagen	Ja - Teknologi, byggeri og transport.		EUC NORD frederikshavn	0	0	0	1	0				0-10 minutter	16
Kvinde	17	35	0	1	0	1	0	0		I nogen grad	I nogen grad	I mindre grad	I høj grad	I nogen grad	I høj grad	I mindre grad	I mindre grad	I nogen grad	I høj grad	I nogen grad	I meget høj grad	I nogen grad	Gode	Gode	Gode	Ved ikke	Ved ikke	Nej	Spadserer, cykler eller har anden lettere motion mindst 4 timer om ugen (medregn også cykling/gang til skole)	Nogenlunde	Ja	Jeg klarer mig meget godt	I meget høj grad	Nej	Ja - Omsorg, sundhed og pædagogik		Aarhus Tech, trends og medie	0	0	0	1	0				30-40 minutter	17
Kvinde	17	5	0	0	1	0	0	0		I mindre grad	I mindre grad	Ved ikke	Ved ikke	I mindre grad	I høj grad	Ved ikke	Ved ikke	I nogen grad	Ved ikke	Ved ikke	Ved ikke	Ved ikke	Ved ikke	Ved ikke	Ved ikke	Ved ikke	Ved ikke	Nej	Spadserer, cykler eller har anden lettere motion mindst 4 timer om ugen (medregn også cykling/gang til skole)	Dårlig	Ja	Jeg klarer mig middelt						0	0	1	0	0				0-10 minutter	17
Mand	17	5	0	0	1	0	0	0		I nogen grad	I høj grad	I høj grad	I meget høj grad	I nogen grad	I meget høj grad	Slet ikke	Slet ikke	I meget høj grad	I mindre grad	I nogen grad	I høj grad	I mindre grad	Middel	Meget gode	Gode	Meget dårlige	Gode	Nej	Spadserer, cykler eller har anden lettere motion mindst 4 timer om ugen (medregn også cykling/gang til skole)	God	Ja	Jeg klarer mig meget godt	I høj grad	Nej	Ja - Omsorg, sundhed og pædagogik		Horsens	0	0	0	1	0				0-10 minutter	17
Kvinde	17	5	1	1	1	0	1	0		I mindre grad	I mindre grad	I mindre grad	I nogen grad	I nogen grad	I nogen grad	I nogen grad	I nogen grad	I mindre grad	I nogen grad	I høj grad	I høj grad	I høj grad	Dårlige	Middel	Middel	Dårlige	Ved ikke	Måske	Træner hårdt og dyrker konkurrenceidræt regelmæssigt og flere gange om ugen	God	Ved ikke	Jeg klarer mig godt	I nogen grad	Nej	Ja - Omsorg, sundhed og pædagogik		Social og sundhedskolen Fyn	0	0	0	1	0				0-10 minutter	17
			0	0	0	0	0	0																														0	1	0	0	0
Kvinde	17	20	1	0	1	1	1	0		I nogen grad	I høj grad	I nogen grad	I høj grad	I mindre grad	I nogen grad	Slet ikke	I høj grad	I høj grad	I høj grad	I høj grad	I høj grad	I nogen grad	Middel	Middel	Gode	Gode	Ved ikke	Nej	Spadserer, cykler eller har anden lettere motion mindst 4 timer om ugen (medregn også cykling/gang til skole)	Nogenlunde	Ja	Jeg klarer mig godt	I nogen grad	Nej	Ja - Omsorg, sundhed og pædagogik		SOSU fredericia - vejle - horsens	0	0	0	1	0				15-25 minutter	17
Mand	17	0	0	0	0	0	0	1	Gå tur	I nogen grad	I mindre grad	I mindre grad	I nogen grad	I mindre grad	Slet ikke	I høj grad	I nogen grad	I meget høj grad	I nogen grad	I nogen grad	I nogen grad	I mindre grad	Meget dårlige	Meget dårlige	Meget dårlige	Dårlige	Meget gode	Nej	Spadserer, cykler eller har anden lettere motion mindst 4 timer om ugen (medregn også cykling/gang til skole)	Nogenlunde	Nej	Jeg klarer mig middelt	I nogen grad	Nej	Ja - Teknologi, byggeri og transport.		Frederikshavn	0	0	0	1	0				0-10 minutter	17
Kvinde	18	over 60	0	0	1	1	1	0		I nogen grad	I mindre grad	Slet ikke	I nogen grad	I mindre grad	I mindre grad	I nogen grad	I mindre grad	Slet ikke	I nogen grad	I nogen grad	I høj grad	I høj grad	Middel	Middel	Gode	Middel	Middel	Nej	Spadserer, cykler eller har anden lettere motion mindst 4 timer om ugen (medregn også cykling/gang til skole)	Nogenlunde	Nej	Jeg klarer mig middelt	I mindre grad	Ja, mere en 11 cigaretter om dagen	Ja - Omsorg, sundhed og pædagogik		Vejle	0	0	0	1	0				45 - over 60 min	18
Kvinde	17	15	0	1	1	1	0	0		I høj grad	I høj grad	I nogen grad	I meget høj grad	I høj grad	I høj grad	I mindre grad	Slet ikke	I meget høj grad	I høj grad	I meget høj grad	I høj grad	I høj grad	Gode	Gode	Gode	Meget dårlige	Gode	Nej	Spadserer, cykler eller har anden lettere motion mindst 4 timer om ugen (medregn også cykling/gang til skole)	Nogenlunde	Ja	Jeg klarer mig meget godt	I meget høj grad	Nej	Ja - Fødevarer, jordbrug og oplevelser		Aalborg Tech	0	0	0	1	0				15-25 minutter	17
Mand	17	15	0	0	1	0	0	0		I nogen grad	I mindre grad	I mindre grad	I nogen grad	I mindre grad	I høj grad	I mindre grad	I nogen grad	I høj grad	I høj grad	I høj grad	I høj grad	I nogen grad	Middel	Middel	Gode	Middel	Gode	Nej	Spadserer, cykler eller har anden lettere motion mindst 4 timer om ugen (medregn også cykling/gang til skole)	Nogenlunde	Ved ikke	Jeg klarer mig meget godt	I nogen grad	ja, 1-5 cigaretter om dagen	Ja - Teknologi, byggeri og transport.		Aarhus Tech	0	0	0	1	0				15-25 minutter	17
Mand	18	5	0	0	0	1	0	0		I meget høj grad							Slet ikke	Slet ikke																				0	0	1	0	0				0-10 minutter	18
Kvinde	18	10	1	0	0	0	0	0		Ved ikke	I nogen grad	I høj grad	Ved ikke	I nogen grad	I høj grad	Slet ikke	Ved ikke	I nogen grad	I nogen grad	I nogen grad	I nogen grad	I høj grad	Middel	Meget gode	Middel	Ved ikke	Ved ikke	Nej	Læser, ser fjernsyn eller har anden stillesiddende beskæftigelse	Nogenlunde	Ja	Jeg klarer mig godt	I nogen grad	Nej	Ja - Omsorg, sundhed og pædagogik		Social og sundhed fyn	0	0	0	1	0				0-10 minutter	18
Kvinde	17	10	1	1	0	1	1	0		I høj grad	I høj grad	I høj grad	I meget høj grad	I mindre grad	I høj grad	I mindre grad	Slet ikke	I meget høj grad	I nogen grad	I meget høj grad	I meget høj grad	I nogen grad	Gode	Gode	Gode	Gode	Middel	Ja	Spadserer, cykler eller har anden lettere motion mindst 4 timer om ugen (medregn også cykling/gang til skole)	Dårlig	Ja	Jeg klarer mig middelt	I meget høj grad	Nej	Ja - Omsorg, sundhed og pædagogik		SOSU	0	0	0	1	0				0-10 minutter	17
			0	0	0	0	0	0																														0	1	0	0	0
Mand	17	35	1	0	1	0	0	0		I meget høj grad	I nogen grad	I meget høj grad	I meget høj grad	I meget høj grad	Slet ikke	Slet ikke	Slet ikke	I meget høj grad	I høj grad	I høj grad	I høj grad	I meget høj grad	Gode	Dårlige	Middel	Gode	Dårlige	Nej	Træner hårdt og dyrker konkurrenceidræt regelmæssigt og flere gange om ugen	Nogenlunde	Ja	Jeg klarer mig godt	I høj grad	Nej	Ja - Omsorg, sundhed og pædagogik		Vejle	0	0	0	1	0				30-40 minutter	17
Kvinde	17	10	1	0	0	0	0	0		I nogen grad	I høj grad	I nogen grad	I meget høj grad	I nogen grad	I nogen grad	I nogen grad	I nogen grad	I nogen grad	I høj grad	I nogen grad	I meget høj grad	I nogen grad	Gode	Gode	Gode	Gode	Gode	Måske	Spadserer, cykler eller har anden lettere motion mindst 4 timer om ugen (medregn også cykling/gang til skole)	Nogenlunde	Nej	Jeg klarer mig meget godt	I nogen grad	Ja en gang imellem til fester	Ja - Omsorg, sundhed og pædagogik		Social og sundhedsskolen Syd	0	0	0	1	0				0-10 minutter	17
			0	0	0	0	0	0																														0	1	0	0	0
			0	0	0	0	0	0																														0	1	0	0	0
Kvinde	16	5	0	0	1	0	0	0		Ved ikke	Ved ikke	Ved ikke	Ved ikke	Ved ikke	Ved ikke	Ved ikke	Ved ikke	Ved ikke	Ved ikke	Ved ikke	Ved ikke	Ved ikke	Ved ikke	Ved ikke	Ved ikke	Ved ikke	Ved ikke	Ved ikke	Dyrker motionsidræt, løber eller lignende mindst 4 timer om ugen	Virkelig god	Ved ikke	Ved ikke	Ved ikke	Nej	Ja - Omsorg, sundhed og pædagogik		Vejle	0	0	0	1	0				0-10 minutter	16
Mand	18	45	0	0	1	0	0	0		I høj grad	I meget høj grad	I meget høj grad	I meget høj grad	I meget høj grad	I nogen grad	I høj grad	I høj grad	I meget høj grad	I nogen grad	I meget høj grad	I nogen grad	I meget høj grad	Gode	Meget dårlige	Dårlige	Middel	Dårlige	Nej	Spadserer, cykler eller har anden lettere motion mindst 4 timer om ugen (medregn også cykling/gang til skole)	God	Ja	Jeg klarer mig middelt	I meget høj grad	Nej	Ja - Teknologi, byggeri og transport.		EUC FR.Havn	0	0	0	1	0				45 - over 60 min	18
Kvinde	17	5	0	0	1	0	0	0		I høj grad	I mindre grad	I mindre grad	I nogen grad	Slet ikke	I nogen grad	I mindre grad	I nogen grad	I høj grad	I nogen grad	I meget høj grad	I meget høj grad	Slet ikke	Gode	Middel	Middel	Gode	Gode	Nej	Spadserer, cykler eller har anden lettere motion mindst 4 timer om ugen (medregn også cykling/gang til skole)	Nogenlunde	Nej	Jeg klarer mig godt	I meget høj grad	Nej	Ja - Omsorg, sundhed og pædagogik		SOSU Vejle	0	0	0	1	0				0-10 minutter	17
Mand	16	20	0	0	0	0	0	1	gå tur	I nogen grad	I nogen grad	I nogen grad	I nogen grad	Slet ikke	I mindre grad	I nogen grad	I nogen grad	I nogen grad	I nogen grad	I nogen grad	I nogen grad	I høj grad	Middel	Middel	Middel	Middel	Middel	Ved ikke	Spadserer, cykler eller har anden lettere motion mindst 4 timer om ugen (medregn også cykling/gang til skole)	God	Ved ikke	Jeg klarer mig godt	I høj grad	Nej	Nej - jeg ved ikke hvilket hovedområde, jeg er tilknyttet (skriv gerne hvad din uddannelse hedder)	skibsmontør	EUC nord	0	0	0	1	0				15-25 minutter	16
Kvinde	17	0	0	1	0	0	0	0		I nogen grad	I nogen grad	I høj grad	I høj grad	I nogen grad	I høj grad	I nogen grad	I nogen grad	I høj grad	I høj grad	I høj grad	I høj grad	I høj grad	Meget gode	Gode	Gode	Middel	Gode	Nej	Spadserer, cykler eller har anden lettere motion mindst 4 timer om ugen (medregn også cykling/gang til skole)	Nogenlunde	Ved ikke	Jeg klarer mig godt	I høj grad	Nej	Ja - Omsorg, sundhed og pædagogik		Esbjerg	0	0	0	1	0				0-10 minutter	17
Kvinde	17	5	0	0	1	0	0	0		I nogen grad	I nogen grad	Ved ikke	I høj grad	Ved ikke	I nogen grad	Ved ikke	I nogen grad	I nogen grad	Slet ikke	I høj grad	I nogen grad	I nogen grad	Meget gode	Dårlige	Meget gode	Middel	Middel	Nej	Dyrker motionsidræt, løber eller lignende mindst 4 timer om ugen	Nogenlunde	Ja	Jeg klarer mig middelt	I høj grad	Ja en gang imellem til fester	Ja - Omsorg, sundhed og pædagogik		SOSU EUX vejle	0	0	0	1	0				0-10 minutter	17
Mand	17	over 60	0	0	1	0	1	0																														0	0	1	0	0				45 - over 60 min	17
Mand	17	25	0	1	0	0	0	0		I meget høj grad	I meget høj grad	I meget høj grad	I meget høj grad	I meget høj grad	I meget høj grad	Slet ikke	Slet ikke	I meget høj grad	Slet ikke	Slet ikke	Slet ikke	Slet ikke	Middel	Meget gode	Meget gode	Meget gode	Meget gode	Nej	Træner hårdt og dyrker konkurrenceidræt regelmæssigt og flere gange om ugen	God	Nej	Jeg klarer mig godt	I meget høj grad	Nej	Ja - Omsorg, sundhed og pædagogik		Sosu Esbjerg	0	0	0	1	0				15-25 minutter	17
Kvinde	17	5	0	0	0	0	0	1	Ikke rigtig noget																													0	0	1	0	0				0-10 minutter	17
			0	0	0	0	0	0																														0	1	0	0	0
			0	0	0	0	0	0																														0	1	0	0	0
Kvinde	17	0	0	0	1	0	0	0		Ved ikke	Slet ikke	Slet ikke	I nogen grad	Slet ikke	I meget høj grad	Slet ikke	I nogen grad	I høj grad	I mindre grad	Slet ikke	I meget høj grad	Slet ikke	Middel	Dårlige	Middel	Middel	Dårlige	Nej	Læser, ser fjernsyn eller har anden stillesiddende beskæftigelse	Nogenlunde	Ja	Jeg klarer mig meget godt	I høj grad	Nej	Ja - Fødevarer, jordbrug og oplevelser		Aalborg food college	0	0	0	1	0				0-10 minutter	17
Mand	17	over 60	0	1	0	0	0	0		I høj grad	I høj grad	I meget høj grad	I høj grad	I mindre grad	I høj grad	Slet ikke	I nogen grad	I meget høj grad	I mindre grad	I meget høj grad	I høj grad	I meget høj grad	Middel	Gode	Middel	Meget dårlige	Meget dårlige	Måske	Træner hårdt og dyrker konkurrenceidræt regelmæssigt og flere gange om ugen	Virkelig god	Nej	Jeg klarer mig meget godt	I meget høj grad	Ja en gang imellem til fester	Ja - Teknologi, byggeri og transport.		Eucnvs	0	0	0	1	0				45 - over 60 min	17
Kvinde	19	45	0	1	0	0	0	0		I høj grad	I nogen grad	I mindre grad	I meget høj grad	Slet ikke	Slet ikke	I nogen grad	Ved ikke	I mindre grad	I nogen grad	I høj grad	I nogen grad	I høj grad	Dårlige	Meget gode	Dårlige	Gode	Dårlige	Ja	Dyrker motionsidræt, løber eller lignende mindst 4 timer om ugen	Nogenlunde	Nej	Jeg klarer mig middelt	I nogen grad	Nej	Ja - Omsorg, sundhed og pædagogik		Sosu esbjerg	0	0	0	1	0				45 - over 60 min	19
Mand	16	45	0	1	1	1	0	0		I høj grad	I nogen grad	I høj grad	I høj grad	I nogen grad	I nogen grad	Slet ikke	Slet ikke	I høj grad	I høj grad	I nogen grad	I meget høj grad	I nogen grad	Middel	Gode	Gode	Ved ikke	Middel	Måske										0	0	1	0	0				45 - over 60 min	16
Kvinde	27	over 60	0	0	0	0	1	0		I meget høj grad	I meget høj grad	I meget høj grad	I meget høj grad	I meget høj grad	I meget høj grad	I meget høj grad	I meget høj grad	I meget høj grad	I meget høj grad	I meget høj grad	I meget høj grad	I meget høj grad	Meget gode	Meget gode	Meget gode	Meget gode	Meget gode	Nej	Træner hårdt og dyrker konkurrenceidræt regelmæssigt og flere gange om ugen	Virkelig god	Ja	Jeg klarer mig meget godt	I meget høj grad	Ja, mere en 11 cigaretter om dagen	Ja - Omsorg, sundhed og pædagogik		Ammo	0	0	0	1	0				45 - over 60 min
			0	0	0	0	0	0																														0	1	0	0	0
			0	0	0	0	0	0																														0	1	0	0	0
Mand	17	10	0	0	0	1	0	0		I nogen grad	I mindre grad	I høj grad	I mindre grad	I nogen grad	I høj grad	I nogen grad	I mindre grad	I meget høj grad	I nogen grad	I nogen grad	I nogen grad	I nogen grad	Gode	Gode	Gode	Gode	Middel	Ja	Spadserer, cykler eller har anden lettere motion mindst 4 timer om ugen (medregn også cykling/gang til skole)	Mindre god	Ved ikke	Jeg klarer mig middelt	Slet ikke	ja, 1-5 cigaretter om dagen	Ja - Fødevarer, jordbrug og oplevelser		CELF VINK	0	0	0	1	0				0-10 minutter	17
Kvinde	17	20	0	1	1	0	0	0		I meget høj grad	I høj grad	I høj grad	I meget høj grad	I meget høj grad	I meget høj grad	Slet ikke	Slet ikke	I høj grad	I høj grad	I høj grad	I høj grad	I høj grad																0	0	1	0	0				15-25 minutter	17
Mand	16	over 60	0	1	0	0	0	0		I meget høj grad	I meget høj grad	I meget høj grad	I meget høj grad	I meget høj grad	I meget høj grad	I meget høj grad	I meget høj grad	I meget høj grad	Ved ikke	Slet ikke	I høj grad	I høj grad	Meget gode	Meget dårlige	Meget gode	Meget dårlige	Ved ikke	Nej	Træner hårdt og dyrker konkurrenceidræt regelmæssigt og flere gange om ugen	Virkelig god	Nej	Jeg klarer mig meget godt	I meget høj grad	Nej	Ja - Teknologi, byggeri og transport.		Holbæk euc	0	0	0	1	0				45 - over 60 min	16
Mand	17	5	0	0	1	0	0	0		I meget høj grad	I meget høj grad	I meget høj grad	I meget høj grad	I nogen grad	Slet ikke	Slet ikke	I mindre grad	I meget høj grad	I høj grad	I meget høj grad	I mindre grad	I meget høj grad	Gode	Meget gode	Meget gode	Ved ikke	Middel	Nej	Dyrker motionsidræt, løber eller lignende mindst 4 timer om ugen	God	Ja	Jeg klarer mig godt	I høj grad	Nej	Ja - Teknologi, byggeri og transport.		EUC Holbæk	0	0	0	1	0				0-10 minutter	17
Kvinde	19	25	1	1	1	0	0	0		I høj grad	I høj grad	I høj grad	I høj grad	I høj grad	I høj grad	I mindre grad	I mindre grad	I høj grad	I meget høj grad	Slet ikke	I meget høj grad	I meget høj grad	Gode	Gode	Gode	Meget gode	Middel	Nej	Dyrker motionsidræt, løber eller lignende mindst 4 timer om ugen	Nogenlunde	Ja	Jeg klarer mig godt	I høj grad	ja, 6-10 cigaretter om dagen	Ja - Omsorg, sundhed og pædagogik		Sosu Aarhus	0	0	0	1	0				15-25 minutter	19
			0	0	0	0	0	0																														0	1	0	0	0
Mand	17	5	0	0	1	0	0	0																														0	0	1	0	0				0-10 minutter	17
Mand	16	35	1	0	0	0	1	0		I nogen grad	I høj grad	I nogen grad	I høj grad	I mindre grad	I høj grad	Slet ikke	I høj grad	I meget høj grad	I meget høj grad	I nogen grad	I høj grad	I høj grad	Gode	Middel	Gode	Ved ikke	Middel	Nej	Spadserer, cykler eller har anden lettere motion mindst 4 timer om ugen (medregn også cykling/gang til skole)	God	Ved ikke	Jeg klarer mig middelt	I høj grad	ja, 1-5 cigaretter om dagen	Ja - Teknologi, byggeri og transport.		Mercantec viborg	0	0	0	1	0				30-40 minutter	16
Kvinde	16	45	0	0	1	0	0	0		Ved ikke	I nogen grad	I mindre grad	I nogen grad	Slet ikke	Slet ikke	Slet ikke	Ved ikke	I nogen grad	Ved ikke	I nogen grad	I nogen grad	Ved ikke	Ved ikke	Gode	Middel	Middel	Ved ikke	Nej	Læser, ser fjernsyn eller har anden stillesiddende beskæftigelse	Mindre god	Ja	Jeg klarer mig godt	I nogen grad	Nej	Ja - Teknologi, byggeri og transport.		Aarhus Tech	0	0	0	1	0				45 - over 60 min	16
			0	0	0	0	0	0																														0	1	0	0	0
Mand	18	20	0	1	1	0	0	0		I høj grad	I meget høj grad	I nogen grad	I meget høj grad	I nogen grad	I meget høj grad	Slet ikke	I mindre grad	I høj grad	I nogen grad	I høj grad	I nogen grad	I høj grad	Gode	Gode	Gode	Dårlige	Gode	Nej	Spadserer, cykler eller har anden lettere motion mindst 4 timer om ugen (medregn også cykling/gang til skole)	Nogenlunde	Ja	Jeg klarer mig middelt	I høj grad	ja, 6-10 cigaretter om dagen	Ja - Fødevarer, jordbrug og oplevelser		Aarhus tech, kokkenlingen	0	0	0	1	0				15-25 minutter	18
Mand	17	30	0	0	1	0	0	0		I høj grad	I nogen grad	I meget høj grad	I meget høj grad	I nogen grad	I høj grad	Slet ikke	Slet ikke	I meget høj grad	I høj grad	I nogen grad	I nogen grad	I høj grad	Middel	Middel	Middel	Middel	Gode	Nej	Spadserer, cykler eller har anden lettere motion mindst 4 timer om ugen (medregn også cykling/gang til skole)	Nogenlunde	Ja	Jeg klarer mig middelt	I høj grad	Nej	Ja - Teknologi, byggeri og transport.		Skive Teknisk Skole	0	0	0	1	0				30-40 minutter	17
Mand	17	0	0	0	0	0	0	1	intet	Ved ikke	Ved ikke	Ved ikke	Ved ikke	Ved ikke	Ved ikke	Ved ikke	Ved ikke	Ved ikke	Ved ikke	Ved ikke	Ved ikke	Ved ikke	Ved ikke	Ved ikke	Ved ikke	Ved ikke	Ved ikke	Ja	Træner hårdt og dyrker konkurrenceidræt regelmæssigt og flere gange om ugen	Virkelig god	Ved ikke	Jeg klarer mig meget godt	I høj grad	Nej	Ja - Teknologi, byggeri og transport.		CELF Nykøbing F.	0	0	0	1	0				0-10 minutter	17
Mand	18	over 60	0	0	0	1	1	0		I mindre grad	I mindre grad	I mindre grad	I høj grad	I nogen grad	I nogen grad	I mindre grad	I mindre grad	I høj grad	I høj grad	I høj grad	I nogen grad	I nogen grad	Meget dårlige	Meget dårlige	Meget dårlige	Meget dårlige	Meget dårlige	Nej	Træner hårdt og dyrker konkurrenceidræt regelmæssigt og flere gange om ugen	God	Ved ikke	Jeg klarer mig middelt	I høj grad	Nej	Ja - Teknologi, byggeri og transport.		Århus tech	0	0	0	1	0				45 - over 60 min	18
Mand	18	25	0	1	0	0	0	0		I nogen grad	I høj grad	I nogen grad	I nogen grad	I nogen grad	I nogen grad	Slet ikke	Slet ikke	I nogen grad	I høj grad	I høj grad	I høj grad	I høj grad	Middel	Dårlige	Middel	Middel	Meget dårlige	Nej	Træner hårdt og dyrker konkurrenceidræt regelmæssigt og flere gange om ugen	God	Ja	Jeg klarer mig meget godt	I meget høj grad	Nej	Ja - Teknologi, byggeri og transport.		euc nord	0	0	0	1	0				15-25 minutter	18
			0	0	0	0	0	0																														0	1	0	0	0
Mand	17	5	1	0	0	0	0	0		I høj grad	I høj grad	I høj grad	I høj grad	I høj grad	I høj grad	Slet ikke	I mindre grad	I høj grad																				0	0	1	0	0				0-10 minutter	17
Mand	16	50	0	1	0	0	0	0		I mindre grad	I mindre grad	Slet ikke	I mindre grad	Slet ikke	I mindre grad	Slet ikke	I mindre grad	I nogen grad	I mindre grad	I nogen grad	I nogen grad	Slet ikke	Middel	Middel	Ved ikke	Ved ikke	Ved ikke	Nej	Dyrker motionsidræt, løber eller lignende mindst 4 timer om ugen	God	Nej	Jeg klarer mig meget godt	I meget høj grad	Nej	Ja - Teknologi, byggeri og transport.		aarhus tech	0	0	0	1	0				45 - over 60 min	16
Kvinde	17	25	1	0	1	0	0	0		I nogen grad	I meget høj grad	I meget høj grad	I meget høj grad	I meget høj grad	I meget høj grad	I mindre grad	I mindre grad	I meget høj grad	I meget høj grad	I meget høj grad	I meget høj grad	I meget høj grad	Gode	Meget gode	Middel	Gode	Gode	Nej	Spadserer, cykler eller har anden lettere motion mindst 4 timer om ugen (medregn også cykling/gang til skole)	God	Ja	Jeg klarer mig godt	I høj grad	Nej	Ja - Omsorg, sundhed og pædagogik		SOSU Esbjerg	0	0	0	1	0				15-25 minutter	17
			0	0	0	0	0	0																														0	1	0	0	0
Kvinde	17	15	1	1	0	0	0	0		I meget høj grad	I meget høj grad	I meget høj grad	I meget høj grad	I mindre grad	I nogen grad	Slet ikke	Slet ikke	I meget høj grad	I nogen grad	I høj grad	I meget høj grad	I meget høj grad	Meget gode	Gode	Meget gode	Meget gode	Middel	Nej	Træner hårdt og dyrker konkurrenceidræt regelmæssigt og flere gange om ugen	God	Ved ikke	Jeg klarer mig meget godt	I høj grad	Nej	Ja - Omsorg, sundhed og pædagogik		SOSU Esbjerg	0	0	0	1	0				15-25 minutter	17
Kvinde	16	20	0	1	0	0	0	0		I nogen grad	I høj grad	I nogen grad	I meget høj grad	I høj grad	I nogen grad	Slet ikke	I høj grad	I meget høj grad	I nogen grad	I nogen grad	I høj grad	I nogen grad	Middel	Gode	Gode	Meget gode	Meget gode	Nej	Spadserer, cykler eller har anden lettere motion mindst 4 timer om ugen (medregn også cykling/gang til skole)	Nogenlunde	Ja	Jeg klarer mig meget godt	I høj grad	ja, 6-10 cigaretter om dagen	Ja - Omsorg, sundhed og pædagogik		SOSU Esbjerg	0	0	0	1	0				15-25 minutter	16
Mand	16	15	0	1	0	0	0	0		I nogen grad	I nogen grad	I nogen grad	I nogen grad	Slet ikke	Slet ikke	I mindre grad	I mindre grad	I meget høj grad	I mindre grad	I meget høj grad	I meget høj grad	I høj grad	Gode	Middel	Middel	Middel	Meget dårlige	Ja	Læser, ser fjernsyn eller har anden stillesiddende beskæftigelse	Nogenlunde	Ved ikke	Jeg klarer mig middelt	I høj grad	Nej	Ja - Teknologi, byggeri og transport.		Aarhus Tech	0	0	0	1	0				15-25 minutter	16
Mand	17	5	0	0	0	0	0	1	walk and talk	Ved ikke	I nogen grad	Ved ikke	Ved ikke	Slet ikke	Slet ikke	Slet ikke	I mindre grad	I meget høj grad	I høj grad	I nogen grad	I høj grad	Slet ikke	Gode	Dårlige	Middel	Meget dårlige	Ved ikke	Nej	Træner hårdt og dyrker konkurrenceidræt regelmæssigt og flere gange om ugen	Virkelig god	Ved ikke							0	0	1	0	0				0-10 minutter	17
			0	0	0	0	0	0																														0	1	0	0	0
Kvinde	16	45	1	1	1	0	0	1	Morgen/ eftermiddags aktivitet	I nogen grad	I nogen grad	I nogen grad	I nogen grad	I mindre grad	I mindre grad	I mindre grad	I mindre grad	I høj grad	I nogen grad	I høj grad	I nogen grad	I mindre grad	Gode	Gode	Gode	Meget gode	Meget gode	Nej	Spadserer, cykler eller har anden lettere motion mindst 4 timer om ugen (medregn også cykling/gang til skole)	Nogenlunde	Ved ikke	Jeg klarer mig godt	I mindre grad	Nej	Ja - Omsorg, sundhed og pædagogik		SOSU Aarhus	0	0	0	1	0				45 - over 60 min	16
Mand	17	5	0	1	0	1	0	0		I høj grad	I mindre grad	I nogen grad	I nogen grad	Slet ikke	I meget høj grad	Slet ikke	I nogen grad	I nogen grad	I meget høj grad	Slet ikke	I mindre grad	I meget høj grad	Gode	Gode	Meget gode	Ved ikke	Ved ikke	Nej	Træner hårdt og dyrker konkurrenceidræt regelmæssigt og flere gange om ugen	Nogenlunde	Ja	Jeg klarer mig godt	Slet ikke	Nej	Ja - Teknologi, byggeri og transport.		EUC Syd, Sønderborg	0	0	0	1	0				0-10 minutter	17
Kvinde	17	10	0	0	1	0	0	0		I nogen grad	Slet ikke	I mindre grad	I nogen grad	I nogen grad	I nogen grad	I nogen grad	I nogen grad	I nogen grad	I nogen grad	I nogen grad	I nogen grad	I nogen grad	Gode	Gode	Gode	Ved ikke	Gode	Måske	Læser, ser fjernsyn eller har anden stillesiddende beskæftigelse	Mindre god	Nej	Jeg klarer mig middelt	I høj grad	ja, 6-10 cigaretter om dagen	Ja - Teknologi, byggeri og transport.		Holbæk EUC	0	0	0	1	0				0-10 minutter	17
Mand	17	30	0	0	1	0	0	0		Ved ikke	Ved ikke	Ved ikke	Ved ikke	Ved ikke	Ved ikke	Ved ikke	Ved ikke	Ved ikke	Ved ikke	Ved ikke	Ved ikke	Ved ikke	Ved ikke	Ved ikke	Ved ikke	Ved ikke	Ved ikke	Ved ikke	Spadserer, cykler eller har anden lettere motion mindst 4 timer om ugen (medregn også cykling/gang til skole)	Nogenlunde	Ved ikke	Ved ikke	Ved ikke	Nej	Ja - Teknologi, byggeri og transport.		Eucnord	0	0	0	1	0				30-40 minutter	17
Mand	18	10	0	1	0	0	0	0		I meget høj grad	I meget høj grad	I nogen grad	I meget høj grad	I meget høj grad	I meget høj grad	I nogen grad	I mindre grad	I meget høj grad	I meget høj grad	I meget høj grad	I mindre grad	I meget høj grad	Middel	Gode	Gode	Meget dårlige	Meget dårlige	Ved ikke	Spadserer, cykler eller har anden lettere motion mindst 4 timer om ugen (medregn også cykling/gang til skole)	God	Ja	Jeg klarer mig godt	I høj grad	Nej	Ja - Teknologi, byggeri og transport.		EUC	0	0	0	1	0				0-10 minutter	18
Mand	17	35	0	0	1	0	0	0		I høj grad	I høj grad	I meget høj grad	I meget høj grad	I nogen grad	I meget høj grad	Slet ikke	Slet ikke	I meget høj grad	I nogen grad	I mindre grad	I meget høj grad	I mindre grad	Meget gode	Meget gode	Meget gode	Gode	Middel	Nej	Dyrker motionsidræt, løber eller lignende mindst 4 timer om ugen	Nogenlunde	Ved ikke	Jeg klarer mig godt	I høj grad	Nej	Ja - Teknologi, byggeri og transport.		Skive tekniske skole	0	0	0	1	0				30-40 minutter	17
Mand	17	10	0	0	1	0	0	0		I høj grad	I meget høj grad	I høj grad	I høj grad	I høj grad	I nogen grad	I meget høj grad	I høj grad	I høj grad	I høj grad	I høj grad	I meget høj grad	I høj grad	Gode	Gode	Gode	Gode	Gode	Ja	Træner hårdt og dyrker konkurrenceidræt regelmæssigt og flere gange om ugen	God	Ja	Jeg klarer mig meget godt	I nogen grad	Ja en gang imellem til fester	Ja - Omsorg, sundhed og pædagogik		horsens sosu	0	0	0	1	0				0-10 minutter	17
Mand	17	20	0	0	0	0	1	0		I meget høj grad	I høj grad	I høj grad	I høj grad	I nogen grad	I meget høj grad	Ved ikke	Slet ikke	I meget høj grad	I høj grad	I høj grad	I meget høj grad	I nogen grad	Gode	Middel	Gode	Middel	Middel	Ja	Læser, ser fjernsyn eller har anden stillesiddende beskæftigelse	Dårlig	Ja	Jeg klarer mig godt	I høj grad	Nej	Ja - Teknologi, byggeri og transport.		EUC Nordvestsjælland	0	0	0	1	0				15-25 minutter	17
Kvinde	17	25	1	1	1	0	0	0		Slet ikke	Slet ikke	Slet ikke	I mindre grad	I nogen grad	I høj grad	I nogen grad	Slet ikke	I mindre grad	I mindre grad	I høj grad	I høj grad	I nogen grad	Middel	Middel	Gode	Middel	Meget dårlige	Nej	Dyrker motionsidræt, løber eller lignende mindst 4 timer om ugen	God	Nej	Ved ikke	Ved ikke	Ja, mere en 11 cigaretter om dagen	Ja - Omsorg, sundhed og pædagogik		EUC Nordvestsjælland	0	0	0	1	0				15-25 minutter	17
Mand	16	30	0	0	1	0	0	1	Walk and talk	I nogen grad	I nogen grad	Ved ikke	I høj grad	Slet ikke	Slet ikke	I nogen grad	I nogen grad	I meget høj grad	I høj grad	I høj grad	I høj grad	I nogen grad	Gode	Gode	Gode	Gode	Meget dårlige	Nej	Læser, ser fjernsyn eller har anden stillesiddende beskæftigelse	Mindre god	Ja	Jeg klarer mig godt	I mindre grad	Ja en gang imellem til fester	Ja - Teknologi, byggeri og transport.		Aarhus Tech	0	0	0	1	0				30-40 minutter	16
Mand	17	over 60	0	0	0	0	1	0		I mindre grad	I mindre grad	Slet ikke	I høj grad	Slet ikke	I nogen grad	I meget høj grad	Slet ikke	I mindre grad	I mindre grad	I meget høj grad	I nogen grad	Ved ikke	Gode	Gode	Ved ikke	Ved ikke	Ved ikke	Måske	Spadserer, cykler eller har anden lettere motion mindst 4 timer om ugen (medregn også cykling/gang til skole)	Nogenlunde	Nej	Jeg klarer mig godt	I nogen grad	Nej	Ja - Teknologi, byggeri og transport.		Aarhus Tech	0	0	0	1	0				45 - over 60 min	17
Kvinde	17	55	0	1	1	0	0	0		I meget høj grad	I meget høj grad	I høj grad	I meget høj grad	I høj grad	I meget høj grad	Slet ikke	Slet ikke	I meget høj grad	I høj grad	I meget høj grad	I meget høj grad	I meget høj grad	Gode	Gode	Middel	Middel	Gode	Nej	Dyrker motionsidræt, løber eller lignende mindst 4 timer om ugen									0	0	1	0	0				45 - over 60 min	17
Kvinde	18	10	0	0	1	0	0	0		I nogen grad	I nogen grad	I nogen grad	I nogen grad	I nogen grad	I nogen grad	I nogen grad	I nogen grad	I nogen grad	I nogen grad	I nogen grad	I nogen grad	I nogen grad	Middel	Middel	Middel	Middel	Middel	Nej	Læser, ser fjernsyn eller har anden stillesiddende beskæftigelse	Nogenlunde	Ved ikke	Jeg klarer mig middelt	I nogen grad	Ja, mere en 11 cigaretter om dagen	Ja - Teknologi, byggeri og transport.		Euc nodvestsjælland	0	0	0	1	0				0-10 minutter	18
Mand	17	15	1	1	0	0	0	0		I nogen grad	I mindre grad	I nogen grad	I nogen grad	Slet ikke	I meget høj grad	Slet ikke	I høj grad	I meget høj grad	I meget høj grad	I høj grad	I nogen grad	I nogen grad	Middel	Gode	Middel	Gode	Gode	Nej	Dyrker motionsidræt, løber eller lignende mindst 4 timer om ugen	God	Nej	Jeg klarer mig godt	I meget høj grad	Ja, mere en 11 cigaretter om dagen	Ja - Fødevarer, jordbrug og oplevelser		Aarhus tech	0	0	0	1	0				15-25 minutter	17
			0	0	0	0	0	0																														0	1	0	0	0
			0	0	0	0	0	0																														0	1	0	0	0
Kvinde	17	10	0	1	0	0	0	0		I høj grad	I meget høj grad	I meget høj grad	I meget høj grad	I nogen grad	I nogen grad	I høj grad	I høj grad	I høj grad	I høj grad	I nogen grad	I nogen grad	I høj grad	Gode	Dårlige	Gode	Meget gode	Gode	Måske	Spadserer, cykler eller har anden lettere motion mindst 4 timer om ugen (medregn også cykling/gang til skole)	Nogenlunde	Ja	Jeg klarer mig middelt	I høj grad	Ja en gang imellem til fester	Ja - Omsorg, sundhed og pædagogik		Sosu Esbjerg	0	0	0	1	0				0-10 minutter	17
			0	0	0	0	0	0																														0	1	0	0	0
Kvinde	17	20	1	1	0	0	0	0		I nogen grad	I nogen grad	I nogen grad	I nogen grad	I mindre grad	I nogen grad	I mindre grad	I nogen grad	I nogen grad	I nogen grad	I nogen grad	I nogen grad	I nogen grad	Middel	Gode	Middel	Middel	Middel	Måske	Spadserer, cykler eller har anden lettere motion mindst 4 timer om ugen (medregn også cykling/gang til skole)	Nogenlunde	Ja	Jeg klarer mig middelt	I nogen grad	Nej	Ja - Omsorg, sundhed og pædagogik		Odense Syd	0	0	0	1	0				15-25 minutter	17
Kvinde	18		0	0	0	0	0	0																														0	0	1	0	0					18
Mand	16	0	0	0	1	0	0	0		Slet ikke	Slet ikke	Slet ikke	Slet ikke	Slet ikke	Slet ikke	I høj grad	I meget høj grad	Slet ikke	Slet ikke	Slet ikke	Slet ikke	Slet ikke	Meget dårlige	Meget dårlige	Meget dårlige	Meget dårlige	Middel	Ja	Læser, ser fjernsyn eller har anden stillesiddende beskæftigelse	Virkelig god	Nej	Jeg klarer mig godt	I mindre grad	Ja, mere en 11 cigaretter om dagen	Ja - Teknologi, byggeri og transport.		BORNHOLM	0	0	0	1	0				0-10 minutter	16
Mand	19	over 60	1	0	0	0	1	0		I meget høj grad	I nogen grad	I meget høj grad	I meget høj grad	Slet ikke	I meget høj grad	Slet ikke	I nogen grad	I meget høj grad	I høj grad	I nogen grad	I meget høj grad	I meget høj grad	Middel	Gode	Middel	Ved ikke	Ved ikke	Nej	Læser, ser fjernsyn eller har anden stillesiddende beskæftigelse	God	Ja	Jeg klarer mig meget godt	I meget høj grad	Ja en gang imellem til fester	Ja - Teknologi, byggeri og transport.		EUC nvs	0	0	0	1	0				45 - over 60 min	19
Mand	17	45	0	1	0	1	0	1	Walk and Talk	I høj grad	I nogen grad	I nogen grad	I nogen grad	I nogen grad	I høj grad	I mindre grad	I mindre grad	I meget høj grad	I mindre grad	I nogen grad	I nogen grad	I mindre grad	Gode	Meget gode	Gode	Middel	Ved ikke	Måske	Spadserer, cykler eller har anden lettere motion mindst 4 timer om ugen (medregn også cykling/gang til skole)	God	Nej	Jeg klarer mig godt	I høj grad	Nej	Ja - Teknologi, byggeri og transport.		Aarhus Tech	0	0	0	1	0				45 - over 60 min	17
Mand	16	over 60	0	0	0	1	0	0		I nogen grad	I høj grad	I meget høj grad	I mindre grad	I høj grad	I nogen grad	Ved ikke	I høj grad	Slet ikke	I mindre grad	Ved ikke	I mindre grad	I meget høj grad	Dårlige	Meget dårlige	Gode	Meget gode	Middel	Ja	Dyrker motionsidræt, løber eller lignende mindst 4 timer om ugen	Mindre god	Ved ikke	Jeg klarer mig godt	I nogen grad	ja, 6-10 cigaretter om dagen	Ja - Fødevarer, jordbrug og oplevelser		Jd	0	0	0	1	0				45 - over 60 min	16
Mand	17	5	0	0	1	0	0	0		I mindre grad	I mindre grad	I nogen grad	Slet ikke	I nogen grad	I nogen grad	Slet ikke	I mindre grad	I høj grad	I høj grad	I meget høj grad	I mindre grad	I nogen grad	Middel	Dårlige	Middel	Middel	Meget dårlige	Måske	Dyrker motionsidræt, løber eller lignende mindst 4 timer om ugen	Nogenlunde	Ja	Jeg klarer mig godt	I nogen grad	Nej	Ja - Teknologi, byggeri og transport.		Campus Bornholm	0	0	0	1	0				0-10 minutter	17
Mand	16	15	0	0	0	0	0	1	Hente / Aflevere ting	I mindre grad	I nogen grad	I nogen grad	I høj grad	I nogen grad	I høj grad	Slet ikke	Slet ikke	I høj grad	I nogen grad	I høj grad	I nogen grad	I nogen grad	Middel	Middel	Gode	Gode	Middel	Nej	Spadserer, cykler eller har anden lettere motion mindst 4 timer om ugen (medregn også cykling/gang til skole)	Nogenlunde	Ja	Jeg klarer mig godt	I høj grad	Nej	Ja - Teknologi, byggeri og transport.		EUC Nordvestsjælland	0	0	0	1	0				15-25 minutter	16
Kvinde	17	30	0	0	0	0	0	1	Om morgenen og om eftermiddagen	Slet ikke	I mindre grad	I nogen grad	I nogen grad	I mindre grad	Slet ikke	I nogen grad	I høj grad	I nogen grad	I meget høj grad	Slet ikke	I mindre grad	I nogen grad	Gode	Middel	Gode	Meget gode	Meget gode	Nej	Læser, ser fjernsyn eller har anden stillesiddende beskæftigelse	Dårlig	Nej	Jeg klarer mig middelt	I høj grad	Ja, mere en 11 cigaretter om dagen	Ja - Omsorg, sundhed og pædagogik		SOSU Aarhus	0	0	0	1	0				30-40 minutter	17
Mand	17	15	0	0	1	0	0	0		Slet ikke	Slet ikke	I mindre grad	I mindre grad	Slet ikke	Slet ikke	Slet ikke	I mindre grad	I mindre grad	I mindre grad	Slet ikke	Slet ikke	Ved ikke	Middel	Middel	Middel	Ved ikke	Middel	Ved ikke	Læser, ser fjernsyn eller har anden stillesiddende beskæftigelse	Mindre god	Nej	Jeg klarer mig middelt	I høj grad	Ja, mere en 11 cigaretter om dagen	Ja - Teknologi, byggeri og transport.		EUC Nord frederikshavn	0	0	0	1	0				15-25 minutter	17
Mand	16	15	0	0	0	0	0	1	Vi får nogle gange lidt tid til at gå rundt	I nogen grad	I nogen grad	I nogen grad	I høj grad	I nogen grad	I nogen grad	I mindre grad	I mindre grad	I høj grad	I høj grad	I nogen grad	I høj grad	I høj grad	Dårlige	Ved ikke	Middel	Ved ikke	Ved ikke	Nej	Spadserer, cykler eller har anden lettere motion mindst 4 timer om ugen (medregn også cykling/gang til skole)	Nogenlunde	Ja	Jeg klarer mig godt	I mindre grad	Nej	Ja - Teknologi, byggeri og transport.		Aarhus Tech	0	0	0	1	0				15-25 minutter	16
Mand	18	20	0	0	1	1	0	0		I nogen grad	I mindre grad	Slet ikke	I meget høj grad	I høj grad	Slet ikke	I høj grad	I høj grad	Slet ikke	I nogen grad	I nogen grad	I høj grad	I nogen grad	Dårlige	Middel	Middel	Middel	Meget dårlige	Nej	Læser, ser fjernsyn eller har anden stillesiddende beskæftigelse	Dårlig	Nej	Jeg klarer mig godt	Slet ikke	Ja en gang imellem til fester	Ja - Teknologi, byggeri og transport.		campus bornholm	0	0	0	1	0				15-25 minutter	18
Kvinde	17	15	0	0	1	1	1	0		I nogen grad	I nogen grad	I høj grad	I høj grad	I nogen grad	I høj grad	I mindre grad	Slet ikke	I høj grad	I høj grad	I høj grad	I mindre grad	I høj grad	Meget gode	Gode	Meget gode	Gode	Meget gode	Nej	Spadserer, cykler eller har anden lettere motion mindst 4 timer om ugen (medregn også cykling/gang til skole)	God	Ja	Jeg klarer mig godt	I meget høj grad	Nej	Ja - Omsorg, sundhed og pædagogik		Sosu Fredericia-Vejle-Horsens	0	0	0	1	0				15-25 minutter	17
Mand	17	over 60	0	1	1	0	0	0																														0	0	1	0	0				45 - over 60 min	17
Mand	17	over 60	0	0	1	0	0	1	når vi har været på værksted	I nogen grad	I høj grad	I nogen grad	I nogen grad	Slet ikke	Slet ikke	Slet ikke	I nogen grad	I nogen grad	I høj grad	I nogen grad	I nogen grad	I nogen grad	Middel	Middel	Middel	Ved ikke	Ved ikke	Nej	Dyrker motionsidræt, løber eller lignende mindst 4 timer om ugen	Virkelig god	Ved ikke	Jeg klarer mig godt	I nogen grad	Nej	Ja - Teknologi, byggeri og transport.		Aarhus tech	0	0	0	1	0				45 - over 60 min	17
			0	0	0	0	0	0																														0	1	0	0	0
			0	0	0	0	0	0																														0	1	0	0	0
Mand	16	15	0	1	0	0	0	0		I høj grad	I nogen grad	I høj grad	I nogen grad	Slet ikke	I mindre grad	Slet ikke	Slet ikke	I høj grad	I nogen grad	I høj grad	I nogen grad	I mindre grad	Meget gode	Dårlige	Dårlige	Dårlige	Meget dårlige	Måske	Læser, ser fjernsyn eller har anden stillesiddende beskæftigelse	Nogenlunde	Ja	Jeg klarer mig middelt	I nogen grad	Nej	Ja - Teknologi, byggeri og transport.		Aarhus Tech	0	0	0	1	0				15-25 minutter	16
Mand	17	over 60	0	0	0	0	0	1	sidst på dagen	I nogen grad	I mindre grad	I mindre grad	I mindre grad	I mindre grad	I høj grad	I høj grad	I høj grad	I mindre grad	Slet ikke	I høj grad	I nogen grad	I høj grad	Middel	Middel	Middel	Meget dårlige	Middel	Ved ikke	Træner hårdt og dyrker konkurrenceidræt regelmæssigt og flere gange om ugen	Nogenlunde	Nej	Jeg klarer mig meget godt	I nogen grad	Ja en gang imellem til fester	Ja - Teknologi, byggeri og transport.		tech	0	0	0	1	0				45 - over 60 min	17
Mand	19	0	1	0	0	0	0	0		I nogen grad	I meget høj grad	Slet ikke	I nogen grad	I meget høj grad	I meget høj grad	I meget høj grad	I meget høj grad	Slet ikke	Slet ikke	I meget høj grad	I meget høj grad	I meget høj grad	Middel	Middel	Middel	Middel	Middel	Ja	Læser, ser fjernsyn eller har anden stillesiddende beskæftigelse	Dårlig	Ja	Jeg klarer mig godt	Slet ikke	Nej	Nej - jeg ved ikke hvilket hovedområde, jeg er tilknyttet (skriv gerne hvad din uddannelse hedder)	DATA.	EUC Syd	0	0	0	1	0				0-10 minutter	19
Kvinde	18	45	1	1	1	0	0	0		I høj grad	I meget høj grad	I nogen grad	I meget høj grad	I nogen grad	I nogen grad	Slet ikke	Slet ikke	I høj grad	I nogen grad	I nogen grad	I meget høj grad	I høj grad	Gode	Meget gode	Gode	Meget gode	Gode	Nej	Spadserer, cykler eller har anden lettere motion mindst 4 timer om ugen (medregn også cykling/gang til skole)	Dårlig	Ja	Jeg klarer mig godt	I meget høj grad	Ja, mere en 11 cigaretter om dagen	Ja - Omsorg, sundhed og pædagogik		Sosu aarhus	0	0	0	1	0				45 - over 60 min	18
Mand	16	35	0	0	0	0	1	0		I nogen grad	I mindre grad	I nogen grad	I mindre grad	I mindre grad	I høj grad	Slet ikke	I mindre grad	I nogen grad	I høj grad	I nogen grad	I høj grad	I høj grad	Gode	Gode	Gode	Meget dårlige	Gode	Nej	Læser, ser fjernsyn eller har anden stillesiddende beskæftigelse	God	Ved ikke	Jeg klarer mig godt	I nogen grad	Nej	Ja - Teknologi, byggeri og transport.		aarhus tech	0	0	0	1	0				30-40 minutter	16
Mand	17	15	0	0	1	0	0	0		I nogen grad	I høj grad	I høj grad	I meget høj grad	Slet ikke	I høj grad	Slet ikke	I mindre grad	I meget høj grad	I høj grad	I nogen grad	I nogen grad	I høj grad	Middel	Gode	Gode	Meget gode	Meget gode	Nej	Træner hårdt og dyrker konkurrenceidræt regelmæssigt og flere gange om ugen	God	Ja	Jeg klarer mig godt	I nogen grad	Nej	Ja - Teknologi, byggeri og transport.		campus Bornmholm	0	0	0	1	0				15-25 minutter	17
			0	0	0	0	0	0																														0	1	0	0	0
Kvinde	18	30	1	1	0	0	1	0		I meget høj grad	I meget høj grad	I meget høj grad	I meget høj grad	I meget høj grad	I høj grad	Slet ikke	Slet ikke	I meget høj grad	I meget høj grad	I meget høj grad	I meget høj grad	I meget høj grad	Meget gode	Meget gode	Gode	Meget gode	Meget gode	Nej	Dyrker motionsidræt, løber eller lignende mindst 4 timer om ugen	Virkelig god	Ja	Jeg klarer mig meget godt	I meget høj grad	ja, 1-5 cigaretter om dagen	Ja - Fødevarer, jordbrug og oplevelser		Aarhus Tech	0	0	0	1	0				30-40 minutter	18
			0	0	0	0	0	0																														0	1	0	0	0
Mand	18	30	0	0	1	0	0	0		I meget høj grad	I meget høj grad	I meget høj grad	I nogen grad	I meget høj grad	I meget høj grad	Ved ikke	Slet ikke	I meget høj grad	I mindre grad	I høj grad	I høj grad	I meget høj grad	Meget gode	Meget gode	Gode	Meget gode	Gode	Nej	Dyrker motionsidræt, løber eller lignende mindst 4 timer om ugen	Nogenlunde	Ja	Jeg klarer mig middelt	I høj grad	Nej	Ja - Teknologi, byggeri og transport.		SkiveTS	0	0	0	1	0				30-40 minutter	18
			0	0	0	0	0	0																														0	1	0	0	0
			0	0	0	0	0	0																														0	1	0	0	0
			0	0	0	0	0	0																														0	1	0	0	0
			0	0	0	0	0	0																														0	1	0	0	0
			0	0	0	0	0	0																														0	1	0	0	0
Kvinde	16	5	1	0	1	0	0	0		I nogen grad	Slet ikke	Ved ikke	Slet ikke	Slet ikke	I mindre grad	I nogen grad	I nogen grad	I mindre grad	I nogen grad	I nogen grad	I meget høj grad	I mindre grad	Middel	Gode	Dårlige	Middel	Dårlige	Nej	Læser, ser fjernsyn eller har anden stillesiddende beskæftigelse	God	Ja	Jeg klarer mig godt	I høj grad	ja, 1-5 cigaretter om dagen	Ja - Omsorg, sundhed og pædagogik		SOSU Horsens	0	0	0	1	0				0-10 minutter	16
			0	0	0	0	0	0																														0	1	0	0	0
Mand	18	10	0	0	1	0	0	0		I høj grad	I nogen grad	I høj grad	I høj grad	I mindre grad	I mindre grad	I mindre grad	Ved ikke	I høj grad	I høj grad	I meget høj grad	I høj grad	I nogen grad	Meget gode	Meget gode	Gode	Meget gode	Gode	Ved ikke	Træner hårdt og dyrker konkurrenceidræt regelmæssigt og flere gange om ugen	Nogenlunde	Ved ikke	Jeg klarer mig godt	I høj grad	Ja en gang imellem til fester	Ja - Omsorg, sundhed og pædagogik		Sosu	0	0	0	1	0				0-10 minutter	18
			0	0	0	0	0	0																														0	1	0	0	0
Mand	17	50	0	0	1	0	0	0		I nogen grad	I mindre grad	I mindre grad	I mindre grad	I mindre grad	I nogen grad	I nogen grad	I høj grad	I nogen grad	I nogen grad	I nogen grad	I høj grad	I mindre grad	Middel	Middel	Dårlige	Middel	Dårlige	Ja	Spadserer, cykler eller har anden lettere motion mindst 4 timer om ugen (medregn også cykling/gang til skole)	Nogenlunde	Nej	Jeg klarer mig meget godt	I nogen grad	Nej	Ja - Teknologi, byggeri og transport.		CAMPUS BORNHOLM	0	0	0	1	0				45 - over 60 min	17
Kvinde	17	30	0	1	0	0	0	0		I meget høj grad	I mindre grad	I meget høj grad	I meget høj grad	I nogen grad	I meget høj grad	I mindre grad	I meget høj grad	I meget høj grad	I meget høj grad	I høj grad	I meget høj grad	I nogen grad	Middel	Gode	Middel	Meget gode	Meget gode	Nej	Læser, ser fjernsyn eller har anden stillesiddende beskæftigelse	Nogenlunde	Ja	Jeg klarer mig godt	I meget høj grad	Nej	Ja - Omsorg, sundhed og pædagogik		SOSU Esbjerg	0	0	0	1	0				30-40 minutter	17
Kvinde	17	40	0	1	1	1	0	0		I nogen grad	I meget høj grad	I meget høj grad	I meget høj grad	I høj grad	I nogen grad	Slet ikke	Slet ikke	I høj grad	I høj grad	I høj grad	I mindre grad	I høj grad	Meget gode	Gode	Gode	Meget gode	Middel	Måske	Læser, ser fjernsyn eller har anden stillesiddende beskæftigelse	God	Ja	Jeg klarer mig ikke så godt	I meget høj grad	ja, 6-10 cigaretter om dagen	Ja - Omsorg, sundhed og pædagogik		Social - og sundhedsskolen Århus	0	0	0	1	0				30-40 minutter	17
Mand	17	30	0	0	1	0	0	0		I meget høj grad	I høj grad	I høj grad	I høj grad	I meget høj grad	I høj grad	Slet ikke	Slet ikke	I meget høj grad	I høj grad	I høj grad	I nogen grad	I høj grad	Meget gode	Meget gode	Meget gode	Gode	Meget gode	Nej	Dyrker motionsidræt, løber eller lignende mindst 4 timer om ugen	God	Ja	Jeg klarer mig godt	I meget høj grad	ja, 6-10 cigaretter om dagen	Ja - Omsorg, sundhed og pædagogik		Sosu Århus	0	0	0	1	0				30-40 minutter	17
Kvinde	17	10	0	0	0	1	0	0		I høj grad	I høj grad	I høj grad	I meget høj grad	I høj grad	I høj grad	Slet ikke	Slet ikke	I meget høj grad																				0	0	1	0	0				0-10 minutter	17
			0	0	0	0	0	0																														0	1	0	0	0
Kvinde	16	5	0	0	1	0	0	0		I høj grad	I nogen grad	I nogen grad	I meget høj grad	I nogen grad	I høj grad	I mindre grad	I nogen grad	I høj grad	I nogen grad	I meget høj grad	I mindre grad	I høj grad	Gode	Gode	Gode	Middel	Meget dårlige	Ja	Spadserer, cykler eller har anden lettere motion mindst 4 timer om ugen (medregn også cykling/gang til skole)	Nogenlunde	Ved ikke	Jeg klarer mig godt	I nogen grad	Nej	Ja - Omsorg, sundhed og pædagogik		Horsens Social og Sundheds skolen	0	0	0	1	0				0-10 minutter	16
Mand	19	25	0	0	1	0	1	0		I nogen grad	I nogen grad	I mindre grad	I nogen grad	I nogen grad	I nogen grad	Slet ikke	Slet ikke	I meget høj grad	I nogen grad	I meget høj grad	I nogen grad	I høj grad	Middel	Ved ikke	Middel	Middel	Ved ikke	Nej	Spadserer, cykler eller har anden lettere motion mindst 4 timer om ugen (medregn også cykling/gang til skole)	Mindre god	Ja	Jeg klarer mig middelt	I nogen grad	Nej	Ja - Teknologi, byggeri og transport.		campus bornholm	0	0	0	1	0				15-25 minutter	19
Kvinde	16	45	1	0	1	0	0	1	Morgen og eftermiddags aktivitet	I nogen grad	I høj grad	I nogen grad	I nogen grad	I nogen grad	I nogen grad	I mindre grad	I mindre grad	I høj grad	I nogen grad	I høj grad	I nogen grad	I nogen grad	Gode	Gode	Gode	Meget gode	Meget gode	Nej	Spadserer, cykler eller har anden lettere motion mindst 4 timer om ugen (medregn også cykling/gang til skole)									0	0	1	0	0				45 - over 60 min	16
Mand	17	over 60	0	1	1	1	1	0		Slet ikke	I høj grad	I nogen grad	I nogen grad	I nogen grad	I nogen grad	Slet ikke	Slet ikke	I nogen grad	I høj grad	I mindre grad	I høj grad	I nogen grad	Gode	Gode	Gode	Gode	Gode	Nej	Træner hårdt og dyrker konkurrenceidræt regelmæssigt og flere gange om ugen	God	Ja	Jeg klarer mig godt	I nogen grad	Nej	Ja - Omsorg, sundhed og pædagogik		Sosu vejle	0	0	0	1	0				45 - over 60 min	17
Kvinde	17	35	0	1	1	0	0	0		I nogen grad	I nogen grad	I nogen grad	I nogen grad	I nogen grad	I nogen grad	I nogen grad	I nogen grad	I nogen grad	I høj grad	Slet ikke	I nogen grad	I mindre grad	Meget dårlige	Ved ikke	Ved ikke	Ved ikke	Ved ikke	Nej	Spadserer, cykler eller har anden lettere motion mindst 4 timer om ugen (medregn også cykling/gang til skole)	God	Nej	Jeg klarer mig meget godt	I mindre grad	Ja en gang imellem til fester	Nej - jeg ved ikke hvilket hovedområde, jeg er tilknyttet (skriv gerne hvad din uddannelse hedder)	SKskk	LAlala	0	0	0	1	0				30-40 minutter	17
			0	0	0	0	0	0																														0	1	0	0	0
Kvinde	17	20	1	1	0	1	0	0		I nogen grad	I mindre grad	I mindre grad	Slet ikke	Slet ikke	I nogen grad	I nogen grad	Slet ikke	I mindre grad	I mindre grad	I mindre grad	I høj grad	I nogen grad	Middel	Middel	Middel	Ved ikke	Ved ikke	Ved ikke	Træner hårdt og dyrker konkurrenceidræt regelmæssigt og flere gange om ugen	God	Ved ikke	Jeg klarer mig meget godt	I høj grad	Nej	Ja - Omsorg, sundhed og pædagogik		SOSU Fyn Syd	0	0	0	1	0				15-25 minutter	17
Mand	17	15	0	0	1	0	0	0		I høj grad	I høj grad	I høj grad	I høj grad	I høj grad	I høj grad	I høj grad	I høj grad	I høj grad	I nogen grad	I nogen grad	I nogen grad	I høj grad	Middel	Middel	Middel	Middel	Middel	Ja	Læser, ser fjernsyn eller har anden stillesiddende beskæftigelse	Virkelig god	Ved ikke	Jeg klarer mig meget godt	I meget høj grad	Ja, mere en 11 cigaretter om dagen	Ja - Teknologi, byggeri og transport.		rønne	0	0	0	1	0				15-25 minutter	17
Kvinde	17	45	0	0	1	0	0	0		I meget høj grad	Ved ikke	Ved ikke	Ved ikke	Ved ikke	I nogen grad	Slet ikke	Ved ikke	I meget høj grad	Ved ikke	Ved ikke	I nogen grad	I meget høj grad	Meget dårlige	Gode	Middel	Middel	Gode	Nej	Læser, ser fjernsyn eller har anden stillesiddende beskæftigelse	Nogenlunde	Ved ikke	Jeg klarer mig middelt	I nogen grad	Nej	Ja - Teknologi, byggeri og transport.		Campus Bornholm	0	0	0	1	0				45 - over 60 min	17
Mand	16	0	1	0	0	0	0	0		I nogen grad	I nogen grad	I nogen grad	I nogen grad	I nogen grad	I høj grad	I mindre grad	Slet ikke	I nogen grad	I nogen grad	I nogen grad	I meget høj grad	I høj grad	Dårlige	Gode	Middel	Meget dårlige	Meget dårlige	Måske	Spadserer, cykler eller har anden lettere motion mindst 4 timer om ugen (medregn også cykling/gang til skole)	Mindre god	Ja	Jeg klarer mig meget godt	I høj grad	Ja en gang imellem til fester	Ja - Teknologi, byggeri og transport.		EUC NVS	0	0	0	1	0				0-10 minutter	16
			0	0	0	0	0	0																														0	1	0	0	0
Kvinde	18	20	0	0	0	0	1	0		Ved ikke	I mindre grad	I nogen grad	I mindre grad	I mindre grad	I nogen grad	I høj grad	I mindre grad	Ved ikke	I mindre grad	I mindre grad	I mindre grad	I nogen grad	Middel	Ved ikke	Middel	Ved ikke	Ved ikke	Ja	Dyrker motionsidræt, løber eller lignende mindst 4 timer om ugen	Virkelig god	Ja	Jeg klarer mig meget godt	I mindre grad	Nej	Ja - Fødevarer, jordbrug og oplevelser		Aarhus Tech	0	0	0	1	0				15-25 minutter	18
Kvinde	17	20	0	1	0	0	0	0		I nogen grad	I nogen grad	I nogen grad	I nogen grad	I høj grad	I nogen grad	I mindre grad	I mindre grad	I meget høj grad	I høj grad	I nogen grad	I nogen grad	I høj grad	Gode	Meget gode	Gode	Meget gode	Gode	Ved ikke	Dyrker motionsidræt, løber eller lignende mindst 4 timer om ugen	Nogenlunde	Ja	Jeg klarer mig godt	I nogen grad	Nej	Ja - Omsorg, sundhed og pædagogik		Sosu Aarhus	0	0	0	1	0				15-25 minutter	17
Kvinde	17	20	1	1	1	0	0	0		I nogen grad	I nogen grad	I nogen grad	I høj grad	I nogen grad	I høj grad	Slet ikke	I mindre grad	I meget høj grad	I meget høj grad	I meget høj grad	I høj grad	I høj grad	Middel	Dårlige	Middel	Middel	Middel	Nej	Træner hårdt og dyrker konkurrenceidræt regelmæssigt og flere gange om ugen	God	Ja	Jeg klarer mig godt	I høj grad	Ja en gang imellem til fester	Ja - Omsorg, sundhed og pædagogik		sosu horsens	0	0	0	1	0				15-25 minutter	17
Mand	18	45	0	0	1	0	0	1	når vi er på værkstedet	I nogen grad	I nogen grad	I høj grad	I nogen grad	I høj grad	I høj grad	I høj grad	I nogen grad	I nogen grad	I nogen grad	I høj grad	I høj grad	I mindre grad	Gode	Middel	Middel	Gode	Middel	Nej	Dyrker motionsidræt, løber eller lignende mindst 4 timer om ugen	Nogenlunde	Ja	Jeg klarer mig godt	I høj grad	ja, 1-5 cigaretter om dagen	Ja - Teknologi, byggeri og transport.		EUC nordvestsjælland	0	0	0	1	0				45 - over 60 min	18
Mand	17	5	1	1	1	0	0	0		Ved ikke	Ved ikke	Ved ikke	I nogen grad	Ved ikke	Ved ikke	Ved ikke	Ved ikke	I nogen grad	I nogen grad	I nogen grad	I nogen grad	I nogen grad	Middel	Middel	Middel	Ved ikke	Middel	Nej	Læser, ser fjernsyn eller har anden stillesiddende beskæftigelse	Mindre god	Ja	Jeg klarer mig godt	Slet ikke	Ja, mere en 11 cigaretter om dagen	Ja - Teknologi, byggeri og transport.		holbæk euc	0	0	0	1	0				0-10 minutter	17
Mand	18	5	0	0	1	0	0	0		I nogen grad	I mindre grad	I mindre grad	I mindre grad	I mindre grad	I nogen grad	I mindre grad	I mindre grad	I nogen grad	I nogen grad	I nogen grad	I nogen grad	I mindre grad	Ved ikke	Middel	Middel	Dårlige	Ved ikke	Nej	Læser, ser fjernsyn eller har anden stillesiddende beskæftigelse	God	Ved ikke	Jeg klarer mig meget godt	I høj grad	Nej	Ja - Teknologi, byggeri og transport.		Aarhus tech	0	0	0	1	0				0-10 minutter	18
			0	0	0	0	0	0																														0	1	0	0	0
			0	0	0	0	0	0																														0	1	0	0	0
Mand	17	55	0	0	1	0	0	0		I meget høj grad	I høj grad	I meget høj grad	I mindre grad	I meget høj grad	I meget høj grad	Slet ikke	Slet ikke	I meget høj grad	I meget høj grad	I høj grad	I meget høj grad	I meget høj grad	Meget gode	Meget gode	Meget gode	Meget gode	Meget gode	Nej	Dyrker motionsidræt, løber eller lignende mindst 4 timer om ugen	God	Ja	Jeg klarer mig godt	I meget høj grad	Nej	Ja - Omsorg, sundhed og pædagogik		Sosu	0	0	0	1	0				45 - over 60 min	17
			0	0	0	0	0	0																														0	1	0	0	0
Kvinde	16	35	1	1	1	1	0	0		I høj grad	I nogen grad	I nogen grad	I meget høj grad	I meget høj grad	I meget høj grad	Slet ikke	Slet ikke	I meget høj grad	I høj grad	I høj grad	I høj grad	I meget høj grad	Gode	Meget gode	Meget gode	Meget gode	Meget gode	Nej	Spadserer, cykler eller har anden lettere motion mindst 4 timer om ugen (medregn også cykling/gang til skole)	God	Ja	Jeg klarer mig godt	I meget høj grad	ja, 6-10 cigaretter om dagen	Ja - Omsorg, sundhed og pædagogik		Aarhus sosu	0	0	0	1	0				30-40 minutter	16
			0	0	0	0	0	0																														0	1	0	0	0
Mand	17	5	0	0	0	1	0	0		I høj grad	I nogen grad	I mindre grad	I nogen grad	I nogen grad	I høj grad	Slet ikke	Ved ikke	I nogen grad	I nogen grad	I mindre grad	I nogen grad	I nogen grad	Middel	Middel	Dårlige	Ved ikke	Middel	Måske	Træner hårdt og dyrker konkurrenceidræt regelmæssigt og flere gange om ugen	Nogenlunde	Ja	Jeg klarer mig godt	I høj grad	ja, 6-10 cigaretter om dagen	Ja - Teknologi, byggeri og transport.		celf nykøbing f	0	0	0	1	0				0-10 minutter	17
Mand	17	0	1	0	0	0	0	0		Ved ikke	I høj grad	I nogen grad	I meget høj grad	I nogen grad	I høj grad	Slet ikke	Ved ikke	I høj grad	Ved ikke	Ved ikke	Ved ikke	Ved ikke	Ved ikke	Dårlige	Ved ikke	Ved ikke	Ved ikke	Nej	Dyrker motionsidræt, løber eller lignende mindst 4 timer om ugen	God	Ja	Jeg klarer mig godt	I høj grad	Nej	Ja - Teknologi, byggeri og transport.		Aarhus tech	0	0	0	1	0				0-10 minutter	17
Kvinde	17	30	0	1	1	0	1	0		I nogen grad	I nogen grad	I nogen grad	I høj grad	I mindre grad	I nogen grad	I mindre grad	I mindre grad	I høj grad	I nogen grad	I høj grad	I høj grad	I nogen grad	Gode	Middel	Middel	Middel	Middel	Nej	Spadserer, cykler eller har anden lettere motion mindst 4 timer om ugen (medregn også cykling/gang til skole)	Nogenlunde	Ja	Jeg klarer mig middelt	I nogen grad	Nej	Ja - Omsorg, sundhed og pædagogik		Social og sundhedsskolen, EUX Randers	0	0	0	1	0				30-40 minutter	17
Kvinde	16	45	0	1	1	0	0	0		I høj grad	I meget høj grad	I høj grad	I høj grad	I høj grad	I høj grad	I mindre grad	I mindre grad	I meget høj grad	I høj grad	I meget høj grad	I meget høj grad	I høj grad	Gode	Meget gode	Gode	Gode	Meget gode	Nej	Spadserer, cykler eller har anden lettere motion mindst 4 timer om ugen (medregn også cykling/gang til skole)	Nogenlunde	Ja	Jeg klarer mig godt	I nogen grad	ja, 6-10 cigaretter om dagen	Ja - Omsorg, sundhed og pædagogik		Sosu Aarhus / Ioos	0	0	0	1	0				45 - over 60 min	16
			0	0	0	0	0	0																														0	1	0	0	0
Kvinde	17	45	0	0	1	0	1	0		I nogen grad	I nogen grad	I nogen grad	I nogen grad	I høj grad	I nogen grad	I mindre grad	I mindre grad	I nogen grad	I høj grad	I nogen grad	I høj grad	I nogen grad	Gode	Gode	Gode	Gode	Meget gode	Nej	Spadserer, cykler eller har anden lettere motion mindst 4 timer om ugen (medregn også cykling/gang til skole)	Mindre god	Nej	Jeg klarer mig godt	I høj grad	ja, 6-10 cigaretter om dagen	Ja - Omsorg, sundhed og pædagogik		Sosu århus	0	0	0	1	0				45 - over 60 min	17
Mand	17	20	0	0	0	1	0	0		I nogen grad	I nogen grad	I nogen grad	I meget høj grad	I mindre grad	I meget høj grad	Slet ikke	I nogen grad	I nogen grad	I høj grad	I høj grad	I høj grad	I høj grad	Middel	Middel	Gode	Ved ikke	Ved ikke	Nej	Træner hårdt og dyrker konkurrenceidræt regelmæssigt og flere gange om ugen	God	Ja	Jeg klarer mig godt	I høj grad	Nej	Ja - Teknologi, byggeri og transport.		EUC Nordvestsjælland	0	0	0	1	0				15-25 minutter	17
Kvinde	18	20	0	0	1	1	0	0		I nogen grad	I nogen grad	Slet ikke	I mindre grad	I nogen grad	I nogen grad	I meget høj grad	Slet ikke	I mindre grad	I høj grad	I nogen grad	I nogen grad	I nogen grad	Gode	Meget dårlige	Middel	Meget dårlige	Meget dårlige	Måske	Spadserer, cykler eller har anden lettere motion mindst 4 timer om ugen (medregn også cykling/gang til skole)	Mindre god	Nej	Jeg klarer mig godt	I meget høj grad	Nej	Ja - Omsorg, sundhed og pædagogik		Aarhus tech	0	0	0	1	0				15-25 minutter	18
Kvinde	16	30	0	0	1	0	0	1	Morgen og eftermiddags aktivitet	I høj grad	I høj grad	I høj grad	I høj grad	I nogen grad	I høj grad	Slet ikke	I mindre grad	I meget høj grad	I nogen grad	I høj grad	I nogen grad	I mindre grad	Gode	Middel	Gode	Gode	Middel	Nej	Spadserer, cykler eller har anden lettere motion mindst 4 timer om ugen (medregn også cykling/gang til skole)	Nogenlunde	Ja	Jeg klarer mig middelt						0	0	1	0	0				30-40 minutter	16
Kvinde	17	15	0	1	1	0	0	0		I nogen grad	I nogen grad	I nogen grad	I høj grad	I mindre grad	I høj grad	Slet ikke	Slet ikke	I høj grad	I nogen grad	I nogen grad	I høj grad	I nogen grad	Gode	Gode	Gode	Middel	Gode	Ved ikke	Spadserer, cykler eller har anden lettere motion mindst 4 timer om ugen (medregn også cykling/gang til skole)	God	Ja	Jeg klarer mig godt	I meget høj grad	Nej	Ja - Omsorg, sundhed og pædagogik		Social og Sundhedsskolen Aarhus	0	0	0	1	0				15-25 minutter	17
Kvinde	17	20	0	0	1	0	0	0		I nogen grad	I høj grad	I mindre grad	I nogen grad	I nogen grad	I høj grad	I nogen grad	I høj grad	I nogen grad	I nogen grad	I nogen grad	Slet ikke	I nogen grad	Middel	Middel	Middel	Ved ikke	Ved ikke	Nej	Dyrker motionsidræt, løber eller lignende mindst 4 timer om ugen	God	Nej	Jeg klarer mig godt	I nogen grad	Ja en gang imellem til fester	Ja - Teknologi, byggeri og transport.		Aarhus tech	0	0	0	1	0				15-25 minutter	17
Kvinde	17	20	0	1	0	0	0	0																														0	0	1	0	0				15-25 minutter	17
Mand	19	45	0	0	1	1	0	0		I meget høj grad	I meget høj grad	I meget høj grad	I meget høj grad	I meget høj grad	I meget høj grad	Slet ikke	Slet ikke	I meget høj grad	I meget høj grad	I meget høj grad	I høj grad	I meget høj grad	Meget gode	Meget gode	Meget gode	Meget gode	Meget gode	Nej	Træner hårdt og dyrker konkurrenceidræt regelmæssigt og flere gange om ugen	Virkelig god	Ja	Jeg klarer mig meget godt	I meget høj grad	Nej	Ja - Omsorg, sundhed og pædagogik		SOSU Aarhus	0	0	0	1	0				45 - over 60 min	19
Mand	17	20	1	1	1	1	0	0		I nogen grad	I nogen grad	I høj grad	I høj grad	I nogen grad	I høj grad	Slet ikke	Slet ikke	I høj grad	I nogen grad	I nogen grad	I nogen grad	I nogen grad	Middel	Gode	Gode	Gode	Middel	Nej	Læser, ser fjernsyn eller har anden stillesiddende beskæftigelse	Mindre god	Ved ikke	Jeg klarer mig middelt	I høj grad	Ja, mere en 11 cigaretter om dagen	Ja - Teknologi, byggeri og transport.		EUC Nordvest sjælland Holbæk	0	0	0	1	0				15-25 minutter	17
Mand	17	over 60	0	0	1	0	0	0		I nogen grad	Slet ikke	Slet ikke	I nogen grad	Ved ikke	I høj grad	Slet ikke	I nogen grad	I nogen grad	I høj grad	I mindre grad	I høj grad	I meget høj grad	Middel	Gode	Dårlige	Meget dårlige	Dårlige	Nej	Spadserer, cykler eller har anden lettere motion mindst 4 timer om ugen (medregn også cykling/gang til skole)	God	Nej	Jeg klarer mig middelt	I nogen grad	Nej	Ja - Fødevarer, jordbrug og oplevelser		Aalborg food college	0	0	0	1	0				45 - over 60 min	17
Mand	17	45	1	1	0	0	1	0		I høj grad	I høj grad	I nogen grad	I høj grad	I nogen grad	I nogen grad	Slet ikke	I mindre grad	I nogen grad	I nogen grad	I nogen grad	I høj grad	I nogen grad	Middel	Middel	Middel	Middel	Middel	Nej	Dyrker motionsidræt, løber eller lignende mindst 4 timer om ugen	Virkelig god	Ja							0	0	1	0	0				45 - over 60 min	17
Mand	16	40	1	0	0	1	0	0		I nogen grad	I høj grad	I nogen grad	I høj grad	I nogen grad	I meget høj grad	Slet ikke	I nogen grad	I høj grad	I nogen grad	I høj grad	I høj grad	I høj grad	Gode	Gode	Gode	Middel	Middel	Måske	Spadserer, cykler eller har anden lettere motion mindst 4 timer om ugen (medregn også cykling/gang til skole)	God	Ved ikke	Jeg klarer mig meget godt	I høj grad	Nej	Ja - Teknologi, byggeri og transport.		Euc Nordvestsjælland	0	0	0	1	0				30-40 minutter	16
Mand	17	40	0	0	0	1	0	1	at gå rundt i værkstedet	Ved ikke	Ved ikke	Slet ikke	Slet ikke	Slet ikke	I mindre grad	I nogen grad	I høj grad	Ved ikke	Ved ikke	Ved ikke	Ved ikke	I nogen grad	Ved ikke	Ved ikke	Ved ikke	Ved ikke	Ved ikke	Nej	Træner hårdt og dyrker konkurrenceidræt regelmæssigt og flere gange om ugen	Mindre god	Nej	Jeg klarer mig godt	I nogen grad	ja, 6-10 cigaretter om dagen	Ja - Teknologi, byggeri og transport.		EUC Syd Sønderborg	0	0	0	1	0				30-40 minutter	17
Kvinde	16	40	0	0	1	1	0	1	Et breake	I nogen grad	I høj grad	I høj grad	I høj grad	I nogen grad	I høj grad	Slet ikke	Slet ikke	I høj grad	I høj grad	I høj grad	I høj grad	I høj grad	Gode	Middel	Gode	Gode	Middel	Nej	Spadserer, cykler eller har anden lettere motion mindst 4 timer om ugen (medregn også cykling/gang til skole)	God	Ja	Jeg klarer mig godt	I høj grad	ja, 6-10 cigaretter om dagen	Ja - Omsorg, sundhed og pædagogik		Sosu Herning	0	0	0	1	0				30-40 minutter	16
Kvinde	17	45	0	0	1	0	0	1	Til morgen og eftermiddags aktivitet	I høj grad	I høj grad	I høj grad	I høj grad	I mindre grad	I nogen grad	Slet ikke	Slet ikke	I nogen grad	I nogen grad	I meget høj grad	I meget høj grad	I nogen grad	Middel	Gode	Middel	Meget gode	Middel	Nej	Spadserer, cykler eller har anden lettere motion mindst 4 timer om ugen (medregn også cykling/gang til skole)	Mindre god	Ja	Jeg klarer mig ikke så godt	I høj grad	ja, 1-5 cigaretter om dagen	Ja - Omsorg, sundhed og pædagogik		SOSU Aarhus	0	0	0	1	0				45 - over 60 min	17
Kvinde	17	10	0	0	0	0	0	1	Vi har haft få idrætsdage og de første 3-4 uger lavede vi nogle små breaks.	I nogen grad	I meget høj grad	I nogen grad	I meget høj grad	I nogen grad	I meget høj grad	Slet ikke	I høj grad	I meget høj grad	I meget høj grad	I nogen grad	I høj grad	I nogen grad	Meget gode	Middel	Gode	Ved ikke	Ved ikke	Nej	Dyrker motionsidræt, løber eller lignende mindst 4 timer om ugen	God	Ja	Jeg klarer mig meget godt	I meget høj grad	Nej	Nej - jeg ved ikke hvilket hovedområde, jeg er tilknyttet (skriv gerne hvad din uddannelse hedder)	Tror det er Omsorg, sundhed og pædagogik, Mediegrafiker.	Aarhus Tech Dollerupvej	0	0	0	1	0				0-10 minutter	17
Mand	18	25	1	0	1	0	0	0		I høj grad	I nogen grad	I nogen grad	I nogen grad	I mindre grad	I høj grad	Slet ikke	I høj grad	I høj grad	I mindre grad	I mindre grad	I meget høj grad	I meget høj grad	Meget gode	Meget gode	Meget gode	Meget gode	Meget gode	Nej	Træner hårdt og dyrker konkurrenceidræt regelmæssigt og flere gange om ugen	Virkelig god	Ja	Jeg klarer mig godt	I høj grad	Nej	Ja - Omsorg, sundhed og pædagogik		SOSU AARHUS	0	0	0	1	0				15-25 minutter	18
Kvinde	17	30	1	0	1	0	0	1	Hvis lærende synes vi ikke kan mere	I høj grad	I høj grad	I høj grad	I høj grad	Slet ikke	I høj grad	I mindre grad	I mindre grad	I høj grad	I nogen grad	I høj grad	I høj grad	I mindre grad	Meget gode	Middel	Middel	Gode	Gode	Ved ikke	Læser, ser fjernsyn eller har anden stillesiddende beskæftigelse	Mindre god	Ja	Jeg klarer mig ikke så godt	I meget høj grad	Ja en gang imellem til fester	Ja - Omsorg, sundhed og pædagogik		Sosu Aarhus	0	0	0	1	0				30-40 minutter	17
			0	0	0	0	0	0																														0	1	0	0	0
Mand	17	5	0	1	0	0	0	0		I meget høj grad	I høj grad	I nogen grad	I meget høj grad	I mindre grad	I nogen grad	Slet ikke	I mindre grad	I meget høj grad	I høj grad	I høj grad	I høj grad	I høj grad	Middel	Middel	Gode	Dårlige	Gode	Nej	Træner hårdt og dyrker konkurrenceidræt regelmæssigt og flere gange om ugen	God	Ja	Jeg klarer mig godt	I nogen grad	Nej	Ja - Fødevarer, jordbrug og oplevelser		Aarhus tech	0	0	0	1	0				0-10 minutter	17
Kvinde	16	45	0	0	1	0	0	0		I meget høj grad	I meget høj grad	I høj grad	I meget høj grad	I mindre grad	I mindre grad	I mindre grad	Slet ikke	I meget høj grad	I meget høj grad	I høj grad	I høj grad	I høj grad	Gode	Gode	Gode	Gode	Gode	Måske	Læser, ser fjernsyn eller har anden stillesiddende beskæftigelse	Dårlig	Ved ikke	Jeg klarer mig middelt	I høj grad	ja, 1-5 cigaretter om dagen	Ja - Omsorg, sundhed og pædagogik		Aarhus	0	0	0	1	0				45 - over 60 min	16
Kvinde	17	45	0	1	0	0	0	0		I høj grad	I høj grad	I nogen grad	I meget høj grad	Ved ikke	I mindre grad	I nogen grad	Slet ikke	I meget høj grad	I høj grad	I høj grad	I nogen grad	I nogen grad	Middel	Gode	Gode	Ved ikke	Ved ikke	Nej	Spadserer, cykler eller har anden lettere motion mindst 4 timer om ugen (medregn også cykling/gang til skole)	Nogenlunde	Ja	Jeg klarer mig godt	I høj grad	Nej	Ja - Fødevarer, jordbrug og oplevelser		Aarhus tech	0	0	0	1	0				45 - over 60 min	17
Kvinde	18	20	1	1	0	0	0	0		I meget høj grad	I nogen grad	I nogen grad	I meget høj grad	I nogen grad	I meget høj grad	Slet ikke	Ved ikke	I meget høj grad	Ved ikke	I høj grad	I høj grad	I høj grad	Gode	Ved ikke	Gode	Ved ikke	Ved ikke	Nej	Træner hårdt og dyrker konkurrenceidræt regelmæssigt og flere gange om ugen	God	Ja	Jeg klarer mig meget godt	I meget høj grad	Nej	Ja - Omsorg, sundhed og pædagogik		Aarhus tech	0	0	0	1	0				15-25 minutter	18
Kvinde	17	10	0	0	0	0	1	0		I nogen grad	I nogen grad	I nogen grad	I meget høj grad	I mindre grad	Slet ikke	I mindre grad	I mindre grad	I høj grad	I nogen grad	I nogen grad	I nogen grad	I mindre grad	Dårlige	Gode	Middel	Ved ikke	Middel	Ved ikke	Spadserer, cykler eller har anden lettere motion mindst 4 timer om ugen (medregn også cykling/gang til skole)									0	0	1	0	0				0-10 minutter	17
Mand	17	40	0	0	0	0	1	0		I høj grad	I høj grad	I høj grad	I nogen grad	Slet ikke	I meget høj grad	Slet ikke	Slet ikke	I meget høj grad	I meget høj grad	I meget høj grad	I meget høj grad	Slet ikke	Meget dårlige	Dårlige	Meget gode	Meget dårlige	Meget gode	Nej	Læser, ser fjernsyn eller har anden stillesiddende beskæftigelse	God	Ja	Jeg klarer mig godt	I meget høj grad	Nej	Ja - Fødevarer, jordbrug og oplevelser		Aarhustech	0	0	0	1	0				30-40 minutter	17
Mand	13	5	0	0	0	1	0	0		I meget høj grad	I meget høj grad	I meget høj grad	I meget høj grad	I meget høj grad	I meget høj grad	Slet ikke	Ved ikke	I meget høj grad	I høj grad	I høj grad	I høj grad	I høj grad	Middel	Middel	Middel	Middel	Middel	Ja	Læser, ser fjernsyn eller har anden stillesiddende beskæftigelse	God	Ja	Jeg klarer mig middelt	Slet ikke	Ja, mere en 11 cigaretter om dagen	Ja - Omsorg, sundhed og pædagogik		SOSU aarhus	0	0	0	1	0				0-10 minutter
Mand	18	20	1	0	0	1	1	0		I høj grad	I nogen grad	I nogen grad	I nogen grad	I nogen grad	I meget høj grad	I mindre grad	I mindre grad	I nogen grad	I nogen grad	I høj grad	I mindre grad	I høj grad	Middel	Gode	Middel	Middel	Dårlige	Måske	Spadserer, cykler eller har anden lettere motion mindst 4 timer om ugen (medregn også cykling/gang til skole)	Nogenlunde	Nej	Jeg klarer mig middelt	I høj grad	ja, 6-10 cigaretter om dagen	Ja - Teknologi, byggeri og transport.		Campus Bornholm	0	0	0	1	0				15-25 minutter	18
			0	0	0	0	0	0																														0	1	0	0	0
			0	0	0	0	0	0																														0	1	0	0	0
Mand	19	15	0	1	1	1	0	0		I meget høj grad	I meget høj grad	I meget høj grad	I høj grad	I høj grad	I meget høj grad	Ved ikke	Ved ikke	I meget høj grad	I meget høj grad	I meget høj grad	I meget høj grad	I meget høj grad	Gode	Meget gode	Meget gode	Meget gode	Meget gode	Nej	Dyrker motionsidræt, løber eller lignende mindst 4 timer om ugen	Virkelig god	Ja	Jeg klarer mig godt	I nogen grad	Nej	Ja - Omsorg, sundhed og pædagogik		Sosu Aarhus	0	0	0	1	0				15-25 minutter	19
Kvinde	17	25	1	1	1	0	0	0		I meget høj grad	I meget høj grad	I meget høj grad	I meget høj grad	I nogen grad	I høj grad	Slet ikke	Slet ikke	I meget høj grad	I nogen grad	I meget høj grad	I høj grad	I høj grad	Meget gode	Meget gode	Meget gode	Meget gode	Gode	Nej	Spadserer, cykler eller har anden lettere motion mindst 4 timer om ugen (medregn også cykling/gang til skole)	Nogenlunde	Ja	Jeg klarer mig middelt	I høj grad	Ja en gang imellem til fester	Ja - Omsorg, sundhed og pædagogik		SOSU Århus	0	0	0	1	0				15-25 minutter	17
Mand	16	over 60	0	0	0	0	0	1	SLET IKKE DUDE	I meget høj grad	I meget høj grad	I nogen grad	I meget høj grad	Slet ikke	I meget høj grad	Slet ikke	I nogen grad	I høj grad	I mindre grad	Slet ikke	I meget høj grad	Slet ikke	Meget dårlige	Meget dårlige	Meget gode	Meget gode	Middel	Nej	Spadserer, cykler eller har anden lettere motion mindst 4 timer om ugen (medregn også cykling/gang til skole)	Virkelig god	Nej	Jeg klarer mig meget godt	I høj grad	Nej	Ja - Teknologi, byggeri og transport.		EUCNVS	0	0	0	1	0				45 - over 60 min	16
Mand	18	10	0	1	0	0	0	0		I høj grad	I nogen grad	Slet ikke	Slet ikke	I mindre grad	I høj grad	I nogen grad	Slet ikke	I mindre grad	I nogen grad	I høj grad	Slet ikke	I mindre grad	Middel	Gode	Meget dårlige	Middel	Meget dårlige	Måske	Spadserer, cykler eller har anden lettere motion mindst 4 timer om ugen (medregn også cykling/gang til skole)	Nogenlunde	Ved ikke	Jeg klarer mig middelt	I høj grad	Ja, mere en 11 cigaretter om dagen	Nej - jeg ved ikke hvilket hovedområde, jeg er tilknyttet (skriv gerne hvad din uddannelse hedder)	personvognsmekaniker	Aarhus tech	0	0	0	1	0				0-10 minutter	18
Kvinde	16	20	1	1	0	0	0	0		I høj grad	I mindre grad	I mindre grad	I høj grad	I mindre grad	I mindre grad	I mindre grad	Ved ikke	I meget høj grad	I nogen grad	I mindre grad	I høj grad	I mindre grad	Middel	Gode	Middel	Middel	Gode	Nej	Dyrker motionsidræt, løber eller lignende mindst 4 timer om ugen	God	Ved ikke	Jeg klarer mig middelt	I høj grad	Nej	Ja - Fødevarer, jordbrug og oplevelser		Aarhus tech	0	0	0	1	0				15-25 minutter	16
Kvinde	17	30	0	1	1	0	0	0		I meget høj grad	I nogen grad	I høj grad	I meget høj grad	I høj grad	I meget høj grad	Slet ikke	I nogen grad	I meget høj grad	I nogen grad	I høj grad	I høj grad	I høj grad	Meget gode	Gode	Meget gode	Meget gode	Meget gode	Nej	Dyrker motionsidræt, løber eller lignende mindst 4 timer om ugen	God	Ja	Jeg klarer mig godt	I nogen grad	Ja en gang imellem til fester	Ja - Omsorg, sundhed og pædagogik		Sosu	0	0	0	1	0				30-40 minutter	17
			0	0	0	0	0	0																														0	1	0	0	0
			0	0	0	0	0	0																														0	1	0	0	0
Kvinde	16	35	0	0	1	0	1	0		I høj grad	I høj grad	I høj grad	I høj grad	I mindre grad	I høj grad	Slet ikke	Ved ikke	I meget høj grad	I høj grad	I høj grad	I høj grad	I meget høj grad	Gode	Gode	Gode	Gode	Gode	Nej	Spadserer, cykler eller har anden lettere motion mindst 4 timer om ugen (medregn også cykling/gang til skole)	Nogenlunde	Ja	Jeg klarer mig middelt	I nogen grad	ja, 1-5 cigaretter om dagen	Ja - Omsorg, sundhed og pædagogik		Sosu Aarhus	0	0	0	1	0				30-40 minutter	16
			0	0	0	0	0	0																														0	1	0	0	0
			0	0	0	0	0	0																														0	1	0	0	0
			0	0	0	0	0	0																														0	1	0	0	0
Kvinde	18	45	0	1	1	0	0	0		I meget høj grad	I høj grad	I høj grad	I høj grad	I høj grad	I høj grad	Slet ikke	Slet ikke	I høj grad	I høj grad	I høj grad	I høj grad	I nogen grad	Gode	Gode	Gode	Gode	Gode	Ja	Læser, ser fjernsyn eller har anden stillesiddende beskæftigelse	Nogenlunde	Ja	Jeg klarer mig godt	I høj grad	Ja en gang imellem til fester	Ja - Omsorg, sundhed og pædagogik		Sosu Aarhus	0	0	0	1	0				45 - over 60 min	18
Mand	17	0	0	0	1	0	0	0		Slet ikke	Slet ikke	Slet ikke	I mindre grad	Slet ikke	Slet ikke	I meget høj grad	I høj grad	Slet ikke	Slet ikke	I mindre grad	Slet ikke	Slet ikke	Middel	Dårlige	Middel	Dårlige	Dårlige	Ja	Læser, ser fjernsyn eller har anden stillesiddende beskæftigelse	Virkelig god	Nej	Jeg klarer mig middelt	I mindre grad	Ja, mere en 11 cigaretter om dagen	Nej - jeg ved ikke hvilket hovedområde, jeg er tilknyttet (skriv gerne hvad din uddannelse hedder)	lastvognsmekaniker	capusbornholm	0	0	0	1	0				0-10 minutter	17
Kvinde	17	30	0	1	1	0	0	0		I høj grad	I meget høj grad	I meget høj grad	I meget høj grad	I nogen grad	I høj grad	Slet ikke	I nogen grad	I meget høj grad	I høj grad	I høj grad	I høj grad	I nogen grad	Middel	Gode	Middel	Gode	Gode	Nej	Spadserer, cykler eller har anden lettere motion mindst 4 timer om ugen (medregn også cykling/gang til skole)	Nogenlunde	Ja	Jeg klarer mig godt	I nogen grad	Ja en gang imellem til fester	Ja - Omsorg, sundhed og pædagogik		Sosu Århus	0	0	0	1	0				30-40 minutter	17
Kvinde	16	25	0	1	1	0	1	0		Slet ikke	I nogen grad	I høj grad	I mindre grad	I mindre grad	I høj grad	I høj grad	I mindre grad	I mindre grad	I nogen grad	I mindre grad	I nogen grad	I høj grad	Gode	Middel	Dårlige	Dårlige	Meget dårlige	Måske	Dyrker motionsidræt, løber eller lignende mindst 4 timer om ugen	Mindre god	Ved ikke	Jeg klarer mig middelt	I mindre grad	Nej	Ja - Omsorg, sundhed og pædagogik		Sosu Aarhus	0	0	0	1	0				15-25 minutter	16
Kvinde	17	40	0	1	1	0	0	0		I høj grad	I meget høj grad	I høj grad	I høj grad	I mindre grad	Slet ikke	Slet ikke	I mindre grad	I høj grad	I nogen grad	I høj grad	I høj grad	I nogen grad	Gode	Gode	Gode	Meget gode	Ved ikke	Nej	Dyrker motionsidræt, løber eller lignende mindst 4 timer om ugen	God	Ja	Jeg klarer mig meget godt	I høj grad	Nej	Ja - Omsorg, sundhed og pædagogik		SOSU Aarhus	0	0	0	1	0				30-40 minutter	17
Kvinde	17	45	0	0	1	0	0	1	morgen- og eftermiddags aktivitet	I høj grad	I høj grad	I mindre grad	I høj grad	I nogen grad	I meget høj grad	Ved ikke	I mindre grad	I høj grad	I nogen grad	I nogen grad	I mindre grad	I meget høj grad	Gode	Meget gode	Meget gode	Meget gode	Meget gode	Måske	Spadserer, cykler eller har anden lettere motion mindst 4 timer om ugen (medregn også cykling/gang til skole)	God	Nej	Jeg klarer mig middelt	I mindre grad	Nej	Ja - Omsorg, sundhed og pædagogik		SOSU Aarhus	0	0	0	1	0				45 - over 60 min	17
Mand	16	0	0	0	1	0	1	0		I mindre grad	I nogen grad	I mindre grad	I nogen grad	Slet ikke	I nogen grad	I nogen grad	I høj grad	I mindre grad	I høj grad	I meget høj grad	I meget høj grad	I meget høj grad	Middel	Middel	Middel	Meget dårlige	Meget dårlige	Nej	Spadserer, cykler eller har anden lettere motion mindst 4 timer om ugen (medregn også cykling/gang til skole)	God	Nej	Jeg klarer mig godt	I nogen grad	Nej	Ja - Teknologi, byggeri og transport.		Aarhus Tech	0	0	0	1	0				0-10 minutter	16
Mand	17	5	0	0	1	0	0	0		I nogen grad	Slet ikke	I nogen grad	I nogen grad	I mindre grad	I mindre grad	I nogen grad	I mindre grad	I nogen grad	I nogen grad	I nogen grad	I mindre grad	I mindre grad	Gode	Gode	Gode	Gode	Meget gode	Nej	Læser, ser fjernsyn eller har anden stillesiddende beskæftigelse	Dårlig	Nej	Jeg klarer mig middelt	I meget høj grad	ja, 1-5 cigaretter om dagen	Nej - jeg ved ikke hvilket hovedområde, jeg er tilknyttet (skriv gerne hvad din uddannelse hedder)	Social og sundheds assistent	Sosu Horsens	0	0	0	1	0				0-10 minutter	17
Kvinde	17	45	0	0	0	0	0	1	30 før undervisning og 30 efter undervisningen	I nogen grad	I høj grad	I høj grad	I meget høj grad	I mindre grad	I mindre grad	Slet ikke	Slet ikke	I høj grad	I nogen grad	I nogen grad	I meget høj grad	Ved ikke	Meget gode	Gode	Meget gode	Meget gode	Meget gode	Nej	Spadserer, cykler eller har anden lettere motion mindst 4 timer om ugen (medregn også cykling/gang til skole)	God	Ved ikke	Jeg klarer mig godt	I høj grad	Nej	Ja - Omsorg, sundhed og pædagogik		SOSU Aarhus	0	0	0	1	0				45 - over 60 min	17
Kvinde	18	40	1	1	1	0	0	0		I meget høj grad	Ved ikke	I nogen grad	I meget høj grad	I høj grad	I meget høj grad	Slet ikke	Slet ikke	I meget høj grad	I meget høj grad	I meget høj grad	I meget høj grad	I høj grad	Gode	Meget gode	Meget gode	Meget gode	Middel	Ja	Læser, ser fjernsyn eller har anden stillesiddende beskæftigelse	Dårlig	Nej	Jeg klarer mig godt	I meget høj grad	ja, 6-10 cigaretter om dagen	Ja - Omsorg, sundhed og pædagogik		SOSU århus	0	0	0	1	0				30-40 minutter	18
Kvinde	17	40	0	1	1	0	0	0		I nogen grad	I høj grad	I nogen grad	I meget høj grad	I høj grad	I høj grad	I mindre grad	I mindre grad	I høj grad	I høj grad	I meget høj grad	I meget høj grad	I nogen grad	Gode	Meget gode	Gode	Gode	Middel	Nej	Læser, ser fjernsyn eller har anden stillesiddende beskæftigelse	Dårlig	Ja	Jeg klarer mig godt	I høj grad	ja, 1-5 cigaretter om dagen	Ja - Omsorg, sundhed og pædagogik		Sosu Aarhus	0	0	0	1	0				30-40 minutter	17
Mand	17	0	0	0	0	1	1	0		I høj grad	I meget høj grad	I nogen grad	I meget høj grad	I høj grad	I meget høj grad	I nogen grad	Slet ikke	I nogen grad	I meget høj grad	I meget høj grad	I meget høj grad	I meget høj grad	Meget gode	Meget gode	Meget gode	Ved ikke	Ved ikke	Nej	Spadserer, cykler eller har anden lettere motion mindst 4 timer om ugen (medregn også cykling/gang til skole)	Nogenlunde	Ja	Jeg klarer mig godt	I meget høj grad	Nej	Ja - Teknologi, byggeri og transport.		EUCSyd	0	0	0	1	0				0-10 minutter	17
			0	0	0	0	0	0																														0	1	0	0	0
Kvinde	18	50	0	0	0	0	0	1	Det har mest været en halv time inden vi sluttede og en 20 minutter når vi lige var startet	I høj grad	I mindre grad	I nogen grad	I nogen grad	Slet ikke	Slet ikke	I nogen grad	I meget høj grad	I mindre grad	I høj grad	I høj grad	I høj grad	I høj grad	Meget gode	Meget gode	Meget gode	Meget gode	Meget gode	Nej	Spadserer, cykler eller har anden lettere motion mindst 4 timer om ugen (medregn også cykling/gang til skole)	God	Ja	Jeg klarer mig meget godt	I nogen grad	Nej	Ja - Omsorg, sundhed og pædagogik		Sosu aarhus	0	0	0	1	0				45 - over 60 min	18
Kvinde	18	40	0	1	1	0	0	0		I høj grad	I høj grad	I høj grad	I meget høj grad	I nogen grad	I meget høj grad	Slet ikke	Slet ikke	I meget høj grad	I nogen grad	I nogen grad	I meget høj grad	I meget høj grad	Meget gode	Gode	Meget gode	Gode	Meget gode	Nej	Spadserer, cykler eller har anden lettere motion mindst 4 timer om ugen (medregn også cykling/gang til skole)	Nogenlunde	Ja	Jeg klarer mig middelt	I høj grad	Nej	Ja - Omsorg, sundhed og pædagogik		Sosu Aarhus	0	0	0	1	0				30-40 minutter	18
Kvinde	16	10	0	0	0	1	1	1	Idrætsdagene	I nogen grad	I nogen grad	I nogen grad	I nogen grad	I nogen grad	I nogen grad	I nogen grad	I nogen grad	I nogen grad	I nogen grad	I nogen grad	I nogen grad	I nogen grad	Middel	Middel	Middel	Middel	Middel	Måske	Dyrker motionsidræt, løber eller lignende mindst 4 timer om ugen	God	Nej	Jeg klarer mig godt	I nogen grad	Nej	Ja - Omsorg, sundhed og pædagogik		AARHUS TECH	0	0	0	1	0				0-10 minutter	16
			0	0	0	0	0	0																														0	1	0	0	0
Mand	17	15	0	0	1	0	0	0		I nogen grad	I nogen grad	I nogen grad	I nogen grad	I nogen grad	I nogen grad	I nogen grad	I nogen grad	I nogen grad	I høj grad	I høj grad	I høj grad	I høj grad	Gode	Middel	Gode	Ved ikke	Meget gode	Nej	Spadserer, cykler eller har anden lettere motion mindst 4 timer om ugen (medregn også cykling/gang til skole)	Nogenlunde	Nej	Jeg klarer mig godt	I nogen grad	Ja en gang imellem til fester	Ja - Teknologi, byggeri og transport.		skive tekniske skole	0	0	0	1	0				15-25 minutter	17
			0	0	0	0	0	0																														0	1	0	0	0
Kvinde	16	over 60	1	0	1	1	0	1	I erhversfagene	I meget høj grad	I høj grad	I høj grad	I meget høj grad	I nogen grad	I nogen grad	Slet ikke	Slet ikke	I meget høj grad	I meget høj grad	I høj grad	I meget høj grad	I meget høj grad	Middel	Meget gode	Meget gode	Ved ikke	Ved ikke	Nej	Læser, ser fjernsyn eller har anden stillesiddende beskæftigelse	Mindre god	Ja	Jeg klarer mig meget godt	I meget høj grad	Nej	Ja - Teknologi, byggeri og transport.		Aarhus Tech	0	0	0	1	0				45 - over 60 min	16
Kvinde	17	15	0	0	1	0	1	0		I meget høj grad	I høj grad	I høj grad	I meget høj grad	I meget høj grad	I høj grad	Slet ikke	Slet ikke	I nogen grad	I meget høj grad	I høj grad	I nogen grad	I nogen grad	Middel	Meget dårlige	Middel	Middel	Meget dårlige	Nej	Spadserer, cykler eller har anden lettere motion mindst 4 timer om ugen (medregn også cykling/gang til skole)	Mindre god	Ja	Jeg klarer mig middelt	I høj grad	Nej	Ja - Omsorg, sundhed og pædagogik		SOSU Horsens	0	0	0	1	0				15-25 minutter	17
Mand	16	10	0	1	1	0	0	0		I nogen grad	I nogen grad	I høj grad	I meget høj grad	Slet ikke	I mindre grad	I høj grad	I nogen grad	I nogen grad	I nogen grad	I høj grad	I meget høj grad	I nogen grad	Meget gode	Middel	Meget gode	Meget dårlige	Meget dårlige	Måske	Læser, ser fjernsyn eller har anden stillesiddende beskæftigelse	God	Ja	Jeg klarer mig middelt	I meget høj grad	ja, 1-5 cigaretter om dagen	Nej - jeg ved ikke hvilket hovedområde, jeg er tilknyttet (skriv gerne hvad din uddannelse hedder)	Trends og Medie	Aarhus Tech	0	0	0	1	0				0-10 minutter	16
Kvinde	17	40	0	0	1	0	1	1	Hver morgen	I høj grad	I nogen grad	I nogen grad	I høj grad	I nogen grad	I nogen grad	Slet ikke	Ved ikke	I høj grad	I høj grad	I høj grad	I nogen grad	I nogen grad	Middel	Meget gode	Meget gode	Gode	Gode	Ja	Dyrker motionsidræt, løber eller lignende mindst 4 timer om ugen	Nogenlunde	Ja	Jeg klarer mig middelt	I nogen grad	Nej	Ja - Omsorg, sundhed og pædagogik		Sosu Århus	0	0	0	1	0				30-40 minutter	17
Kvinde	18	5	0	0	0	0	1	0																														0	0	1	0	0				0-10 minutter	18
Kvinde	17	25	0	0	1	0	0	0		I nogen grad	I nogen grad	I nogen grad	I høj grad	I nogen grad	I nogen grad	I mindre grad	I mindre grad	I høj grad	I meget høj grad	I høj grad	I høj grad	I nogen grad	Middel	Gode	Gode	Ved ikke	Meget dårlige	Måske	Spadserer, cykler eller har anden lettere motion mindst 4 timer om ugen (medregn også cykling/gang til skole)	Nogenlunde	Ja	Jeg klarer mig godt	I høj grad	Ja en gang imellem til fester	Ja - Omsorg, sundhed og pædagogik		Aarhus Tech	0	0	0	1	0				15-25 minutter	17
Mand	17	25	0	1	1	0	0	0		I høj grad	I høj grad	I høj grad	I høj grad	I høj grad	I høj grad	I nogen grad	I mindre grad	I nogen grad	I høj grad	I nogen grad	I høj grad	I høj grad	Gode	Middel	Middel	Middel	Gode	Ja	Spadserer, cykler eller har anden lettere motion mindst 4 timer om ugen (medregn også cykling/gang til skole)	Nogenlunde	Ja	Jeg klarer mig middelt	I høj grad	Nej	Ja - Fødevarer, jordbrug og oplevelser		aarhus tech	0	0	0	1	0				15-25 minutter	17
Kvinde	17	15	0	1	1	0	0	0		Ved ikke	Ved ikke	I høj grad	I mindre grad	I mindre grad	I mindre grad	I mindre grad	I nogen grad	Ved ikke	I mindre grad	I nogen grad	Slet ikke	I nogen grad	Gode	Middel	Ved ikke	Middel	Ved ikke	Måske	Læser, ser fjernsyn eller har anden stillesiddende beskæftigelse	Nogenlunde	Ja	Jeg klarer mig middelt	I nogen grad	Nej	Ja - Omsorg, sundhed og pædagogik		Sosu Aarhus	0	0	0	1	0				15-25 minutter	17
			0	0	0	0	0	0																														0	1	0	0	0
Mand	17	10	0	0	1	0	1	0		I høj grad	I høj grad	I mindre grad	I nogen grad	I nogen grad	I meget høj grad	Slet ikke	I nogen grad	I nogen grad	I høj grad	I høj grad	I høj grad	I høj grad	Middel	Middel	Middel	Ved ikke	Ved ikke	Nej	Spadserer, cykler eller har anden lettere motion mindst 4 timer om ugen (medregn også cykling/gang til skole)	Dårlig	Nej	Jeg klarer mig godt	I høj grad	Ja, mere en 11 cigaretter om dagen	Nej - jeg ved ikke hvilket hovedområde, jeg er tilknyttet (skriv gerne hvad din uddannelse hedder)	euc	EUC holbæk	0	0	0	1	0				0-10 minutter	17
Kvinde	17	20	0	1	0	0	0	0		I høj grad	I høj grad	I høj grad	I høj grad	I mindre grad	I høj grad	Slet ikke	Slet ikke	I høj grad	I høj grad	I høj grad	I høj grad	I høj grad	Middel	Gode	Middel	Middel	Middel	Nej	Dyrker motionsidræt, løber eller lignende mindst 4 timer om ugen	God	Nej	Jeg klarer mig godt	I høj grad	Nej	Ja - Omsorg, sundhed og pædagogik		Sosu Esbjerg	0	0	0	1	0				15-25 minutter	17
			0	0	0	0	0	0																														0	1	0	0	0
Mand	17	30	1	0	1	0	0	0		I nogen grad	I nogen grad	I høj grad	I meget høj grad	I nogen grad	I høj grad	Slet ikke	I mindre grad	I høj grad	I nogen grad	I høj grad	I meget høj grad	I høj grad	Ved ikke	Ved ikke	Ved ikke	Ved ikke	Ved ikke	Nej	Spadserer, cykler eller har anden lettere motion mindst 4 timer om ugen (medregn også cykling/gang til skole)	Nogenlunde	Ja	Jeg klarer mig meget godt	I høj grad	Nej	Ja - Teknologi, byggeri og transport.		Euc Nordvestsjælland Holbæk	0	0	0	1	0				30-40 minutter	17
Kvinde	17	10	0	0	1	0	0	0		I høj grad	I høj grad	Slet ikke	I nogen grad	Ved ikke	Ved ikke	Ved ikke	Ved ikke	I nogen grad	I nogen grad	I nogen grad	I høj grad	I nogen grad	Middel	Middel	Gode	Ved ikke	Ved ikke	Nej	Dyrker motionsidræt, løber eller lignende mindst 4 timer om ugen	God	Nej	Jeg klarer mig middelt	I høj grad	Nej	Ja - Omsorg, sundhed og pædagogik		Aarhus tech	0	0	0	1	0				0-10 minutter	17
			0	0	0	0	0	0																														0	1	0	0	0
Kvinde	16	35	0	0	0	0	0	1	Når vi er i køkkenet	I høj grad	I nogen grad	I nogen grad	I nogen grad	I nogen grad	I nogen grad	I nogen grad	I mindre grad	I nogen grad	I høj grad	I høj grad	I nogen grad	I høj grad	Middel	Gode	Middel	Ved ikke	Dårlige	Ved ikke	Spadserer, cykler eller har anden lettere motion mindst 4 timer om ugen (medregn også cykling/gang til skole)	Nogenlunde	Ved ikke	Jeg klarer mig middelt	I høj grad	Nej	Ja - Fødevarer, jordbrug og oplevelser		Aalborg tech College food	0	0	0	1	0				30-40 minutter	16
Kvinde	16	15	1	0	0	0	1	0		I nogen grad	I nogen grad	I nogen grad	I nogen grad	I nogen grad	I nogen grad	I nogen grad	I nogen grad	I nogen grad	I høj grad	I høj grad	I meget høj grad	I høj grad	Middel	Middel	Middel	Dårlige	Dårlige	Måske	Træner hårdt og dyrker konkurrenceidræt regelmæssigt og flere gange om ugen	Nogenlunde	Nej	Jeg klarer mig godt	I nogen grad	Ja, mere en 11 cigaretter om dagen	Ja - Omsorg, sundhed og pædagogik		Aarhus tech	0	0	0	1	0				15-25 minutter	16
Mand	19	15	1	0	0	0	0	0		I høj grad	I høj grad	I høj grad	I nogen grad	I nogen grad	I nogen grad	I mindre grad	I nogen grad	I høj grad	I høj grad	I høj grad	I høj grad	I høj grad	Gode	Gode	Middel	Meget dårlige	Gode	Ja	Spadserer, cykler eller har anden lettere motion mindst 4 timer om ugen (medregn også cykling/gang til skole)	Nogenlunde	Ja	Jeg klarer mig middelt	I høj grad	Nej	Ja - Teknologi, byggeri og transport.		EUC Syd Sønderborg	0	0	0	1	0				15-25 minutter	19
Kvinde	18	25	0	0	1	1	1	0		I høj grad	I høj grad	I meget høj grad	I høj grad	I høj grad	I meget høj grad	I høj grad	I nogen grad	I høj grad	I høj grad	I høj grad	I høj grad	I høj grad	Meget gode	Gode	Middel	Middel	Gode	Nej	Træner hårdt og dyrker konkurrenceidræt regelmæssigt og flere gange om ugen	Nogenlunde	Nej	Jeg klarer mig godt	Slet ikke	Nej	Ja - Omsorg, sundhed og pædagogik		euc holbæk	0	0	0	1	0				15-25 minutter	18
Kvinde	17	20	1	0	1	1	1	0		I meget høj grad	I høj grad	I høj grad	I høj grad	I høj grad	I høj grad	Slet ikke	Ved ikke	I høj grad	I høj grad	I høj grad	I høj grad	I nogen grad	Middel	Middel	Middel	Gode	Middel	Måske	Læser, ser fjernsyn eller har anden stillesiddende beskæftigelse	Mindre god	Ja	Jeg klarer mig godt	I høj grad	Nej	Ja - Omsorg, sundhed og pædagogik		SOSU Horsens	0	0	0	1	0				15-25 minutter	17
Kvinde	18	55	0	0	0	0	1	0		I høj grad	I høj grad	I meget høj grad	I meget høj grad	I høj grad	I høj grad	I mindre grad	I mindre grad	I meget høj grad	I høj grad	I meget høj grad	I høj grad	I høj grad	Middel	Middel	Middel	Middel	Middel	Nej	Træner hårdt og dyrker konkurrenceidræt regelmæssigt og flere gange om ugen	Nogenlunde	Ja	Jeg klarer mig godt	I høj grad	Nej	Ja - Omsorg, sundhed og pædagogik		Sosu Horsens	0	0	0	1	0				45 - over 60 min	18
			0	0	0	0	0	0																														0	1	0	0	0
Mand	17	30	0	1	1	0	1	0		I høj grad	I meget høj grad	I meget høj grad	I meget høj grad	I nogen grad	I høj grad	Slet ikke	Slet ikke	I høj grad	I nogen grad	I nogen grad	I meget høj grad	I høj grad	Gode	Gode	Middel	Meget gode	Meget gode	Nej	Spadserer, cykler eller har anden lettere motion mindst 4 timer om ugen (medregn også cykling/gang til skole)	God	Ja	Jeg klarer mig godt	I meget høj grad	Nej	Ja - Omsorg, sundhed og pædagogik		sosu Aarhus	0	0	0	1	0				30-40 minutter	17
Kvinde	16	20	0	0	1	1	0	0		Ved ikke	Ved ikke	I mindre grad	I mindre grad	Slet ikke	I nogen grad	I høj grad	I meget høj grad	I nogen grad	I høj grad	I høj grad	I høj grad	I høj grad	Meget gode	Middel	Middel	Meget dårlige	Middel	Nej	Dyrker motionsidræt, løber eller lignende mindst 4 timer om ugen	Nogenlunde	Ved ikke	Jeg klarer mig meget godt	I meget høj grad	ja, 6-10 cigaretter om dagen	Ja - Fødevarer, jordbrug og oplevelser		Aalborg tech	0	0	0	1	0				15-25 minutter	16
Kvinde	17	10	0	0	0	1	0	0		I meget høj grad	I høj grad	I meget høj grad	I meget høj grad	I mindre grad	I høj grad	Slet ikke	Ved ikke	I meget høj grad	I meget høj grad	I høj grad	I meget høj grad	Slet ikke	Dårlige	Dårlige	Gode	Ved ikke	Gode	Nej	Træner hårdt og dyrker konkurrenceidræt regelmæssigt og flere gange om ugen	God	Ja	Jeg klarer mig middelt	I nogen grad	Ja en gang imellem til fester	Ja - Fødevarer, jordbrug og oplevelser		Aarhus tech	0	0	0	1	0				0-10 minutter	17
Mand	17	0	1	0	0	0	0	0		I høj grad	I nogen grad	I høj grad	I høj grad	Slet ikke	I nogen grad	Slet ikke	Slet ikke	I høj grad	Slet ikke	Slet ikke	Slet ikke	Slet ikke	Middel	Middel	Middel	Gode	Meget dårlige	Nej	Træner hårdt og dyrker konkurrenceidræt regelmæssigt og flere gange om ugen	God	Ja	Jeg klarer mig godt	I høj grad	Nej	Ja - Teknologi, byggeri og transport.		Eucnvs	0	0	0	1	0				0-10 minutter	17
Kvinde	17	0	0	0	1	0	0	0		I nogen grad	I nogen grad	I nogen grad	I nogen grad	I nogen grad	I nogen grad	I nogen grad	I nogen grad	I nogen grad	I nogen grad	I nogen grad	I nogen grad	I nogen grad	Dårlige	Dårlige	Dårlige	Dårlige	Dårlige	Ja	Spadserer, cykler eller har anden lettere motion mindst 4 timer om ugen (medregn også cykling/gang til skole)	Virkelig god	Ved ikke	Ved ikke	Ved ikke	Ja, mere en 11 cigaretter om dagen	Nej - jeg ved ikke hvilket hovedområde, jeg er tilknyttet (skriv gerne hvad din uddannelse hedder)	Trend og medie	Aarhus tech	0	0	0	1	0				0-10 minutter	17
Mand	17	15	0	1	0	0	0	0		I nogen grad	I mindre grad	I mindre grad	I høj grad	Slet ikke	I nogen grad	I mindre grad	Slet ikke	I høj grad	I høj grad	I høj grad	I høj grad	I høj grad	Gode	Middel	Gode	Meget dårlige	Gode	Nej	Spadserer, cykler eller har anden lettere motion mindst 4 timer om ugen (medregn også cykling/gang til skole)	Nogenlunde	Ja	Jeg klarer mig godt	I meget høj grad	ja, 1-5 cigaretter om dagen	Ja - Fødevarer, jordbrug og oplevelser		Aarhus tech	0	0	0	1	0				15-25 minutter	17
			0	0	0	0	0	0																														0	1	0	0	0
Mand	18	20	0	1	0	0	0	0		I høj grad	Slet ikke	I nogen grad	I nogen grad	Slet ikke	Slet ikke	I høj grad	I nogen grad	I nogen grad	I høj grad	I høj grad	I høj grad	I høj grad	Gode	Gode	Gode	Ved ikke	Ved ikke	Nej	Læser, ser fjernsyn eller har anden stillesiddende beskæftigelse	God	Ja	Jeg klarer mig godt	I høj grad	Nej	Ja - Teknologi, byggeri og transport.		Aarhus tech	0	0	0	1	0				15-25 minutter	18
Kvinde	17	45	1	0	0	0	0	0		I høj grad	Ved ikke	I høj grad	Slet ikke	I høj grad	I høj grad	Slet ikke	Slet ikke	I høj grad	I høj grad	I høj grad	I høj grad	I høj grad	Gode	Ved ikke	Gode	Meget gode	Meget gode	Nej	Træner hårdt og dyrker konkurrenceidræt regelmæssigt og flere gange om ugen	God	Ja	Jeg klarer mig godt	Ved ikke	Ja en gang imellem til fester	Ja - Omsorg, sundhed og pædagogik		Randers social- sundhedsskolen	0	0	0	1	0				45 - over 60 min	17
Kvinde	16	30	0	1	0	0	0	0		I meget høj grad	I høj grad	I høj grad	I høj grad	I høj grad	I nogen grad	Slet ikke	Slet ikke	I meget høj grad	I høj grad	I meget høj grad	I meget høj grad	I mindre grad	Gode	Middel	Gode	Gode	Middel	Nej	Spadserer, cykler eller har anden lettere motion mindst 4 timer om ugen (medregn også cykling/gang til skole)	God	Ja	Jeg klarer mig meget godt	I høj grad	Nej	Ja - Omsorg, sundhed og pædagogik		SOSU	0	0	0	1	0				30-40 minutter	16
			0	0	0	0	0	0																														0	1	0	0	0
Mand	18	40	0	0	0	1	0	0		Ved ikke	Slet ikke	Slet ikke	I nogen grad	I mindre grad	I høj grad	I nogen grad	I meget høj grad	I mindre grad	I mindre grad	I meget høj grad	I meget høj grad	I meget høj grad	Meget dårlige	Middel	Middel	Meget gode	Ved ikke	Ja	Læser, ser fjernsyn eller har anden stillesiddende beskæftigelse	Dårlig	Nej	Jeg klarer mig godt	I høj grad	Nej	Ja - Teknologi, byggeri og transport.		holbæk euc	0	0	0	1	0				30-40 minutter	18
Kvinde	17	20	1	0	0	1	1	0		I meget høj grad	I mindre grad	I nogen grad	I nogen grad	Slet ikke	I mindre grad	I meget høj grad	I nogen grad	I høj grad	I meget høj grad	I meget høj grad	I mindre grad	I meget høj grad	Meget gode		Meget gode	Ved ikke	Ved ikke											0	0	1	0	0				15-25 minutter	17
			0	0	0	0	0	0																														0	1	0	0	0
Kvinde	16	15	1	0	1	0	1	0		I meget høj grad	Ved ikke	Ved ikke	Ved ikke	Ved ikke	Ved ikke	Slet ikke	I meget høj grad	I meget høj grad																				0	0	1	0	0				15-25 minutter	16
			0	0	0	0	0	0																														0	1	0	0	0
Kvinde	17	20	0	1	0	0	0	0		I høj grad	I nogen grad	I nogen grad	I høj grad	I nogen grad	I nogen grad	Slet ikke	I nogen grad	I nogen grad	I høj grad	I høj grad	I høj grad	I høj grad	Gode	Middel	Middel	Gode	Middel	Måske										0	0	1	0	0				15-25 minutter	17
Mand	16	20	0	1	0	1	0	0		Ved ikke	Ved ikke	Ved ikke	Ved ikke	Ved ikke	Ved ikke	Ved ikke	Ved ikke	Ved ikke	Ved ikke	Ved ikke	Ved ikke	Ved ikke	Ved ikke	Ved ikke	Ved ikke	Meget dårlige	Ved ikke	Ja	Læser, ser fjernsyn eller har anden stillesiddende beskæftigelse	Nogenlunde	Ja	Jeg klarer mig slet ikke godt	I høj grad	Ja, mere en 11 cigaretter om dagen	Ja - Omsorg, sundhed og pædagogik		Den her	0	0	0	1	0				15-25 minutter	16
Mand	17	30	1	1	1	1	1	0		I høj grad	I høj grad	I nogen grad	I høj grad	I nogen grad	I nogen grad	I nogen grad	I nogen grad	I nogen grad	I nogen grad	I nogen grad	I nogen grad	I nogen grad	Meget gode	Gode	Gode	Meget gode	Dårlige	Måske	Læser, ser fjernsyn eller har anden stillesiddende beskæftigelse	God	Ja	Jeg klarer mig middelt	I høj grad	ja, 6-10 cigaretter om dagen	Ja - Teknologi, byggeri og transport.		EUC NORDVESTSJÆLLNAD	0	0	0	1	0				30-40 minutter	17
Mand	17	40	0	0	1	0	0	0		I nogen grad	I meget høj grad	I meget høj grad	I meget høj grad	I nogen grad	I høj grad	Slet ikke	Slet ikke	I meget høj grad	I mindre grad	I nogen grad	I høj grad	I nogen grad	Gode	Ved ikke	Meget gode	Ved ikke	Middel	Nej	Dyrker motionsidræt, løber eller lignende mindst 4 timer om ugen	God	Ja	Jeg klarer mig godt	I høj grad	Nej	Ja - Teknologi, byggeri og transport.		Teknisk skole Skive	0	0	0	1	0				30-40 minutter	17
Kvinde	18	30	0	0	0	0	0	1																														0	0	1	0	0				30-40 minutter	18
			0	0	0	0	0	0																														0	1	0	0	0
Kvinde	17	15	0	0	1	0	0	0		I høj grad	I høj grad	I nogen grad	I høj grad	I høj grad	I høj grad	Slet ikke	Slet ikke	I høj grad	I høj grad	I høj grad	I høj grad	I høj grad	Gode	Gode	Gode	Gode	Ved ikke	Nej	Læser, ser fjernsyn eller har anden stillesiddende beskæftigelse	Mindre god	Ja	Jeg klarer mig godt	I høj grad	Nej	Nej - jeg ved ikke hvilket hovedområde, jeg er tilknyttet (skriv gerne hvad din uddannelse hedder)	Grundforløb 1	Sosu Aahus	0	0	0	1	0				15-25 minutter	17
Mand	17	30	1	0	1	1	0	0		I nogen grad	I høj grad	I nogen grad	I høj grad	I nogen grad	I høj grad	Slet ikke	I nogen grad	I meget høj grad	I meget høj grad	I høj grad	I høj grad	I høj grad	Meget gode	Gode	Gode	Ved ikke	Ved ikke	Nej	Spadserer, cykler eller har anden lettere motion mindst 4 timer om ugen (medregn også cykling/gang til skole)	God	Ved ikke	Jeg klarer mig godt	I nogen grad	Nej	Ja - Fødevarer, jordbrug og oplevelser		Tech college	0	0	0	1	0				30-40 minutter	17
			0	0	0	0	0	0																														0	1	0	0	0
Mand	17	0	0	0	1	1	0	1	Nogle gange hvis vi ik havde noget at lave	I høj grad	I nogen grad	I nogen grad	I meget høj grad	I nogen grad	I nogen grad	I mindre grad	I nogen grad	I høj grad	I nogen grad	I høj grad	I høj grad	I meget høj grad	Dårlige	Middel	Middel	Middel	Dårlige	Ja	Træner hårdt og dyrker konkurrenceidræt regelmæssigt og flere gange om ugen	Nogenlunde	Ved ikke	Jeg klarer mig godt	Ved ikke	Ja en gang imellem til fester	Nej - jeg ved ikke hvilket hovedområde, jeg er tilknyttet (skriv gerne hvad din uddannelse hedder)	Mekaniker	Aarhus tech	0	0	0	1	0				0-10 minutter	17
Mand	17	30	0	0	1	0	1	0		I mindre grad	I nogen grad	I nogen grad	I nogen grad	I høj grad	I mindre grad	I mindre grad	Slet ikke	I høj grad	I høj grad	I nogen grad	I nogen grad	I nogen grad																0	0	1	0	0				30-40 minutter	17
Mand	18	30	0	0	1	0	0	0		I høj grad	I høj grad	I høj grad	I høj grad	I mindre grad	I høj grad	I mindre grad	I mindre grad	I høj grad	I nogen grad	I høj grad	I nogen grad	I høj grad	Middel	Gode	Middel	Gode	Gode	Nej	Dyrker motionsidræt, løber eller lignende mindst 4 timer om ugen	Nogenlunde	Ja	Jeg klarer mig middelt	I nogen grad	ja, 1-5 cigaretter om dagen	Ja - Teknologi, byggeri og transport.		Campus Bornholm	0	0	0	1	0				30-40 minutter	18
Mand	17	30	1	0	1	1	0	0		I høj grad	I høj grad	I høj grad	I nogen grad	I nogen grad	I høj grad	Slet ikke	Slet ikke	I høj grad	I høj grad	I nogen grad	I høj grad	I mindre grad	Middel	Middel	Middel	Middel	Dårlige	Nej	Træner hårdt og dyrker konkurrenceidræt regelmæssigt og flere gange om ugen	God	Ja	Jeg klarer mig middelt	I høj grad	Nej	Ja - Teknologi, byggeri og transport.		Celf	0	0	0	1	0				30-40 minutter	17
Mand	18	45	0	0	1	0	0	0		I mindre grad	I mindre grad	Slet ikke	I nogen grad	I mindre grad	I nogen grad	I mindre grad	I mindre grad	I høj grad	I mindre grad	I mindre grad	I nogen grad	I høj grad	Meget dårlige	Meget gode	Gode	Middel	Gode	Nej	Læser, ser fjernsyn eller har anden stillesiddende beskæftigelse	Nogenlunde	Nej	Jeg klarer mig middelt	I nogen grad	Nej	Ja - Teknologi, byggeri og transport.		Campus Bornholm	0	0	0	1	0				45 - over 60 min	18
Kvinde	17	5	1	0	0	0	0	0		I nogen grad	I høj grad	I meget høj grad	I meget høj grad	I mindre grad	I høj grad	Slet ikke	Slet ikke	I meget høj grad	I høj grad	I nogen grad	I nogen grad	I mindre grad	Middel	Dårlige	Meget gode	Meget dårlige	Middel	Nej	Dyrker motionsidræt, løber eller lignende mindst 4 timer om ugen	God	Ja	Jeg klarer mig meget godt	I meget høj grad	Ja en gang imellem til fester	Ja - Omsorg, sundhed og pædagogik		Aarhus Tech	0	0	0	1	0				0-10 minutter	17
Mand	17	15	0	0	1	1	0	0		Ved ikke	Ved ikke	Ved ikke	Ved ikke	Ved ikke	Ved ikke	Ved ikke	Ved ikke	Ved ikke	Ved ikke	Ved ikke	Ved ikke	I nogen grad	Ved ikke	Ved ikke	Ved ikke	Ved ikke	Ved ikke	Nej	Spadserer, cykler eller har anden lettere motion mindst 4 timer om ugen (medregn også cykling/gang til skole)	Nogenlunde	Nej	Jeg klarer mig meget godt	I nogen grad	Nej	Ja - Teknologi, byggeri og transport.		Skive tekniske skole	0	0	0	1	0				15-25 minutter	17
Kvinde	17	20	0	0	0	0	1	0		I meget høj grad	I meget høj grad	I mindre grad	I mindre grad	I mindre grad	I mindre grad	I mindre grad	I høj grad	I meget høj grad	I høj grad	I høj grad	I nogen grad	I meget høj grad	Middel	Middel	Middel	Meget dårlige	Meget dårlige	Måske	Dyrker motionsidræt, løber eller lignende mindst 4 timer om ugen	God	Nej	Jeg klarer mig middelt	I høj grad	Nej	Ja - Omsorg, sundhed og pædagogik		århus tech	0	0	0	1	0				15-25 minutter	17
Kvinde	17	10	0	1	1	1	0	0		I høj grad	I nogen grad	I mindre grad	I nogen grad	I mindre grad	I nogen grad	I mindre grad	Slet ikke	I høj grad	I høj grad	I høj grad	I høj grad	I høj grad	Middel	Dårlige	Meget gode	Dårlige	Dårlige	Nej	Dyrker motionsidræt, løber eller lignende mindst 4 timer om ugen	Nogenlunde	Ved ikke	Jeg klarer mig meget godt	I høj grad	Nej	Nej - jeg ved ikke hvilket hovedområde, jeg er tilknyttet (skriv gerne hvad din uddannelse hedder)	Mediegrafiker	Aarhus tech	0	0	0	1	0				0-10 minutter	17
Kvinde	16	40	1	0	0	1	0	0		I nogen grad	I mindre grad	I nogen grad	I nogen grad	I nogen grad	I nogen grad	I høj grad	I nogen grad	I nogen grad	I nogen grad	I nogen grad	I høj grad	I nogen grad	Middel	Middel	Gode	Ved ikke	Ved ikke	Nej	Spadserer, cykler eller har anden lettere motion mindst 4 timer om ugen (medregn også cykling/gang til skole)	Nogenlunde	Ja	Jeg klarer mig meget godt						0	0	1	0	0				30-40 minutter	16
Mand	18	10	1	0	0	1	0	0		I høj grad	I mindre grad	I mindre grad	I mindre grad	Slet ikke	I mindre grad	Ved ikke	Slet ikke	I mindre grad	I mindre grad	I mindre grad	I mindre grad	I mindre grad	Ved ikke	Ved ikke	Ved ikke	Ved ikke	Middel	Ved ikke	Læser, ser fjernsyn eller har anden stillesiddende beskæftigelse	Nogenlunde	Nej	Jeg klarer mig godt	I høj grad	Nej	Ja - Teknologi, byggeri og transport.		Aarhus tech	0	0	0	1	0				0-10 minutter	18
Kvinde	17		0	0	0	0	0	0																														0	0	1	0	0					17
Kvinde	17	10	0	0	1	0	0	1	Kbh tur	I mindre grad	I nogen grad	I mindre grad	I nogen grad	Slet ikke	Slet ikke	I mindre grad	I nogen grad	I nogen grad	Slet ikke	Slet ikke	Slet ikke	Slet ikke	Dårlige	Middel	Dårlige	Dårlige	Middel	Ja	Spadserer, cykler eller har anden lettere motion mindst 4 timer om ugen (medregn også cykling/gang til skole)	Dårlig	Nej	Jeg klarer mig middelt	I nogen grad	ja, 6-10 cigaretter om dagen	Ja - Teknologi, byggeri og transport.		Skive Teknisk Skole	0	0	0	1	0				0-10 minutter	17
Mand	19	0	0	1	1	1	0	0		Ved ikke	I mindre grad	Slet ikke	Slet ikke	I nogen grad	Ved ikke	I høj grad	I meget høj grad	Slet ikke	Slet ikke	Ved ikke	I mindre grad	Slet ikke	Gode	Dårlige	Meget dårlige	Meget dårlige	Dårlige	Ja	Spadserer, cykler eller har anden lettere motion mindst 4 timer om ugen (medregn også cykling/gang til skole)	God	Nej	Jeg klarer mig meget godt	I nogen grad	Nej	Nej - jeg ved ikke hvilket hovedområde, jeg er tilknyttet (skriv gerne hvad din uddannelse hedder)	Web-integrator GF1	AARHUS TECH	0	0	0	1	0				0-10 minutter	19
Kvinde	17	55	0	0	1	0	0	0		I høj grad	I høj grad	I meget høj grad	I høj grad	I nogen grad	I meget høj grad	Slet ikke	I høj grad	I meget høj grad	I høj grad	I høj grad	I meget høj grad	I meget høj grad	Meget gode	Meget gode	Meget gode	Meget gode	Meget gode	Nej	Træner hårdt og dyrker konkurrenceidræt regelmæssigt og flere gange om ugen	God	Ja	Jeg klarer mig godt	I meget høj grad	ja, 1-5 cigaretter om dagen	Ja - Omsorg, sundhed og pædagogik		Sosu Aarhus	0	0	0	1	0				45 - over 60 min	17
Mand	17	over 60	0	1	0	0	1	0		I meget høj grad	I meget høj grad	I meget høj grad	I meget høj grad	I meget høj grad	I meget høj grad	I meget høj grad	I meget høj grad	I meget høj grad	I meget høj grad	I meget høj grad	I meget høj grad	I meget høj grad	Meget gode	Meget gode	Meget gode	Meget gode	Meget gode	Ved ikke	Læser, ser fjernsyn eller har anden stillesiddende beskæftigelse	God	Ja	Jeg klarer mig godt	I høj grad	Nej	Ja - Teknologi, byggeri og transport.		Aarhus tech	0	0	0	1	0				45 - over 60 min	17
Mand	17	15	0	0	0	1	0	1	walk and talk	I nogen grad	I meget høj grad	I meget høj grad	I høj grad	I høj grad	I meget høj grad	Slet ikke	I mindre grad	I meget høj grad	I meget høj grad	I meget høj grad	I meget høj grad	Slet ikke	Middel	Middel	Middel	Middel	Dårlige	Nej	Dyrker motionsidræt, løber eller lignende mindst 4 timer om ugen	God	Ja	Jeg klarer mig meget godt	I høj grad	Nej	Ja - Teknologi, byggeri og transport.		AAHUS TECH	0	0	0	1	0				15-25 minutter	17
Mand	16	20	0	1	1	1	0	0		I nogen grad	I høj grad	I nogen grad	Ved ikke	I mindre grad	I høj grad	I mindre grad	I mindre grad	Ved ikke	I høj grad	I høj grad	I høj grad	I nogen grad	Meget dårlige	Meget dårlige	Meget gode	Meget dårlige	Middel	Nej	Læser, ser fjernsyn eller har anden stillesiddende beskæftigelse	Nogenlunde	Ja	Jeg klarer mig godt	I høj grad	Nej	Ja - Teknologi, byggeri og transport.		Skive Tekniske Skole	0	0	0	1	0				15-25 minutter	16
Kvinde	16	10	1	0	0	0	0	0		I nogen grad	I meget høj grad	I nogen grad	I høj grad	I nogen grad	I høj grad	Slet ikke	I meget høj grad	I nogen grad	I høj grad	I høj grad	I høj grad	I nogen grad	Dårlige	Ved ikke	Middel	Ved ikke	Ved ikke	Ja	Læser, ser fjernsyn eller har anden stillesiddende beskæftigelse	Dårlig	Ved ikke	Jeg klarer mig middelt	I høj grad	Ja en gang imellem til fester	Ja - Teknologi, byggeri og transport.		Aarhus	0	0	0	1	0				0-10 minutter	16
Kvinde	17	30	0	0	1	0	0	0		I nogen grad	I nogen grad	I nogen grad	I nogen grad	I mindre grad	I nogen grad	Slet ikke	Slet ikke	I høj grad	I høj grad	I nogen grad	I nogen grad	I høj grad	Gode	Gode	Gode	Gode	Ved ikke	Nej	Spadserer, cykler eller har anden lettere motion mindst 4 timer om ugen (medregn også cykling/gang til skole)	Mindre god	Ja	Jeg klarer mig middelt	I høj grad	Nej	Ja - Omsorg, sundhed og pædagogik		SoSU Aarhus	0	0	0	1	0				30-40 minutter	17
			0	0	0	0	0	0																														0	1	0	0	0
Kvinde	17	20	0	0	1	0	0	0		I meget høj grad	I meget høj grad	I meget høj grad	I meget høj grad	I meget høj grad	I meget høj grad	Slet ikke	Slet ikke	I meget høj grad	I meget høj grad	I meget høj grad	I meget høj grad	I meget høj grad	Meget gode	Middel	Meget gode	Meget dårlige	Meget dårlige	Nej	Træner hårdt og dyrker konkurrenceidræt regelmæssigt og flere gange om ugen	God	Ja	Jeg klarer mig middelt	I høj grad	Nej	Ja - Omsorg, sundhed og pædagogik		Kolding Sosu	0	0	0	1	0				15-25 minutter	17
Mand	17	5	0	0	1	0	1	0		Slet ikke	I nogen grad	Slet ikke	Slet ikke	Slet ikke	Slet ikke	I mindre grad	I nogen grad	I høj grad	I nogen grad	Slet ikke	I mindre grad	Slet ikke	Meget gode	Meget gode	Gode	Ved ikke	Ved ikke	Ja	Læser, ser fjernsyn eller har anden stillesiddende beskæftigelse	Nogenlunde	Nej	Jeg klarer mig godt	I høj grad	Nej	Ja - Omsorg, sundhed og pædagogik		Aarhus	0	0	0	1	0				0-10 minutter	17
Kvinde	17	30	0	1	1	0	0	0		I høj grad	I høj grad	I høj grad	I høj grad	I høj grad	I høj grad	Slet ikke	Slet ikke	I høj grad	I høj grad	I meget høj grad	I høj grad	I meget høj grad	Meget gode	Meget gode	Meget gode	Meget gode	Meget gode	Nej	Spadserer, cykler eller har anden lettere motion mindst 4 timer om ugen (medregn også cykling/gang til skole)	Mindre god	Ja	Jeg klarer mig ikke så godt	I meget høj grad	Nej	Ja - Omsorg, sundhed og pædagogik		sosu hosens	0	0	0	1	0				30-40 minutter	17
Kvinde	16	30	0	1	0	0	0	1	idrætsdage	I nogen grad	I nogen grad	I nogen grad	I høj grad	I mindre grad	I nogen grad	I nogen grad	I mindre grad	I nogen grad	I nogen grad	I nogen grad	I høj grad	I nogen grad	Gode	Middel	Gode	Meget dårlige	Meget dårlige	Nej	Spadserer, cykler eller har anden lettere motion mindst 4 timer om ugen (medregn også cykling/gang til skole)	Nogenlunde	Ja	Jeg klarer mig godt	I høj grad	Nej	Ja - Teknologi, byggeri og transport.		Aarhus tech	0	0	0	1	0				30-40 minutter	16
Kvinde	17	over 60	0	0	1	0	1	0		I nogen grad	Ved ikke	I nogen grad	I nogen grad	I mindre grad	I nogen grad	Slet ikke	Slet ikke	I høj grad	I høj grad	I høj grad	I høj grad	Ved ikke	Gode	Gode	Middel	Ved ikke	Middel	Måske	Spadserer, cykler eller har anden lettere motion mindst 4 timer om ugen (medregn også cykling/gang til skole)	Nogenlunde	Ja	Jeg klarer mig middelt	I nogen grad	Ja en gang imellem til fester	Ja - Teknologi, byggeri og transport.		Skive teknisk skole	0	0	0	1	0				45 - over 60 min	17
Mand	16	35	0	0	1	0	0	0		Slet ikke	Slet ikke	I mindre grad	I nogen grad	Slet ikke	I mindre grad	I mindre grad	I høj grad	I mindre grad	Slet ikke	Slet ikke	I høj grad	I meget høj grad	Gode	Meget gode	Gode	Gode	Ved ikke	Nej	Spadserer, cykler eller har anden lettere motion mindst 4 timer om ugen (medregn også cykling/gang til skole)	Mindre god	Ja	Jeg klarer mig godt	I meget høj grad	Nej	Ja - Teknologi, byggeri og transport.		Skive Teknisk Skole	0	0	0	1	0				30-40 minutter	16
Mand	16	5	0	0	0	0	1	1	"Walk and talk" = Tur op til bussen	I meget høj grad	I meget høj grad	I meget høj grad	I meget høj grad	Slet ikke	I meget høj grad	Slet ikke	I mindre grad	I meget høj grad	I meget høj grad	I meget høj grad	I høj grad	I mindre grad	Gode	Meget dårlige	Middel	Meget dårlige	Meget dårlige	Nej	Læser, ser fjernsyn eller har anden stillesiddende beskæftigelse	Nogenlunde	Ja	Jeg klarer mig godt	I nogen grad	Nej	Ja - Teknologi, byggeri og transport.		Aarhus Tech	0	0	0	1	0				0-10 minutter	16
Kvinde	16	10	0	1	1	0	0	0		I mindre grad	I meget høj grad	I høj grad	I meget høj grad	I mindre grad	I meget høj grad	I mindre grad	I mindre grad	I meget høj grad	I meget høj grad	I høj grad	I nogen grad	I høj grad	Middel	Gode	Gode	Middel	Middel	Måske	Spadserer, cykler eller har anden lettere motion mindst 4 timer om ugen (medregn også cykling/gang til skole)	Mindre god	Ved ikke	Jeg klarer mig middelt	I nogen grad	Nej	Ja - Teknologi, byggeri og transport.		Skive Tekniske skole	0	0	0	1	0				0-10 minutter	16
Mand	17	0	0	0	0	0	0	1	i starten	I mindre grad	I mindre grad	I mindre grad	Ved ikke	I mindre grad	Slet ikke	I nogen grad	Slet ikke	I meget høj grad	Slet ikke	Ved ikke	Slet ikke	I meget høj grad	Meget dårlige	Meget dårlige	Middel	Meget dårlige	Meget dårlige	Måske	Træner hårdt og dyrker konkurrenceidræt regelmæssigt og flere gange om ugen	God	Ja	Jeg klarer mig middelt	I mindre grad	Nej	Ja - Teknologi, byggeri og transport.		Aarhus Tech	0	0	0	1	0				0-10 minutter	17
Kvinde	19	25	0	1	1	0	0	0		I nogen grad	I meget høj grad	I nogen grad	I høj grad	I høj grad	I nogen grad	I mindre grad	Slet ikke	I meget høj grad	I høj grad	I mindre grad	I høj grad	I høj grad	Gode	Gode	Gode	Gode	Middel	Nej	Dyrker motionsidræt, løber eller lignende mindst 4 timer om ugen									0	0	1	0	0				15-25 minutter	19
Mand	16	10	0	0	0	0	1	0		I nogen grad	Ved ikke	I nogen grad	Ved ikke	Slet ikke	I høj grad	Slet ikke	Slet ikke	I høj grad	Slet ikke	Slet ikke	I høj grad	Slet ikke	Ved ikke	Ved ikke	Ved ikke	Ved ikke	Ved ikke	Måske	Spadserer, cykler eller har anden lettere motion mindst 4 timer om ugen (medregn også cykling/gang til skole)	God	Ja	Jeg klarer mig godt	I høj grad	Nej	Ja - Teknologi, byggeri og transport.		EUC NVS EUX teknisk	0	0	0	1	0				0-10 minutter	16
Mand	18	15	0	0	0	0	0	1	Motionsdage	Ved ikke	I nogen grad	I nogen grad	I høj grad	I mindre grad	I høj grad	Slet ikke	Slet ikke	I høj grad	I høj grad	I høj grad	I meget høj grad	I mindre grad	Meget gode	Dårlige	Middel	Middel	Dårlige	Nej	Træner hårdt og dyrker konkurrenceidræt regelmæssigt og flere gange om ugen	Nogenlunde	Ja	Jeg klarer mig godt	I høj grad	Nej	Ja - Omsorg, sundhed og pædagogik		Aarhus Tech	0	0	0	1	0				15-25 minutter	18
Kvinde	17	10	0	0	1	0	0	0																														0	0	1	0	0				0-10 minutter	17
Mand	18	15	0	0	0	1	1	0		I meget høj grad	I nogen grad	I nogen grad	I nogen grad	I nogen grad	I høj grad	I mindre grad	I mindre grad	I nogen grad	I nogen grad	I høj grad	I høj grad	I høj grad	Middel	Middel	Middel	Meget dårlige	Ved ikke	Måske	Spadserer, cykler eller har anden lettere motion mindst 4 timer om ugen (medregn også cykling/gang til skole)	Dårlig	Ved ikke	Jeg klarer mig godt	I høj grad	Ja en gang imellem til fester	Ja - Teknologi, byggeri og transport.		Aarhus tech Dollerupvej	0	0	0	1	0				15-25 minutter	18
Kvinde	16	15	1	0	1	1	0	0		I nogen grad	I nogen grad	I mindre grad	I høj grad	I mindre grad	I meget høj grad	I mindre grad	I nogen grad	I nogen grad	I høj grad	I meget høj grad	I nogen grad	I meget høj grad	Meget gode	Gode	Gode	Ved ikke	Ved ikke	Måske	Spadserer, cykler eller har anden lettere motion mindst 4 timer om ugen (medregn også cykling/gang til skole)	Nogenlunde	Ja	Jeg klarer mig godt	I høj grad	Nej	Nej - jeg ved ikke hvilket hovedområde, jeg er tilknyttet (skriv gerne hvad din uddannelse hedder)	Mediegrafiker	Aarhus tech	0	0	0	1	0				15-25 minutter	16
Mand	18	10	0	0	1	0	0	0		I høj grad	I mindre grad	I nogen grad	I høj grad	I høj grad	I nogen grad	I nogen grad	I mindre grad	I nogen grad	I høj grad	I høj grad	I høj grad	I nogen grad	Meget gode	Middel	Meget gode	Dårlige	Meget gode	Nej	Læser, ser fjernsyn eller har anden stillesiddende beskæftigelse	Mindre god	Ja	Jeg klarer mig godt	I meget høj grad	Ja en gang imellem til fester	Ja - Omsorg, sundhed og pædagogik		SOSU Horsens	0	0	0	1	0				0-10 minutter	18
Mand	18	15	0	1	0	0	0	0		Ved ikke	Ved ikke	Ved ikke	Ved ikke	Ved ikke	Ved ikke	Ved ikke	Ved ikke	Ved ikke	I mindre grad	I mindre grad	I mindre grad	I mindre grad	Ved ikke	Ved ikke	Ved ikke	Ved ikke	Ved ikke	Nej	Læser, ser fjernsyn eller har anden stillesiddende beskæftigelse	Nogenlunde	Ved ikke	Jeg klarer mig meget godt	I meget høj grad	ja, 6-10 cigaretter om dagen	Ja - Teknologi, byggeri og transport.		EUCnord	0	0	0	1	0				15-25 minutter	18
Mand	16	10	0	0	1	0	0	0		I høj grad	I høj grad	I høj grad	I meget høj grad	I mindre grad	I meget høj grad	Slet ikke	Slet ikke	I høj grad	I nogen grad	I meget høj grad	I meget høj grad	I meget høj grad	Ved ikke	Middel	Ved ikke	Meget gode	Dårlige	Nej	Spadserer, cykler eller har anden lettere motion mindst 4 timer om ugen (medregn også cykling/gang til skole)	Nogenlunde	Ja	Jeg klarer mig middelt	I nogen grad	ja, 6-10 cigaretter om dagen	Ja - Teknologi, byggeri og transport.		Campus Bornholm	0	0	0	1	0				0-10 minutter	16
Mand	17	over 60	0	1	0	0	0	0		I høj grad	I høj grad	I høj grad	I mindre grad	I høj grad	I nogen grad	I nogen grad	I høj grad	I høj grad																				0	0	1	0	0				45 - over 60 min	17
			0	0	0	0	0	0																														0	1	0	0	0
Kvinde	16	30	0	0	0	1	0	0		I meget høj grad	I høj grad	I nogen grad	I nogen grad	I høj grad	I høj grad	Slet ikke	Slet ikke	I høj grad	I høj grad	I høj grad	I høj grad	I høj grad	Gode	Dårlige	Gode	Gode	Middel	Nej	Dyrker motionsidræt, løber eller lignende mindst 4 timer om ugen	Nogenlunde	Ved ikke	Jeg klarer mig ikke så godt	I mindre grad	Nej	Ja - Omsorg, sundhed og pædagogik		SOSU Herning	0	0	0	1	0				30-40 minutter	16
Kvinde	17	30	0	1	1	0	0	0		Slet ikke	Slet ikke	Slet ikke	Slet ikke	Slet ikke	Slet ikke	I mindre grad	I mindre grad	I nogen grad	I mindre grad	I nogen grad	I nogen grad	I nogen grad	Dårlige	Dårlige	Gode	Gode	Middel	Nej	Dyrker motionsidræt, løber eller lignende mindst 4 timer om ugen	Nogenlunde	Ja	Jeg klarer mig godt	I mindre grad	Nej	Ja - Omsorg, sundhed og pædagogik		sosu Herning	0	0	0	1	0				30-40 minutter	17
Kvinde	17	15	0	1	1	1	0	0		I nogen grad	I meget høj grad	I høj grad	I nogen grad	I mindre grad	I nogen grad	Slet ikke	Slet ikke	I meget høj grad	I nogen grad	I nogen grad	I nogen grad	I nogen grad	Gode	Middel	Middel	Middel	Dårlige	Ja	Læser, ser fjernsyn eller har anden stillesiddende beskæftigelse	Mindre god	Ved ikke	Jeg klarer mig middelt	I høj grad	ja, 6-10 cigaretter om dagen	Ja - Omsorg, sundhed og pædagogik		SOSU Herning	0	0	0	1	0				15-25 minutter	17
			0	0	0	0	0	0																														0	1	0	0	0
Kvinde	18	15	0	0	1	0	0	0		I nogen grad	I nogen grad	I nogen grad	I høj grad	I nogen grad	I nogen grad	I mindre grad	I mindre grad	I nogen grad	I nogen grad	I nogen grad	I meget høj grad	I nogen grad	Gode	Gode	Gode	Gode	Gode	Ved ikke	Læser, ser fjernsyn eller har anden stillesiddende beskæftigelse	Nogenlunde	Ved ikke	Jeg klarer mig middelt	Ved ikke	Ja en gang imellem til fester	Ja - Omsorg, sundhed og pædagogik		herning	0	0	0	1	0				15-25 minutter	18
Mand	16	10	0	1	0	1	0	0		I mindre grad	I nogen grad	I mindre grad	I høj grad	Slet ikke	I mindre grad	Slet ikke	I mindre grad	I høj grad	I høj grad	I høj grad	I nogen grad	I nogen grad	Gode	Middel	Gode	Ved ikke	Ved ikke	Nej	Træner hårdt og dyrker konkurrenceidræt regelmæssigt og flere gange om ugen	God	Ja	Jeg klarer mig middelt	I høj grad	Nej	Ja - Teknologi, byggeri og transport.		Mercantec viborg	0	0	0	1	0				0-10 minutter	16
Kvinde	17		0	0	0	0	0	0																														0	0	1	0	0					17
Kvinde	16	5	0	0	1	0	0	0		I høj grad	I høj grad	I nogen grad	I høj grad	I mindre grad	I nogen grad	I mindre grad	I nogen grad	I høj grad	I nogen grad	I høj grad	I nogen grad	I høj grad	Gode	Middel	Gode	Gode	Gode	Nej	Træner hårdt og dyrker konkurrenceidræt regelmæssigt og flere gange om ugen	God	Ved ikke	Jeg klarer mig godt	I nogen grad	Ja en gang imellem til fester	Ja - Omsorg, sundhed og pædagogik		Sosu Herning	0	0	0	1	0				0-10 minutter	16
			0	0	0	0	0	0																														0	1	0	0	0
Kvinde	17	20	1	1	1	1	1	0		I nogen grad	I meget høj grad	I høj grad	I nogen grad	I nogen grad	I mindre grad	Slet ikke	Slet ikke	I høj grad	I nogen grad	I meget høj grad	I høj grad	I nogen grad	Gode	Gode	Gode	Gode	Middel	Nej	Spadserer, cykler eller har anden lettere motion mindst 4 timer om ugen (medregn også cykling/gang til skole)	God	Ja	Jeg klarer mig godt	I meget høj grad	Nej	Ja - Omsorg, sundhed og pædagogik		Sosu Aarhus	0	0	0	1	0				15-25 minutter	17
Kvinde	16	15	1	1	1	1	0	0		I nogen grad	I høj grad	I meget høj grad	I høj grad	I nogen grad	I meget høj grad	I nogen grad	I nogen grad	I meget høj grad	I høj grad	I nogen grad	I mindre grad	I høj grad	Gode	Middel	Middel	Gode	Middel	Nej	Spadserer, cykler eller har anden lettere motion mindst 4 timer om ugen (medregn også cykling/gang til skole)	God	Ja	Jeg klarer mig meget godt	I meget høj grad	Ja, mere en 11 cigaretter om dagen	Ja - Omsorg, sundhed og pædagogik		sosu Herning	0	0	0	1	0				15-25 minutter	16
Kvinde	17	5	0	0	1	0	0	0		I mindre grad	I nogen grad	I mindre grad	I nogen grad	I høj grad	I nogen grad	I mindre grad	I nogen grad	I nogen grad	I høj grad	I høj grad	I nogen grad	I nogen grad	Gode	Middel	Gode	Middel	Middel	Ved ikke	Læser, ser fjernsyn eller har anden stillesiddende beskæftigelse	Nogenlunde	Nej	Jeg klarer mig middelt	I nogen grad	Nej	Ja - Omsorg, sundhed og pædagogik		sosu	0	0	0	1	0				0-10 minutter	17
Kvinde	16	25	0	0	1	0	1	0		I høj grad	I meget høj grad	I meget høj grad	I meget høj grad	I meget høj grad	I høj grad	I mindre grad	Slet ikke	I meget høj grad	I meget høj grad	I meget høj grad	I meget høj grad	I meget høj grad	Meget gode	Meget gode	Meget gode	Meget gode	Middel	Nej	Læser, ser fjernsyn eller har anden stillesiddende beskæftigelse	God	Ja	Jeg klarer mig middelt	I høj grad	Nej	Ja - Omsorg, sundhed og pædagogik		Sosu Aarhus	0	0	0	1	0				15-25 minutter	16
Kvinde	17	5	0	0	1	0	0	0		I nogen grad	I mindre grad	I mindre grad	I høj grad	I mindre grad	I høj grad	I mindre grad	I mindre grad	I nogen grad	I nogen grad	I meget høj grad	I høj grad	I høj grad	Gode	Middel	Gode	Gode	Ved ikke	Måske	Spadserer, cykler eller har anden lettere motion mindst 4 timer om ugen (medregn også cykling/gang til skole)	Mindre god	Ja	Jeg klarer mig godt	I nogen grad	ja, 6-10 cigaretter om dagen	Ja - Omsorg, sundhed og pædagogik		Sosu	0	0	0	1	0				0-10 minutter	17
Kvinde	17	30	1	1	1	0	0	0		I meget høj grad	I meget høj grad	I meget høj grad	I meget høj grad	I meget høj grad	I høj grad	Slet ikke	Slet ikke	I meget høj grad	I nogen grad	I nogen grad	I nogen grad	I nogen grad	Gode	Meget gode	Meget gode	Meget gode	Meget gode	Måske	Spadserer, cykler eller har anden lettere motion mindst 4 timer om ugen (medregn også cykling/gang til skole)	Nogenlunde	Ja	Jeg klarer mig meget godt	I meget høj grad	Ja en gang imellem til fester	Ja - Omsorg, sundhed og pædagogik		Sosu fyn	0	0	0	1	0				30-40 minutter	17
Mand	16	20	0	0	1	1	0	0		I nogen grad	Ved ikke	Ved ikke	I høj grad	Ved ikke	I nogen grad	Slet ikke	I nogen grad	I nogen grad	I høj grad	I høj grad	I meget høj grad	I høj grad	Gode	Middel	Gode	Ved ikke	Ved ikke	Ved ikke	Dyrker motionsidræt, løber eller lignende mindst 4 timer om ugen	God	Ved ikke	Jeg klarer mig middelt	I nogen grad	Nej	Ja - Teknologi, byggeri og transport.		Holbæk	0	0	0	1	0				15-25 minutter	16
Mand	18	40	1	0	1	0	0	0		I nogen grad	I mindre grad	Ved ikke	I nogen grad	Slet ikke	I nogen grad	I mindre grad	I mindre grad	I høj grad	I nogen grad	I nogen grad	I høj grad	I mindre grad	Middel	Gode	Middel	Gode	Dårlige	Nej	Træner hårdt og dyrker konkurrenceidræt regelmæssigt og flere gange om ugen	God	Ved ikke	Jeg klarer mig meget godt	I nogen grad	Nej	Ja - Teknologi, byggeri og transport.		Campus bornholm	0	0	0	1	0				30-40 minutter	18
			0	0	0	0	0	0																														0	1	0	0	0
Kvinde	16	10	0	0	1	0	0	0		Slet ikke	I høj grad	I høj grad	I nogen grad	I nogen grad	Ved ikke	I høj grad	Slet ikke	I høj grad	I mindre grad	I høj grad	I nogen grad	I høj grad	Middel	Gode	Gode	Meget gode	Dårlige	Ja	Dyrker motionsidræt, løber eller lignende mindst 4 timer om ugen	Nogenlunde	Nej	Jeg klarer mig godt	I høj grad	Nej	Ja - Omsorg, sundhed og pædagogik		SOSU Vejle	0	0	0	1	0				0-10 minutter	16
Mand	16	10	0	0	1	0	0	0		I meget høj grad	I nogen grad	I nogen grad	I meget høj grad	I meget høj grad	I høj grad	I mindre grad	I nogen grad	I høj grad	I meget høj grad	I meget høj grad	I meget høj grad	I meget høj grad	Meget gode	Meget gode	Meget gode	Ved ikke	Ved ikke	Nej	Træner hårdt og dyrker konkurrenceidræt regelmæssigt og flere gange om ugen	Virkelig god	Ved ikke	Jeg klarer mig godt	I nogen grad	Ja, mere en 11 cigaretter om dagen	Ja - Teknologi, byggeri og transport.		EUC holbæk	0	0	0	1	0				0-10 minutter	16
Kvinde	17	20	0	0	1	0	0	0		I høj grad	I nogen grad	I nogen grad	I høj grad	I mindre grad	I nogen grad	Slet ikke	Slet ikke	I høj grad	I høj grad	I høj grad	I høj grad	I nogen grad	Middel	Gode	Gode	Gode	Gode	Nej	Spadserer, cykler eller har anden lettere motion mindst 4 timer om ugen (medregn også cykling/gang til skole)	Dårlig	Ja	Jeg klarer mig middelt	I høj grad	Nej	Ja - Omsorg, sundhed og pædagogik		Sosu Horsens	0	0	0	1	0				15-25 minutter	17
Mand	17	30	0	0	0	0	1	0		I meget høj grad	I meget høj grad	I meget høj grad	I meget høj grad	I meget høj grad	I meget høj grad	I meget høj grad	I meget høj grad	I meget høj grad	I meget høj grad	I meget høj grad	I meget høj grad	I meget høj grad	Meget gode	Meget gode	Meget gode	Meget gode	Meget gode	Nej	Træner hårdt og dyrker konkurrenceidræt regelmæssigt og flere gange om ugen	Virkelig god	Ja	Jeg klarer mig ikke så godt	I meget høj grad	Ja, mere en 11 cigaretter om dagen	Ja - Omsorg, sundhed og pædagogik		Sosu	0	0	0	1	0				30-40 minutter	17
			0	0	0	0	0	0																														0	1	0	0	0
Kvinde	17	20	1	1	1	0	0	0		I høj grad	I høj grad	I høj grad	I høj grad	I høj grad	I nogen grad	I mindre grad	I mindre grad	I høj grad	I høj grad	I høj grad	I høj grad	I høj grad	Meget gode	Gode	Gode	Meget gode	Ved ikke	Måske	Spadserer, cykler eller har anden lettere motion mindst 4 timer om ugen (medregn også cykling/gang til skole)	Nogenlunde	Nej	Jeg klarer mig godt	I høj grad	Nej	Ja - Omsorg, sundhed og pædagogik		SOSU Aarhus	0	0	0	1	0				15-25 minutter	17
Kvinde	17	20	0	1	1	0	0	0		I meget høj grad	I meget høj grad	I meget høj grad	I meget høj grad	I meget høj grad	I meget høj grad	Slet ikke	Slet ikke	I meget høj grad	I høj grad	I nogen grad	I høj grad	I nogen grad	Dårlige	Middel	Gode	Middel	Middel	Nej	Spadserer, cykler eller har anden lettere motion mindst 4 timer om ugen (medregn også cykling/gang til skole)	Nogenlunde	Ja	Jeg klarer mig meget godt	I meget høj grad	Nej	Ja - Omsorg, sundhed og pædagogik		sosu Horsens	0	0	0	1	0				15-25 minutter	17
Mand	17	over 60	0	0	0	0	0	1	Motionsdag og bevægelse på arbejdsplads	I nogen grad	I høj grad	I nogen grad	I høj grad	I mindre grad	I høj grad	I mindre grad	I mindre grad	I høj grad	I høj grad	I høj grad	I høj grad	I mindre grad	Gode	Dårlige	Gode	Meget dårlige	Meget dårlige	Nej	Spadserer, cykler eller har anden lettere motion mindst 4 timer om ugen (medregn også cykling/gang til skole)	Nogenlunde	Ja	Jeg klarer mig meget godt	I høj grad	Ja en gang imellem til fester	Ja - Teknologi, byggeri og transport.		Aarhus tech	0	0	0	1	0				45 - over 60 min	17
Mand	18	over 60	0	0	0	0	0	0																														0	0	1	0	0				45 - over 60 min	18
Kvinde	17	35	0	1	1	0	1	0		I høj grad	I høj grad	I mindre grad	I høj grad	I høj grad	I nogen grad	Slet ikke	I nogen grad	I meget høj grad	I nogen grad	I nogen grad	I nogen grad	I høj grad	Middel	Dårlige	Gode	Gode	Middel	Nej	Dyrker motionsidræt, løber eller lignende mindst 4 timer om ugen	Virkelig god	Ja	Jeg klarer mig godt	I høj grad	Nej	Ja - Omsorg, sundhed og pædagogik		SOSU Herning	0	0	0	1	0				30-40 minutter	17
Mand	17	20	0	0	0	0	1	0		Ved ikke	I nogen grad	I høj grad	I nogen grad	Slet ikke	I mindre grad	I mindre grad	Slet ikke	I meget høj grad	Ved ikke	I mindre grad	I meget høj grad	Slet ikke	Middel	Middel	Middel	Middel	Middel	Måske	Spadserer, cykler eller har anden lettere motion mindst 4 timer om ugen (medregn også cykling/gang til skole)	Nogenlunde	Nej	Jeg klarer mig meget godt	I meget høj grad	Ja, mere en 11 cigaretter om dagen	Ja - Omsorg, sundhed og pædagogik		randers sosu	0	0	0	1	0				15-25 minutter	17
Kvinde	17	30	0	0	1	0	1	0		I nogen grad	Slet ikke	I mindre grad	Ved ikke	I mindre grad	I nogen grad	I mindre grad	I mindre grad	I mindre grad	I meget høj grad	I nogen grad	I meget høj grad	I høj grad	Meget gode	Meget gode	Gode	Dårlige	Gode	Ved ikke	Spadserer, cykler eller har anden lettere motion mindst 4 timer om ugen (medregn også cykling/gang til skole)	Mindre god	Ja	Jeg klarer mig godt	I høj grad	Nej	Ja - Omsorg, sundhed og pædagogik		sosu vejle	0	0	0	1	0				30-40 minutter	17
Mand	17	30	0	0	1	0	0	0		I nogen grad	I høj grad	I mindre grad	I nogen grad	I mindre grad	I nogen grad	Slet ikke	Slet ikke	I meget høj grad	I nogen grad	I nogen grad	I meget høj grad	I høj grad	Dårlige	Gode	Dårlige	Meget gode	Gode	Nej	Læser, ser fjernsyn eller har anden stillesiddende beskæftigelse	Mindre god	Ja	Jeg klarer mig godt	I høj grad	Ja en gang imellem til fester	Ja - Teknologi, byggeri og transport.		Campus bornholm	0	0	0	1	0				30-40 minutter	17
Mand	16	30	0	0	1	0	0	0		I nogen grad	I nogen grad	I nogen grad	I nogen grad	Slet ikke	I nogen grad	I mindre grad	I nogen grad	I nogen grad	I høj grad	I nogen grad	I nogen grad	I meget høj grad	Dårlige	Meget dårlige	Dårlige	Dårlige	Meget dårlige	Nej	Spadserer, cykler eller har anden lettere motion mindst 4 timer om ugen (medregn også cykling/gang til skole)	Nogenlunde	Ja	Jeg klarer mig godt	I mindre grad	Nej	Ja - Teknologi, byggeri og transport.		Campus Bornholm	0	0	0	1	0				30-40 minutter	16
Mand	16	10	0	0	1	0	0	0		I mindre grad	I mindre grad	I mindre grad	I mindre grad	I mindre grad	I nogen grad	I mindre grad	I mindre grad	I mindre grad	I høj grad	I høj grad	I høj grad	I høj grad	Middel	Middel	Middel	Middel	Middel	Nej	Spadserer, cykler eller har anden lettere motion mindst 4 timer om ugen (medregn også cykling/gang til skole)	Virkelig god	Nej	Jeg klarer mig middelt	I mindre grad	Ja, mere en 11 cigaretter om dagen	Ja - Teknologi, byggeri og transport.		RØNNE	0	0	0	1	0				0-10 minutter	16
Mand	16	30	1	0	0	0	0	0		Slet ikke	I nogen grad	I nogen grad	I høj grad	I mindre grad	I meget høj grad	Slet ikke	I meget høj grad	Slet ikke	Slet ikke	Slet ikke	I nogen grad	Slet ikke	Meget dårlige	Middel	Meget dårlige	Meget dårlige	Meget dårlige	Ja	Spadserer, cykler eller har anden lettere motion mindst 4 timer om ugen (medregn også cykling/gang til skole)	Nogenlunde	Ja							0	0	1	0	0				30-40 minutter	16
Kvinde	16	0	0	1	0	0	0	0																														0	0	1	0	0				0-10 minutter	16
Mand	17	35	0	0	1	0	0	0		I nogen grad	I nogen grad	I nogen grad	I meget høj grad	I høj grad	I meget høj grad	Slet ikke	I nogen grad	I nogen grad	I meget høj grad	I meget høj grad	I høj grad	I meget høj grad	Middel	Gode	Ved ikke	Middel	Ved ikke	Ja	Træner hårdt og dyrker konkurrenceidræt regelmæssigt og flere gange om ugen	Mindre god	Nej	Jeg klarer mig middelt	I høj grad	Nej	Ja - Teknologi, byggeri og transport.		EUC	0	0	0	1	0				30-40 minutter	17
Kvinde	18	20	1	1	0	1	0	0		I mindre grad	I mindre grad	I mindre grad	I nogen grad	I nogen grad	I meget høj grad	I høj grad	I høj grad	I nogen grad	I nogen grad	I nogen grad	I nogen grad	I nogen grad	Dårlige	Dårlige	Middel	Middel	Gode	Ja	Læser, ser fjernsyn eller har anden stillesiddende beskæftigelse	Nogenlunde	Ja	Jeg klarer mig godt	I høj grad	ja, 1-5 cigaretter om dagen	Ja - Omsorg, sundhed og pædagogik		Social- og sundhedskolen Esbjerg	0	0	0	1	0				15-25 minutter	18
Kvinde	16	15	1	0	1	1	1	0		I høj grad	I høj grad	I høj grad	I høj grad	Slet ikke	I mindre grad	I mindre grad	I mindre grad	I høj grad	I høj grad	I meget høj grad	I meget høj grad	I nogen grad	Middel	Dårlige	Gode	Gode	Middel	Nej	Spadserer, cykler eller har anden lettere motion mindst 4 timer om ugen (medregn også cykling/gang til skole)	Nogenlunde	Ved ikke	Ved ikke	I høj grad	ja, 1-5 cigaretter om dagen	Ja - Omsorg, sundhed og pædagogik		Horsens	0	0	0	1	0				15-25 minutter	16
Mand	18	20	0	0	1	0	0	0		I høj grad	I nogen grad	I meget høj grad	I nogen grad	Slet ikke	I mindre grad	I mindre grad	Slet ikke	I høj grad	I høj grad	I høj grad	I meget høj grad	I høj grad	Dårlige	Meget dårlige	Meget dårlige	Meget dårlige	Gode	Nej	Spadserer, cykler eller har anden lettere motion mindst 4 timer om ugen (medregn også cykling/gang til skole)	Mindre god	Ja	Jeg klarer mig godt	I nogen grad	Nej	Ja - Fødevarer, jordbrug og oplevelser		Tech	0	0	0	1	0				15-25 minutter	18
Kvinde	17	20	1	1	1	0	0	0		I meget høj grad	Slet ikke	I høj grad	I meget høj grad	I nogen grad	I nogen grad	I mindre grad	Slet ikke	I meget høj grad	I mindre grad	I mindre grad	I meget høj grad	I høj grad	Gode	Gode	Middel	Meget gode	Meget gode	Ja	Læser, ser fjernsyn eller har anden stillesiddende beskæftigelse	Nogenlunde	Ja	Jeg klarer mig meget godt	I høj grad	Ja en gang imellem til fester	Ja - Omsorg, sundhed og pædagogik		Randers social- og sundhedsskole	0	0	0	1	0				15-25 minutter	17
Kvinde	16	15	1	0	1	0	1	0		I høj grad	I høj grad	I nogen grad	I høj grad	I høj grad	I høj grad	I mindre grad	I mindre grad	I høj grad	I meget høj grad	I nogen grad	I nogen grad	I høj grad	Gode	Middel	Gode	Meget gode	Middel	Nej	Træner hårdt og dyrker konkurrenceidræt regelmæssigt og flere gange om ugen	God	Ved ikke	Jeg klarer mig godt	I høj grad	Nej	Ja - Omsorg, sundhed og pædagogik		SOSU Horsens	0	0	0	1	0				15-25 minutter	16
Kvinde	17	10	0	1	0	0	0	0		I høj grad	I mindre grad	I nogen grad	I høj grad	Ved ikke	Ved ikke	Ved ikke	Slet ikke	I høj grad	I høj grad	I høj grad	I mindre grad	I nogen grad	Ved ikke	Ved ikke	Ved ikke	Gode	Ved ikke	Nej	Dyrker motionsidræt, løber eller lignende mindst 4 timer om ugen	Dårlig	Ja	Jeg klarer mig slet ikke godt	I nogen grad	Nej	Ja - Omsorg, sundhed og pædagogik		sosu herning	0	0	0	1	0				0-10 minutter	17
Mand	17	0	0	1	0	0	0	0		I nogen grad	Slet ikke	I nogen grad	I nogen grad	Slet ikke	I nogen grad	Slet ikke	I mindre grad	I nogen grad	I nogen grad	I nogen grad	I nogen grad	I nogen grad	Gode	Gode	Dårlige	Dårlige	Middel	Ja	Dyrker motionsidræt, løber eller lignende mindst 4 timer om ugen	Nogenlunde	Ja	Jeg klarer mig godt	I mindre grad	ja, 6-10 cigaretter om dagen	Ja - Teknologi, byggeri og transport.		Euc nordvestsjælland Holbæk	0	0	0	1	0				0-10 minutter	17
Mand	16	30	0	1	0	0	0	0		I høj grad	I meget høj grad	I meget høj grad	I meget høj grad	I nogen grad	I meget høj grad	Slet ikke	Slet ikke	I meget høj grad	I nogen grad	I nogen grad	I mindre grad	Slet ikke	Gode	Meget gode	Middel	Middel	Middel	Nej	Læser, ser fjernsyn eller har anden stillesiddende beskæftigelse	Nogenlunde	Ja	Jeg klarer mig middelt	I meget høj grad	ja, 1-5 cigaretter om dagen	Ja - Omsorg, sundhed og pædagogik		SOSU Esbjerg	0	0	0	1	0				30-40 minutter	16
Kvinde	16	35	0	1	0	1	1	0		I høj grad	I nogen grad	I nogen grad	I nogen grad	Slet ikke	I meget høj grad	I høj grad	I nogen grad	I nogen grad	I nogen grad	I nogen grad	I nogen grad	I nogen grad	Middel	Middel	Gode	Gode	Middel	Ja	Spadserer, cykler eller har anden lettere motion mindst 4 timer om ugen (medregn også cykling/gang til skole)	Nogenlunde	Nej	Jeg klarer mig godt	I nogen grad	ja, 6-10 cigaretter om dagen	Ja - Omsorg, sundhed og pædagogik		SOSU Herning	0	0	0	1	0				30-40 minutter	16
Kvinde	18	10	0	0	1	1	0	0		I nogen grad	I høj grad	I høj grad	I nogen grad	I høj grad	I høj grad	I mindre grad	I mindre grad	I nogen grad	I høj grad	I nogen grad	I høj grad	I nogen grad	Middel	Ved ikke	Ved ikke	Ved ikke	Ved ikke	Nej	Læser, ser fjernsyn eller har anden stillesiddende beskæftigelse	Nogenlunde	Ja	Jeg klarer mig godt	I høj grad	Nej	Ja - Teknologi, byggeri og transport.		Aarhus tech	0	0	0	1	0				0-10 minutter	18
Kvinde	18	30	1	1	1	1	0	0		I høj grad	I meget høj grad	I høj grad	I meget høj grad	Ved ikke	I høj grad	Slet ikke	Ved ikke	I meget høj grad	I høj grad	I høj grad	I nogen grad	Slet ikke	Meget gode	Meget gode	Meget gode	Meget gode	Meget gode	Ved ikke	Træner hårdt og dyrker konkurrenceidræt regelmæssigt og flere gange om ugen	God	Ja	Jeg klarer mig middelt	I nogen grad	Nej	Ja - Omsorg, sundhed og pædagogik		sosu herning	0	0	0	1	0				30-40 minutter	18
Kvinde	17	10	0	1	1	1	0	0		I meget høj grad	I meget høj grad	I meget høj grad	I meget høj grad	I mindre grad	I nogen grad	Slet ikke	Ved ikke	I meget høj grad	I meget høj grad	I meget høj grad	I mindre grad	I meget høj grad	Middel	Middel	Meget gode	Gode	Dårlige	Nej	Træner hårdt og dyrker konkurrenceidræt regelmæssigt og flere gange om ugen	God	Ved ikke	Jeg klarer mig godt	I meget høj grad	Nej	Ja - Omsorg, sundhed og pædagogik		Social- og sundhedsskolen Herning	0	0	0	1	0				0-10 minutter	17
Mand	100	50	1	0	0	0	0	0		I mindre grad	Slet ikke	I mindre grad	I mindre grad	Slet ikke	I nogen grad	Slet ikke	I nogen grad	I mindre grad	I mindre grad	I nogen grad	I nogen grad	I mindre grad	Middel	Middel	Middel	Middel	Middel	Ja	Dyrker motionsidræt, løber eller lignende mindst 4 timer om ugen	Nogenlunde	Nej	Jeg klarer mig middelt	I høj grad	Ja, mere en 11 cigaretter om dagen	Ja - Teknologi, byggeri og transport.		Aarhus tech	0	0	0	1	0				45 - over 60 min
Mand	17	over 60	0	0	1	1	1	0		I meget høj grad	I høj grad	I nogen grad	I meget høj grad	Ved ikke	I nogen grad	Slet ikke	Ved ikke	I meget høj grad	Ved ikke	Ved ikke	Ved ikke	Ved ikke	Dårlige	Middel	Middel	Dårlige	Dårlige	Nej	Læser, ser fjernsyn eller har anden stillesiddende beskæftigelse	Nogenlunde	Ja	Jeg klarer mig meget godt	I mindre grad	Nej	Ja - Teknologi, byggeri og transport.		euc nvs holbæk	0	0	0	1	0				45 - over 60 min	17
Kvinde	17	30	0	1	0	0	0	0		I meget høj grad	I meget høj grad	I meget høj grad	I nogen grad	I meget høj grad	I meget høj grad	I mindre grad	Slet ikke	I meget høj grad	I høj grad	I meget høj grad	I meget høj grad	I meget høj grad	Meget gode	Gode	Meget gode	Gode	Meget gode	Nej	Spadserer, cykler eller har anden lettere motion mindst 4 timer om ugen (medregn også cykling/gang til skole)	God	Ja	Jeg klarer mig middelt	I høj grad	Nej	Ja - Omsorg, sundhed og pædagogik		sosu randers	0	0	0	1	0				30-40 minutter	17
Kvinde	18	15	0	0	1	1	0	0		I høj grad	I meget høj grad	Ved ikke	I nogen grad	I nogen grad	I nogen grad	I mindre grad	Ved ikke	I høj grad	I høj grad	I nogen grad	I høj grad	I høj grad	Gode	Ved ikke	Gode	Gode	Gode	Ved ikke	Spadserer, cykler eller har anden lettere motion mindst 4 timer om ugen (medregn også cykling/gang til skole)	Nogenlunde	Ved ikke	Jeg klarer mig middelt	I nogen grad	Nej	Ja - Omsorg, sundhed og pædagogik		Sosu Herning	0	0	0	1	0				15-25 minutter	18
			0	0	0	0	0	0																														0	1	0	0	0
Kvinde	17	30	1	0	0	0	0	0		I nogen grad	I nogen grad	I nogen grad	I nogen grad	I mindre grad	I mindre grad	I nogen grad	Slet ikke	I nogen grad	I nogen grad	I mindre grad	I nogen grad	I høj grad	Gode	Gode	Gode	Gode	Middel	Måske	Spadserer, cykler eller har anden lettere motion mindst 4 timer om ugen (medregn også cykling/gang til skole)	Mindre god	Ved ikke	Jeg klarer mig godt	I høj grad	Nej	Ja - Omsorg, sundhed og pædagogik		Odense social- og sundhedskole	0	0	0	1	0				30-40 minutter	17
Kvinde	93	0	0	0	0	0	0	1	ALDRIG	Slet ikke	Slet ikke	Slet ikke	Slet ikke	Slet ikke	Slet ikke	Slet ikke	Slet ikke	Slet ikke	Slet ikke	Slet ikke	Slet ikke	Slet ikke	Meget dårlige	Meget dårlige	Meget dårlige	Meget dårlige	Meget dårlige	Nej	Læser, ser fjernsyn eller har anden stillesiddende beskæftigelse	Virkelig god	Nej	Jeg klarer mig slet ikke godt	Slet ikke	Ja, mere en 11 cigaretter om dagen	Nej - jeg ved ikke hvilket hovedområde, jeg er tilknyttet (skriv gerne hvad din uddannelse hedder)	STRIPPER	AALBORG TECH	0	0	0	1	0				0-10 minutter
Mand	18	5	1	0	1	0	0	0		Slet ikke	I høj grad	Slet ikke	Slet ikke	I nogen grad	Slet ikke	I høj grad	I høj grad	Slet ikke	Slet ikke	Slet ikke	Slet ikke	Slet ikke	Middel	Gode	Middel	Dårlige	Dårlige	Nej	Dyrker motionsidræt, løber eller lignende mindst 4 timer om ugen	God	Ja	Jeg klarer mig meget godt	I nogen grad	Nej	Ja - Teknologi, byggeri og transport.		EUCNVS	0	0	0	1	0				0-10 minutter	18
Kvinde	16	5	1	0	0	0	0	0		I høj grad	I høj grad	I høj grad	I høj grad	I høj grad	I høj grad	Slet ikke	Slet ikke	I høj grad	I meget høj grad	I meget høj grad	I meget høj grad	I meget høj grad	Gode	Gode	Gode	Gode	Gode	Nej										0	0	1	0	0				0-10 minutter	16
Mand	17	0	0	1	1	0	0	0		I meget høj grad	I meget høj grad	I meget høj grad	I meget høj grad	Slet ikke	Ved ikke	Slet ikke	I meget høj grad	I meget høj grad	I nogen grad	I meget høj grad	I meget høj grad	Ved ikke	Meget gode	Meget gode	Meget gode	Meget gode	Meget gode	Nej	Træner hårdt og dyrker konkurrenceidræt regelmæssigt og flere gange om ugen	God	Ja	Jeg klarer mig middelt	I meget høj grad	Nej	Ja - Omsorg, sundhed og pædagogik		Social og sundhedsskolen Horsens	0	0	0	1	0				0-10 minutter	17
Kvinde	17	5	0	0	1	0	0	0		I mindre grad	I mindre grad	I mindre grad	I nogen grad	I nogen grad	I høj grad	I mindre grad	I mindre grad	I høj grad	I nogen grad	I nogen grad	I nogen grad	I nogen grad	Ved ikke	Ved ikke	Ved ikke	Ved ikke	Ved ikke	Nej	Spadserer, cykler eller har anden lettere motion mindst 4 timer om ugen (medregn også cykling/gang til skole)									0	0	1	0	0				0-10 minutter	17
			0	0	0	0	0	0																														0	1	0	0	0
Mand	17	5	1	0	0	1	0	0		I mindre grad	Slet ikke	Slet ikke	I nogen grad	Slet ikke	I nogen grad	I meget høj grad	I nogen grad	I meget høj grad	I mindre grad	Slet ikke	Slet ikke	I meget høj grad	Gode	Meget dårlige	Meget dårlige	Dårlige	Meget dårlige	Måske	Spadserer, cykler eller har anden lettere motion mindst 4 timer om ugen (medregn også cykling/gang til skole)	Nogenlunde	Ved ikke	Jeg klarer mig godt	I høj grad	Nej	Ja - Teknologi, byggeri og transport.		Aarhus tech	0	0	0	1	0				0-10 minutter	17
			0	0	0	0	0	0																														0	1	0	0	0
			0	0	0	0	0	0																														0	1	0	0	0
			0	0	0	0	0	0																														0	1	0	0	0
Mand	17	5	0	0	0	1	0	0		I nogen grad	I nogen grad	I nogen grad	I nogen grad	I nogen grad	I nogen grad	I nogen grad	I nogen grad	I nogen grad	Slet ikke	Slet ikke	Slet ikke	Slet ikke	Meget gode	Meget gode	Meget gode	Meget gode	Meget gode	Nej	Læser, ser fjernsyn eller har anden stillesiddende beskæftigelse	Virkelig god	Nej	Jeg klarer mig meget godt	I meget høj grad	Ja en gang imellem til fester	Ja - Teknologi, byggeri og transport.		celf	0	0	0	1	0				0-10 minutter	17
Kvinde	16	30	0	0	1	0	0	0		I meget høj grad	I høj grad	Slet ikke	I nogen grad	Slet ikke	Slet ikke	I nogen grad	Ved ikke	I nogen grad																				0	0	1	0	0				30-40 minutter	16
Kvinde	17	25	0	1	1	0	0	0		I meget høj grad	I meget høj grad	I høj grad	I meget høj grad	I nogen grad	I nogen grad	Slet ikke	Slet ikke	I meget høj grad	I nogen grad	I nogen grad	I høj grad	I høj grad	Gode	Gode	Gode	Meget gode	Gode	Ved ikke	Dyrker motionsidræt, løber eller lignende mindst 4 timer om ugen	Nogenlunde	Ja	Jeg klarer mig godt	I høj grad	Nej	Ja - Omsorg, sundhed og pædagogik		SOSU Randers	0	0	0	1	0				15-25 minutter	17
Kvinde	20	30	0	0	0	0	0	0																														0	0	1	0	0				30-40 minutter
			0	0	0	0	0	0																														0	1	0	0	0
Mand	16	5	0	0	1	0	0	0		I meget høj grad	I meget høj grad	I meget høj grad	I meget høj grad	I meget høj grad	I meget høj grad	Slet ikke	Slet ikke	I meget høj grad	I høj grad	I meget høj grad	I meget høj grad	I meget høj grad	Middel	Middel	Middel	Middel	Middel	Måske	Træner hårdt og dyrker konkurrenceidræt regelmæssigt og flere gange om ugen	Virkelig god	Ja	Jeg klarer mig meget godt	I høj grad	Nej	Ja - Teknologi, byggeri og transport.		euc	0	0	0	1	0				0-10 minutter	16
Kvinde	17	10	0	0	1	1	0	0		I høj grad	I nogen grad	I nogen grad	I høj grad	I høj grad	I høj grad	I mindre grad	Ved ikke	I høj grad	I nogen grad	I høj grad	I høj grad	I høj grad	Middel	Gode	Gode	Gode	Middel	Nej	Træner hårdt og dyrker konkurrenceidræt regelmæssigt og flere gange om ugen	Nogenlunde	Ja	Jeg klarer mig middelt	I nogen grad	Nej	Ja - Omsorg, sundhed og pædagogik		Sosu Horsens	0	0	0	1	0				0-10 minutter	17
Kvinde	16	15	0	0	1	0	0	1	Morgen-/eftermiddags motion	Ved ikke	I høj grad	I nogen grad	I meget høj grad	I nogen grad	I høj grad	Slet ikke	Slet ikke	I høj grad	I høj grad	I nogen grad	I nogen grad	I høj grad	Gode	Gode	Gode	Gode	Ved ikke	Nej	Dyrker motionsidræt, løber eller lignende mindst 4 timer om ugen	Nogenlunde	Ja	Jeg klarer mig godt	Ved ikke	Nej	Ja - Omsorg, sundhed og pædagogik		Sosu Aarhus	0	0	0	1	0				15-25 minutter	16
Kvinde	16	5	1	0	0	0	0	0		Slet ikke	I meget høj grad	I meget høj grad	Slet ikke	I meget høj grad	I meget høj grad	Slet ikke	Slet ikke	I meget høj grad	I meget høj grad	I meget høj grad	I meget høj grad	I meget høj grad	Gode	Gode	Gode	Gode	Gode	Nej	Spadserer, cykler eller har anden lettere motion mindst 4 timer om ugen (medregn også cykling/gang til skole)	Nogenlunde	Ja	Jeg klarer mig godt	I høj grad	Nej	Ja - Fødevarer, jordbrug og oplevelser		Aarhustrch	0	0	0	1	0				0-10 minutter	16
Mand	16	0	1	0	0	0	1	0		I meget høj grad	I meget høj grad	I meget høj grad	I meget høj grad	I meget høj grad	I meget høj grad	I meget høj grad	I meget høj grad	I meget høj grad																				0	0	1	0	0				0-10 minutter	16
Kvinde	16	25	0	1	1	0	0	0		I nogen grad	I høj grad	I nogen grad	I meget høj grad	I mindre grad	I nogen grad	I nogen grad	Slet ikke	I meget høj grad	I nogen grad	I høj grad	I meget høj grad	I høj grad	Meget gode	Meget gode	Meget gode	Meget gode	Meget gode	Ja	Spadserer, cykler eller har anden lettere motion mindst 4 timer om ugen (medregn også cykling/gang til skole)	Mindre god	Ved ikke	Jeg klarer mig godt	I nogen grad	Nej	Ja - Omsorg, sundhed og pædagogik		Sosu Randers	0	0	0	1	0				15-25 minutter	16
Mand	16	30	1	0	1	0	0	0		I meget høj grad	I nogen grad	I nogen grad	I høj grad	I mindre grad	I nogen grad	I mindre grad	I nogen grad	I høj grad	I høj grad	I nogen grad	I høj grad	I nogen grad	Dårlige	Middel	Dårlige	Meget gode	Ved ikke	Nej	Dyrker motionsidræt, løber eller lignende mindst 4 timer om ugen	Nogenlunde	Ja	Jeg klarer mig meget godt	I høj grad	Nej	Ja - Teknologi, byggeri og transport.		euc	0	0	0	1	0				30-40 minutter	16
			0	0	0	0	0	0																														0	1	0	0	0
Kvinde	17	25	0	1	0	0	0	0		Ved ikke	I nogen grad	I mindre grad	I nogen grad	Ved ikke	I nogen grad	I mindre grad	Ved ikke	I mindre grad	I nogen grad	I høj grad	I høj grad	I meget høj grad	Middel	Dårlige	Middel	Gode	Middel	Nej	Spadserer, cykler eller har anden lettere motion mindst 4 timer om ugen (medregn også cykling/gang til skole)	Mindre god	Ved ikke	Jeg klarer mig middelt	I nogen grad	ja, 1-5 cigaretter om dagen	Ja - Omsorg, sundhed og pædagogik		Sosu Herning	0	0	0	1	0				15-25 minutter	17
Kvinde	17	10	0	1	1	0	0	0		I nogen grad	I nogen grad	I nogen grad	I nogen grad	I mindre grad	I meget høj grad	I meget høj grad	I nogen grad	I meget høj grad																				0	0	1	0	0				0-10 minutter	17
Kvinde	16	30	0	0	1	0	1	0		I høj grad	I høj grad	I nogen grad	I høj grad	I mindre grad	I nogen grad	Slet ikke	I mindre grad	I høj grad	I nogen grad	I høj grad	I meget høj grad	I nogen grad	Gode	Ved ikke	Gode	Gode	Gode	Nej	Spadserer, cykler eller har anden lettere motion mindst 4 timer om ugen (medregn også cykling/gang til skole)	Nogenlunde	Ved ikke	Jeg klarer mig middelt	I nogen grad	Nej	Ja - Omsorg, sundhed og pædagogik		SOSU	0	0	0	1	0				30-40 minutter	16
Kvinde	18	5	0	1	0	0	0	0		I høj grad	I nogen grad	I nogen grad	I nogen grad	I mindre grad	I mindre grad	I nogen grad	I mindre grad	I nogen grad	I nogen grad	I nogen grad	I nogen grad	I høj grad	Gode	Middel	Dårlige	Gode	Gode	Måske	Træner hårdt og dyrker konkurrenceidræt regelmæssigt og flere gange om ugen	Nogenlunde	Ja	Jeg klarer mig meget godt	I mindre grad	Ja, mere en 11 cigaretter om dagen	Nej - jeg ved ikke hvilket hovedområde, jeg er tilknyttet (skriv gerne hvad din uddannelse hedder)	Sosu	Sosu fyn	0	0	0	1	0				0-10 minutter	18
Kvinde	16	10	0	0	1	0	0	1	Morgenaktivitet og eftermiddagsaktivitet	I meget høj grad	I nogen grad	I nogen grad	I meget høj grad	I nogen grad	I meget høj grad	I høj grad	Slet ikke	I meget høj grad	I meget høj grad	I meget høj grad	I meget høj grad	I meget høj grad	Gode	Meget gode	Gode	Meget gode	Middel	Måske	Læser, ser fjernsyn eller har anden stillesiddende beskæftigelse	Dårlig	Ja	Jeg klarer mig godt	I meget høj grad	Nej	Ja - Omsorg, sundhed og pædagogik		Sosu Aarhus	0	0	0	1	0				0-10 minutter	16
Mand	17	5	0	0	0	1	1	0		I meget høj grad	I meget høj grad	I meget høj grad	I meget høj grad	I høj grad	I meget høj grad	Slet ikke	Slet ikke	I meget høj grad	I høj grad	I nogen grad	I høj grad	Slet ikke	Meget dårlige	Gode	Gode	Gode	Meget dårlige	Nej	Dyrker motionsidræt, løber eller lignende mindst 4 timer om ugen	God	Ja	Jeg klarer mig godt	I høj grad	Ja en gang imellem til fester				0	0	1	0	0				0-10 minutter	17
Kvinde	18	30	0	0	1	0	1	0		I høj grad	I høj grad	I høj grad	I meget høj grad	I nogen grad	I høj grad	Slet ikke	I meget høj grad	I høj grad	I høj grad	I høj grad	I meget høj grad	I høj grad	Middel	Gode	Middel	Gode	Middel	Nej	Spadserer, cykler eller har anden lettere motion mindst 4 timer om ugen (medregn også cykling/gang til skole)	God	Ja	Jeg klarer mig godt	I høj grad	Nej	Ja - Omsorg, sundhed og pædagogik		SOSU Aarhus	0	0	0	1	0				30-40 minutter	18
Kvinde	18	20	1	0	0	1	0	0																														0	0	1	0	0				15-25 minutter	18
Mand	16	5	0	0	1	0	0	0		I meget høj grad	I nogen grad	I nogen grad	I meget høj grad	I nogen grad	I høj grad	I mindre grad	I mindre grad	I høj grad	I nogen grad	I meget høj grad	I meget høj grad	I høj grad	Meget gode	Gode	Gode	Middel	Middel	Nej	Dyrker motionsidræt, løber eller lignende mindst 4 timer om ugen	Nogenlunde	Ja	Jeg klarer mig godt	I høj grad	Ja en gang imellem til fester	Ja - Teknologi, byggeri og transport.		Aarhus	0	0	0	1	0				0-10 minutter	16
Mand	17	0	0	0	0	0	0	1	Første del af gf1	I meget høj grad	I meget høj grad	I meget høj grad	I meget høj grad	Ved ikke	I meget høj grad	I meget høj grad	Slet ikke	I meget høj grad	I høj grad	I nogen grad	Ved ikke	I nogen grad	Meget dårlige	Meget dårlige	Meget gode	Meget dårlige	Meget dårlige	Ja	Spadserer, cykler eller har anden lettere motion mindst 4 timer om ugen (medregn også cykling/gang til skole)	Mindre god	Ja	Jeg klarer mig meget godt	I mindre grad	Nej	Ja - Teknologi, byggeri og transport.		Euc	0	0	0	1	0				0-10 minutter	17
Mand	17	10	1	1	1	0	1	0		I mindre grad	I nogen grad	I høj grad	I høj grad	I høj grad	I høj grad	I nogen grad	I høj grad	I høj grad	I mindre grad	Slet ikke	I nogen grad	I høj grad	Middel	Meget dårlige	Middel	Ved ikke	Middel	Ved ikke	Dyrker motionsidræt, løber eller lignende mindst 4 timer om ugen	God	Ved ikke	Jeg klarer mig godt	I nogen grad	Ja en gang imellem til fester	Ja - Omsorg, sundhed og pædagogik		aalborg tech	0	0	0	1	0				0-10 minutter	17
Kvinde	17	15	0	1	1	0	0	1	Morgenaktivitet	I nogen grad	I høj grad	I nogen grad	I høj grad	I nogen grad	I høj grad	I mindre grad	Ved ikke	I høj grad	I nogen grad	I høj grad	I meget høj grad	I høj grad	Gode	Gode	Meget gode	Meget gode	Middel	Nej	Spadserer, cykler eller har anden lettere motion mindst 4 timer om ugen (medregn også cykling/gang til skole)	Nogenlunde	Ja	Jeg klarer mig middelt						0	0	1	0	0				15-25 minutter	17
Kvinde	18	15	0	0	1	0	0	0		I nogen grad	I mindre grad	I nogen grad	I nogen grad	Slet ikke	I mindre grad	I mindre grad	I mindre grad	I nogen grad	I nogen grad	I nogen grad	I nogen grad	I meget høj grad	Middel	Middel	Middel	Meget dårlige	Middel	Ja	Spadserer, cykler eller har anden lettere motion mindst 4 timer om ugen (medregn også cykling/gang til skole)	Nogenlunde	Ja	Jeg klarer mig godt	I mindre grad	Nej	Ja - Fødevarer, jordbrug og oplevelser		Aalborg tech food	0	0	0	1	0				15-25 minutter	18
Mand	17	over 60	1	0	0	1	1	0		I nogen grad	I meget høj grad	I meget høj grad	I meget høj grad	I mindre grad	I meget høj grad	Slet ikke	Slet ikke	I meget høj grad	I nogen grad	I meget høj grad	I meget høj grad	I meget høj grad	Middel	Middel	Gode	Ved ikke	Ved ikke	Nej	Dyrker motionsidræt, løber eller lignende mindst 4 timer om ugen	God	Ja	Jeg klarer mig middelt	I meget høj grad	Nej	Ja - Teknologi, byggeri og transport.		EUC	0	0	0	1	0				45 - over 60 min	17
			0	0	0	0	0	0																														0	1	0	0	0
Mand	17	20	0	0	0	0	1	0		I nogen grad	I mindre grad	Slet ikke	I nogen grad	Slet ikke	I høj grad	I mindre grad	Slet ikke	I høj grad	I høj grad	I høj grad	I høj grad	I høj grad	Meget gode	Middel	Gode	Dårlige	Dårlige	Ja	Læser, ser fjernsyn eller har anden stillesiddende beskæftigelse	Nogenlunde	Ved ikke	Jeg klarer mig godt	I mindre grad	Nej	Ja - Teknologi, byggeri og transport.		Århus tech	0	0	0	1	0				15-25 minutter	17
Mand	17	40	0	0	1	0	0	0		I høj grad	I nogen grad	I nogen grad	I meget høj grad	I mindre grad	I nogen grad	I mindre grad	I nogen grad	I høj grad	I høj grad	I nogen grad	I nogen grad	I høj grad	Middel	Middel	Gode	Middel	Meget dårlige	Nej	Dyrker motionsidræt, løber eller lignende mindst 4 timer om ugen	God	Nej	Jeg klarer mig godt	I høj grad	Nej	Ja - Teknologi, byggeri og transport.		EUC NORD frederikshavn	0	0	0	1	0				30-40 minutter	17
Mand	16	0	0	0	0	0	0	1	Ingen	I høj grad	I meget høj grad	I høj grad	I meget høj grad	I høj grad	I høj grad	Slet ikke	I meget høj grad	I meget høj grad	I mindre grad	I meget høj grad	I mindre grad	I nogen grad	Meget gode	Gode	Meget gode	Gode	Meget dårlige	Nej	Læser, ser fjernsyn eller har anden stillesiddende beskæftigelse	Dårlig	Nej	Jeg klarer mig slet ikke godt	I høj grad	Nej	Ja - Teknologi, byggeri og transport.		Aarhus trch	0	0	0	1	0				0-10 minutter	16
Kvinde	18	25	1	1	1	0	1	0		Slet ikke	I høj grad	Slet ikke	I høj grad	I høj grad	Slet ikke	Slet ikke	Slet ikke	I meget høj grad	I nogen grad	I meget høj grad	I høj grad	I meget høj grad	Middel	Middel	Gode	Middel	Gode	Nej	Dyrker motionsidræt, løber eller lignende mindst 4 timer om ugen	Nogenlunde	Ja	Jeg klarer mig middelt	I høj grad	Nej	Ja - Omsorg, sundhed og pædagogik		Horsens Sosu	0	0	0	1	0				15-25 minutter	18
Mand	15	40	0	0	0	0	1	0		I høj grad	I høj grad	Slet ikke	I nogen grad	Slet ikke	I mindre grad	I mindre grad	I mindre grad	I høj grad	I mindre grad	I høj grad	I nogen grad	I høj grad	Middel	Middel	Dårlige	Middel	Middel	Nej	Dyrker motionsidræt, løber eller lignende mindst 4 timer om ugen	Nogenlunde	Ja	Jeg klarer mig meget godt	I høj grad	Ja en gang imellem til fester	Ja - Teknologi, byggeri og transport.		Aarhus Tech	0	0	0	1	0				30-40 minutter	15
			0	0	0	0	0	0																														0	1	0	0	0
Kvinde	17	10	0	0	1	0	1	0		I mindre grad	I nogen grad	Slet ikke	I meget høj grad	I mindre grad	I nogen grad	I mindre grad	I mindre grad	I meget høj grad	I meget høj grad	I meget høj grad	I meget høj grad	I mindre grad	Meget gode	Meget dårlige	Meget gode	Meget dårlige	Meget dårlige	Nej	Læser, ser fjernsyn eller har anden stillesiddende beskæftigelse	Nogenlunde	Ja	Jeg klarer mig godt	I høj grad	Nej	Ja - Omsorg, sundhed og pædagogik		SOSU skolen Horsens	0	0	0	1	0				0-10 minutter	17
Kvinde	17	5	0	0	1	0	0	0																														0	0	1	0	0				0-10 minutter	17
Kvinde	17	30	1	1	1	0	0	0		I meget høj grad	I meget høj grad	I høj grad	I meget høj grad	I høj grad	I meget høj grad	Slet ikke	Slet ikke	I meget høj grad	I høj grad	I meget høj grad	I meget høj grad	I høj grad	Gode	Meget gode	Meget gode	Gode	Middel	Nej	Dyrker motionsidræt, løber eller lignende mindst 4 timer om ugen	God	Ved ikke	Jeg klarer mig godt	I meget høj grad	Nej	Ja - Omsorg, sundhed og pædagogik		SoSu Horsens	0	0	0	1	0				30-40 minutter	17
Mand	16	15	0	0	1	0	1	0		I meget høj grad	I meget høj grad	I meget høj grad	I høj grad	I meget høj grad	I meget høj grad	Slet ikke	Ved ikke	I meget høj grad	I meget høj grad	I meget høj grad	I meget høj grad	I høj grad	Meget gode	Gode	Gode	Meget gode	Meget gode	Ja	Dyrker motionsidræt, løber eller lignende mindst 4 timer om ugen	Nogenlunde	Ja	Jeg klarer mig middelt	I høj grad	Ja en gang imellem til fester	Ja - Omsorg, sundhed og pædagogik		SOSU Aarhus	0	0	0	1	0				15-25 minutter	16
Kvinde	17	15	0	1	0	0	1	0		I meget høj grad	I høj grad	I høj grad	I meget høj grad	I nogen grad	I nogen grad	I nogen grad	Slet ikke	I meget høj grad	I høj grad	I høj grad	I meget høj grad	I nogen grad	Gode	Meget gode	Meget gode	Gode	Gode	Nej	Spadserer, cykler eller har anden lettere motion mindst 4 timer om ugen (medregn også cykling/gang til skole)	Nogenlunde	Ja	Jeg klarer mig godt	I nogen grad	Nej	Nej - jeg ved ikke hvilket hovedområde, jeg er tilknyttet (skriv gerne hvad din uddannelse hedder)	Tandklinikassistent	Rybners teknisk skole	0	0	0	1	0				15-25 minutter	17
Kvinde	16	5	1	0	0	1	1	0		I meget høj grad	I meget høj grad	I meget høj grad	I meget høj grad	I meget høj grad	I meget høj grad	Slet ikke	I nogen grad	I meget høj grad	I meget høj grad	I meget høj grad	I meget høj grad	I meget høj grad	Gode	Meget gode	Meget gode	Meget gode	Meget gode	Nej	Træner hårdt og dyrker konkurrenceidræt regelmæssigt og flere gange om ugen	Virkelig god	Ja							0	0	1	0	0				0-10 minutter	16
Mand	17	15	0	0	1	0	0	0		Ved ikke	Ved ikke	Ved ikke	I nogen grad	Slet ikke	I nogen grad	I mindre grad	I nogen grad	I nogen grad	I mindre grad	Ved ikke	I mindre grad	I nogen grad	Middel	Gode	Meget gode	Ved ikke	Middel	Ved ikke	Læser, ser fjernsyn eller har anden stillesiddende beskæftigelse	Mindre god	Ved ikke	Jeg klarer mig meget godt	I meget høj grad	Nej	Ja - Teknologi, byggeri og transport.		aarhus tech	0	0	0	1	0				15-25 minutter	17
Kvinde	17	15	0	0	1	1	0	1	Vi har nogle gange gået ture i skolen, når vi havde undervisning.	Ved ikke	Ved ikke	Ved ikke	I høj grad	Ved ikke	I meget høj grad	Slet ikke	I mindre grad	I meget høj grad	I meget høj grad	I meget høj grad	I meget høj grad	I høj grad	Middel	Middel	Middel	Middel	Middel	Ved ikke	Læser, ser fjernsyn eller har anden stillesiddende beskæftigelse	Dårlig	Ja	Jeg klarer mig godt	I høj grad	Nej	Ja - Omsorg, sundhed og pædagogik		Horsens, SOSU	0	0	0	1	0				15-25 minutter	17
Kvinde	16	40	1	0	1	0	0	0		Slet ikke	I meget høj grad	I høj grad	I nogen grad	I nogen grad	I høj grad	Slet ikke	Slet ikke	I høj grad	I meget høj grad	I høj grad	I høj grad	I høj grad	Middel	Gode	Middel	Middel	Middel	Nej	Dyrker motionsidræt, løber eller lignende mindst 4 timer om ugen	God	Ja	Jeg klarer mig godt	I nogen grad	Nej	Ja - Omsorg, sundhed og pædagogik		Social og Sunhedskolen	0	0	0	1	0				30-40 minutter	16
Mand	18	0	0	0	0	1	0	0		I høj grad	I mindre grad	I nogen grad	I nogen grad	Slet ikke	Slet ikke	Ved ikke	Slet ikke	I høj grad	I nogen grad	Slet ikke	I høj grad	I høj grad	Ved ikke	Ved ikke	Ved ikke	Ved ikke	Ved ikke	Nej	Læser, ser fjernsyn eller har anden stillesiddende beskæftigelse	God	Ja	Jeg klarer mig godt	I nogen grad	Ja en gang imellem til fester	Ja - Teknologi, byggeri og transport.		EUC nord	0	0	0	1	0				0-10 minutter	18
Kvinde	12	0	0	1	0	0	0	0		I meget høj grad	I meget høj grad	I meget høj grad	I meget høj grad	I meget høj grad	I meget høj grad	I meget høj grad	I meget høj grad	I meget høj grad	I meget høj grad	I meget høj grad	I meget høj grad	I meget høj grad	Meget gode	Meget gode	Meget gode	Meget gode	Meget gode	Nej	Spadserer, cykler eller har anden lettere motion mindst 4 timer om ugen (medregn også cykling/gang til skole)	Nogenlunde	Ved ikke	Jeg klarer mig ikke så godt	I høj grad	Nej	Ja - Kontor, handel og forretningsservice		isral	0	0	0	1	0				0-10 minutter
Mand	17	20	0	0	0	1	0	0		Ved ikke	I høj grad	I nogen grad	I nogen grad	Ved ikke	I nogen grad	Slet ikke	I mindre grad	I nogen grad	I nogen grad	Ved ikke	I høj grad	I mindre grad	Gode	Gode	Gode	Ved ikke	Ved ikke	Måske	Spadserer, cykler eller har anden lettere motion mindst 4 timer om ugen (medregn også cykling/gang til skole)	God	Ved ikke	Jeg klarer mig godt	I høj grad	Ja, mere en 11 cigaretter om dagen	Ja - Teknologi, byggeri og transport.		Aarhus Tech	0	0	0	1	0				15-25 minutter	17
Mand	16	over 60	0	1	1	0	1	0		I høj grad	I meget høj grad	I meget høj grad	I meget høj grad	Slet ikke	I høj grad	Slet ikke	Slet ikke	I meget høj grad	I høj grad	I høj grad	I mindre grad	Slet ikke	Gode	Meget dårlige	Dårlige	Meget dårlige	Meget dårlige	Nej	Træner hårdt og dyrker konkurrenceidræt regelmæssigt og flere gange om ugen	Virkelig god	Ja	Jeg klarer mig meget godt	I høj grad	Nej	Ja - Teknologi, byggeri og transport.		Aarhus Tech	0	0	0	1	0				45 - over 60 min	16
Kvinde	17	10	1	0	0	1	1	0		I høj grad	I nogen grad	I nogen grad	I høj grad	I høj grad	I høj grad	I mindre grad	I mindre grad	I høj grad	I høj grad	I høj grad	I meget høj grad	I nogen grad	Dårlige	Middel	Dårlige	Dårlige	Meget dårlige	Måske	Spadserer, cykler eller har anden lettere motion mindst 4 timer om ugen (medregn også cykling/gang til skole)	Nogenlunde	Ja	Jeg klarer mig meget godt	I mindre grad	Nej	Ja - Teknologi, byggeri og transport.		Aarhus tech	0	0	0	1	0				0-10 minutter	17
Kvinde	16	20	0	0	1	0	0	0		I nogen grad	Slet ikke	Slet ikke	I nogen grad	Slet ikke	I meget høj grad	I mindre grad	Slet ikke	Slet ikke	I meget høj grad	I meget høj grad	I meget høj grad	I meget høj grad	Meget gode	Dårlige	Gode	Meget dårlige	Middel	Ja	Læser, ser fjernsyn eller har anden stillesiddende beskæftigelse	Dårlig	Ja	Jeg klarer mig meget godt	I meget høj grad	Ja, mere en 11 cigaretter om dagen	Ja - Fødevarer, jordbrug og oplevelser		Århus tech	0	0	0	1	0				15-25 minutter	16
Mand	18	0	0	0	0	0	0	1	Idræts dag	I høj grad	I nogen grad	I nogen grad	I nogen grad	I mindre grad	I mindre grad	I mindre grad	Slet ikke	I nogen grad	I nogen grad	I nogen grad	I nogen grad	I nogen grad	Gode	Gode	Gode	Ved ikke	Ved ikke	Nej	Spadserer, cykler eller har anden lettere motion mindst 4 timer om ugen (medregn også cykling/gang til skole)	God	Ved ikke	Jeg klarer mig godt	I nogen grad	Nej	Ja - Teknologi, byggeri og transport.		Aarhus tech	0	0	0	1	0				0-10 minutter	18
Mand	16	over 60	0	0	0	1	0	0		I nogen grad	I nogen grad	I nogen grad	I høj grad	I nogen grad	I høj grad	I nogen grad	I nogen grad	I høj grad	I nogen grad	I nogen grad	I nogen grad	I nogen grad	Middel	Middel	Middel	Middel	Middel	Nej	Læser, ser fjernsyn eller har anden stillesiddende beskæftigelse	Nogenlunde	Ved ikke	Jeg klarer mig godt	I høj grad	Nej	Ja - Teknologi, byggeri og transport.		Aarhus tech	0	0	0	1	0				45 - over 60 min	16
Mand	18	30	0	0	1	0	0	0		Slet ikke	Slet ikke	I nogen grad	Slet ikke	Slet ikke	I nogen grad	Slet ikke	Slet ikke	Slet ikke	I mindre grad	Slet ikke	Slet ikke	Slet ikke	Middel	Meget dårlige	Middel	Middel	Middel	Nej	Spadserer, cykler eller har anden lettere motion mindst 4 timer om ugen (medregn også cykling/gang til skole)	Nogenlunde	Nej	Jeg klarer mig middelt	I nogen grad	Ja en gang imellem til fester	Ja - Teknologi, byggeri og transport.		campus bornholm	0	0	0	1	0				30-40 minutter	18
Mand	16	15	0	0	0	1	1	0		I nogen grad	I nogen grad	I høj grad	I nogen grad	I nogen grad	I høj grad	I mindre grad	I mindre grad	I nogen grad	I høj grad	I nogen grad	I meget høj grad	I nogen grad	Middel	Middel	Gode	Meget gode	Middel											0	0	1	0	0				15-25 minutter	16
Mand	16	30	0	0	1	0	0	0		I høj grad	I nogen grad	I høj grad	I høj grad	I nogen grad	I nogen grad	Slet ikke	Slet ikke	I høj grad	I nogen grad	I høj grad	I høj grad	I nogen grad	Middel	Middel	Middel	Gode	Middel	Nej	Træner hårdt og dyrker konkurrenceidræt regelmæssigt og flere gange om ugen	God	Ja	Jeg klarer mig godt	I nogen grad	Ja en gang imellem til fester	Ja - Teknologi, byggeri og transport.		Cambus Bornholm	0	0	0	1	0				30-40 minutter	16
Mand	16	30	1	0	0	0	1	0		I meget høj grad	I meget høj grad	I meget høj grad	I meget høj grad	I meget høj grad	I meget høj grad	Slet ikke	Slet ikke	I meget høj grad	I meget høj grad	I meget høj grad	I meget høj grad	I meget høj grad	Middel	Middel	Middel	Middel	Middel	Nej	Spadserer, cykler eller har anden lettere motion mindst 4 timer om ugen (medregn også cykling/gang til skole)	Nogenlunde	Ja	Jeg klarer mig godt	I meget høj grad	Nej	Ja - Teknologi, byggeri og transport.		Aarhus Tech	0	0	0	1	0				30-40 minutter	16
Kvinde	18	15	0	0	1	0	0	0		I mindre grad	I mindre grad	Slet ikke	I nogen grad	Slet ikke	I nogen grad	I mindre grad	Slet ikke	I nogen grad	I nogen grad	I nogen grad	I mindre grad	I meget høj grad	Middel	Middel	Middel	Meget dårlige	Middel	Nej	Spadserer, cykler eller har anden lettere motion mindst 4 timer om ugen (medregn også cykling/gang til skole)									0	0	1	0	0				15-25 minutter	18
Kvinde	17	20	0	1	0	0	0	0		I meget høj grad	I meget høj grad	I meget høj grad	I meget høj grad	I høj grad	I nogen grad	Slet ikke	I meget høj grad	I meget høj grad	I mindre grad	I meget høj grad	I meget høj grad	I høj grad	Meget gode	Meget gode	Meget gode	Meget gode	Ved ikke	Nej	Spadserer, cykler eller har anden lettere motion mindst 4 timer om ugen (medregn også cykling/gang til skole)	God	Ja	Jeg klarer mig godt	I meget høj grad	ja, 6-10 cigaretter om dagen	Ja - Omsorg, sundhed og pædagogik		sosu esbjerg	0	0	0	1	0				15-25 minutter	17
Mand	16	over 60	0	0	0	0	0	1	gå mellem depot og projekter	Slet ikke	Ved ikke	Slet ikke	Ved ikke	Ved ikke	I meget høj grad	Slet ikke	I mindre grad	Ved ikke	Slet ikke	Slet ikke	I nogen grad	I høj grad	Meget gode	Middel	Gode	Meget dårlige	Ved ikke	Nej	Spadserer, cykler eller har anden lettere motion mindst 4 timer om ugen (medregn også cykling/gang til skole)	Nogenlunde	Ved ikke	Jeg klarer mig meget godt	I høj grad	Nej	Ja - Teknologi, byggeri og transport.		århus tech	0	0	0	1	0				45 - over 60 min	16
Kvinde	17	20	0	0	1	0	0	0		Slet ikke	Slet ikke	I mindre grad	I høj grad	I mindre grad	I mindre grad	I høj grad	I nogen grad	Slet ikke	I høj grad	I meget høj grad	I høj grad	Slet ikke	Middel	Dårlige	Dårlige	Dårlige	Dårlige	Nej	Læser, ser fjernsyn eller har anden stillesiddende beskæftigelse	Nogenlunde	Nej	Jeg klarer mig meget godt	I mindre grad	Nej	Ja - Omsorg, sundhed og pædagogik		kolding	0	0	0	1	0				15-25 minutter	17
Mand	17	30	0	0	0	1	1	0		I nogen grad	I mindre grad	I mindre grad	Ved ikke	Slet ikke	I høj grad	Slet ikke	I mindre grad	I høj grad	I mindre grad	I mindre grad	I mindre grad	I mindre grad	Gode	Gode	Gode	Ved ikke	Gode	Måske	Spadserer, cykler eller har anden lettere motion mindst 4 timer om ugen (medregn også cykling/gang til skole)	Nogenlunde	Ja	Jeg klarer mig ikke så godt	I nogen grad	ja, 1-5 cigaretter om dagen	Ja - Teknologi, byggeri og transport.		EUC	0	0	0	1	0				30-40 minutter	17
Mand	17	30	1	0	0	1	0	0		I meget høj grad	I meget høj grad	I nogen grad	I meget høj grad	I meget høj grad	I meget høj grad	Ved ikke	Ved ikke	I meget høj grad	I meget høj grad	I meget høj grad	I meget høj grad	I meget høj grad	Meget gode	Meget gode	Meget gode	Meget gode	Ved ikke	Ja	Spadserer, cykler eller har anden lettere motion mindst 4 timer om ugen (medregn også cykling/gang til skole)	God	Ved ikke	Jeg klarer mig ikke så godt	I meget høj grad	Nej	Ja - Teknologi, byggeri og transport.		Aarhus tech	0	0	0	1	0				30-40 minutter	17
Mand	17	45	0	0	1	0	1	0		I høj grad	I mindre grad	I nogen grad	I nogen grad	I nogen grad	I meget høj grad	I mindre grad	I mindre grad	I nogen grad	I nogen grad	I høj grad	I meget høj grad	I nogen grad	Middel	Dårlige	Middel	Meget dårlige	Ved ikke	Ved ikke	Dyrker motionsidræt, løber eller lignende mindst 4 timer om ugen	God	Ja	Jeg klarer mig meget godt	I høj grad	Nej	Ja - Teknologi, byggeri og transport.		Tech	0	0	0	1	0				45 - over 60 min	17
Mand	17	5	0	0	1	0	0	0		I nogen grad	I nogen grad	I mindre grad	I høj grad	I mindre grad	I høj grad	I mindre grad	I mindre grad	I nogen grad	I mindre grad	I høj grad	I mindre grad	I nogen grad	Middel	Meget dårlige	Dårlige	Meget dårlige	Dårlige	Nej	Dyrker motionsidræt, løber eller lignende mindst 4 timer om ugen	Mindre god	Ja	Jeg klarer mig middelt	I høj grad	Nej	Ja - Teknologi, byggeri og transport.		Aarhus tech hasselager alle	0	0	0	1	0				0-10 minutter	17
Kvinde	17	5	0	0	1	0	0	0		I høj grad	I nogen grad	I nogen grad	I høj grad	Slet ikke	I mindre grad	Slet ikke	I høj grad	I høj grad	I nogen grad	I høj grad	I meget høj grad	I mindre grad	Middel	Gode	Middel	Middel	Meget dårlige	Måske	Spadserer, cykler eller har anden lettere motion mindst 4 timer om ugen (medregn også cykling/gang til skole)	Nogenlunde	Ja	Jeg klarer mig middelt	I nogen grad	Nej	Ja - Omsorg, sundhed og pædagogik		SOSU Horsens	0	0	0	1	0				0-10 minutter	17
Mand	17	30	0	0	1	0	0	0		I høj grad	I mindre grad	I mindre grad	I nogen grad	Slet ikke	I mindre grad	I nogen grad	I nogen grad	I mindre grad	I nogen grad	I meget høj grad	I meget høj grad	Slet ikke	Gode	Gode	Middel	Gode	Gode	Nej	Læser, ser fjernsyn eller har anden stillesiddende beskæftigelse	Nogenlunde	Ja	Jeg klarer mig godt	I nogen grad	Nej	Ja - Teknologi, byggeri og transport.		campus bornholm	0	0	0	1	0				30-40 minutter	17
Mand	18	20	0	0	0	0	1	0		I meget høj grad	I meget høj grad	I meget høj grad	I meget høj grad	I meget høj grad	I meget høj grad	Slet ikke	Slet ikke	I meget høj grad																				0	0	1	0	0				15-25 minutter	18
Mand	18	over 60	0	0	0	0	1	1	Det fysiske arbejde	I meget høj grad	I høj grad	I meget høj grad	I meget høj grad	Slet ikke	I mindre grad	I mindre grad	I høj grad	I meget høj grad																				0	0	1	0	0				45 - over 60 min	18
			0	0	0	0	0	0																														0	1	0	0	0
Kvinde	17	10	0	0	1	0	0	0		I høj grad	I meget høj grad	I meget høj grad	I høj grad	I høj grad	I nogen grad	Slet ikke	Slet ikke	I meget høj grad	I nogen grad	I høj grad	I høj grad	I nogen grad	Gode	Middel	Gode	Gode	Middel	Nej	Dyrker motionsidræt, løber eller lignende mindst 4 timer om ugen	Nogenlunde	Ja	Jeg klarer mig meget godt	I høj grad	Nej	Ja - Omsorg, sundhed og pædagogik		SOSU Horsens	0	0	0	1	0				0-10 minutter	17
Kvinde	18	55	0	0	1	0	0	0																														0	0	1	0	0				45 - over 60 min	18
Kvinde	18	30	0	0	1	1	0	0		I høj grad	I høj grad	I nogen grad	I nogen grad	I nogen grad	I meget høj grad	Slet ikke	Slet ikke	I høj grad	I høj grad	I meget høj grad	I meget høj grad	I mindre grad	Middel	Gode	Middel	Dårlige	Meget dårlige	Måske	Dyrker motionsidræt, løber eller lignende mindst 4 timer om ugen	Nogenlunde	Ja	Jeg klarer mig middelt	I nogen grad	Nej	Ja - Omsorg, sundhed og pædagogik		Horsens	0	0	0	1	0				30-40 minutter	18
Kvinde	18	10	0	0	1	0	1	0		I meget høj grad	I meget høj grad	I meget høj grad	I meget høj grad	I nogen grad	I meget høj grad	Slet ikke	Slet ikke	I meget høj grad	I høj grad	I høj grad	I meget høj grad	I nogen grad	Dårlige	Meget gode	Middel	Meget gode	Middel	Nej	Dyrker motionsidræt, løber eller lignende mindst 4 timer om ugen	Nogenlunde	Ja	Jeg klarer mig middelt	I nogen grad	Ja en gang imellem til fester	Ja - Omsorg, sundhed og pædagogik		sosu horsnes	0	0	0	1	0				0-10 minutter	18
			0	0	0	0	0	0																														0	1	0	0	0
Mand	18	over 60	0	0	0	0	0	1	Værksted	Ved ikke	I nogen grad	Slet ikke	Ved ikke	Slet ikke	Ved ikke	Ved ikke	Ved ikke	Slet ikke	Slet ikke	Slet ikke	Slet ikke	Slet ikke	Ved ikke	Ved ikke	Gode	Ved ikke	Ved ikke	Ved ikke	Læser, ser fjernsyn eller har anden stillesiddende beskæftigelse	Dårlig	Nej	Jeg klarer mig middelt	I høj grad	Nej	Ja - Teknologi, byggeri og transport.		CELF Nykøbing f	0	0	0	1	0				45 - over 60 min	18
Mand	17	25	0	0	0	1	0	0		I mindre grad	Ved ikke	I mindre grad	I høj grad	Slet ikke	Slet ikke	I nogen grad	I høj grad	I nogen grad	I mindre grad	I nogen grad	I høj grad	I høj grad	Gode	Meget gode	Gode	Ved ikke	Middel	Ved ikke	Læser, ser fjernsyn eller har anden stillesiddende beskæftigelse	Nogenlunde	Nej	Jeg klarer mig godt	I høj grad	ja, 1-5 cigaretter om dagen	Ja - Teknologi, byggeri og transport.		CELF	0	0	0	1	0				15-25 minutter	17
Mand	17	40	1	0	1	0	0	0		I nogen grad	I nogen grad	I nogen grad	I meget høj grad	I mindre grad	I nogen grad	I mindre grad	Ved ikke	I meget høj grad	I høj grad	I meget høj grad	I høj grad	I nogen grad	Meget gode	Gode	Gode	Ved ikke	Dårlige	Nej	Læser, ser fjernsyn eller har anden stillesiddende beskæftigelse	Dårlig	Ja	Jeg klarer mig godt	I meget høj grad	Nej	Ja - Fødevarer, jordbrug og oplevelser		Aalborg tech	0	0	0	1	0				30-40 minutter	17
			0	0	0	0	0	0																														0	1	0	0	0
Mand	18	25	0	0	1	0	0	0		I meget høj grad	I meget høj grad	I meget høj grad	I meget høj grad	Ved ikke	I meget høj grad	Slet ikke	Slet ikke	I meget høj grad	I meget høj grad	I meget høj grad	I meget høj grad	I meget høj grad	Ved ikke	Meget gode	Meget gode	Meget gode	Ved ikke	Nej	Spadserer, cykler eller har anden lettere motion mindst 4 timer om ugen (medregn også cykling/gang til skole)	Dårlig	Ja	Jeg klarer mig middelt	Ved ikke	Nej	Ja - Teknologi, byggeri og transport.		Bornholms erhvervskole rønne.	0	0	0	1	0				15-25 minutter	18
Kvinde	17	30	0	0	0	0	0	0																														0	0	1	0	0				30-40 minutter	17
Kvinde	17	5	0	1	0	1	0	0		I nogen grad	I nogen grad	I mindre grad	I nogen grad	Slet ikke	I mindre grad	I mindre grad	I mindre grad	I nogen grad	I nogen grad	I nogen grad	I nogen grad	I høj grad	Middel	Gode	Gode	Ved ikke	Meget gode	Måske	Spadserer, cykler eller har anden lettere motion mindst 4 timer om ugen (medregn også cykling/gang til skole)	Nogenlunde	Ja	Jeg klarer mig godt	I høj grad	Nej	Ja - Teknologi, byggeri og transport.		celf nykøbing f.	0	0	0	1	0				0-10 minutter	17
Mand	16	0	0	1	0	0	0	0		I nogen grad	I høj grad	I høj grad	I mindre grad	I høj grad	I høj grad	I nogen grad	I nogen grad	I høj grad	I nogen grad	I meget høj grad	I høj grad	I mindre grad	Middel	Middel	Gode	Ved ikke	Meget gode	Ved ikke	Dyrker motionsidræt, løber eller lignende mindst 4 timer om ugen	God	Ved ikke	Jeg klarer mig godt	I nogen grad	Nej	Ja - Teknologi, byggeri og transport.		Nykøbing	0	0	0	1	0				0-10 minutter	16
Mand	18	over 60	0	0	0	0	0	1	værksted	I mindre grad	Slet ikke	I nogen grad	I nogen grad	Slet ikke	I mindre grad	I mindre grad	I nogen grad	Slet ikke	I høj grad	I høj grad	I høj grad	I høj grad	Middel	Gode	Gode	Meget dårlige	Middel	Ja	Læser, ser fjernsyn eller har anden stillesiddende beskæftigelse	Nogenlunde	Ja	Jeg klarer mig middelt	I meget høj grad	Nej	Ja - Teknologi, byggeri og transport.		celf nykøbing f	0	0	0	1	0				45 - over 60 min	18
			0	0	0	0	0	0																														0	1	0	0	0
Kvinde	17	30	0	0	0	0	0	1	Gårdbutik temaet	Slet ikke	Slet ikke	Slet ikke	I nogen grad	I mindre grad	I mindre grad	I mindre grad	I mindre grad	I nogen grad	I mindre grad	I nogen grad	I nogen grad	I mindre grad	Ved ikke	Ved ikke	Ved ikke	Ved ikke	Ved ikke	Ved ikke	Spadserer, cykler eller har anden lettere motion mindst 4 timer om ugen (medregn også cykling/gang til skole)	Nogenlunde	Nej	Jeg klarer mig middelt	Slet ikke	Nej	Ja - Fødevarer, jordbrug og oplevelser		CELF Nykøbing Falster	0	0	0	1	0				30-40 minutter	17
			0	0	0	0	0	0																														0	1	0	0	0
Mand	16	10	0	1	0	1	1	0		I høj grad	I nogen grad	I nogen grad	I høj grad	Slet ikke	Slet ikke	I nogen grad	I nogen grad	I nogen grad	Slet ikke	I mindre grad	Ved ikke	I mindre grad	Ved ikke	Ved ikke	Ved ikke	Ved ikke	Ved ikke	Måske	Træner hårdt og dyrker konkurrenceidræt regelmæssigt og flere gange om ugen	Nogenlunde	Ved ikke	Jeg klarer mig godt	I høj grad	Ja, mere en 11 cigaretter om dagen	Ja - Teknologi, byggeri og transport.		Celf nykøbing f.	0	0	0	1	0				0-10 minutter	16
Mand	17	5	0	0	1	1	0	0		I meget høj grad	I høj grad	I meget høj grad	I meget høj grad	I meget høj grad	I meget høj grad	Ved ikke	Ved ikke	I meget høj grad	I meget høj grad	I meget høj grad	I meget høj grad	Ved ikke	Middel	Middel	Meget gode	Middel	Meget gode	Nej	Dyrker motionsidræt, løber eller lignende mindst 4 timer om ugen	God	Ja	Jeg klarer mig godt	I nogen grad	Ja en gang imellem til fester	Ja - Omsorg, sundhed og pædagogik		Sosu horsens	0	0	0	1	0				0-10 minutter	17
Mand	18	30	0	0	1	0	0	0		I meget høj grad	I nogen grad	I høj grad	I høj grad	I høj grad	I høj grad	Slet ikke	I nogen grad	I nogen grad	I høj grad	I høj grad	I meget høj grad	I nogen grad	Middel	Dårlige	Dårlige	Middel	Gode	Nej	Spadserer, cykler eller har anden lettere motion mindst 4 timer om ugen (medregn også cykling/gang til skole)	Nogenlunde	Ja	Jeg klarer mig middelt	I mindre grad	Nej	Ja - Teknologi, byggeri og transport.		Campus Bornholm	0	0	0	1	0				30-40 minutter	18
Mand	17	0	0	1	0	0	0	0		I nogen grad	Ved ikke	Ved ikke	Ved ikke	Ved ikke	Ved ikke	I meget høj grad	Ved ikke	I meget høj grad	Ved ikke	Ved ikke	I meget høj grad	Ved ikke	Meget gode	Gode	Ved ikke	Ved ikke	Middel	Ja	Træner hårdt og dyrker konkurrenceidræt regelmæssigt og flere gange om ugen	God	Ja	Jeg klarer mig middelt	I høj grad	Nej	Ja - Teknologi, byggeri og transport.		Celf	0	0	0	1	0				0-10 minutter	17
Mand	17	10	0	0	0	1	0	0		I høj grad	I nogen grad	I nogen grad	I høj grad	I nogen grad	I mindre grad	I mindre grad	I nogen grad	I nogen grad	I mindre grad	I nogen grad	I mindre grad	I mindre grad	Middel	Middel	Gode	Middel	Middel	Måske	Dyrker motionsidræt, løber eller lignende mindst 4 timer om ugen	God	Nej	Jeg klarer mig middelt	I nogen grad	Ja, mere en 11 cigaretter om dagen	Ja - Teknologi, byggeri og transport.		EUC-NORD frederikshavn	0	0	0	1	0				0-10 minutter	17
Kvinde	18	30	0	1	0	0	1	0		I nogen grad	I nogen grad	I nogen grad	Slet ikke	Slet ikke	I mindre grad	I høj grad	I meget høj grad	I mindre grad																				0	0	1	0	0				30-40 minutter	18
			0	0	0	0	0	0																														0	1	0	0	0
Kvinde	16	25	0	1	1	0	0	0		I meget høj grad	I meget høj grad	I meget høj grad	I meget høj grad	I meget høj grad	I meget høj grad	I mindre grad	I mindre grad	I meget høj grad	I høj grad	I høj grad	I høj grad	I nogen grad	Gode	Dårlige	Gode	Gode	Middel	Nej	Dyrker motionsidræt, løber eller lignende mindst 4 timer om ugen	Nogenlunde	Ja	Jeg klarer mig godt	I høj grad	Nej	Ja - Omsorg, sundhed og pædagogik		SOSU Kolding	0	0	0	1	0				15-25 minutter	16
Mand	17	0	1	0	1	1	1	0		I meget høj grad	I høj grad	I meget høj grad	I meget høj grad	Slet ikke	I meget høj grad	Slet ikke	Slet ikke	I meget høj grad	I meget høj grad	I meget høj grad	I meget høj grad	I nogen grad	Middel	Meget gode	Ved ikke	Gode	Ved ikke	Nej	Læser, ser fjernsyn eller har anden stillesiddende beskæftigelse	Dårlig	Ja	Jeg klarer mig middelt	I høj grad	Ja en gang imellem til fester	Ja - Teknologi, byggeri og transport.		campus bornholm	0	0	0	1	0				0-10 minutter	17
Mand	17	5	0	0	0	1	0	0		I høj grad	I høj grad	I nogen grad	I nogen grad	I nogen grad	I nogen grad	I nogen grad	I nogen grad	I nogen grad	I høj grad	I høj grad	I høj grad	I nogen grad	Gode	Gode	Gode	Ved ikke	Ved ikke	Måske	Træner hårdt og dyrker konkurrenceidræt regelmæssigt og flere gange om ugen	Nogenlunde	Nej	Jeg klarer mig godt	I høj grad	Ja en gang imellem til fester	Ja - Teknologi, byggeri og transport.		EUC nord frederikshavn	0	0	0	1	0				0-10 minutter	17
Mand	16	25	1	0	1	1	1	0		I nogen grad	I nogen grad	I nogen grad	I nogen grad	I nogen grad	I nogen grad	I høj grad	I nogen grad	I nogen grad	I nogen grad	I nogen grad	I nogen grad	I nogen grad	Middel	Middel	Middel	Middel	Middel	Måske	Dyrker motionsidræt, løber eller lignende mindst 4 timer om ugen	Nogenlunde	Ved ikke	Ved ikke	Ved ikke	Nej	Ja - Teknologi, byggeri og transport.		eucnv	0	0	0	1	0				15-25 minutter	16
Mand	16	10	0	0	1	0	0	0		I høj grad	I høj grad	I meget høj grad	I meget høj grad	I nogen grad	I høj grad	Slet ikke	Slet ikke	I meget høj grad	I meget høj grad	I meget høj grad	I høj grad	I høj grad	Gode	Meget gode	Gode	Middel	Middel	Nej	Træner hårdt og dyrker konkurrenceidræt regelmæssigt og flere gange om ugen	God	Ja	Jeg klarer mig godt	I høj grad	Ja, mere en 11 cigaretter om dagen	Ja - Teknologi, byggeri og transport.		Campus Bornholm EUD	0	0	0	1	0				0-10 minutter	16
Kvinde	18	10	0	0	1	0	0	0		Slet ikke	Slet ikke	Slet ikke	Slet ikke	Slet ikke	I nogen grad	I høj grad	Ved ikke	Ved ikke	Ved ikke	Ved ikke	I nogen grad	Ved ikke	Gode	Ved ikke	Ved ikke	Ved ikke	Ved ikke	Ja	Spadserer, cykler eller har anden lettere motion mindst 4 timer om ugen (medregn også cykling/gang til skole)	Nogenlunde	Nej	Jeg klarer mig godt	I nogen grad	Nej	Ja - Omsorg, sundhed og pædagogik		Sosu Fyn, afdeling syd	0	0	0	1	0				0-10 minutter	18
Mand	16	40	0	0	0	0	1	0		I meget høj grad	I meget høj grad	I meget høj grad	I høj grad	I høj grad	I meget høj grad	Slet ikke	Slet ikke	I høj grad	I meget høj grad	I meget høj grad	I meget høj grad	I høj grad	Meget dårlige	Meget dårlige	Dårlige	Meget dårlige	Meget dårlige	Nej	Dyrker motionsidræt, løber eller lignende mindst 4 timer om ugen	Virkelig god	Ja	Jeg klarer mig middelt	I nogen grad					0	0	1	0	0				30-40 minutter	16
Mand	17	5	0	0	0	1	0	0		I høj grad	I høj grad	I høj grad	I nogen grad	I nogen grad	I nogen grad	I høj grad	I nogen grad	I nogen grad	I nogen grad	I nogen grad	I nogen grad	I nogen grad	Gode	Gode	Gode	Gode	Gode	Ja	Træner hårdt og dyrker konkurrenceidræt regelmæssigt og flere gange om ugen	God	Nej	Jeg klarer mig godt	I nogen grad	Ja en gang imellem til fester	Ja - Teknologi, byggeri og transport.		Euc Nord Frederikshavn	0	0	0	1	0				0-10 minutter	17
Kvinde	17	50	1	0	0	1	1	0		I høj grad	I nogen grad	I høj grad	I høj grad	I nogen grad	I nogen grad	Slet ikke	I mindre grad	I høj grad	I mindre grad	I nogen grad	I nogen grad	I nogen grad	Middel	Gode	Gode	Middel	Ved ikke	Nej	Træner hårdt og dyrker konkurrenceidræt regelmæssigt og flere gange om ugen	God	Ja	Jeg klarer mig middelt	I nogen grad	ja, 1-5 cigaretter om dagen	Ja - Teknologi, byggeri og transport.		EUC SYD sønderborg	0	0	0	1	0				45 - over 60 min	17
Mand	17	over 60	0	0	0	0	0	1	Motionsdag og bevægelse på arbejdsdag	I høj grad	I meget høj grad	I høj grad	I meget høj grad	I nogen grad	I meget høj grad	Slet ikke	Ved ikke	I meget høj grad	Slet ikke	I høj grad	I meget høj grad	I nogen grad	Gode	Dårlige	Dårlige	Meget dårlige	Meget dårlige	Måske	Dyrker motionsidræt, løber eller lignende mindst 4 timer om ugen	God	Nej	Jeg klarer mig godt	I meget høj grad	Nej	Ja - Teknologi, byggeri og transport.		Århus tech	0	0	0	1	0				45 - over 60 min	17
Kvinde	16	15	0	1	0	0	1	0		I meget høj grad	I meget høj grad	I nogen grad	I meget høj grad	I meget høj grad	I meget høj grad	I mindre grad	I nogen grad	I nogen grad	I høj grad	I nogen grad	I høj grad	I høj grad	Gode	Gode	Middel	Gode	Middel	Nej	Spadserer, cykler eller har anden lettere motion mindst 4 timer om ugen (medregn også cykling/gang til skole)	Nogenlunde	Ja	Jeg klarer mig godt	I høj grad	Ja en gang imellem til fester	Ja - Omsorg, sundhed og pædagogik		Social & sundhedsskolen Fyn	0	0	0	1	0				15-25 minutter	16
Mand	17	30	0	0	0	1	1	0		I nogen grad	I mindre grad	I mindre grad	I mindre grad	I høj grad	I meget høj grad	I høj grad	I nogen grad	I nogen grad	I mindre grad	I nogen grad	I nogen grad	I mindre grad	Middel	Ved ikke	Middel	Ved ikke	Ved ikke	Ja	Læser, ser fjernsyn eller har anden stillesiddende beskæftigelse	Mindre god	Ved ikke	Jeg klarer mig middelt	I høj grad	Nej	Ja - Teknologi, byggeri og transport.		Celf nyk f	0	0	0	1	0				30-40 minutter	17
Mand	17	over 60	0	0	0	1	0	1	Værksted	I nogen grad	I høj grad	I mindre grad	I nogen grad	I nogen grad	I mindre grad	I nogen grad	I høj grad	I nogen grad	I nogen grad	I høj grad	I nogen grad	Slet ikke	Gode	Middel	Middel	Meget dårlige	Meget dårlige	Måske	Læser, ser fjernsyn eller har anden stillesiddende beskæftigelse	Nogenlunde	Nej	Jeg klarer mig godt	I høj grad	ja, 6-10 cigaretter om dagen	Ja - Teknologi, byggeri og transport.		Celf Nykøbing	0	0	0	1	0				45 - over 60 min	17
Mand	18	15	0	0	0	1	0	0		I meget høj grad	Ved ikke	I meget høj grad	I meget høj grad	Ved ikke	I meget høj grad	I meget høj grad	I meget høj grad	Ved ikke	I meget høj grad	I meget høj grad	I meget høj grad	I meget høj grad	Meget gode	Meget gode	Meget gode	Meget gode	Meget gode	Ja	Dyrker motionsidræt, løber eller lignende mindst 4 timer om ugen	Virkelig god	Nej	Jeg klarer mig meget godt	I meget høj grad	Ja, mere en 11 cigaretter om dagen	Ja - Teknologi, byggeri og transport.		Celf Nykøbing F	0	0	0	1	0				15-25 minutter	18
			0	0	0	0	0	0																														0	1	0	0	0
Kvinde	18	30	0	1	0	0	0	0																														0	0	1	0	0				30-40 minutter	18
			0	0	0	0	0	0																														0	1	0	0	0
Mand	18	20	0	0	1	0	0	0		I nogen grad	I nogen grad	I nogen grad	I nogen grad	Ved ikke	I nogen grad	Ved ikke	Ved ikke	I nogen grad	Ved ikke	I nogen grad	I nogen grad	Ved ikke	Middel	Ved ikke	Middel	Ved ikke	Ved ikke	Ved ikke	Spadserer, cykler eller har anden lettere motion mindst 4 timer om ugen (medregn også cykling/gang til skole)	God	Ja	Jeg klarer mig godt	I nogen grad	Nej	Ja - Teknologi, byggeri og transport.		Campus Bornholm	0	0	0	1	0				15-25 minutter	18
Kvinde	16	40	1	0	1	0	1	0		I høj grad	I mindre grad	Ved ikke	I nogen grad	I mindre grad	I mindre grad	Slet ikke	I høj grad	I nogen grad	I meget høj grad	I meget høj grad	I meget høj grad	I meget høj grad	Meget gode	Gode	Dårlige	Gode	Meget gode	Nej	Spadserer, cykler eller har anden lettere motion mindst 4 timer om ugen (medregn også cykling/gang til skole)	Nogenlunde	Nej	Jeg klarer mig godt	I meget høj grad	ja, 1-5 cigaretter om dagen	Ja - Omsorg, sundhed og pædagogik		Sosu Horsens	0	0	0	1	0				30-40 minutter	16
Kvinde	17	15	0	0	1	0	0	0		I nogen grad	I nogen grad	I nogen grad	I nogen grad	I nogen grad	I nogen grad	I nogen grad	I nogen grad	I nogen grad	I nogen grad	I høj grad	I nogen grad	I høj grad	Middel	Middel	Middel	Middel	Dårlige	Nej	Spadserer, cykler eller har anden lettere motion mindst 4 timer om ugen (medregn også cykling/gang til skole)	Nogenlunde	Ja	Jeg klarer mig middelt	I nogen grad	Nej	Ja - Omsorg, sundhed og pædagogik		Vejle	0	0	0	1	0				15-25 minutter	17
			0	0	0	0	0	0																														0	1	0	0	0
Kvinde	18	15	1	1	1	0	1	0		I meget høj grad	I meget høj grad	I høj grad	I meget høj grad	I meget høj grad	I meget høj grad	Slet ikke	Slet ikke	I meget høj grad	I høj grad	I høj grad	I meget høj grad	I høj grad	Meget gode	Meget gode	Middel	Meget gode	Gode	Nej	Træner hårdt og dyrker konkurrenceidræt regelmæssigt og flere gange om ugen	Virkelig god	Ja	Jeg klarer mig godt	I meget høj grad	Nej	Ja - Omsorg, sundhed og pædagogik		SOSU Horsens	0	0	0	1	0				15-25 minutter	18
Mand	18	over 60	0	0	1	0	0	0		I høj grad	I meget høj grad	I meget høj grad	I høj grad	I meget høj grad	I meget høj grad	Slet ikke	I meget høj grad	I meget høj grad	I høj grad	I nogen grad	I høj grad	I meget høj grad	Gode	Gode	Gode	Meget gode	Gode	Nej	Dyrker motionsidræt, løber eller lignende mindst 4 timer om ugen	God	Ja	Jeg klarer mig godt	I høj grad	Nej	Ja - Omsorg, sundhed og pædagogik		Sosu Horsens	0	0	0	1	0				45 - over 60 min	18
Kvinde	18	30	1	1	1	0	0	0																														0	0	1	0	0				30-40 minutter	18
			0	0	0	0	0	0																														0	1	0	0	0
Mand	18	25	0	0	1	0	0	0		I høj grad	Ved ikke	Ved ikke	Ved ikke	Ved ikke	I høj grad	Ved ikke	Slet ikke	I høj grad	I meget høj grad	I meget høj grad	I meget høj grad	I meget høj grad	Dårlige	Dårlige	Dårlige	Dårlige	Dårlige	Ved ikke	Spadserer, cykler eller har anden lettere motion mindst 4 timer om ugen (medregn også cykling/gang til skole)	Nogenlunde	Ved ikke	Jeg klarer mig middelt	I nogen grad	Nej	Ja - Teknologi, byggeri og transport.		Campus bornholm	0	0	0	1	0				15-25 minutter	18
			0	0	0	0	0	0																														0	1	0	0	0
Mand	16	45	1	1	1	0	1	0										I meget høj grad																				0	0	1	0	0				45 - over 60 min	16
Kvinde	18	15	0	0	1	1	0	0		I meget høj grad	I nogen grad	I nogen grad	I mindre grad	I nogen grad	I nogen grad	Slet ikke	Slet ikke	I meget høj grad	I meget høj grad	I høj grad	I nogen grad	I høj grad	Gode	Gode	Gode	Gode	Ved ikke	Måske	Spadserer, cykler eller har anden lettere motion mindst 4 timer om ugen (medregn også cykling/gang til skole)	Nogenlunde	Ved ikke	Jeg klarer mig godt	I nogen grad	Nej	Nej - jeg ved ikke hvilket hovedområde, jeg er tilknyttet (skriv gerne hvad din uddannelse hedder)	ssa	kolding	0	0	0	1	0				15-25 minutter	18
Kvinde	16	20	0	0	1	1	0	0																														0	0	1	0	0				15-25 minutter	16
Kvinde	17	25	0	1	1	1	0	0		I høj grad	I høj grad	I høj grad	I høj grad	I mindre grad	I høj grad	Slet ikke	I høj grad	I høj grad	I høj grad	I høj grad	I høj grad	I nogen grad	Meget gode	Meget gode	Meget gode	Meget gode	Gode	Nej	Spadserer, cykler eller har anden lettere motion mindst 4 timer om ugen (medregn også cykling/gang til skole)	Nogenlunde	Ved ikke	Jeg klarer mig godt	I meget høj grad	Nej	Ja - Omsorg, sundhed og pædagogik		SOSO Aarhus	0	0	0	1	0				15-25 minutter	17
Mand	17	25	1	0	1	0	1	0		Ved ikke	Slet ikke	I nogen grad	I nogen grad	Slet ikke	I høj grad	I mindre grad	I mindre grad	Ved ikke	I nogen grad	I nogen grad	I meget høj grad	I meget høj grad	Meget dårlige	Meget gode	Dårlige	Gode	Ved ikke	Nej	Spadserer, cykler eller har anden lettere motion mindst 4 timer om ugen (medregn også cykling/gang til skole)	Nogenlunde	Nej	Jeg klarer mig godt	I høj grad	Nej	Ja - Teknologi, byggeri og transport.		Cambus Bornholm EUD	0	0	0	1	0				15-25 minutter	17
Kvinde	17	5	0	1	1	1	0	0		I meget høj grad	I meget høj grad	I meget høj grad	I meget høj grad	I meget høj grad	I meget høj grad	Slet ikke	Slet ikke	I meget høj grad	I meget høj grad	I meget høj grad	I meget høj grad	I meget høj grad	Meget gode	Meget gode	Meget gode	Meget gode	Gode	Nej	Læser, ser fjernsyn eller har anden stillesiddende beskæftigelse	Nogenlunde	Ja	Jeg klarer mig meget godt	I meget høj grad	Ja, mere en 11 cigaretter om dagen	Ja - Omsorg, sundhed og pædagogik		Sosu	0	0	0	1	0				0-10 minutter	17
Mand	17	10	0	0	1	1	0	0		I høj grad	I nogen grad	I høj grad	I meget høj grad	Slet ikke	I nogen grad	I mindre grad	I mindre grad	I meget høj grad	I meget høj grad	I nogen grad	I høj grad	I nogen grad	Gode	Meget dårlige	Dårlige	Meget dårlige	Meget dårlige	Nej	Spadserer, cykler eller har anden lettere motion mindst 4 timer om ugen (medregn også cykling/gang til skole)	Nogenlunde	Ja	Jeg klarer mig godt	I høj grad	Ja en gang imellem til fester	Ja - Teknologi, byggeri og transport.		Aarhus Tech	0	0	0	1	0				0-10 minutter	17
Kvinde	18	5	0	0	1	0	0	0		I meget høj grad	I meget høj grad	I høj grad	I meget høj grad	Slet ikke	I mindre grad	Slet ikke	I høj grad	I høj grad	I nogen grad	I meget høj grad	I meget høj grad	I mindre grad	Middel	Gode	Middel	Middel	Meget dårlige	Nej	Spadserer, cykler eller har anden lettere motion mindst 4 timer om ugen (medregn også cykling/gang til skole)	God	Ja	Jeg klarer mig ikke så godt	I nogen grad	Nej	Ja - Omsorg, sundhed og pædagogik		SOSU Horsens	0	0	0	1	0				0-10 minutter	18
Mand	17	10	0	0	1	1	0	0		Slet ikke	Slet ikke	Slet ikke	I mindre grad	Slet ikke	I nogen grad	I meget høj grad	I meget høj grad	I nogen grad	I nogen grad	I nogen grad	I høj grad	I høj grad	Dårlige	Gode	Middel	Middel	Dårlige	Måske	Læser, ser fjernsyn eller har anden stillesiddende beskæftigelse	Dårlig	Nej	Jeg klarer mig godt	I mindre grad	Ja, mere en 11 cigaretter om dagen	Ja - Teknologi, byggeri og transport.		Bornholms erhvervskole	0	0	0	1	0				0-10 minutter	17
Mand	16	10	1	0	0	0	0	0		I meget høj grad	I høj grad	I nogen grad	I høj grad	I meget høj grad	I meget høj grad	Slet ikke	I mindre grad	I meget høj grad	I høj grad	I høj grad	I høj grad	I høj grad	Middel	Middel	Middel	Dårlige	Dårlige	Måske	Spadserer, cykler eller har anden lettere motion mindst 4 timer om ugen (medregn også cykling/gang til skole)	Nogenlunde	Ja							0	0	1	0	0				0-10 minutter	16
Kvinde	17	15	1	0	1	0	0	1	morgen- og eftermiddagsaktivitet	I meget høj grad	I høj grad	I meget høj grad	I meget høj grad	I høj grad	I høj grad	I mindre grad	Slet ikke	I meget høj grad	I meget høj grad	I meget høj grad	I meget høj grad	I nogen grad	Meget gode	Meget gode	Meget gode	Middel	Gode	Måske	Dyrker motionsidræt, løber eller lignende mindst 4 timer om ugen	Nogenlunde	Ja	Jeg klarer mig middelt	I meget høj grad	Ja en gang imellem til fester	Ja - Omsorg, sundhed og pædagogik		SOSU Aarhus	0	0	0	1	0				15-25 minutter	17
Mand	17	25	0	0	1	0	0	0		I høj grad	I høj grad	I meget høj grad	I høj grad	I høj grad	I høj grad	I mindre grad	I mindre grad	I meget høj grad	I meget høj grad	I meget høj grad	I meget høj grad	I meget høj grad	Middel	Gode	Gode	Meget gode	Gode											0	0	1	0	0				15-25 minutter	17
Mand	19	45	0	0	1	0	0	0		I meget høj grad	I nogen grad	I høj grad	Ved ikke	Ved ikke	I høj grad	Slet ikke	Slet ikke	I høj grad	I høj grad	I høj grad	I meget høj grad	I nogen grad	Middel	Gode	Middel	Meget gode	Ved ikke	Nej	Læser, ser fjernsyn eller har anden stillesiddende beskæftigelse	Mindre god	Ja	Jeg klarer mig godt	I nogen grad	Nej	Ja - Teknologi, byggeri og transport.		Campus Bornholm	0	0	0	1	0				45 - over 60 min	19
Mand	16	15	0	0	1	0	0	0		I nogen grad	I mindre grad	Ved ikke	I høj grad	I mindre grad	I nogen grad	I mindre grad	I mindre grad	I nogen grad	I nogen grad	I nogen grad	I høj grad	I mindre grad	Middel	Ved ikke	Middel	Middel	Ved ikke	Ved ikke	Læser, ser fjernsyn eller har anden stillesiddende beskæftigelse	Nogenlunde	Nej	Jeg klarer mig godt	I nogen grad	Nej	Ja - Teknologi, byggeri og transport.		Campus Bornholm	0	0	0	1	0				15-25 minutter	16
Kvinde	18	20	0	0	1	0	0	0		Ved ikke	I nogen grad	Slet ikke	I meget høj grad	Slet ikke	I mindre grad	I mindre grad	Slet ikke	I nogen grad	I meget høj grad	I meget høj grad	I høj grad	I høj grad	Gode	Meget gode	Gode	Gode	Gode	Måske	Spadserer, cykler eller har anden lettere motion mindst 4 timer om ugen (medregn også cykling/gang til skole)	Nogenlunde	Nej	Jeg klarer mig godt	I høj grad	Nej	Ja - Omsorg, sundhed og pædagogik		Sosu aarhu	0	0	0	1	0				15-25 minutter	18
Mand	18	0	0	0	0	0	0	1	i timerne	I nogen grad	I nogen grad	I nogen grad	I høj grad	I nogen grad	I høj grad	I høj grad	I nogen grad	I mindre grad	I nogen grad	I nogen grad	I nogen grad	I høj grad	Middel	Middel	Gode	Ved ikke	Middel	Ved ikke	Spadserer, cykler eller har anden lettere motion mindst 4 timer om ugen (medregn også cykling/gang til skole)	Mindre god	Ja	Jeg klarer mig meget godt	I høj grad	Ja en gang imellem til fester	Ja - Teknologi, byggeri og transport.		EUC NORD Frederikshavn	0	0	0	1	0				0-10 minutter	18
Mand	12	0	0	0	0	0	1	0		I nogen grad	I høj grad	I meget høj grad	I meget høj grad	Slet ikke	I nogen grad	I mindre grad	I nogen grad	I meget høj grad	I høj grad	I nogen grad	I mindre grad	I mindre grad	Gode	Gode	Gode	Gode	Middel	Ja	Spadserer, cykler eller har anden lettere motion mindst 4 timer om ugen (medregn også cykling/gang til skole)	Nogenlunde	Nej	Ved ikke	Slet ikke	Nej	Nej - jeg ved ikke hvilket hovedområde, jeg er tilknyttet (skriv gerne hvad din uddannelse hedder)	Nix	Nix	0	0	0	1	0				0-10 minutter
Mand	16	0	1	0	1	0	1	0		I meget høj grad	I mindre grad	I nogen grad	I nogen grad	I mindre grad	I høj grad	I mindre grad	I mindre grad	I høj grad	I nogen grad	I nogen grad	I nogen grad	I nogen grad	Middel	Middel	Middel	Gode	Gode	Nej	Spadserer, cykler eller har anden lettere motion mindst 4 timer om ugen (medregn også cykling/gang til skole)	Virkelig god	Ved ikke	Jeg klarer mig middelt	I høj grad	Ja, mere en 11 cigaretter om dagen	Ja - Teknologi, byggeri og transport.		Campus Bornholm Erhversskole	0	0	0	1	0				0-10 minutter	16
			0	0	0	0	0	0																														0	1	0	0	0
Kvinde	17	20	1	0	1	0	0	0		I nogen grad	I nogen grad	I høj grad	I meget høj grad	I mindre grad	I nogen grad	I mindre grad	Slet ikke	I meget høj grad	I meget høj grad	I meget høj grad	I meget høj grad	I nogen grad	Gode	Gode	Gode	Gode	Gode	Ved ikke	Spadserer, cykler eller har anden lettere motion mindst 4 timer om ugen (medregn også cykling/gang til skole)	Nogenlunde	Ja	Ved ikke	I høj grad	Nej	Ja - Omsorg, sundhed og pædagogik		SOSU Aarhus	0	0	0	1	0				15-25 minutter	17
			0	0	0	0	0	0																														0	1	0	0	0
			0	0	0	0	0	0																														0	1	0	0	0
Kvinde	17	25	1	0	1	0	0	0		I høj grad	I nogen grad	I høj grad	I høj grad	I nogen grad	I høj grad	Slet ikke	I mindre grad	I høj grad	I nogen grad	I nogen grad	I nogen grad	I nogen grad	Ved ikke	Middel	Middel	Middel	Middel	Nej	Spadserer, cykler eller har anden lettere motion mindst 4 timer om ugen (medregn også cykling/gang til skole)	Nogenlunde	Ja	Jeg klarer mig ikke så godt	I nogen grad	Nej	Ja - Omsorg, sundhed og pædagogik		SOSU Kolding	0	0	0	1	0				15-25 minutter	17
Mand	18	10	0	0	0	0	1	0		Slet ikke	Slet ikke	Ved ikke	Ved ikke	Ved ikke	Ved ikke	Slet ikke	Slet ikke	Ved ikke	I mindre grad	I mindre grad	I mindre grad	I mindre grad	Dårlige	Dårlige	Dårlige	Dårlige	Dårlige	Måske	Spadserer, cykler eller har anden lettere motion mindst 4 timer om ugen (medregn også cykling/gang til skole)	God	Nej	Jeg klarer mig middelt	I meget høj grad	Nej	Ja - Teknologi, byggeri og transport.		EUC NORD	0	0	0	1	0				0-10 minutter	18
Kvinde	17	25	0	0	1	1	0	0		I meget høj grad	I meget høj grad	I meget høj grad	I nogen grad	I nogen grad	I nogen grad	Slet ikke	Slet ikke	I meget høj grad	I høj grad	I nogen grad	I meget høj grad	I mindre grad	Middel	Dårlige	Middel	Gode	Middel	Ja	Spadserer, cykler eller har anden lettere motion mindst 4 timer om ugen (medregn også cykling/gang til skole)	God	Ja	Jeg klarer mig godt	I mindre grad	Ja en gang imellem til fester	Ja - Omsorg, sundhed og pædagogik		Eux Holbæk	0	0	0	1	0				15-25 minutter	17
Kvinde	16	30	0	1	1	0	0	0		I meget høj grad	I meget høj grad	I meget høj grad	I høj grad	I høj grad	I meget høj grad	Slet ikke	Slet ikke	I nogen grad	I meget høj grad	I meget høj grad	I meget høj grad	I høj grad	Dårlige	Middel	Middel	Meget gode	Meget gode	Nej	Spadserer, cykler eller har anden lettere motion mindst 4 timer om ugen (medregn også cykling/gang til skole)	God	Nej	Jeg klarer mig godt	I høj grad	Nej	Ja - Omsorg, sundhed og pædagogik		SOSU Aarhus	0	0	0	1	0				30-40 minutter	16
Kvinde	17	25	0	1	0	0	0	0		I nogen grad	I nogen grad	I høj grad	I høj grad	I nogen grad	I høj grad	I nogen grad	Slet ikke	I meget høj grad	I nogen grad	I nogen grad	I høj grad	I nogen grad	Gode	Middel	Gode	Gode	Middel	Nej	Spadserer, cykler eller har anden lettere motion mindst 4 timer om ugen (medregn også cykling/gang til skole)	God	Ja	Jeg klarer mig godt	I høj grad	Nej	Ja - Omsorg, sundhed og pædagogik		SOSU Esbjerg	0	0	0	1	0				15-25 minutter	17
Mand	16	45	0	1	1	0	0	0		I meget høj grad	I nogen grad	I nogen grad	I meget høj grad	I nogen grad	I nogen grad	I nogen grad	I nogen grad	I meget høj grad	I nogen grad	I nogen grad	I nogen grad	I nogen grad	Gode	Gode	Gode	Ved ikke	Middel	Måske	Læser, ser fjernsyn eller har anden stillesiddende beskæftigelse	God	Ved ikke	Jeg klarer mig middelt	I høj grad	Nej	Ja - Teknologi, byggeri og transport.		Aarhus Tech	0	0	0	1	0				45 - over 60 min	16
Kvinde	17	15	1	0	1	0	0	1	morgen aktivitet	I meget høj grad	I meget høj grad	I meget høj grad	I meget høj grad	I høj grad	I meget høj grad	Ved ikke	Ved ikke	I meget høj grad	I meget høj grad	I meget høj grad	I meget høj grad	I meget høj grad	Meget gode	Middel	Gode	Meget gode	Gode	Måske	Spadserer, cykler eller har anden lettere motion mindst 4 timer om ugen (medregn også cykling/gang til skole)	Nogenlunde	Ja	Jeg klarer mig middelt	I nogen grad					0	0	1	0	0				15-25 minutter	17
Mand	17	25	0	0	1	0	0	0		I høj grad	I nogen grad	I høj grad	I meget høj grad	I mindre grad	I nogen grad	Ved ikke	I høj grad	I meget høj grad	I høj grad	I meget høj grad	I meget høj grad	I meget høj grad	Gode	Meget gode	Meget gode	Meget gode	Meget gode	Nej	Dyrker motionsidræt, løber eller lignende mindst 4 timer om ugen	Nogenlunde	Ja	Jeg klarer mig godt	I meget høj grad	Nej	Ja - Teknologi, byggeri og transport.		holbæk	0	0	0	1	0				15-25 minutter	17
Mand	18	30	1	0	1	0	1	0		I meget høj grad	I meget høj grad	I meget høj grad	I meget høj grad	I høj grad	I meget høj grad	Slet ikke	Slet ikke	I meget høj grad	I meget høj grad	I meget høj grad	I meget høj grad	I meget høj grad	Meget gode	Meget gode	Meget gode	Meget gode	Meget gode	Nej	Spadserer, cykler eller har anden lettere motion mindst 4 timer om ugen (medregn også cykling/gang til skole)	God	Ja	Jeg klarer mig godt	I meget høj grad	Nej	Ja - Omsorg, sundhed og pædagogik		SOSU skolen i horsens	0	0	0	1	0				30-40 minutter	18
Mand	17	20	1	0	1	0	1	0		I nogen grad	I høj grad	I nogen grad	I høj grad	I nogen grad	I mindre grad	Slet ikke	I mindre grad	I høj grad	I høj grad	I mindre grad	I meget høj grad	I mindre grad	Middel	Meget gode	Middel	Dårlige	Ved ikke	Ved ikke	Dyrker motionsidræt, løber eller lignende mindst 4 timer om ugen	God	Ja	Jeg klarer mig godt	I mindre grad	Nej	Ja - Teknologi, byggeri og transport.		EUC Nordvestsjælland	0	0	0	1	0				15-25 minutter	17
			0	0	0	0	0	0																														0	1	0	0	0
Mand	18	15	0	1	1	0	0	0		I meget høj grad	I meget høj grad	I meget høj grad	I meget høj grad	I meget høj grad	I meget høj grad	I meget høj grad	I meget høj grad	I meget høj grad	I meget høj grad	I meget høj grad	I meget høj grad	I meget høj grad	Meget gode	Meget gode	Meget gode	Meget gode	Meget gode	Nej	Spadserer, cykler eller har anden lettere motion mindst 4 timer om ugen (medregn også cykling/gang til skole)	God	Ja	Jeg klarer mig meget godt	I høj grad	Ja, mere en 11 cigaretter om dagen	Ja - Teknologi, byggeri og transport.		sosu	0	0	0	1	0				15-25 minutter	18
Kvinde	18	10	0	1	1	0	0	0		I meget høj grad	I meget høj grad	I meget høj grad	I høj grad	I meget høj grad	I meget høj grad	Slet ikke	Slet ikke	I meget høj grad	I meget høj grad	I nogen grad	I meget høj grad	I høj grad	Middel	Meget dårlige	Middel	Middel	Meget dårlige	Nej	Dyrker motionsidræt, løber eller lignende mindst 4 timer om ugen	Nogenlunde	Ja	Jeg klarer mig meget godt	I nogen grad	Nej	Ja - Omsorg, sundhed og pædagogik		SOSU Horsens	0	0	0	1	0				0-10 minutter	18
			0	0	0	0	0	0																														0	1	0	0	0
Mand	16	5	1	1	0	0	0	0		I høj grad	I nogen grad	I nogen grad	I høj grad	Slet ikke	I nogen grad	I mindre grad	Slet ikke	I høj grad	I mindre grad	I høj grad	I mindre grad	I mindre grad	Gode	Middel	Middel	Middel	Gode	Ja	Spadserer, cykler eller har anden lettere motion mindst 4 timer om ugen (medregn også cykling/gang til skole)	Mindre god	Ja	Jeg klarer mig godt	I høj grad	ja, 6-10 cigaretter om dagen	Ja - Omsorg, sundhed og pædagogik		Sosu fyn	0	0	0	1	0				0-10 minutter	16
			0	0	0	0	0	0																														0	1	0	0	0
Kvinde	17	5	0	1	0	0	0	0		I meget høj grad	I meget høj grad	I meget høj grad	I meget høj grad	I høj grad	I meget høj grad	Ved ikke	Slet ikke	I høj grad	I mindre grad	I høj grad	I nogen grad	I meget høj grad	Meget dårlige	Middel	Meget dårlige	Gode	Meget dårlige	Ja	Spadserer, cykler eller har anden lettere motion mindst 4 timer om ugen (medregn også cykling/gang til skole)	Nogenlunde	Ja	Jeg klarer mig godt	I nogen grad	Ja, mere en 11 cigaretter om dagen	Ja - Omsorg, sundhed og pædagogik		Sosu	0	0	0	1	0				0-10 minutter	17
			0	0	0	0	0	0																														0	1	0	0	0
Mand	16	20	1	0	0	0	0	0		I høj grad	I høj grad	I høj grad	I høj grad	I høj grad	I nogen grad	I mindre grad	Slet ikke	I høj grad	I høj grad	I høj grad	I høj grad	I høj grad	Middel	Middel	Middel	Dårlige	Middel	Nej	Spadserer, cykler eller har anden lettere motion mindst 4 timer om ugen (medregn også cykling/gang til skole)	Nogenlunde	Ja	Jeg klarer mig middelt	I høj grad	Nej	Ja - Teknologi, byggeri og transport.		Euc nord	0	0	0	1	0				15-25 minutter	16
Kvinde	16	10	1	0	0	1	0	0		I nogen grad	I høj grad	I høj grad	I høj grad	I nogen grad	I meget høj grad	I mindre grad	Slet ikke	I meget høj grad	I høj grad	I høj grad	I høj grad	I høj grad	Middel	Gode	Gode	Middel	Gode	Måske	Spadserer, cykler eller har anden lettere motion mindst 4 timer om ugen (medregn også cykling/gang til skole)	Nogenlunde	Ja	Jeg klarer mig meget godt	I høj grad	ja, 1-5 cigaretter om dagen	Ja - Omsorg, sundhed og pædagogik		Sosu	0	0	0	1	0				0-10 minutter	16
			0	0	0	0	0	0																														0	1	0	0	0
Kvinde	18	45	0	0	1	0	1	0		I høj grad	I høj grad	I høj grad	I meget høj grad	I høj grad	I meget høj grad	Slet ikke	Slet ikke	I meget høj grad	I høj grad	I høj grad	I høj grad	I høj grad	Gode	Meget gode	Meget gode	Middel	Middel	Nej	Dyrker motionsidræt, løber eller lignende mindst 4 timer om ugen	God	Ja	Jeg klarer mig godt	I høj grad	Nej	Ja - Omsorg, sundhed og pædagogik		sosu Frederica-Vejle-Horsens	0	0	0	1	0				45 - over 60 min	18
			0	0	0	0	0	0																														0	1	0	0	0
Kvinde	17	20	0	1	1	0	0	0		I høj grad	I høj grad	I høj grad	I meget høj grad	I nogen grad	I nogen grad	Slet ikke	Ved ikke	I høj grad	I høj grad	I meget høj grad	I høj grad	I nogen grad	Gode	Gode	Middel	Gode	Ved ikke	Ja	Læser, ser fjernsyn eller har anden stillesiddende beskæftigelse	Mindre god	Ved ikke	Jeg klarer mig godt	I meget høj grad	Ja, mere en 11 cigaretter om dagen	Ja - Omsorg, sundhed og pædagogik		Randers social- og sundhedsskole	0	0	0	1	0				15-25 minutter	17
Mand	16	35	0	0	1	0	0	0		I nogen grad	I høj grad	I nogen grad	I nogen grad	Ved ikke	I høj grad	I nogen grad	Slet ikke	I nogen grad	I meget høj grad	I meget høj grad	I meget høj grad	I høj grad	Gode	Middel	Meget gode	Dårlige	Middel	Ved ikke	Læser, ser fjernsyn eller har anden stillesiddende beskæftigelse	Nogenlunde	Ved ikke	Jeg klarer mig godt	I nogen grad	Nej	Ja - Teknologi, byggeri og transport.		EUC syd Sønderborg	0	0	0	1	0				30-40 minutter	16
			0	0	0	0	0	0																														0	1	0	0	0
Mand	17	over 60	0	0	1	0	1	0		I meget høj grad	I meget høj grad	I meget høj grad	I meget høj grad	I meget høj grad	I meget høj grad	I meget høj grad	I meget høj grad	I meget høj grad	Slet ikke	Slet ikke	Slet ikke	Slet ikke	Ved ikke	Meget gode	Ved ikke	Meget gode	Meget gode	Nej	Træner hårdt og dyrker konkurrenceidræt regelmæssigt og flere gange om ugen	Virkelig god	Ja	Jeg klarer mig middelt	I høj grad	Nej	Ja - Teknologi, byggeri og transport.		skive teknisk skole	0	0	0	1	0				45 - over 60 min	17
Kvinde	16	10	0	1	1	0	0	0		I høj grad	I mindre grad	I nogen grad	I høj grad	Slet ikke	I mindre grad	Ved ikke	I nogen grad	I nogen grad	I nogen grad	I høj grad	I høj grad	I nogen grad	Gode	Gode	Gode	Gode	Gode	Nej	Læser, ser fjernsyn eller har anden stillesiddende beskæftigelse	Nogenlunde	Ved ikke	Jeg klarer mig godt	I meget høj grad	Nej	Ja - Omsorg, sundhed og pædagogik		SOSU	0	0	0	1	0				0-10 minutter	16
Kvinde	17	40	0	0	1	0	0	0		I nogen grad	I nogen grad	Ved ikke	Ved ikke	Ved ikke	I høj grad	Ved ikke	Ved ikke	I høj grad	Ved ikke	I høj grad	Ved ikke	I høj grad	Gode	Middel	Middel	Ved ikke	Ved ikke	Nej	Læser, ser fjernsyn eller har anden stillesiddende beskæftigelse	Mindre god	Ja	Jeg klarer mig middelt	I høj grad	Nej	Nej - jeg ved ikke hvilket hovedområde, jeg er tilknyttet (skriv gerne hvad din uddannelse hedder)	Food College	Tech College	0	0	0	1	0				30-40 minutter	17
Mand	17	20	0	0	1	1	0	0		I nogen grad	Slet ikke	I mindre grad	I mindre grad	Slet ikke	Slet ikke	I mindre grad	I meget høj grad	Slet ikke	I nogen grad	I mindre grad	I nogen grad	Slet ikke	Middel	Middel	Meget dårlige	Meget gode	Meget dårlige	Ja	Spadserer, cykler eller har anden lettere motion mindst 4 timer om ugen (medregn også cykling/gang til skole)	Dårlig	Nej	Jeg klarer mig godt	Slet ikke	Ja, mere en 11 cigaretter om dagen	Ja - Teknologi, byggeri og transport.		campus bornholm	0	0	0	1	0				15-25 minutter	17
Mand	17	45	0	1	0	1	0	0		I meget høj grad	I høj grad	I nogen grad	I meget høj grad	I meget høj grad	I meget høj grad	Ved ikke	Ved ikke	I meget høj grad	I nogen grad	I meget høj grad	I meget høj grad	I meget høj grad	Middel	Meget gode	Gode	Gode	Meget gode	Ja	Træner hårdt og dyrker konkurrenceidræt regelmæssigt og flere gange om ugen	Nogenlunde	Ja	Jeg klarer mig godt	I høj grad	Nej	Ja - Fødevarer, jordbrug og oplevelser		Tech	0	0	0	1	0				45 - over 60 min	17
Kvinde	17	20	1	0	0	0	0	0		I høj grad	I nogen grad	I nogen grad	I meget høj grad	I mindre grad	I nogen grad	Slet ikke	Slet ikke	I meget høj grad	I nogen grad	I høj grad	I nogen grad	I nogen grad	Gode	Meget gode	Meget gode	Gode	Meget gode	Nej	Spadserer, cykler eller har anden lettere motion mindst 4 timer om ugen (medregn også cykling/gang til skole)	Nogenlunde	Ja	Jeg klarer mig godt	I meget høj grad	ja, 6-10 cigaretter om dagen	Ja - Omsorg, sundhed og pædagogik		Sosu fyn	0	0	0	1	0				15-25 minutter	17
Mand	16	over 60	1	1	1	1	1	0		I høj grad	I nogen grad	I mindre grad	I høj grad	I nogen grad	I nogen grad	I mindre grad	I mindre grad	I nogen grad	I nogen grad	I nogen grad	I høj grad	I nogen grad	Middel	Gode	Gode	Gode	Dårlige	Nej	Spadserer, cykler eller har anden lettere motion mindst 4 timer om ugen (medregn også cykling/gang til skole)	God	Ja	Jeg klarer mig meget godt	I høj grad	Nej	Ja - Teknologi, byggeri og transport.		EUC Nord Frederikshavn	0	0	0	1	0				45 - over 60 min	16
			0	0	0	0	0	0																														0	1	0	0	0
Kvinde	18	20	0	1	0	0	0	0		I høj grad	I nogen grad	I mindre grad	I nogen grad	Slet ikke	Slet ikke	Slet ikke	Ved ikke	I høj grad	I mindre grad	I nogen grad	I mindre grad	I mindre grad	Middel	Middel	Gode	Ved ikke	Gode	Måske	Træner hårdt og dyrker konkurrenceidræt regelmæssigt og flere gange om ugen	Virkelig god	Ja	Jeg klarer mig middelt	I nogen grad	Nej	Ja - Omsorg, sundhed og pædagogik		Sosu Fyn	0	0	0	1	0				15-25 minutter	18
Mand	17	10	0	1	1	0	0	1	i timerne	I nogen grad	I nogen grad	I mindre grad	I nogen grad	I mindre grad	I mindre grad	I mindre grad	I mindre grad	I mindre grad																				0	0	1	0	0				0-10 minutter	17
			0	0	0	0	0	0																														0	1	0	0	0
Mand	17	20	0	1	0	1	0	0		I meget høj grad	I nogen grad	I nogen grad	I nogen grad	Slet ikke	I meget høj grad	Slet ikke	I nogen grad	I meget høj grad	I mindre grad	I høj grad	I høj grad	I høj grad	Gode	Middel	Ved ikke	Middel	Gode	Ja	Spadserer, cykler eller har anden lettere motion mindst 4 timer om ugen (medregn også cykling/gang til skole)	God	Ja	Jeg klarer mig middelt	I nogen grad	Nej	Ja - Omsorg, sundhed og pædagogik		Sosu Fyn	0	0	0	1	0				15-25 minutter	17
Mand	17	over 60	0	0	0	0	1	0		I høj grad	I nogen grad	I nogen grad	I høj grad	Ved ikke	Ved ikke	I nogen grad	Ved ikke	I høj grad	I nogen grad	I nogen grad	I høj grad	Ved ikke	Middel	Gode	Middel	Ved ikke	Ved ikke	Nej	Læser, ser fjernsyn eller har anden stillesiddende beskæftigelse	Nogenlunde	Ja	Jeg klarer mig middelt	I høj grad	Nej	Ja - Teknologi, byggeri og transport.		Aarhus tech	0	0	0	1	0				45 - over 60 min	17
			0	0	0	0	0	0																														0	1	0	0	0
Mand	17	over 60	0	0	0	0	1	0		Slet ikke	I mindre grad	Slet ikke	Slet ikke	I nogen grad	Ved ikke	I meget høj grad	I mindre grad	Slet ikke	I nogen grad	I mindre grad	I mindre grad	I mindre grad	Gode	Gode	Gode	Middel	Gode	Nej	Dyrker motionsidræt, løber eller lignende mindst 4 timer om ugen	Virkelig god	Nej	Jeg klarer mig middelt	I nogen grad	Ja, mere en 11 cigaretter om dagen	Ja - Teknologi, byggeri og transport.	Smed	euc Holbæk	0	0	1	0	0				45 - over 60 min	17
Mand	16	10	0	0	0	0	1	0		I meget høj grad	I høj grad	I meget høj grad	I meget høj grad	Slet ikke	I mindre grad	Slet ikke	I meget høj grad	I meget høj grad	I meget høj grad	I meget høj grad	I meget høj grad	I meget høj grad	Gode	Middel	Meget gode	Middel	Middel	Nej	Spadserer, cykler eller har anden lettere motion mindst 4 timer om ugen (medregn også cykling/gang til skole)	Nogenlunde	Ja	Jeg klarer mig meget godt	I meget høj grad	Nej	Ja - Teknologi, byggeri og transport.		EUC Sønderborg	0	0	0	1	0				0-10 minutter	16
Mand	16	20	0	0	1	0	0	0		I nogen grad	Slet ikke	I mindre grad	I mindre grad	I mindre grad	I nogen grad	Ved ikke	I nogen grad	I mindre grad	I høj grad	I meget høj grad	I høj grad	I mindre grad	Middel	Middel	Gode	Middel	Meget dårlige	Måske	Spadserer, cykler eller har anden lettere motion mindst 4 timer om ugen (medregn også cykling/gang til skole)	God	Ved ikke	Jeg klarer mig godt	I nogen grad	Ja en gang imellem til fester	Ja - Omsorg, sundhed og pædagogik		sosu	0	0	0	1	0				15-25 minutter	16
Mand	16	15	0	1	0	1	1	0																														0	0	1	0	0				15-25 minutter	16
Kvinde	17	25	0	1	0	1	0	0		I høj grad	I høj grad	I høj grad	I høj grad	I mindre grad	I høj grad	I mindre grad	I mindre grad	I høj grad	I høj grad	I høj grad	I høj grad	I nogen grad	Gode	Gode	Gode	Meget gode	Meget gode	Nej	Spadserer, cykler eller har anden lettere motion mindst 4 timer om ugen (medregn også cykling/gang til skole)	Nogenlunde	Ja	Jeg klarer mig godt	I høj grad	Nej	Ja - Omsorg, sundhed og pædagogik		SOSU Randers	0	0	0	1	0				15-25 minutter	17
Mand	17	5	1	0	0	0	0	0		I meget høj grad	I høj grad	I høj grad	I høj grad	I høj grad	I høj grad	Slet ikke	Slet ikke	I høj grad	I høj grad	Slet ikke	I meget høj grad	I høj grad	Gode	Meget gode	Gode	Ved ikke	Ved ikke	Nej	Spadserer, cykler eller har anden lettere motion mindst 4 timer om ugen (medregn også cykling/gang til skole)	God	Ja	Jeg klarer mig godt	I høj grad	Nej	Ja - Teknologi, byggeri og transport.		Mercantec	0	0	0	1	0				0-10 minutter	17
Kvinde	18	10	0	0	1	0	1	0		I høj grad	I nogen grad	I nogen grad	I meget høj grad	I mindre grad	I nogen grad	Slet ikke	Slet ikke	I meget høj grad	I høj grad	Slet ikke	I meget høj grad	I nogen grad	Dårlige	Middel	Gode	Dårlige	Meget dårlige	Nej	Spadserer, cykler eller har anden lettere motion mindst 4 timer om ugen (medregn også cykling/gang til skole)	Nogenlunde	Ja	Jeg klarer mig godt	I høj grad	Nej	Ja - Omsorg, sundhed og pædagogik		SOSU Kolding	0	0	0	1	0				0-10 minutter	18
Kvinde	18	35	0	1	1	0	0	0		I meget høj grad	I meget høj grad	I meget høj grad	I meget høj grad	I meget høj grad	I meget høj grad	Slet ikke	I meget høj grad	I meget høj grad	I høj grad	I høj grad	I høj grad	I høj grad	Middel	Gode	Gode	Gode	Meget gode	Ja	Læser, ser fjernsyn eller har anden stillesiddende beskæftigelse	Mindre god	Ja	Jeg klarer mig godt	I høj grad	Nej	Ja - Omsorg, sundhed og pædagogik		SOSU RANDERS	0	0	0	1	0				30-40 minutter	18
Mand	16	5	0	0	1	0	0	0		I mindre grad	I nogen grad	I mindre grad	I mindre grad	I mindre grad	I nogen grad	I mindre grad	I nogen grad	I nogen grad	I nogen grad	I nogen grad	I nogen grad	I høj grad	Gode	Middel	Middel	Dårlige	Dårlige	Ved ikke	Spadserer, cykler eller har anden lettere motion mindst 4 timer om ugen (medregn også cykling/gang til skole)	God	Nej	Jeg klarer mig godt	I mindre grad	Nej	Ja - Teknologi, byggeri og transport.		aarhus tech	0	0	0	1	0				0-10 minutter	16
Kvinde	17	30	1	0	0	1	1	0		I høj grad	I nogen grad	I nogen grad	I nogen grad	I høj grad	I nogen grad	Slet ikke	I mindre grad	I nogen grad	I nogen grad	I høj grad	I nogen grad	I høj grad	Middel	Meget gode	Middel	Ved ikke	Ved ikke	Ved ikke	Læser, ser fjernsyn eller har anden stillesiddende beskæftigelse	Mindre god	Ved ikke	Jeg klarer mig middelt	I høj grad	Nej	Ja - Fødevarer, jordbrug og oplevelser		Agri College	0	0	0	1	0				30-40 minutter	17
			0	0	0	0	0	0																														0	1	0	0	0
Mand	16	30	0	0	1	0	0	0		I høj grad	Slet ikke	I nogen grad	I meget høj grad	Slet ikke	I høj grad	I mindre grad	I nogen grad	I nogen grad	I nogen grad	Slet ikke	I nogen grad	I nogen grad	Gode	Middel	Meget gode	Dårlige	Gode	Nej	Spadserer, cykler eller har anden lettere motion mindst 4 timer om ugen (medregn også cykling/gang til skole)	Nogenlunde	Ja	Jeg klarer mig godt	I nogen grad	Nej	Ja - Teknologi, byggeri og transport.		Skive Tekniske Skole	0	0	0	1	0				30-40 minutter	16
Kvinde	16	10	1	0	0	1	0	0		I høj grad	I høj grad	I nogen grad	I nogen grad	I mindre grad	I nogen grad	Slet ikke	I mindre grad	I høj grad	I meget høj grad	I høj grad	I høj grad	I nogen grad	Middel	Gode	Gode	Gode	Gode	Nej	Spadserer, cykler eller har anden lettere motion mindst 4 timer om ugen (medregn også cykling/gang til skole)	God	Ja	Jeg klarer mig godt	I høj grad	Nej	Ja - Omsorg, sundhed og pædagogik		Social og sundhedsskolen fyn	0	0	0	1	0				0-10 minutter	16
Kvinde	18	over 60	0	0	1	1	0	0		I meget høj grad	I meget høj grad	I meget høj grad	I meget høj grad	I meget høj grad	I nogen grad	Slet ikke	Slet ikke	I meget høj grad	I meget høj grad	I meget høj grad	I meget høj grad	Slet ikke	Meget gode	Dårlige	Dårlige	Gode	Meget dårlige	Nej	Dyrker motionsidræt, løber eller lignende mindst 4 timer om ugen	God	Ja	Jeg klarer mig meget godt	I meget høj grad	Ja en gang imellem til fester	Ja - Omsorg, sundhed og pædagogik		SOSU	0	0	0	1	0				45 - over 60 min	18
Kvinde	18	10	0	1	1	0	0	0		I nogen grad	I nogen grad	I høj grad	I høj grad	I nogen grad	I nogen grad	Slet ikke	Slet ikke	I nogen grad	I høj grad	I høj grad	I høj grad	I meget høj grad	Gode	Meget gode	Gode	Meget gode	Gode	Ved ikke	Læser, ser fjernsyn eller har anden stillesiddende beskæftigelse	Nogenlunde	Ved ikke	Jeg klarer mig godt	I høj grad	Nej	Ja - Omsorg, sundhed og pædagogik		SOS- horsens	0	0	0	1	0				0-10 minutter	18
Kvinde	17	35	0	0	1	0	0	0		I høj grad	I høj grad	I høj grad	I høj grad	I høj grad	I nogen grad	I høj grad	I høj grad	I høj grad	I nogen grad	I nogen grad	I nogen grad	I nogen grad	Middel	Middel	Middel	Dårlige	Middel	Nej	Læser, ser fjernsyn eller har anden stillesiddende beskæftigelse	Nogenlunde	Nej	Jeg klarer mig godt	I høj grad	Nej	Ja - Teknologi, byggeri og transport.		Holbæk EUC	0	0	0	1	0				30-40 minutter	17
Kvinde	16	45	0	0	1	0	0	0		I nogen grad	I nogen grad	Ved ikke	I mindre grad	Slet ikke	Slet ikke	I nogen grad	Ved ikke	I nogen grad	I nogen grad	I meget høj grad	I meget høj grad	I meget høj grad	Middel	Middel	Middel	Meget dårlige	Middel	Ja	Træner hårdt og dyrker konkurrenceidræt regelmæssigt og flere gange om ugen	God								0	0	1	0	0				45 - over 60 min	16
Mand	17	20	0	0	1	0	0	0		I høj grad	I nogen grad	I nogen grad	I høj grad	Slet ikke	I høj grad	Slet ikke	Slet ikke	I høj grad	I nogen grad	I nogen grad	I nogen grad	I høj grad	Meget gode	Gode	Gode	Meget gode	Gode	Nej	Læser, ser fjernsyn eller har anden stillesiddende beskæftigelse	Nogenlunde	Ja	Jeg klarer mig godt	I høj grad	Nej	Ja - Teknologi, byggeri og transport.		Skive Tekniske skole	0	0	0	1	0				15-25 minutter	17
			0	0	0	0	0	0																														0	1	0	0	0
Mand	16	10	0	0	0	0	0	1	en gang imelem i timerne	I høj grad	I nogen grad	I nogen grad	I høj grad	Slet ikke	I mindre grad	I nogen grad	I mindre grad	I høj grad	I høj grad	I høj grad	I høj grad	I nogen grad	Gode	Gode	Gode	Dårlige	Gode	Måske	Dyrker motionsidræt, løber eller lignende mindst 4 timer om ugen	God	Nej	Jeg klarer mig godt	I høj grad	Nej	Ja - Teknologi, byggeri og transport.		celf	0	0	0	1	0				0-10 minutter	16
Mand	17	20	0	0	1	0	0	0		I høj grad	I høj grad	I høj grad	I høj grad	I nogen grad	I nogen grad	Slet ikke	Ved ikke	I høj grad	I høj grad	I høj grad	I høj grad	I høj grad	Gode	Gode	Gode	Gode	Gode	Nej	Spadserer, cykler eller har anden lettere motion mindst 4 timer om ugen (medregn også cykling/gang til skole)	God	Ja	Jeg klarer mig godt	I høj grad	Nej	Ja - Teknologi, byggeri og transport.		Skive teknisk	0	0	0	1	0				15-25 minutter	17
			0	0	0	0	0	0																														0	1	0	0	0
Kvinde	17	30	0	1	0	0	0	0		I meget høj grad	I meget høj grad	I nogen grad	I meget høj grad	I nogen grad	I høj grad	Slet ikke	Slet ikke	I meget høj grad	Ved ikke	I meget høj grad	I meget høj grad	I nogen grad	Ved ikke	Dårlige	Ved ikke	Meget dårlige	Meget gode	Nej	Dyrker motionsidræt, løber eller lignende mindst 4 timer om ugen	God	Ja	Jeg klarer mig godt	I nogen grad	Nej	Ja - Fødevarer, jordbrug og oplevelser		Aalborg Tech Agri College	0	0	0	1	0				30-40 minutter	17
Mand	17	20	0	0	0	0	1	0		I nogen grad	I mindre grad	I mindre grad	I mindre grad	I nogen grad	I høj grad	I nogen grad	I mindre grad	I nogen grad	I høj grad	I nogen grad	I høj grad	I høj grad	Middel	Gode	Gode	Gode	Meget dårlige	Måske	Spadserer, cykler eller har anden lettere motion mindst 4 timer om ugen (medregn også cykling/gang til skole)	Nogenlunde	Ved ikke	Jeg klarer mig godt	I nogen grad	Ja en gang imellem til fester	Ja - Teknologi, byggeri og transport.		Sønderborg	0	0	0	1	0				15-25 minutter	17
[truncated: 167 more rows]

## Sheet: Structure
questionName	variableName	questionType	subType	questionText	choiceValue	choiceText
s_14	s_14	Closed	Single	Hvilket køn er du?
s_15	s_15	Open	Double	Hvor gammel er du?
s_1	s_1	Closed	Single	Hvor mange minutters motion og bevægelse vurderer du, at der har været i gennemsnit om dagen på dit grundforløb 1?
[truncated: 45 more rows]
